# Supplementary material for: Prediction and Analysis of Retinoblastoma Related Genes through Gene Ontology and KEGG
Source: Hindawi journal article supplement (doi:10.1155/2013/304029), 2013-01-01

**Dataset 2**

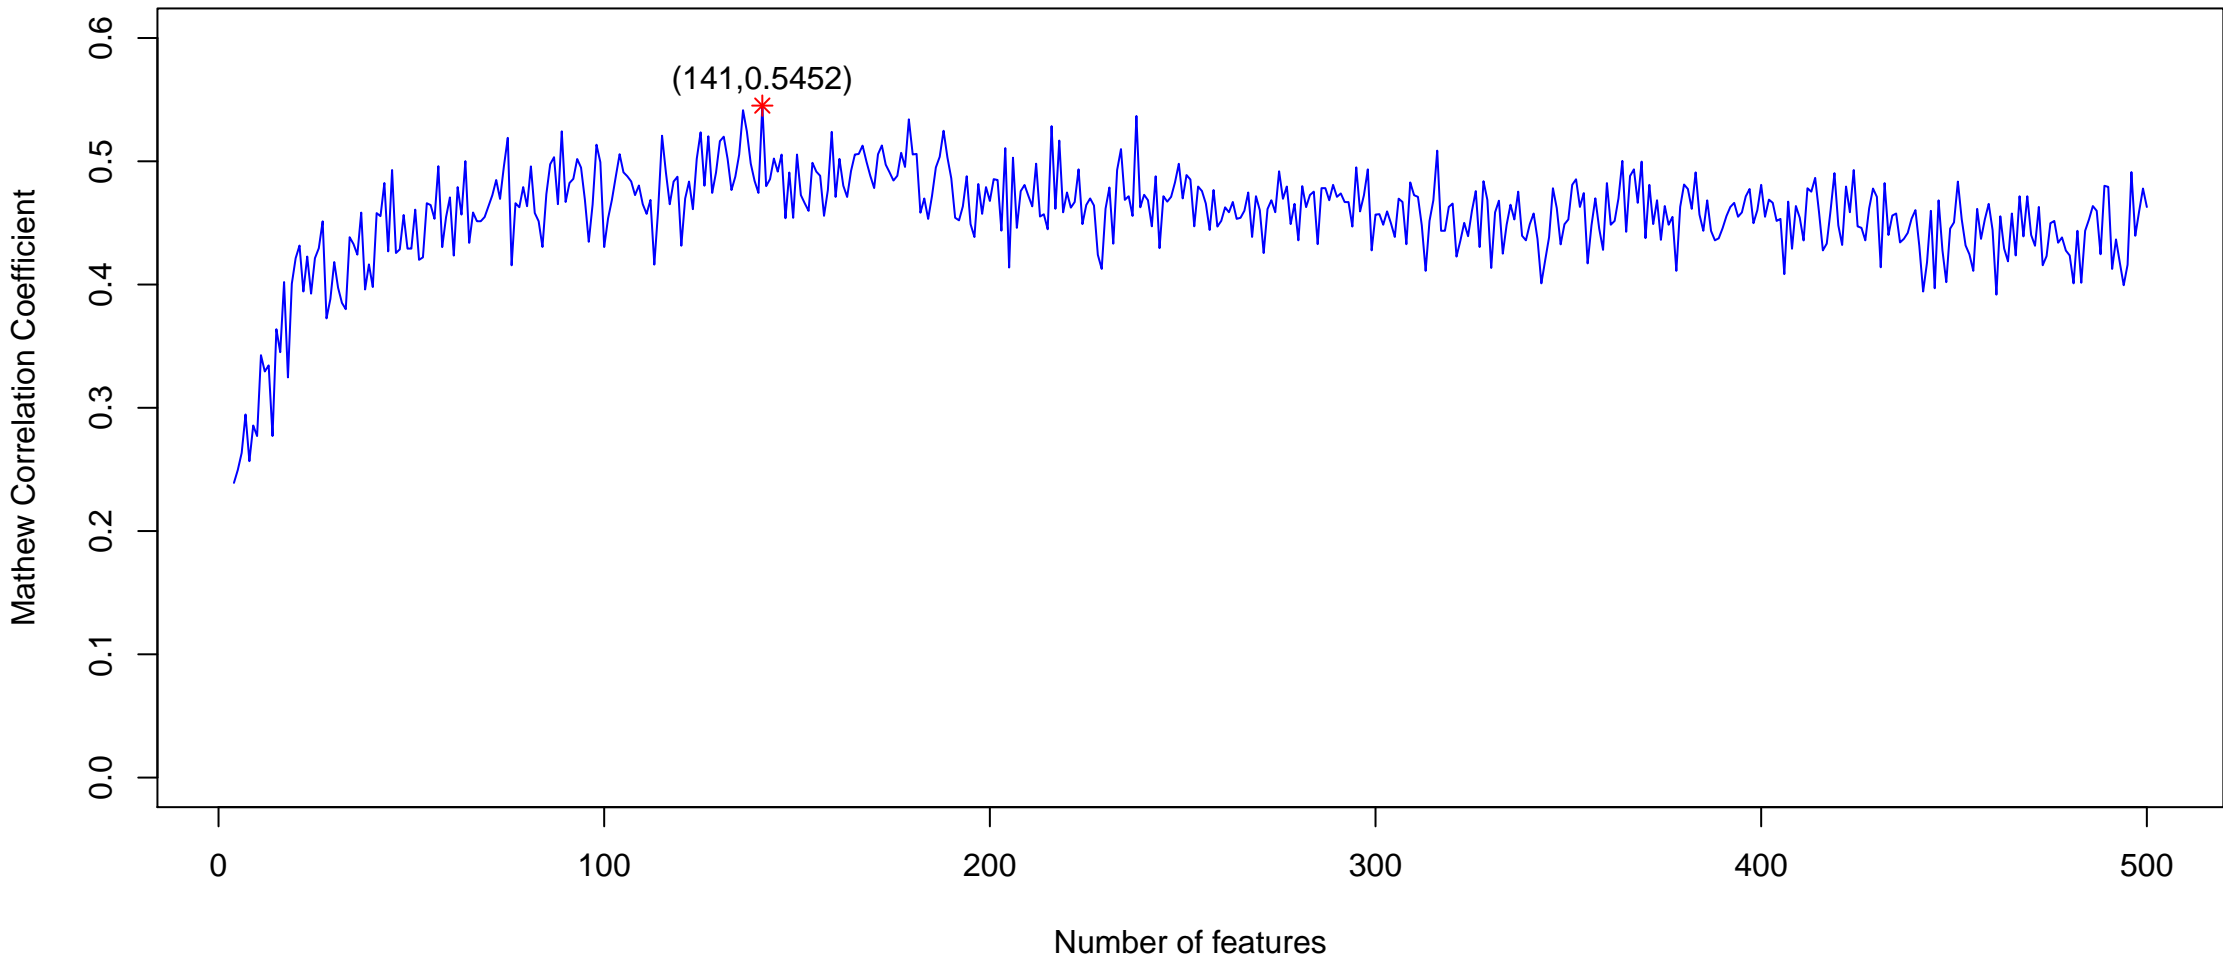

**Dataset 3**

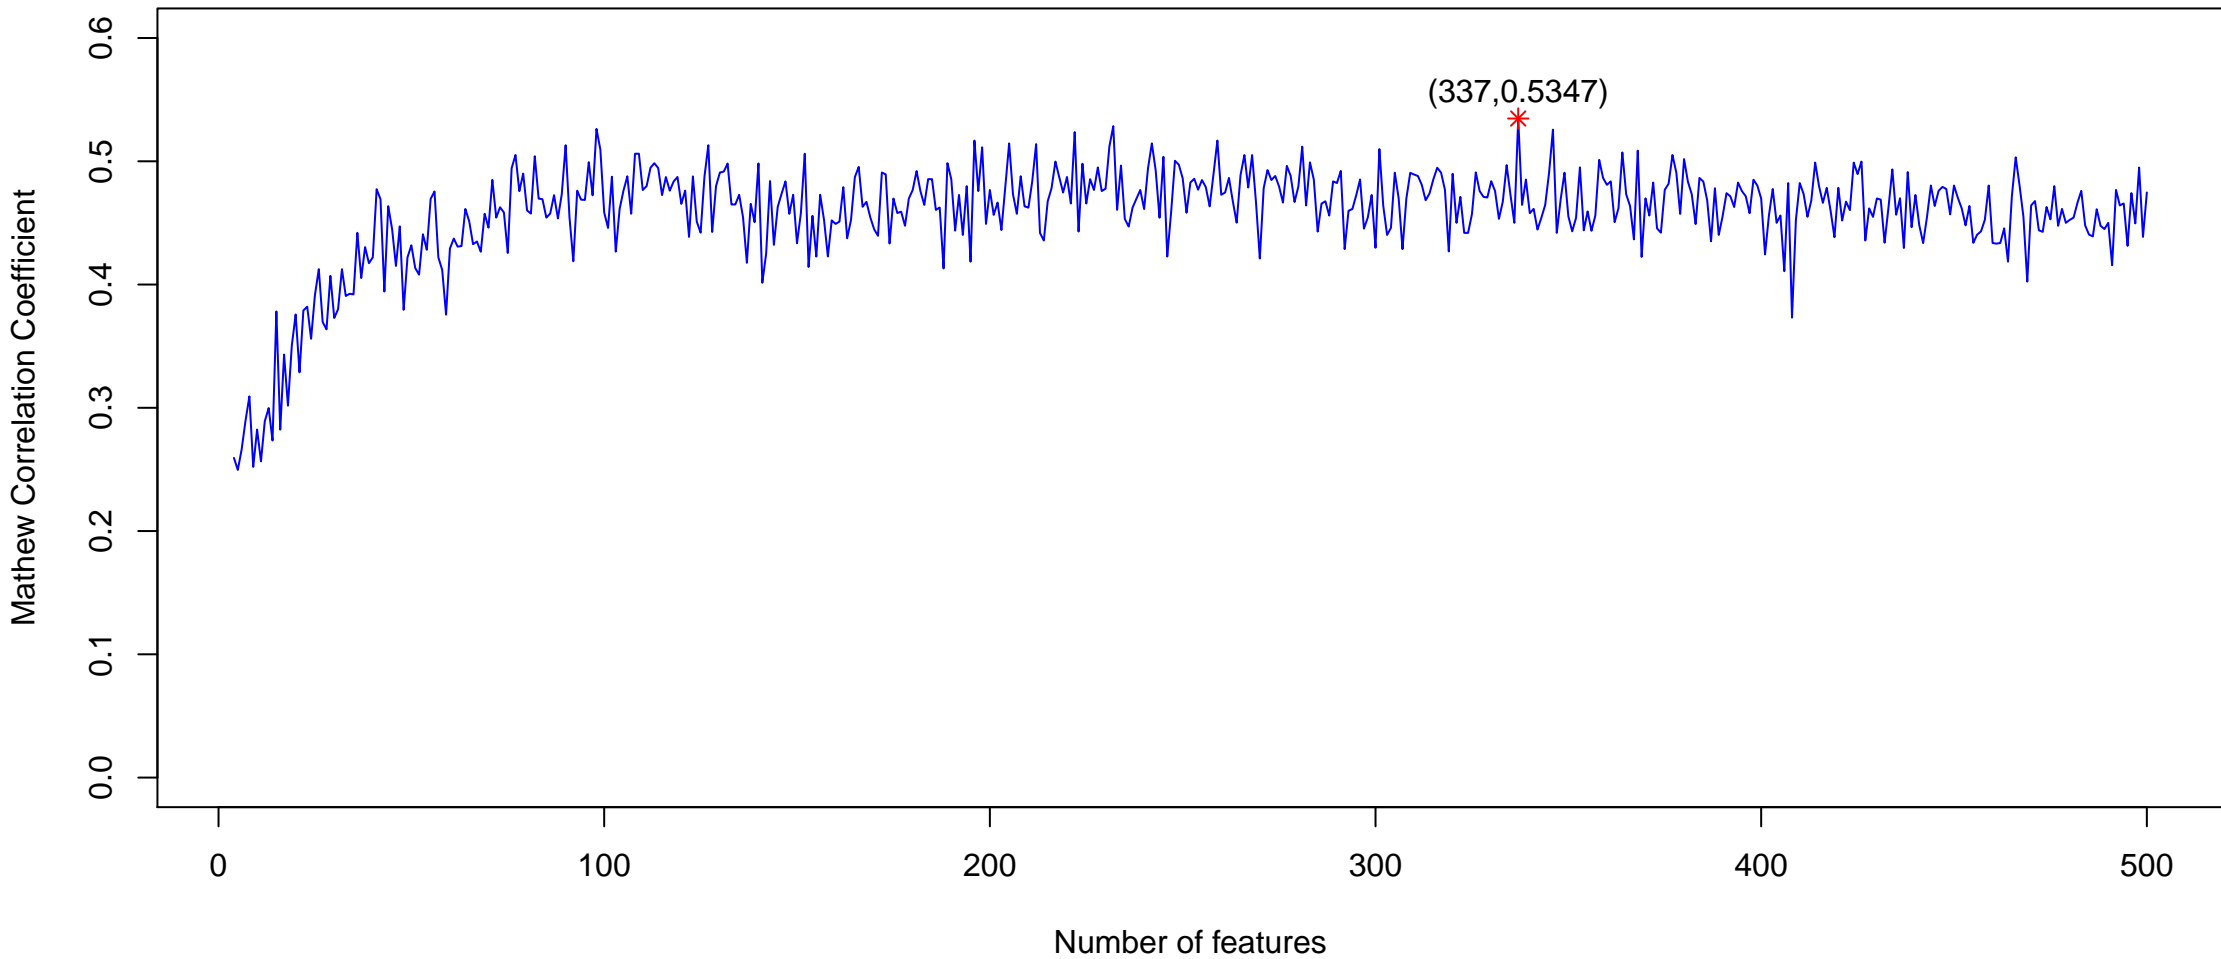

**Dataset 4**

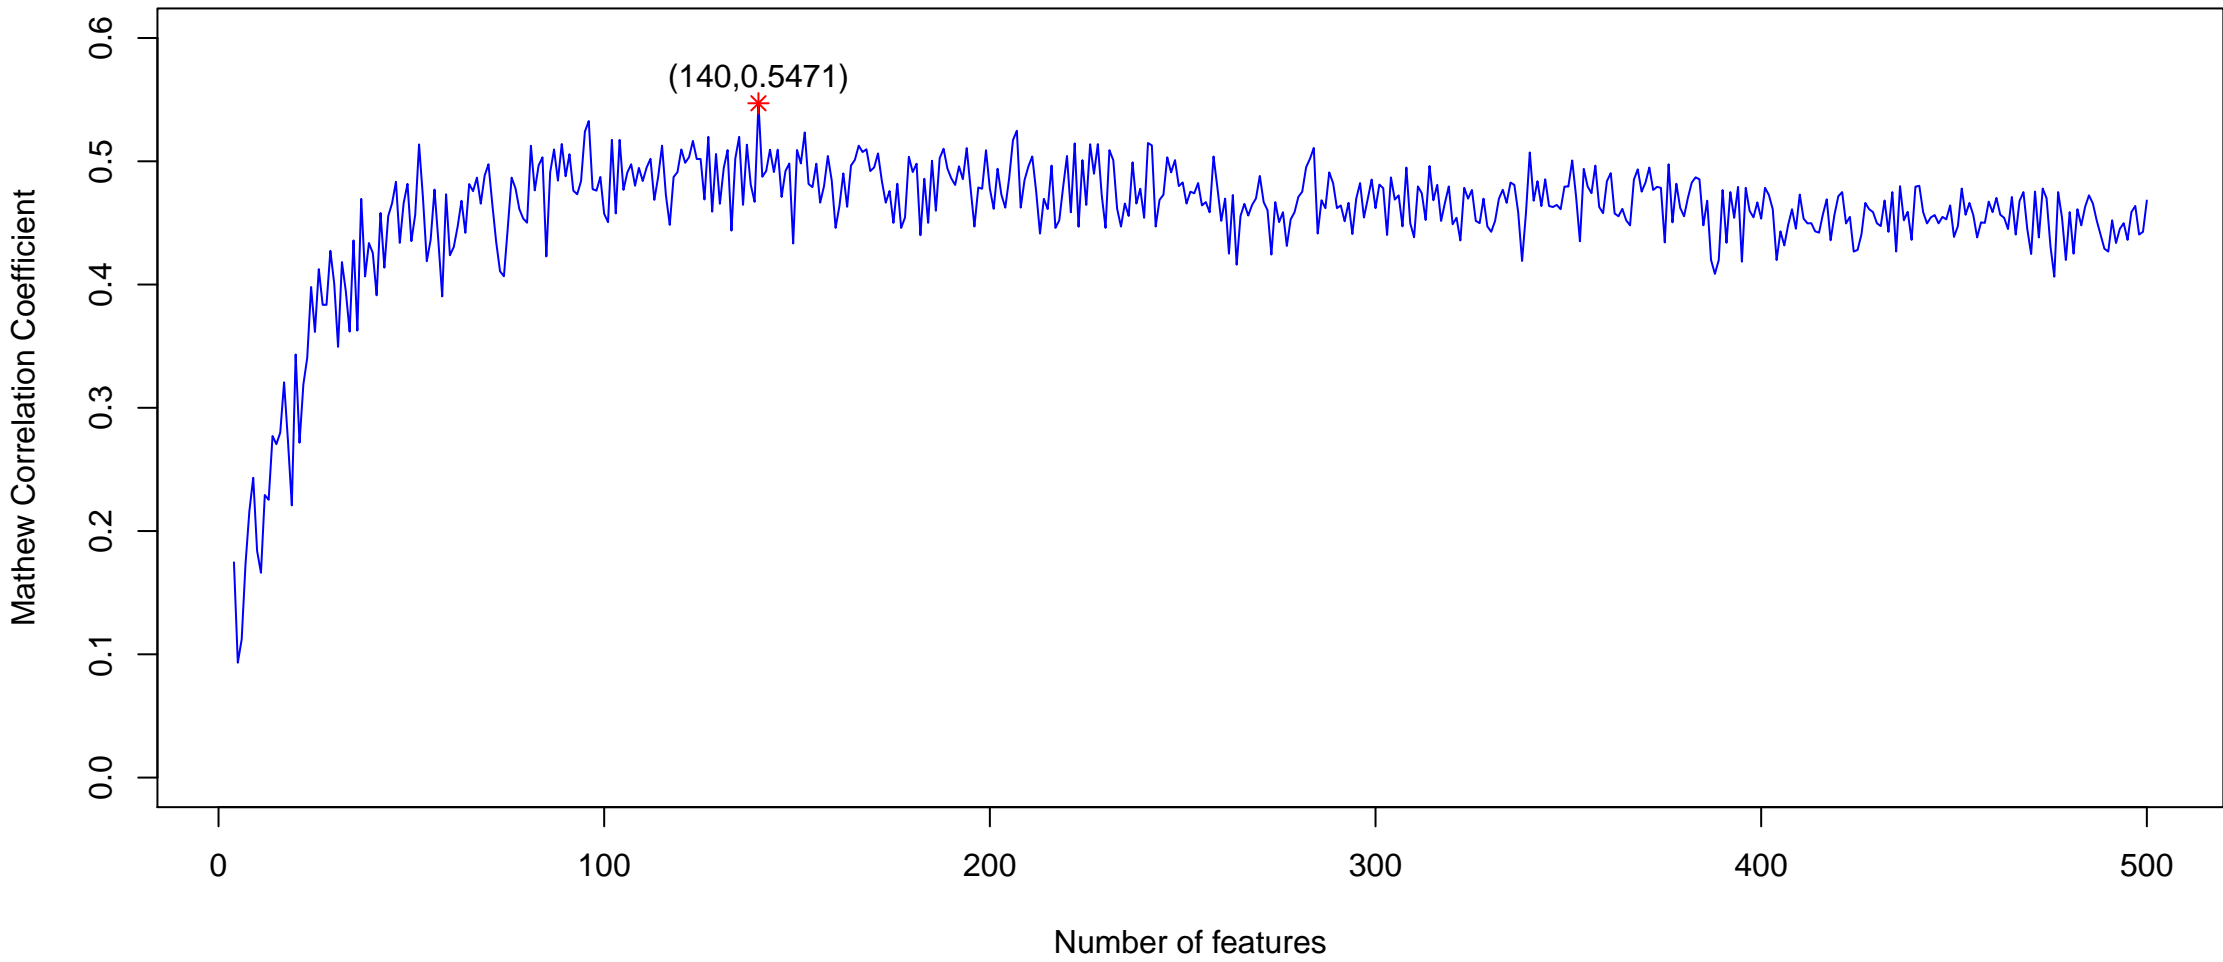

**Dataset 5**

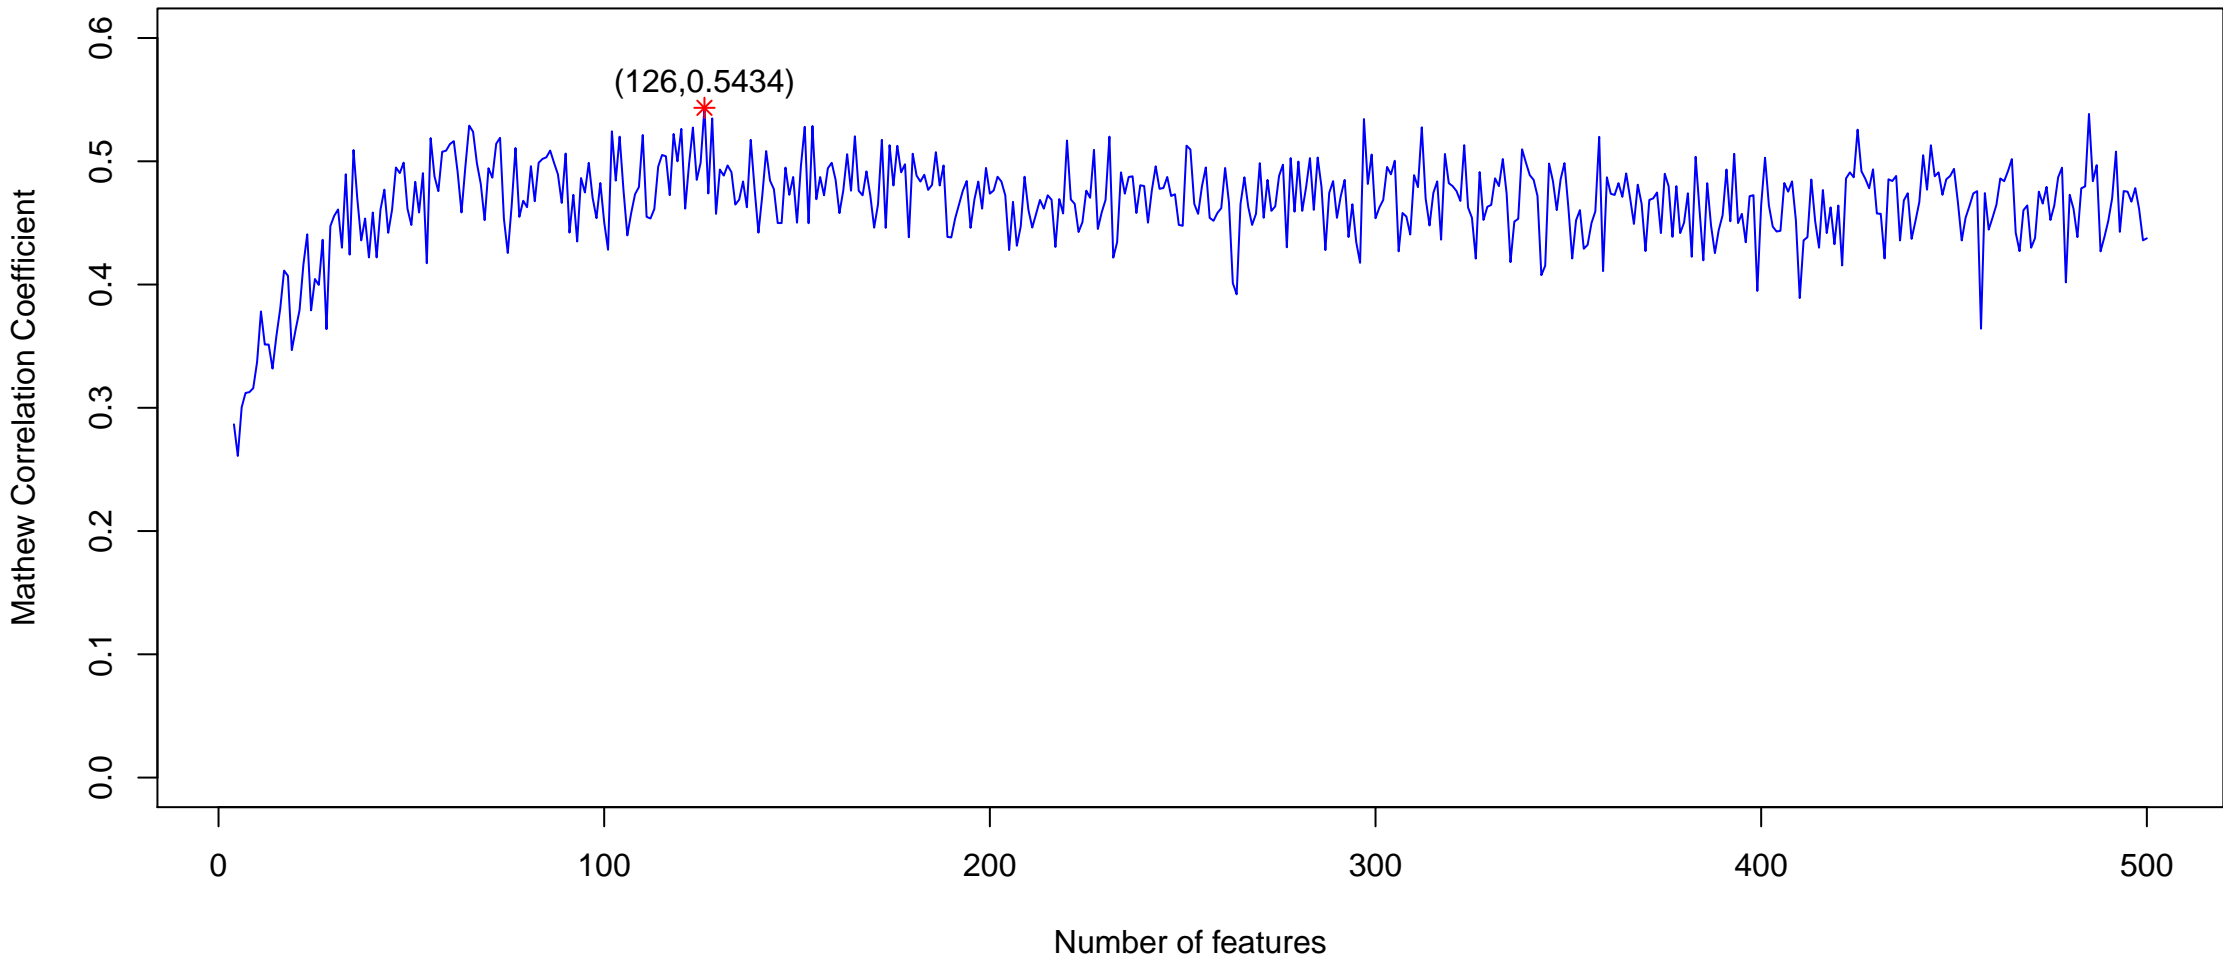

**Dataset 6**

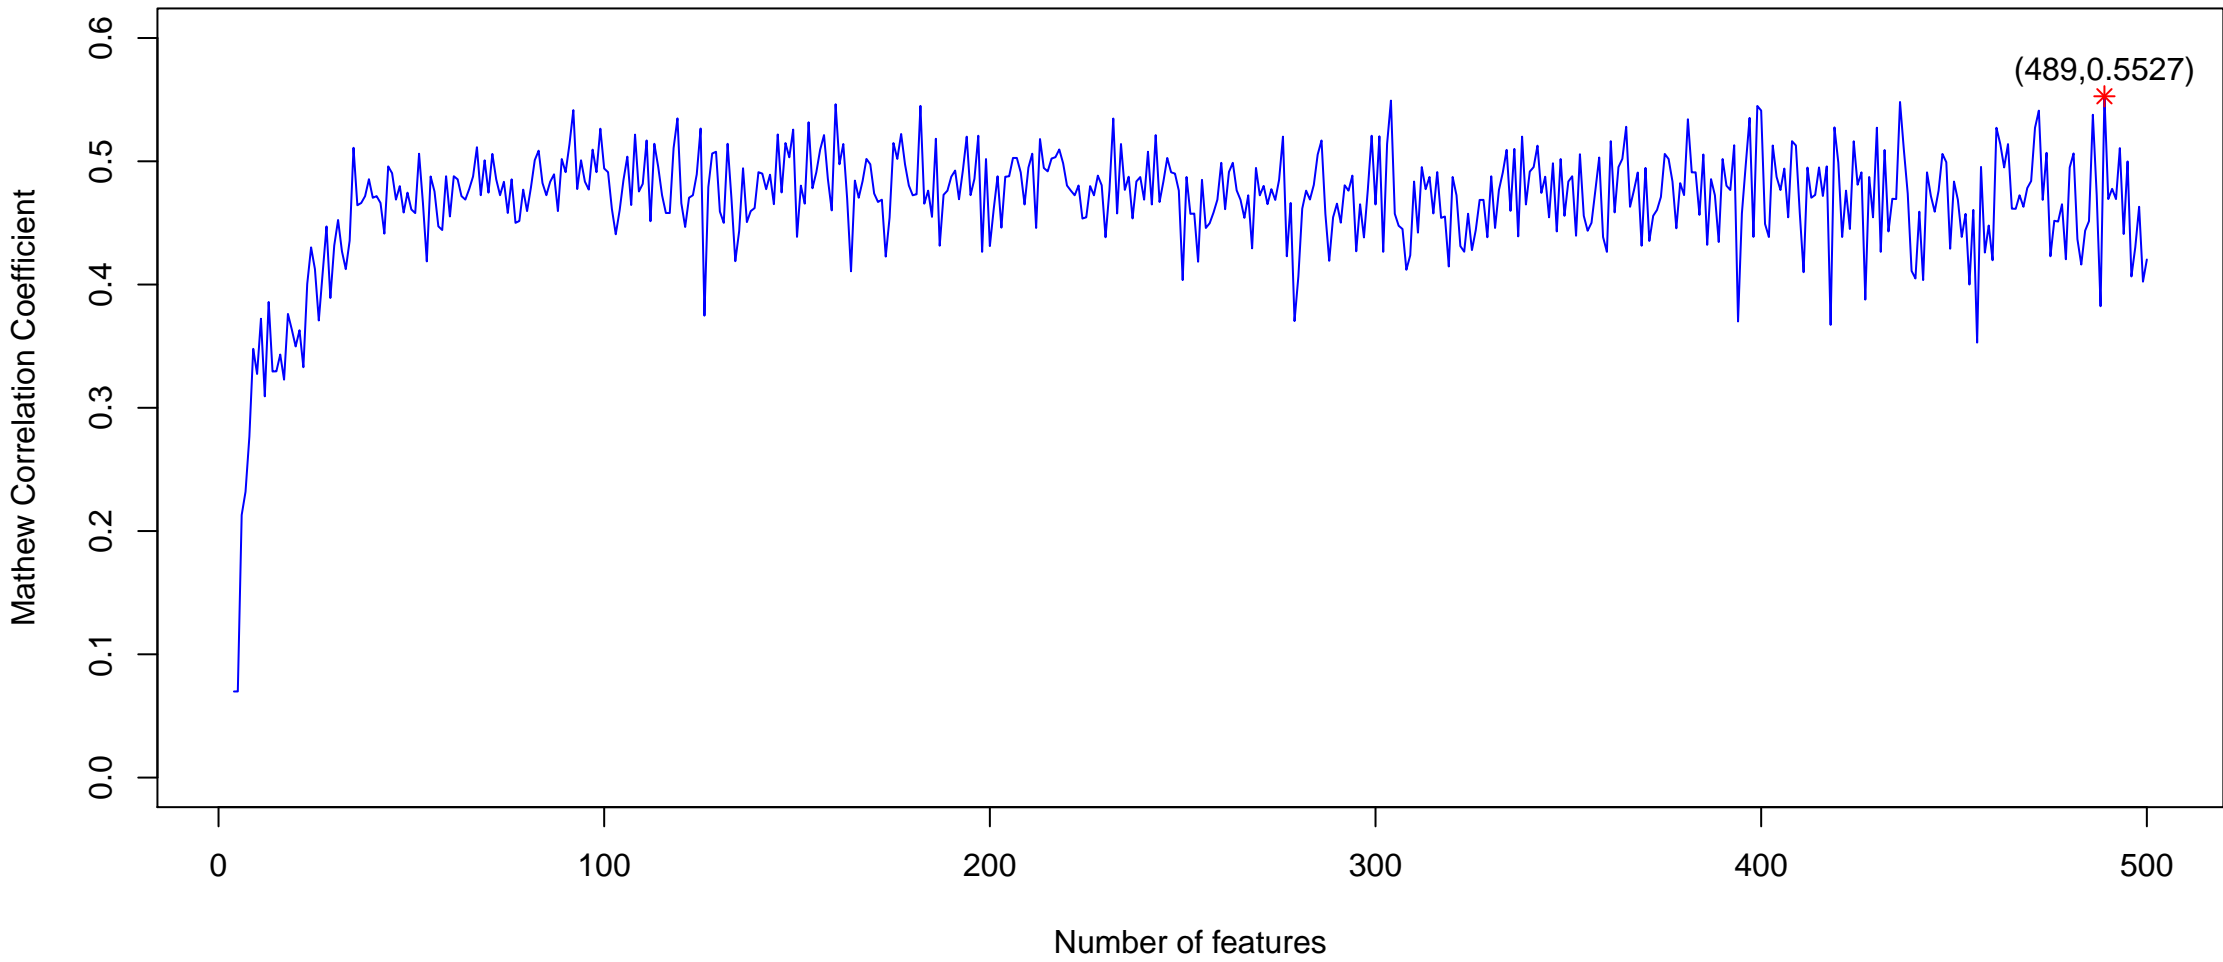

**Dataset 7**

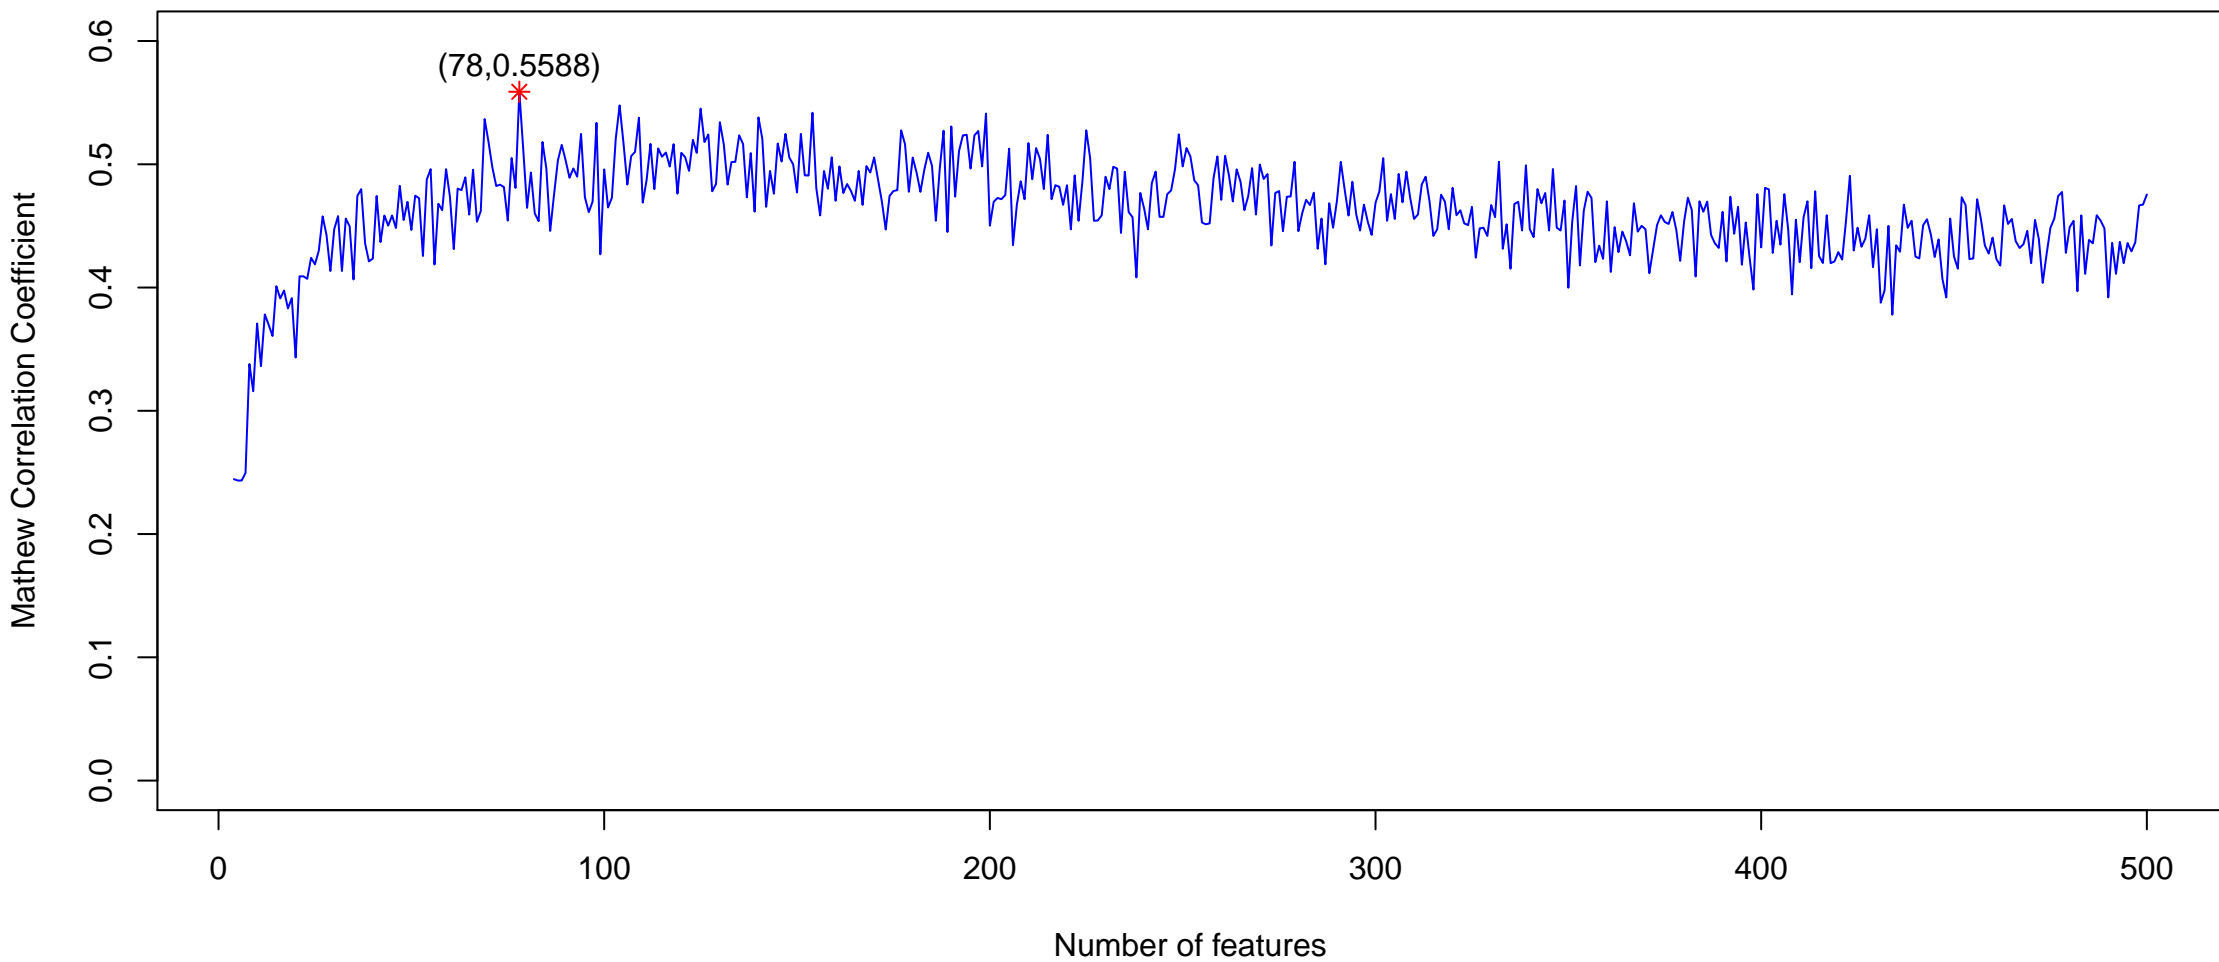

**Dataset 8**

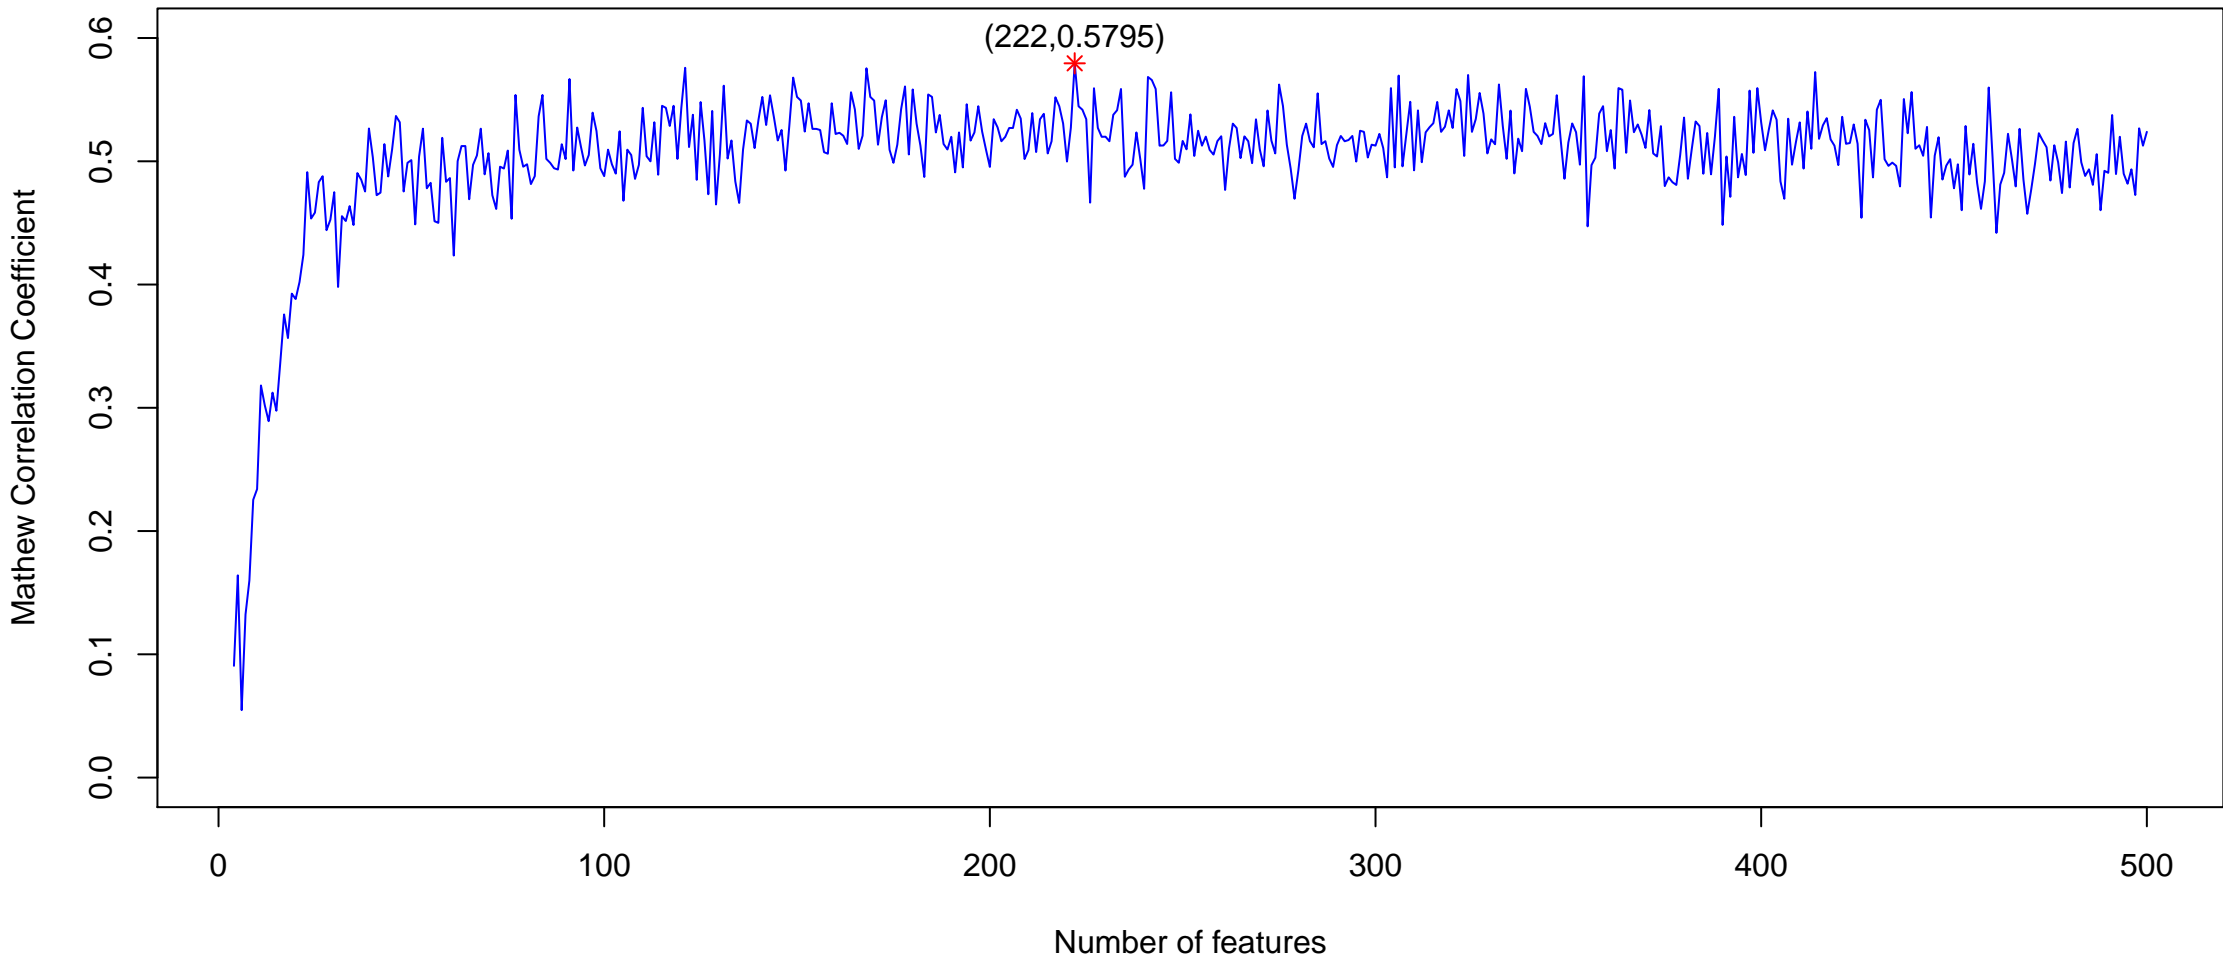

**Dataset 9**

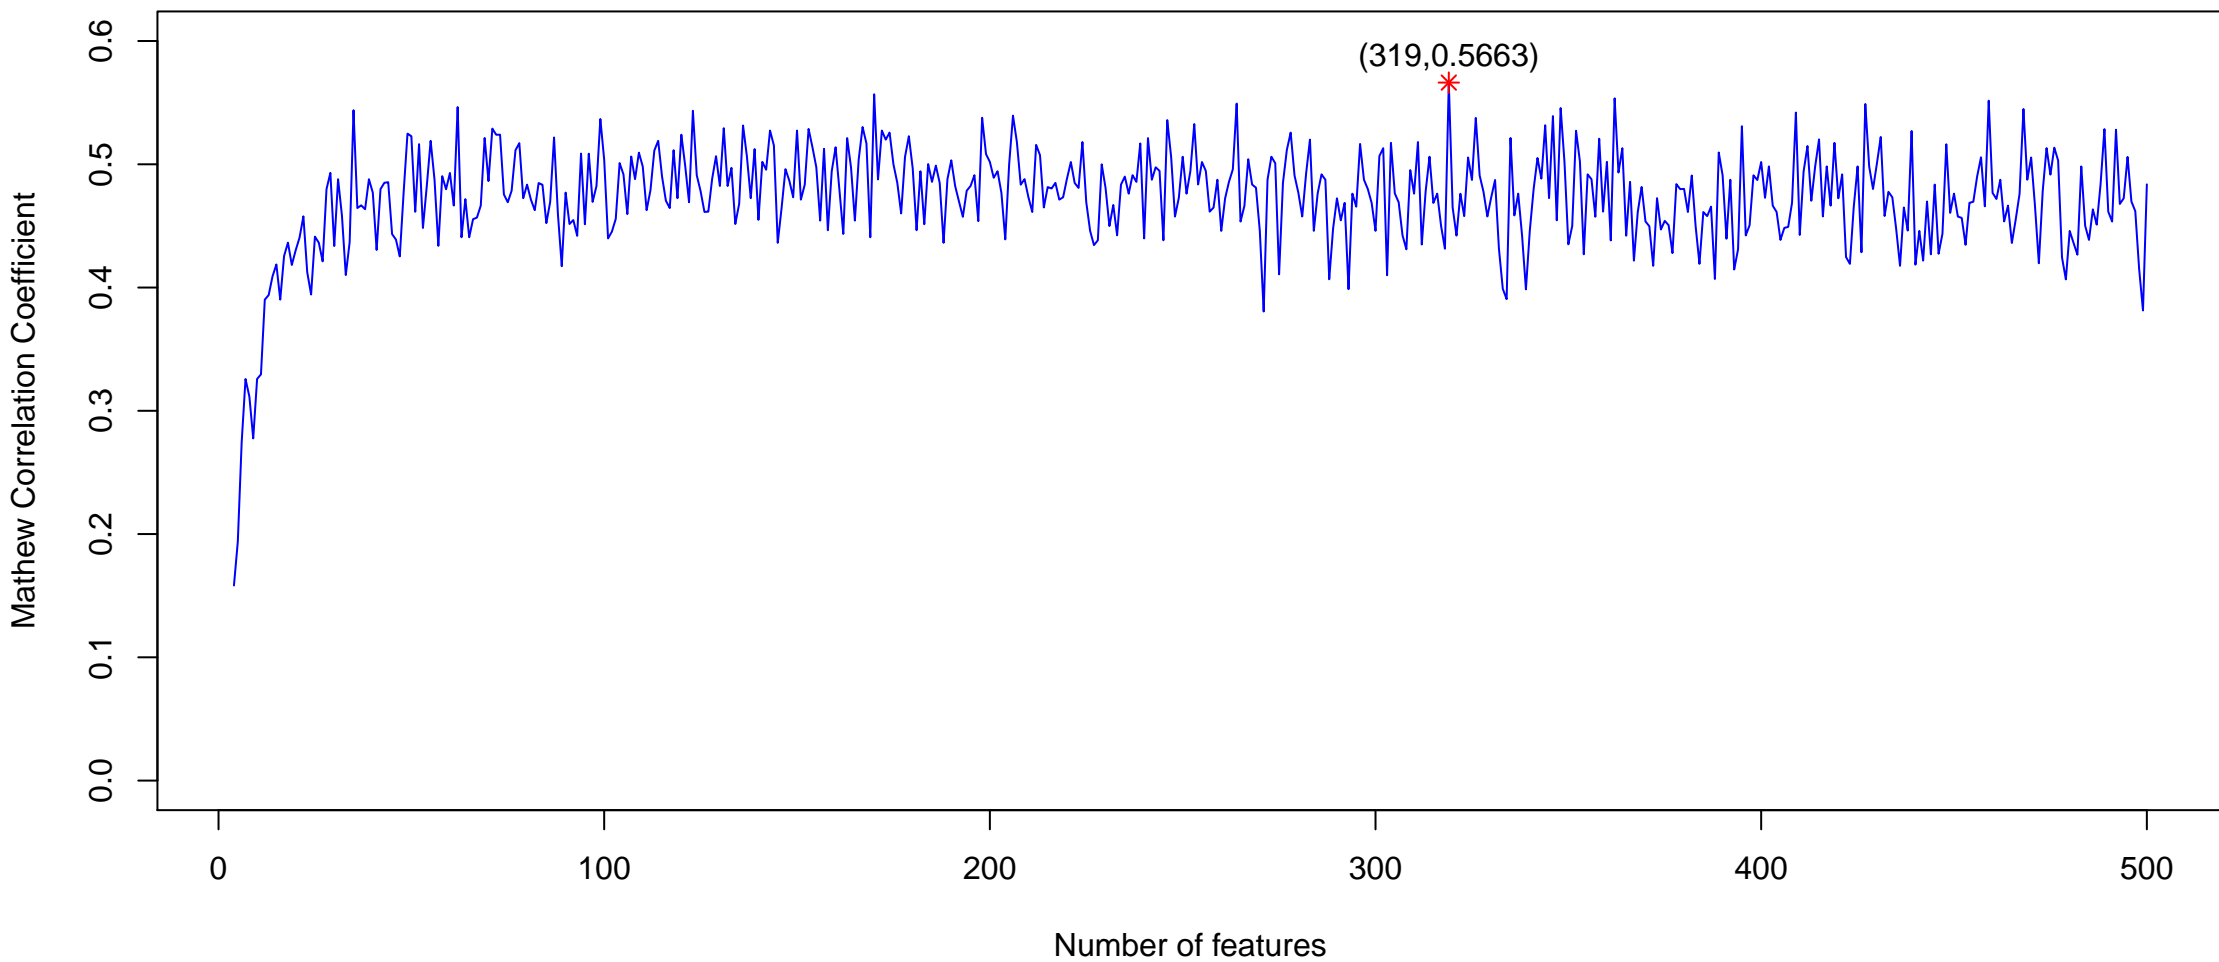



**Dataset 10**

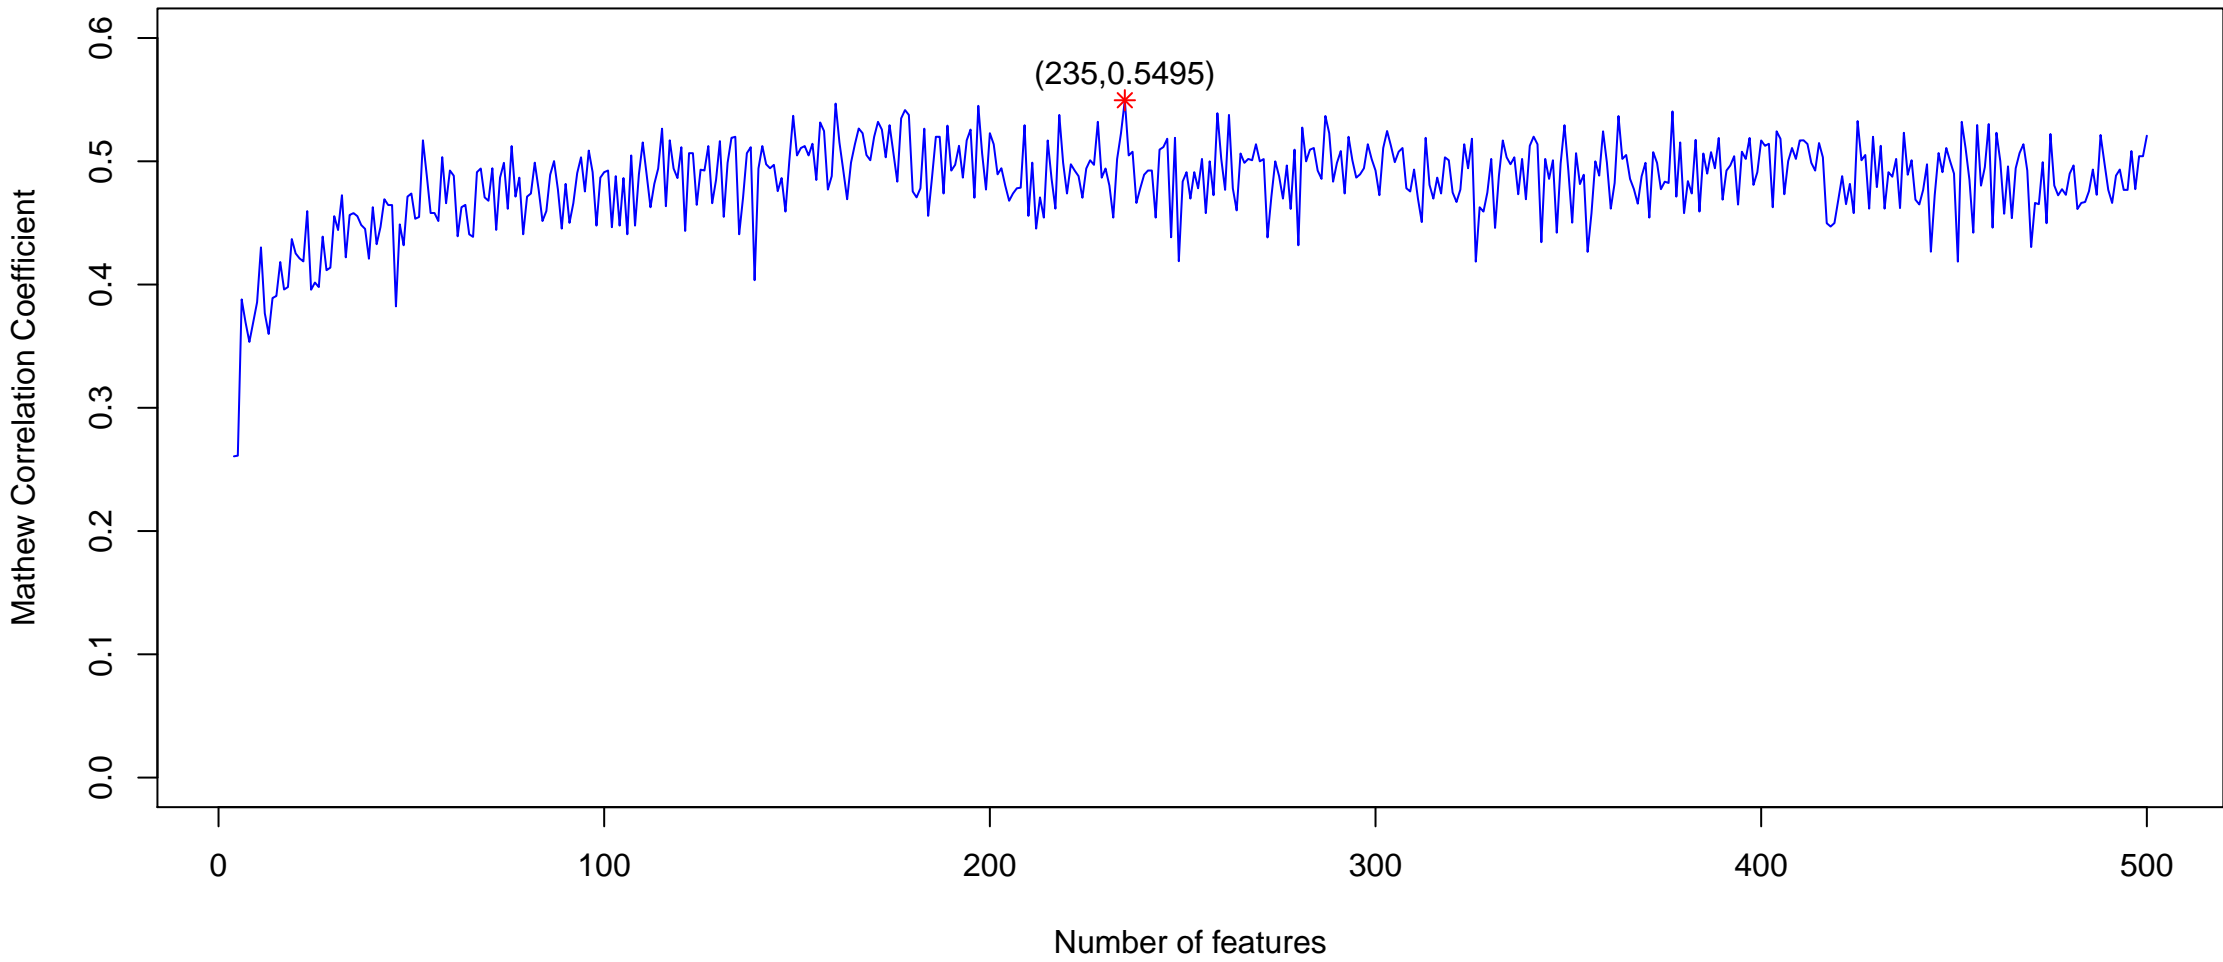

Supplement: f4 [file 304029.f4.pdf]
