# Supplementary material for: Prediction and Analysis of Retinoblastoma Related Genes through Gene Ontology and KEGG
Source: Biomed Res Int. 2013 Aug 13;2013:304029. doi: 10.1155/2013/304029 (PMC3755425; doi:10.1155/2013/304029)
Supplement: Supplementary file 1 — Supplementary Material includes Supplementary S1: This file includes two sheets. The first one shows the differentially expressed genes in two previous RB studies and the 119 overlap RB genes. The second sheet shows all the positive samples and negative samples used in this study. The ration between positive and negative samples is 1:50. The corresponding Ensembl protein IDs were given. Supplementary S2: This file contains twenty sheets. For each dataset, there were two tables, of which one is MaxRel feature table ranked according to the relevance between the features and the class of the samples and the other one is the mRMR feature table ranked according to the redundancy and relevance to the features of the samples. Supplementary S3: The sensitivity (Sn), specificity (Sp), accuracy (Ac), Matthews's correlation coefficient (MCC) generated by each run of the IFS for each of the ten datasets. Supplementary S4: The final optimal 1069 features including 1061 GO terms and 8 KEGG pathways. Supplementary S5: IFS curves for the rest nine datasets. Supplementary S6: GO and KEGG enrichment result for 119 RB genes [file 304029.f1.xlsx]

## Sheet: 119_RB_genes
study 1:Identification of genes associated with tumorigenesis of retinoblastoma by microarray analysis
study 2:Differential gene expression profile of retinoblastoma compared to normal retina
study 1	study 2	overlap
A2BP1	A2M	AK5
AASS	AACS	AKAP12
ABCB6	AARS2	ARHGAP23
ABHD12B	ABCA8	ARL6IP6
ABI2	ABCB1	ATAD5
ABP1	ABCB10	BBX
ACADL	ABCG2	BICD1
ACO1	ABHD3	BRPF3
ACOT12	ABI3BP	BTN3A2
ACOT7	ABLIM1	C1S
ACSL4	ABR	C3
ACTR6	ACADSB	CAV1
ACTR8	ACAT2	CBX3
ADAL	ACBD6	CCNA2
ADAM12	ACLY	CD59
ADCY3	ACOX1	CDC25A
ADCY6	ACP1	CDCA8
ADK	ACSL5	CFH
ADNP	ACSS3	CGNL1
ADSSL1	ACVR2B	CHEK1
AFAP1L1	ADAP1	COL4A5
AFF3	ADARB1	CTDSPL2
AGA	ADCY2	CTNNA1
AHI1	ADD2	DBF4
AHR	ADD3	DCN
AK5	ADO	DCP2
AKAP12	ADSS	DPYD
AKAP9	AEN	EBF1
ALAS1	AGBL3	EGFR
ALDH7A1	AGBL5	ELL2
ALPK2	AHCTF1	EME1
AMMECR1L	AHCY	EP400NL
AMOTL1	AHCYL2	ERBB3
ANAPC13	AHNAK	ETV5
ANGEL1	AIF1	FADS1
ANK1	AIM1	FAM33A
ANK3	AK5	FEZ1
ANKH	AKAP12	FNBP4
ANKRD15	AKAP5	FRS2
ANKRD50	AKT3	GFPT1
ANXA5	ALDH1A3	GIT2
AP1GBP1	ALDH2	GPD2
APIP	ALDH6A1	GSN
APPBP2	ALG9	GTPBP1
APPL2	ALK	GULP1
AQP3	ALMS1	H2AFV
AQP7	ALOX5AP	HIC2
ARG2	ALPK1	HMGCR
ARHGAP23	AMH	ID2
ARHGAP8	AMIGO2	IGF2BP3
ARHGEF10	AMMECR1	INTS7
ARHGEF12	ANKLE2	IQWD1
ARIH1	ANKRD32	KIF15
ARL6IP6	ANKRD35	KLHDC5
ARMC1	ANKRD40	LATS2
ARMC4	ANLN	LOC284513
ARMS2	ANO10	LRCH2
ARPC1B	ANTXR1	LTBP2
ARPC5	ANXA11	MAML2
ASCIZ	ANXA4	MAPK8
ASH1L	ANXA7	MASTL
ATAD5	APBB1IP	MCAM
ATG10	APBB2	MCM4
ATM	API5	METTL7A
ATP2B2	APLP2	MGAT4A
ATP5S	APP	MIB1
ATP6V1A	ARAP2	MSH6
ATRNL1	ARHGAP1	MTF2
ATRX	ARHGAP11A	NDC80
ATXN2	ARHGAP18	NFE2L2
ATXN7L3	ARHGAP19	NIT2
BAG2	ARHGAP23	NNT
BAG5	ARHGAP24	NQO1
BAT2D1	ARHGAP28	NR2F2
BBS12	ARHGAP29	NUP153
BBX	ARHGEF3	ORC6L
BCAS2	ARHGEF6	OSBPL1A
BICD1	ARID2	PCMTD1
BMP1	ARID5B	PCSK5
BMP8B	ARL1	PDCD4
BMPR2	ARL17	PDE7A
BPTF	ARL4C	PDLIM5
BRE	ARL6IP6	PPM1A
BRPF3	ARSD	PPM1D
BTN3A2	ASAH1	RAB27B
C10orf18	ASF1B	RARRES1
C10orf32	ASPA	RBL1
C10orf46	ASPH	RNF138
C10orf72	ASPM	SATB1
C13orf34	ASRGL1	SLC12A7
C14orf159	ATAD2	SLC13A3
C14orf83	ATAD5	SLC20A1
C16orf70	ATIC	SLC35B4
C16orf72	ATL3	SLC7A2
C17orf63	ATMIN	SMARCC1
C17orf75	ATP10D	SPAG5
C17orf79	ATP2B4	STIL
C18orf21	ATP6V0E1	STMN2
C18orf22	ATP8A2	STX3
C18orf25	AURKA	SUZ12
C18orf8	AURKB	TFRC
C1GALT1C1	AVPI1	TOB1
C1RL	AZI2	TOLLIP
C1S	B3GNT2	TSC22D1
C1orf109	B3GNT9	TSC22D3
C1orf112	B4GALT2	TTF2
C1orf119	BAMBI	UHRF2
C1orf41	BARD1	USP34
C1orf57	BAT3	USP37
C1orf84	BAT4	USP46
C20orf23	BBX	VGLL3
C2orf13	BCAR3	WDR27
C2orf28	BCL6	WDR33
C2orf44	BCL9L	WEE1
C3	BCMSUNL	ZNF232
C4orf19	BCOR	ZNF318
C4orf29	BDH2	ZNF43
C4orf30	BDKRB1	ZNF551
C4orf34	BEND4	ZXDC
C5	BHLHB9
C5orf5	BICD1
C6orf12	BIRC5
C6orf155	BLM
C6orf184	BLMH
C6orf201	BLVRB
C6orf32	BMP2
C6orf62	BMPER
C6orf72	BNC2
C9orf102	BNIP2
C9orf46	BOC
C9orf6	BRCA1
C9orf61	BRD8
C9orf86	BRI3BP
C9orf93	BRPF3
CA14	BTF3L4
CACNA1C	BTG3
CALM1	BTN3A1
CALM2	BTN3A2
CAMK1D	BTN3A3
CAPN7	BUB1
CAPZA2	BUB1B
CARD14	BUB3
CAV1	BUD13
CBR4	BXDC2
CBX3	C10ORF119
CCBP2	C10ORF26
CCDC120	C10ORF72
CCDC93	C10ORF93
CCK	C11ORF30
CCL11	C11ORF82
CCL7	C12ORF24
CCNA2	C12ORF48
CCND1	C13ORF18
CD24	C13ORF27
CD302	C13ORF3
CD36	C13ORF34
CD58	C13ORF37
CD59	C14ORF106
CD82	C14ORF39
CDC25A	C15ORF23
CDC42BPA	C15ORF41
CDC42SE2	C15ORF52
CDCA8	C16ORF52
CDCP2	C16ORF59
CDK6	C16ORF75
CDK9	C16ORF84
CEBPG	C17ORF75
CENPC1	C17ORF85
CENTG2	C17ORF91
CEP110	C18ORF10
CEP63	C18ORF54
CERK	C18ORF55
CFDP1	C19ORF30
CFH	C19ORF66
CGNL1	C1GALT1
CHCHD7	C1ORF135
CHD2	C1ORF2
CHD6	C1ORF226
CHEK1	C1ORF230
CHFR	C1ORF31
CHKA	C1ORF71
CHMP4B	C1ORF74
CHMP5	C1ORF77
CHPF	C1ORF95
CHRAC1	C1S
CHRNA5	C2
CHURC1	C21ORF45
CIDEB	C21ORF58
CLCN3	C21ORF66
CLCN6	C2ORF43
CLPX	C2ORF44
CLTA	C3
CMBL	C3AR1
CNGB3	C3ORF58
CNNM2	C3ORF64
CNP	C4A
CNTN5	C4ORF27
CNTROB	C4ORF43
COG7	C4ORF46
COL18A1	C5ORF23
COL4A1	C5ORF34
COL4A3	C5ORF4
COL4A5	C5ORF41
COL5A1	C5ORF56
COQ9	C6ORF125
COX15	C6ORF134
COX18	C6ORF173
COX4I1	C6ORF192
COX4NB	C7ORF10
COX6A1	C7ORF13
CPEB2	C7ORF42
CR1	C8ORF34
CREB3L1	C8ORF42
CREBBP	C8ORF46
CRHBP	C9ORF100
CRLS1	C9ORF140
CRSP6	C9ORF30
CRY1	C9ORF40
CSNK1G3	C9ORF61
CSRP2	CABLES2
CSTA	CACNA2D3
CSTB	CACNB3
CTDSPL2	CACYBP
CTH	CADPS
CTNNA1	CALM3
CTNND2	CANX
CTSS	CAPN3
CTTNBP2	CAPN5
CUL4B	CASC5
CXorf36	CASK
CYB5A	CASP2
CYBB	CASP6
CYP4A11	CASP8AP2
DAAM1	CAST
DAPK1	CAV1
DARS	CAV2
DBF4	CBLN1
DCN	CBX1
DCP2	CBX2
DDR1	CBX3
DEAF1	CBX5
DEGS1	CBX6
DENND4A	CCDC112
DIP2B	CCDC138
DIRAS1	CCDC15
DKC1	CCDC21
DKFZP434A0131	CCDC74A
DKFZP564J0863	CCDC77
DKFZP564J102	CCDC80
DKFZp313A2432	CCDC82
DKFZp547H025	CCDC88A
DKFZp586I1420	CCHCR1
DKFZp667M2411	CCNA1
DMXL1	CCNA2
DNAJB1	CCNB1
DNAJC19	CCNB2
DNASE1	CCND2
DOCK10	CCNE1
DOCK7	CCNE2
DPH2	CCNF
DPH3	CCNG1
DPP8	CCNL2
DPYD	CCNT2
DSCR3	CCR1
DTNA	CCT2
DTWD1	CCT3
DTWD2	CCT5
DUSP18	CCT6A
DYNC1I2	CCT8
EAF1	CD164
EBF1	CD44
ECHDC3	CD47
EDG2	CD59
EEF1A1	CD74
EFNA5	CDC14B
EGFR	CDC2
EGLN1	CDC20
EIF1AY	CDC23
EIF2AK4	CDC25A
EIF2C4	CDC25C
EIF2S1	CDC45L
EIF3S9	CDC5L
EIF4H	CDC6
ELL2	CDC7
ELOVL7	CDCA2
ELP3	CDCA3
EME1	CDCA4
EMP2	CDCA5
EP300	CDCA7
EP400NL	CDCA7L
EPB41L1	CDCA8
EPB41L4A	CDK5R1
EPS15	CDK5RAP3
ERBB3	CDK8
ERC1	CDKL3
ERGIC3	CDKN2C
ERLIN2	CDKN3
ETV5	CDO1
EVC	CDR2
EXOSC6	CDT1
FADS1	CEBPD
FAM107B	CEL
FAM108B1	CENPA
FAM109A	CENPE
FAM112B	CENPF
FAM122A	CENPH
FAM33A	CENPI
FAM36A	CENPJ
FAM40B	CENPK
FAM49A	CENPL
FAM49B	CENPM
FAM53C	CENPN
FAM59A	CENPO
FAM62B	CENPV
FAM79A	CEP135
FAM89A	CEP152
FANCC	CEP170
FARP2	CEP192
FBF1	CEP55
FBL	CEP57
FBLIM1	CEP72
FBLN5	CEP76
FBN2	CEP78
FBXL16	CEP97
FBXL7	CFC1
FBXO18	CFH
FBXO30	CFI
FBXO31	CFLAR
FBXO32	CGNL1
FBXO33	CHADL
FBXO4	CHAF1A
FEZ1	CHAF1B
FGL2	CHD1L
FKBP14	CHEK1
FKBP9	CHIC1
FLJ11710	CHML
FLJ20294	CHMP2B
FLJ20489	CHN2
FLJ22028	CHP
FLJ32810	CIB1
FLJ37638	CISD2
FLJ38973	CIT
FLJ39575	CITED2
FLJ39739	CKAP2
FLJ43080	CKAP2L
FLJ45300	CKAP5
FLJ46906	CKS2
FLJ90650	CLDN10
FMOD	CLGN
FNBP4	CLIC5
FNDC4	CLIP1
FOXP1	CLK2
FRMD4A	CLN5
FRS2	CLN6
FRYL	CLU
FUS	CMYA5
FXR2	CNIH4
GAB2	CNKSR3
GALNT6	CNN2
GART	CNOT10
GATAD1	CNTN3
GBP5	CNTN4
GCM1	CNTNAP2
GCM2	COCH
GDPD3	COIL
GFM2	COL4A5
GFPT1	COL9A3
GGTL3	COLEC12
GIT2	COPS3
GKN1	COPZ2
GLMN	CORO2A
GLT8D3	COX5B
GM2A	COX7A1
GNG12	CP
GNL3L	CP110
GNPTAB	CPNE8
GPATCH2	CPSF3
GPD2	CPSF6
GPLD1	CPT1A
GPR126	CREB3L2
GPSM1	CREB3L4
GRHL1	CREBZF
GRID2	CRIM1
GRWD1	CRISPLD2
GSN	CRTAP
GSR	CRY2
GSTA1	CRYAB
GSTM2	CRYL1
GTF2A2	CSDA
GTF3A	CSE1L
GTF3C3	CSF1
GTPBP1	CST3
GULP1	CSTF3
GYPB	CTA-221G9.4
H2AFV	CTDSPL2
H6PD	CTNNA1
HARS2	CTNND1
HAS3	CTPS
HD	CTSB
HDLBP	CTSK
HERPUD2	CTSO
HIC2	CUGBP1
HIST1H2AC	CUGBP2
HIST1H4J	CX3CR1
HLA-DPB1	CXCL12
HLA-DQB1	CXCR4
HMGCR	CXORF50B
HN1L	CYB5R3
HNRPA0	CYBRD1
HNRPA3	CYFIP1
HNRPH3	CYGB
HP1BP3	CYLD
HPCAL4	CYP27B1
HPS5	CYP39A1
HSD17B7	CYP4V2
HSPA14	CYP4X1
HTRA3	CYTH3
IARS2	DAB2
ID2	DACT1
IDS	DAP3
IFI44L	DARS2
IFNAR2	DAXX
IGF1R	DAZAP2
IGF2BP2	DBC1
IGF2BP3	DBF4
IL1RL1	DCK
IL6R	DCLRE1B
ILKAP	DCN
IMMP2L	DCP2
INTS4	DCT
INTS7	DDB2
IQCG	DDR2
IQWD1	DDX11
IREB2	DDX18
IRF2	DDX39
ISG20L1	DDX46
ISLR2	DDX50
ITFG1	DDX55
ITGA2	DDX60
ITGA8	DEK
IVD	DEM1
JMJD1C	DEPDC1
JMJD2B	DEPDC1B
JRK	DERA
KCNB1	DGAT2
KCNJ3	DHFR
KIAA0241	DHRS13
KIAA0415	DHRS3
KIAA0423	DHX15
KIAA0495	DHX40
KIAA0701	DHX9
KIAA0802	DIAPH3
KIAA0892	DKFZP434L187
KIAA1109	DKFZP564O0823
KIAA1432	DLAT
KIAA1648	DLC1
KIAA1715	DLEU2
KIAA1815	DLGAP5
KIF15	DMD
KIF21B	DMXL2
KLF3	DNA2
KLHDC2	DNAH14
KLHDC5	DNAJB5
KLHL25	DNAJC9
KLHL5	DNMT1
KREMEN1	DNMT3B
KRT23	DOCK1
KRTAP4-7	DOCK5
L3MBTL4	DOK5
LAMB1	DOM3Z
LARP4	DONSON
LATS2	DOT1L
LBP	DPP10
LETM1	DPP4
LHX2	DPYD
LIMD1	DSCC1
LMO2	DSCR6
LOC126917	DSN1
LOC134145	DSP
LOC150568	DTL
LOC151878	DUSP12
LOC152485	DUSP4
LOC257407	DUT
LOC283624	E2F1
LOC284352	E2F2
LOC284513	E2F3
LOC339290	E2F7
LOC339745	E2F8
LOC401152	EBF1
LOC401577	EBP
LOC440040	ECT2
LOC440498	EDNRB
LOC493869	EED
LOC51057	EFCAB2
LOC89944	EFEMP1
LOC91316	EGFL6
LOXL1	EGFLAM
LPIN1	EGFR
LPIN2	EHMT2
LPP	EIF2S2
LRCH2	ELAVL1
LRP8	ELAVL2
LRRC31	ELL2
LRRC57	ELOVL2
LRRC58	ELOVL6
LRRC8A	EME1
LRRFIP2	ENAH
LSM5	ENO3
LSP1	ENOPH1
LST1	ENPP2
LTBP2	ENPP5
LTF	ENTPD3
LTV1	EP400NL
LYST	EPAS1
LZIC	EPDR1
MAK	ERBB2
MAML2	ERBB3
MAP3K4	ERCC6L
MAP3K6	ERO1L
MAP3K7IP2	ESPL1
MAP4K4	ESR1
MAP7D3	ETNK1
MAPK8	ETV5
MAPK9	EVI5
MAPKBP1	EXO1
MARS2	EXOSC9
MASTL	EYA2
MBOAT1	EZH2
MBOAT5	F13A1
MBTD1	F2RL2
MCAM	F3
MCM4	F8
MCOLN3	FADS1
MDS1	FADS3
MED4	FAF1
MEF2A	FAM100B
MEGF8	FAM102A
METTL2B	FAM102B
METTL7A	FAM110A
MFN1	FAM110C
MFSD8	FAM111B
MGAT4A	FAM117B
MGC3207	FAM129A
MGC3260	FAM131B
MGC71993	FAM134A
MGEA5	FAM136A
MIB1	FAM13A
MINK1	FAM13C
MINPP1	FAM19A2
MIRH1	FAM19A4
MLL5	FAM20B
MLYCD	FAM24B
MME	FAM33A
MMP15	FAM46A
MNAT1	FAM50B
MOBK1B	FAM53B
MOBP	FAM54A
MOCS3	FAM60A
MON1B	FAM64A
MPI	FAM70A
MPP5	FAM76B
MRPS14	FAM83D
MRPS18C	FAM83H
MRPS27	FANCA
MRPS9	FANCD2
MRTO4	FANCE
MSH6	FANCG
MSL-1	FANCI
MSL2L1	FANCL
MST101	FASTKD1
MTCH2	FAT4
MTERFD2	FBN1
MTF2	FBXL20
MTM1	FBXO11
MTMR3	FBXO2
MTMR9	FBXO43
MTR	FBXO45
MYL6	FBXO5
MYO1D	FDPS
MYOZ3	FEN1
MYT1L	FEZ1
NANS	FGFR1
NAPE-PLD	FHL1
NCAN	FIGNL1
NCF2	FKBP5
NCOR2	FKBPL
NDC80	FLJ31485
NDUFB5	FLJ35776
NDUFS7	FLJ36166
NEDD4L	FLJ41603
NEURL	FLJ46875
NFASC	FLT1
NFE2L2	FLVCR1
NFE2L3	FMN2
NFKB1	FMO2
NGLY1	FNBP4
NIT1	FNDC3B
NIT2	FOXM1
NKIRAS2	FOXN4
NME2	FRAG1
NNT	FRAS1
NOD1	FRS2
NOLC1	FSD1
NOM1	FSTL1
NPAL1	FTH1
NPAL3	FTSJ2
NPAS2	FTSJD2
NPAS3	FUBP1
NQO1	FUSIP1
NR2F2	FYB
NSMCE2	FYCO1
NSUN4	G2E3
NT5M	GAB1
NTRK2	GABBR1
NUP153	GABRB2
OIT3	GAD1
OLFM1	GALNT10
ORC4L	GALNT11
ORC6L	GALNT12
OSBPL1A	GALNTL2
OTUD3	GAS2L3
OTUD7B	GAS7
P2RX7	GCAT
P4HB	GCLC
PABPC4	GDAP1L1
PAFAH1B1	GEN1
PAK6	GFPT1
PANK1	GGCT
PANK3	GGH
PAPPA	GHR
PAR1	GIMAP5
PARD3	GINS1
PARP4	GINS2
PAX8	GINS3
PC	GIT2
PCBP2	GJC1
PCDHGC3	GKAP1
PCF11	GLCCI1
PCMTD1	GLDN
PCSK5	GLG1
PCSK7	GLI3
PCYOX1	GLIPR1
PCYOX1L	GLUL
PDCD4	GMNN
PDCD5	GMPS
PDE11A	GNAS
PDE4DIP	GNAT2
PDE7A	GNG4
PDE8A	GNG7
PDIA3	GNS
PDLIM4	GOLGA8A
PDLIM5	GPC2
PDPK1	GPD1L
PELO	GPD2
PEX11A	GPR124
PEX14	GPR137C
PFAAP5	GPR157
PGCP	GPR177
PGRMC2	GPR180
PHC2	GPR19
PHF21A	GPR89A
PHKA1	GPR89B
PHKA2	GPRC5B
PICALM	GPSM2
PIGK	GPX8
PIGX	GRINL1A
PIK3C3	GSN
PIK3R2	GSTK1
PIP3-E	GSTM3
PIPOX	GSTM5
PLAC4	GSTO2
PLCB1	GTPBP1
PLCD1	GTPBP2
PLCG2	GTSE1
PLEKHM2	GUCY1A3
PLGLB1	GUCY1B3
PLXDC2	GULP1
PNCK	H2AFV
POFUT1	H2AFY
POLR2A	H2AFZ
POLR2K	HADH
POMT1	HADHB
POT1	HAUS1
POU2F2	HAUS3
PPARG	HAUS6
PPM1A	HCN3
PPM1D	HDAC2
PPP1R10	HDC
PPP1R12A	HELLS
PPP1R8	HEPH
PPP1R9B	HERC6
PPP2R5D	HES1
PPP6C	HIBADH
PPTC7	HIC2
PRDM4	HIST1H1C
PRDX2	HIST1H2BD
PRG2	HIST1H2BI
PRKACA	HIST4H4
PRKCD	HIVEP2
PRPF40A	HJURP
PRPSAP1	HLA-DMA
PSD3	HLA-DMB
PSENEN	HLA-DRA
PSG3	HLA-DRB1
PSMA2	HLA-E
PSMB2	HLF
PSMC3	HLTF
PSMD12	HMG4L
PSMD7	HMGA1
PSRC1	HMGB2
PTDSS1	HMGB3
PTHR1	HMGCLL1
PTK2	HMGCR
PTPN1	HMGN2
PTPN12	HMMR
PVRL4	HN1
RAB1A	HNMT
RAB27B	HNRNPA1
RAB2A	HNRNPA2B1
RAB2B	HNRNPA3
RAB6A	HNRNPAB
RABL3	HNRNPH3
RAF1	HNRNPM
RAG1AP1	HNRNPR
RAPGEF3	HNRNPU
RARRES1	HPCAL1
RASA2	HRASLS
RASAL2	HS6ST3
RBL1	HSD17B12
RBM18	HSD17B14
RBM35B	HSF2
RBM39	HSPA13
RBM4	HSPA4L
RBM5	HSPB8
RBP1	HSPD1
RCHY1	HTRA1
REEP1	HUNK
RGPD8	HVCN1
RGS5	HYLS1
RHAG	IARS
RHBDD1	ID2
RHCE	IER3IP1
RHOA	IFIH1
RHOBTB3	IFIT1
RIC3	IFIT2
RIOK3	IFIT3
RNF13	IFIT5
RNF138	IFITM1
RNF149	IFITM2
RNF152	IFITM3
RNF19	IFT80
ROCK1	IFT81
ROD1	IGDCC3
RPL10A	IGDCC4
RPL21	IGF1
RPL37	IGF2
RPL38	IGF2BP3
RPL41	IGFBP5
RPLP1	IGFBPL1
RPS2	IGSF21
RPS23	IGSF3
RPS6KA3	IL13RA1
RRAGD	IL17D
RSF1	IL1R1
RUFY2	IL6ST
RUTBC2	ILF3
S100A6	IMPACT
S100A8	INPP5A
SAMHD1	INSM1
SAR1B	INTS7
SATB1	IPO5
SC4MOL	IPO7
SCARB1	IPO9
SCYE1	IQCB1
SDC1	IQCK
SDC2	IQWD1
SDK1	ISL2
SEC61A1	ITGAL
SEC63	ITGB1
SEPT4	ITGB4
SEPT5	ITGB5
SEPT7	ITGB8
SERPINB1	ITIH5
SERPINC1	ITM2A
SETD2	ITM2B
SF3B3	ITPR1
SFRS2IP	IVNS1ABP
SGEF	JAG1
SGPL1	JARID2
SGTB	JPH1
SH3GLB1	JUB
SH3TC2	KANK4
SHROOM4	KAT2B
SIAE	KATNAL1
SKIV2L2	KCMF1
SLC12A7	KCNAB1
SLC13A3	KCNB2
SLC16A1	KCNE3
SLC20A1	KCNJ2
SLC25A12	KCNQ1
SLC25A42	KCNQ2
SLC31A1	KCNQ4
SLC35B4	KCTD12
SLC35F2	KCTD14
SLC38A2	KCTD3
SLC39A14	KDELC1
SLC3A1	KDM1
SLC40A1	KDM2B
SLC7A2	KDR
SLFN5	KHDRBS1
SMAD4	KIAA0101
SMARCA2	KIAA0114
SMARCC1	KIAA0406
SMCR7L	KIAA0494
SMEK2	KIAA0564
SNCA	KIAA0831
SOCS7	KIAA0895
SOD1	KIAA1128
SON	KIAA1211
SP1	KIAA1217
SPAG5	KIAA1462
SPAG9	KIAA1524
SPATA21	KIAA1586
SPECC1	KIAA1731
SPECC1L	KIAA1958
SPRY3	KIAA2022
SS18L1	KIF11
SSH1	KIF14
ST3GAL2	KIF15
ST3GAL3	KIF18A
STAG2	KIF18B
STAM	KIF20A
STIL	KIF20B
STIM1	KIF23
STK38	KIF2A
STK4	KIF2C
STMN2	KIF4A
STRN4	KIF7
STX3	KIFC1
STX5A	KIT
STXBP5	KITLG
STYXL1	KLF15
SULT1C2	KLHDC5
SULT1E1	KLHL21
SUPV3L1	KLHL23
SUZ12	KLHL3
SYN2	KLHL36
SYNE1	KNTC1
SYPL1	KPNA2
TAOK1	KPNB1
TBC1D22A	KYNU
TBCA	LAMP1
TBRG1	LAMP2
TCF12	LARP1B
TCF20	LATS2
TCF7L1	LBR
TF	LCORL
TFRC	LDB2
TGFBR3	LEPREL1
THRA	LGALS3BP
TIFA	LGI1
TIPARP	LIFR
TLN1	LIG1
TMEFF2	LILRB1
TMEM110	LIMCH1
TMEM133	LIMK2
TMEM136	LIN28B
TMEM185B	LIN9
TMEM34	LITAF
TMEM59	LMAN1L
TMEM77	LMAN2L
TMEM87A	LMF1
TMF1	LMNB1
TOB1	LMNB2
TOLLIP	LNX1
TOR1AIP1	LOC100129282
TOR1AIP2	LOC100129592
TPI1	LOC100130506
TRIM28	LOC100131819
TRIO	LOC144571
TRNT1	LOC144874
TRPC1	LOC148203
TSC22D1	LOC202781
TSC22D3	LOC203274
TSPAN5	LOC221710
TSPYL4	LOC284513
TSTA3	LOC284900
TTC7A	LOC284926
TTF2	LOC285550
TUT1	LOC342892
TncRNA	LOC345630
UBE2V1	LOC375190
UBXD4	LOC399959
UHRF2	LOC400931
USP12	LOC400960
USP34	LOC440944
USP37	LOC572558
USP39	LOC643406
USP46	LOC644215
USP52	LOC645676
VGLL3	LOC650392
VKORC1L1	LOC728806
VPS26A	LOC729082
VPS35	LOC81691
VPS37B	LOC91431
WDR20	LONRF3
WDR23	LOXL4
WDR27	LPCAT2
WDR31	LPGAT1
WDR33	LPXN
WEE1	LRCH2
WIPF2	LRCH3
WNK1	LRDD
WSCD1	LRFN1
WWOX	LRP1
XKRX	LRP10
XRN1	LRP12
YES1	LRPPRC
YIPF6	LRRC8B
YPEL3	LSR
YPEL5	LTBP2
YRDC	LUC7L2
YWHAZ	LUM
ZAK	LY86
ZC3H12B	LYL1
ZDHHC4	MAD2L1
ZFYVE20	MAFB
ZMYM4	MAGED4B
ZMYND8	MAL
ZNF136	MAML2
ZNF148	MAN1A1
ZNF169	MAN2A1
ZNF185	MAN2A2
ZNF195	MAN2B2
ZNF207	MANEA
ZNF226	MAOB
ZNF232	MAP2K3
ZNF24	MAP3K5
ZNF253	MAP3K8
ZNF291	MAP6
ZNF294	MAPK8
ZNF317	MAPRE1
ZNF318	MARK1
ZNF335	MAST4
ZNF37B	MASTL
ZNF429	MATR3
ZNF43	MBD2
ZNF440	MBD4
ZNF501	MBNL1
ZNF516	MBNL2
ZNF525	MBP
ZNF544	MCAM
ZNF551	MCCC2
ZNF573	MCFD2
ZNF596	MCM10
ZNF610	MCM2
ZNF721	MCM3
ZNF764	MCM3APAS
ZNF767	MCM4
ZNF777	MCM5
ZNRF1	MCM6
ZXDC	MCM7
hCG_2024410	MCM8
	MDC1
	MDFIC
	MDM2
	ME3
	MEA1
	MED28
	MEF2C
	MELK
	MEMO1
	MET
	METAP1
	METTL7A
	MEX3A
	MFAP4
	MFSD4
	MGAT4A
	MGC2889
	MIB1
	MID1
	MID2
	MIOS
	MIS12
	MKI67
	MLF1IP
	MLLT11
	MMD
	MMP2
	MND1
	MNDA
	MNX1
	MOBKL2B
	MON2
	MPHOSPH9
	MPP3
	MRPL39
	MRPL9
	MRPS18B
	MRS2
	MRVI1
	MSH2
	MSH5
	MSH6
	MSL1
	MSN
	MSRB3
	MST150
	MT1E
	MT1F
	MT1G
	MT1H
	MT1M
	MT1P2
	MT2A
	MTF2
	MTHFD2
	MTPAP
	MTX3
	MURC
	MUT
	MX1
	MXRA7
	MYB
	MYBL1
	MYBL2
	MYCBP2
	MYCN
	MYCT1
	MYEF2
	MYH10
	MYO16
	MYO19
	MYO1E
	MYO3B
	MYOF
	MYRIP
	N4BP2
	N4BP2L1
	NAALAD2
	NACC2
	NALCN
	NANOS1
	NANP
	NAP1L2
	NAP1L4
	NAV3
	NBPF10
	NCALD
	NCAPD2
	NCAPD3
	NCAPG
	NCAPG2
	NCAPH
	NCOA3
	NCRNA00081
	ND2
	NDC80
	NEBL
	NEDD9
	NEIL3
	NEK2
	NFAT5
	NFE2L1
	NFE2L2
	NFIA
	NFIC
	NFIX
	NFKBIB
	NFYA
	NHP2
	NIT2
	NLRC5
	NMI
	NMU
	NNT
	NOL4
	NOP56
	NOTCH1
	NOTCH2
	NOVA1
	NPAT
	NPC2
	NQO1
	NR2F2
	NR3C1
	NR3C2
	NRM
	NSFL1C
	NSL1
	NSUN5B
	NSUN5C
	NT5C3
	NT5DC2
	NTRK3
	NUAK1
	NUCKS1
	NUDT11
	NUF2
	NUP107
	NUP133
	NUP153
	NUP155
	NUP160
	NUP210
	NUP50
	NUP62
	NUPL1
	NUSAP1
	NVL
	OAF
	OAS1
	ODC1
	ODF2
	OIP5
	OMG
	OPA1
	OPCML
	ORAI3
	ORC6L
	OSBPL10
	OSBPL1A
	OSBPL6
	OSTM1
	OXSR1
	P2RY1
	P2RY5
	PABPC1L
	PAG1
	PAICS
	PALB2
	PAM
	PAPSS1
	PAPSS2
	PAQR3
	PARP1
	PARP2
	PARP6
	PARP9
	PARVA
	PASK
	PAXIP1
	PBK
	PBRM1
	PBX1
	PBXIP1
	PCDH18
	PCDH7
	PCDHA2
	PCDHB2
	PCDHB3
	PCGF5
	PCGF6
	PCMTD1
	PCNA
	PCNT
	PCNX
	PCSK5
	PCSK6
	PCYT1A
	PDCD4
	PDE4A
	PDE5A
	PDE7A
	PDE7B
	PDGFA
	PDGFD
	PDGFRA
	PDK1
	PDLIM5
	PDPN
	PDS5A
	PDSS1
	PDZRN4
	PECAM1
	PEG10
	PEX5L
	PFKFB2
	PGAP1
	PGBD1
	PGBD5
	PGM2
	PGM5
	PHC1
	PHC3
	PHF11
	PHF19
	PHF20
	PHF21B
	PHLDA1
	PHTF2
	PID1
	PIK3C2A
	PIK3CD
	PIP5K1B
	PIR
	PKMYT1
	PKNOX2
	PLA2G16
	PLAT
	PLBD1
	PLCL1
	PLCXD1
	PLEKHA2
	PLK1
	PLK4
	PLP1
	PLSCR4
	PLXNC1
	PM20D2
	PMAIP1
	PMP22
	PNN
	POLA1
	POLA2
	POLD1
	POLD2
	POLD3
	POLE
	POLE2
	POLH
	POLQ
	POLR2B
	POLR2D
	PON2
	PPAP2B
	PPARA
	PPAT
	PPFIA4
	PPIA
	PPIL5
	PPM1A
	PPM1D
	PPP1CC
	PPP2R5A
	PPP4R4
	PPPDE1
	PRC1
	PRELP
	PRIM1
	PRKAB2
	PRKAR2B
	PRKCA
	PRKCB
	PRKCE
	PRKCI
	PRKD3
	PRKDC
	PRKG1
	PRKX
	PROS1
	PROSC
	PROX1
	PRPF4B
	PRPH
	PRRC1
	PRRT2
	PRTFDC1
	PRUNE
	PSEN2
	PSIP1
	PSMB7
	PSMC3IP
	PTBP2
	PTEN
	PTGDS
	PTGES3
	PTP4A1
	PTPDC1
	PTPLAD2
	PTPRB
	PTPRF
	PTPRG
	PTPRK
	PTPRM
	PTPRO
	PTTG1
	PXMP2
	PYGB
	RAB11FIP1
	RAB20
	RAB27B
	RAB31
	RAB34
	RAB3C
	RAB6B
	RAB7L1
	RABGAP1L
	RABIF
	RACGAP1
	RAD1
	RAD18
	RAD21
	RAD23B
	RAD51
	RAD51AP1
	RAD51C
	RAD54L
	RAE1
	RAI2
	RALA
	RALB
	RALGPS2
	RAN
	RANBP1
	RANBP9
	RAPGEF4
	RARRES1
	RARRES2
	RARRES3
	RASA3
	RASGRF2
	RASL12
	RASSF2
	RBBP4
	RBBP8
	RBBP9
	RBL1
	RBL2
	RBM15
	RBM25
	RBM33
	RBM8A
	RBM9
	RBMS2
	RBMX
	RCAN2
	RCBTB1
	RCC2
	RCCD1
	RCN2
	RDH10
	RDH11
	RDM1
	REC8
	RECQL4
	REEP5
	REST
	RFC3
	RFC4
	RFC5
	RFTN1
	RFWD3
	RFX5
	RFX7
	RGPD5
	RHBDL3
	RHEBL1
	RHOJ
	RHOQ
	RHOT1
	RIF1
	RILPL1
	RIPK2
	RMI1
	RNASEH2A
	RNASET2
	RNF138
	RNF144A
	RNF165
	RNF180
	RNF183
	RNF219
	RNF26
	RNF43
	RNF8
	RNFT2
	RNLS
	ROBO2
	RP11-544M22.4
	RPA1
	RPAP3
	RPRD1B
	RPS6KA2
	RPS6KA5
	RQCD1
	RRAGC
	RRBP1
	RRM1
	RRM2
	RSBN1L
	RTKN2
	RTN3
	RTP4
	RTTN
	RWDD2B
	RXRG
	S100B
	S100PBP
	S1PR1
	SAAL1
	SAC3D1
	SAE1
	SAFB
	SALL1
	SAMD4A
	SAMD5
	SAMD9L
	SASH1
	SATB1
	SCAMP2
	SCAND3
	SCARA5
	SCCPDH
	SCML2
	SCN2B
	SCN7A
	SDCCAG8
	SEC22B
	SEC61A2
	SEC62
	SEH1L
	SELENBP1
	SEMA3A
	SEMA4F
	SENP1
	SEPP1
	SEPT8
	SERF2
	SERINC2
	SERPINA1
	SERPINB9
	SERPINF1
	SERPING1
	SERPINI1
	SERTAD4
	SET
	SETD4
	SETD7
	SETDB1
	SEZ6
	SF4
	SFMBT1
	SFPQ
	SFRS1
	SFRS14
	SFRS2
	SFRS3
	SFRS7
	SFXN1
	SGMS1
	SGOL2
	SH3BGRL
	SH3BGRL2
	SH3D19
	SH3GL3
	SH3KBP1
	SH3PXD2B
	SH3RF3
	SHCBP1
	SIDT2
	SIGIRR
	SIX4
	SIX5
	SIX6
	SKP2
	SLAIN2
	SLBP
	SLC12A2
	SLC12A7
	SLC13A3
	SLC15A3
	SLC16A14
	SLC16A4
	SLC1A2
	SLC20A1
	SLC22A18
	SLC22A5
	SLC24A1
	SLC24A3
	SLC25A15
	SLC26A6
	SLC29A3
	SLC2A10
	SLC2A13
	SLC35B4
	SLC35D2
	SLC36A4
	SLC39A10
	SLC39A8
	SLC44A1
	SLC48A1
	SLC4A8
	SLC6A15
	SLC7A1
	SLC7A2
	SLC7A6
	SLC9A9
	SLCO1C1
	SLCO5A1
	SLFN13
	SLMAP
	SLMO1
	SLMO2
	SMAD6
	SMARCA4
	SMARCAD1
	SMARCC1
	SMARCE1
	SMC1A
	SMC2
	SMC3
	SMC4
	SMCHD1
	SMOC2
	SMPD4
	SMYD3
	SNAP23
	SNHG1
	SNRNP200
	SNRNP48
	SNRPA1
	SNRPC
	SNRPD1
	SNTB1
	SNTB2
	SNX1
	SNX18
	SNX21
	SNX3
	SNX9
	SOBP
	SOCS6
	SOX11
	SOX12
	SP110
	SP5
	SPAG5
	SPC24
	SPC25
	SPG20
	SPIN4
	SPINT2
	SPNS2
	SPOCK1
	SPRED1
	SPRED2
	SPRY2
	SPRYD3
	SPTBN1
	SQLE
	SQSTM1
	SRP9
	SRPK1
	SRRP35
	SSPN
	SSRP1
	SSTR1
	SSX2IP
	ST3GAL1
	ST6GALNAC3
	ST7
	ST7L
	ST8SIA2
	STAT2
	STAT3
	STAT5A
	STEAP4
	STIL
	STMN2
	STRADB
	STX3
	STXBP5L
	SUCLG2
	SULF1
	SULF2
	SUPT3H
	SUSD3
	SUV39H2
	SUZ12
	SV2A
	SVIL
	SVIP
	SYK
	SYNM
	SYNPO2
	SYT11
	SYT14
	SYTL4
	TACC1
	TACC3
	TADA1L
	TADA2B
	TAF1A
	TAF5
	TANC1
	TAP2
	TBC1D23
	TBC1D9
	TBCE
	TBX2
	TBX3
	TCEA3
	TCEAL7
	TCERG1
	TCF19
	TCF4
	TCF7L2
	TDG
	TDP1
	TDRKH
	TEAD2
	TECPR2
	TES
	TET1
	TET3
	TEX10
	TEX14
	TEX15
	TFAM
	TFAP2A
	TFPI
	TFPI2
	TFRC
	TGFB2
	TGFBR1
	TGM2
	THNSL2
	THOC4
	THRB
	THRSP
	THSD7B
	THUMPD2
	TIA1
	TIGD3
	TIMELESS
	TIMM50
	TJP1
	TJP3
	TK1
	TLK2
	TLR3
	TLR7
	TM6SF1
	TM9SF3
	TMBIM4
	TMCC3
	TMEFF1
	TMEM109
	TMEM132E
	TMEM14B
	TMEM14C
	TMEM151B
	TMEM167B
	TMEM169
	TMEM170B
	TMEM176A
	TMEM176B
	TMEM177
	TMEM194A
	TMEM200A
	TMEM37
	TMEM38B
	TMEM47
	TMEM48
	TMEM63A
	TMEM68
	TMEM97
	TMOD1
	TMPO
	TMSB15A
	TMTC1
	TMX1
	TNFAIP3
	TNFRSF14
	TNFSF13
	TNFSF13B
	TNIK
	TNRC4
	TNS1
	TNS3
	TOB1
	TOLLIP
	TOP2A
	TOP3A
	TOPBP1
	TPD52L1
	TPM1
	TPP1
	TPR
	TPRG1L
	TPX2
	TREX1
	TRIM22
	TRIM24
	TRIM37
	TRIM59
	TRIM61
	TRIM8
	TRIOBP
	TRIP11
	TRIP13
	TRIP6
	TRMT5
	TRO
	TROAP
	TRPS1
	TSC22D1
	TSC22D3
	TSGA14
	TSPAN9
	TST
	TTC13
	TTC23L
	TTC31
	TTF2
	TTK
	TTLL7
	TTMA
	TUBB
	TUBB2B
	TUBG1
	TUFT1
	TUSC3
	TXNDC16
	TYMS
	TYRP1
	UACA
	UBA2
	UBAP2L
	UBE2C
	UBE2L6
	UBE2T
	UBR5
	UBR7
	UGT8
	UHRF1
	UHRF1BP1
	UHRF2
	UNC13C
	UNC5B
	UNG
	URB2
	USP1
	USP13
	USP3
	USP34
	USP37
	USP46
	USP48
	USP53
	USP9X
	UST
	VAMP3
	VAMP4
	VANGL2
	VARS2
	VASH2
	VASN
	VCAM1
	VEZF1
	VGLL3
	VIM
	VPS13A
	VPS13D
	VRK1
	VWA5A
	WARS
	WBSCR17
	WDHD1
	WDR26
	WDR27
	WDR32
	WDR33
	WDR34
	WDR51A
	WDR67
	WDR68
	WDYHV1
	WEE1
	WFS1
	WHSC1
	WHSC2
	WNT2B
	WNT3
	WNT5B
	WRNIP1
	XK
	XPNPEP3
	XPO1
	XPO5
	XPR1
	XRCC1
	XRCC5
	YAF2
	YAP1
	YPEL1
	ZADH2
	ZBED4
	ZBTB20
	ZBTB26
	ZBTB4
	ZBTB44
	ZBTB47
	ZBTB5
	ZC3HAV1L
	ZCCHC24
	ZCCHC8
	ZDHHC13
	ZDHHC23
	ZFHX3
	ZFP36L1
	ZKSCAN4
	ZMIZ1
	ZNF107
	ZNF180
	ZNF184
	ZNF193
	ZNF20
	ZNF232
	ZNF238
	ZNF266
	ZNF273
	ZNF281
	ZNF311
	ZNF318
	ZNF324
	ZNF358
	ZNF367
	ZNF43
	ZNF449
	ZNF451
	ZNF512
	ZNF519
	ZNF529
	ZNF551
	ZNF595
	ZNF606
	ZNF608
	ZNF639
	ZNF664
	ZNF678
	ZNF680
	ZNF681
	ZNF682
	ZNF702
	ZNF711
	ZNF792
	ZNF821
	ZNF827
	ZNF83
	ZNF830
	ZNF85
	ZNF92
	ZNF93
	ZNFX1
	ZNRF2
	ZRANB3
	ZSCAN12
	ZSCAN16
	ZWINT
	ZXDC

## Sheet: RB_gene_1_50
class	Ensembl protein ID	gene symbol
positive	ENSP00000052754	DCN
positive	ENSP00000216044	GTPBP1
positive	ENSP00000220876	STMN2
positive	ENSP00000234091	ID2
positive	ENSP00000234420	MSH6
positive	ENSP00000237696	RARRES1
positive	ENSP00000237853	ELL2
positive	ENSP00000245907	C3
positive	ENSP00000250076	ZNF232
positive	ENSP00000253332	AKAP12
positive	ENSP00000254480	SMARCC1
positive	ENSP00000258399	USP37
positive	ENSP00000258729	IGF2BP3
positive	ENSP00000260327	CTDSPL2
positive	ENSP00000261537	MIB1
positive	ENSP00000261593	RNF138
positive	ENSP00000261597	NDC80
positive	ENSP00000261978	LTBP2
positive	ENSP00000262077	NUP153
positive	ENSP00000262094	RAB27B
positive	ENSP00000262105	MCM4
positive	ENSP00000263773	FNBP4
positive	ENSP00000264036	MCAM
positive	ENSP00000264663	NNT
positive	ENSP00000264930	SLC12A7
positive	ENSP00000264968	MGAT4A
positive	ENSP00000265728	DBF4
positive	ENSP00000267101	ERBB3
positive	ENSP00000268957	TOB1
positive	ENSP00000272542	SLC20A1
positive	ENSP00000274026	CCNA2
positive	ENSP00000275493	EGFR
positive	ENSP00000276893	UHRF2
positive	ENSP00000278916	CHEK1
positive	ENSP00000278919	FEZ1
positive	ENSP00000279027	SLC13A3
positive	ENSP00000280154	PDCD4
positive	ENSP00000281282	CGNL1
positive	ENSP00000281474	BICD1
positive	ENSP00000287936	HMGCR
positive	ENSP00000299293	FRS2
positive	ENSP00000303706	CDC25A
positive	ENSP00000304669	CTNNA1
positive	ENSP00000306682	PPM1D
positive	ENSP00000306894	ETV5
positive	ENSP00000308405	H2AFV
positive	ENSP00000308610	GPD2
positive	ENSP00000313171	ATAD5
positive	ENSP00000314733	TOLLIP
positive	ENSP00000315357	ARL6IP6
positive	ENSP00000316121	CDCA8
positive	ENSP00000316578	SUZ12
positive	ENSP00000319788	NQO1
positive	ENSP00000319974	BBX
positive	ENSP00000320291	OSBPL1A
positive	ENSP00000321746	PDLIM5
positive	ENSP00000322229	FADS1
positive	ENSP00000322898	EBF1
positive	ENSP00000323300	SPAG5
positive	ENSP00000324020	KIF15
positive	ENSP00000325091	LRCH2
positive	ENSP00000325377	WDR33
positive	ENSP00000327255	PPM1A
positive	ENSP00000328173	C1S
positive	ENSP00000331787	METTL7A
positive	ENSP00000331902	COL4A5
positive	ENSP00000336687	CBX3
positive	ENSP00000338562	STX3
positive	ENSP00000339191	CAV1
positive	ENSP00000339897	EME1
positive	ENSP00000340210	CD59
positive	ENSP00000341024	SATB1
positive	ENSP00000346577	AK5
positive	ENSP00000347045	ZNF43
positive	ENSP00000347464	GIT2
positive	ENSP00000348751	BTN3A2
positive	ENSP00000350267	BRPF3
positive	ENSP00000352047	GULP1
positive	ENSP00000353224	TFRC
positive	ENSP00000353483	MAPK8
positive	ENSP00000353739	PCMTD1
positive	ENSP00000354347	GFPT1
positive	ENSP00000354964	ZNF318
positive	ENSP00000355961	INTS7
positive	ENSP00000356399	CFH
positive	ENSP00000358478	TTF2
positive	ENSP00000359211	DPYD
positive	ENSP00000359321	MTF2
positive	ENSP00000360944	STIL
positive	ENSP00000361458	TSC22D3
positive	ENSP00000362768	RBL1
positive	ENSP00000362924	GSN
positive	ENSP00000365113	MASTL
positive	ENSP00000365943	PCSK5
positive	ENSP00000367770	SLC35B4
positive	ENSP00000368730	PDE7A
positive	ENSP00000370671	KLHDC5
positive	ENSP00000372035	LATS2
positive	ENSP00000373715	DCP2
positive	ENSP00000374359	ZXDC
positive	ENSP00000377696	NIT2
positive	ENSP00000380252	NFE2L2
positive	ENSP00000381164	SLC7A2
positive	ENSP00000381436	VGLL3
positive	ENSP00000381577	USP34
positive	ENSP00000397435	TSC22D1
positive	ENSP00000402084	WEE1
positive	ENSP00000407333	ARHGAP23
positive	ENSP00000407818	USP46
positive	ENSP00000412394	MAML2
negative	ENSP00000000442	ESRRA
negative	ENSP00000003100	CYP51A1
negative	ENSP00000003583	STPG1
negative	ENSP00000004982	HSPB6
negative	ENSP00000005082	ZNF195
negative	ENSP00000005180	CCL26
negative	ENSP00000005198
negative	ENSP00000005284	CACNG3
negative	ENSP00000005286	TMEM132A
negative	ENSP00000005386	RPAP3
negative	ENSP00000005558	IFRD1
negative	ENSP00000005587	SKAP2
negative	ENSP00000006053	CX3CL1
negative	ENSP00000006526	WDR54
negative	ENSP00000007414	OSBPL7
negative	ENSP00000007660	DLX6
negative	ENSP00000007699	YBX2
negative	ENSP00000007722	ITGA3
negative	ENSP00000009530	CD74
negative	ENSP00000009589	RPS20
negative	ENSP00000011292	CPA1
negative	ENSP00000012049	QPCTL
negative	ENSP00000013807	ERCC1
negative	ENSP00000014914	GPRC5A
negative	ENSP00000014930	HEBP1
negative	ENSP00000014935	DNASE1L1
negative	ENSP00000017003	XYLT2
negative	ENSP00000019317	RALBP1
negative	ENSP00000020945	SNAI2
negative	ENSP00000023897	GABRA1
negative	ENSP00000025301	AKAP11
negative	ENSP00000031146
negative	ENSP00000037502	MYOC
negative	ENSP00000044462	PSMA4
negative	ENSP00000046087	ZPBP
negative	ENSP00000046794	LCP2
negative	ENSP00000053469	GUCA1A
negative	ENSP00000053867	GRN
negative	ENSP00000055077	RFC2
negative	ENSP00000055682	KIAA2022
negative	ENSP00000062104	NNAT
negative	ENSP00000064571	CBLN4
negative	ENSP00000070846	PKP2
negative	ENSP00000078429	GNA11
negative	ENSP00000078445	CREB3L3
negative	ENSP00000085219	CD22
negative	ENSP00000156476	KLK13
negative	ENSP00000157812	PSMC4
negative	ENSP00000158771	DERL2
negative	ENSP00000160373	CTTNBP2
negative	ENSP00000160382	ACTL6B
negative	ENSP00000161006	PRSS22
negative	ENSP00000161559	CEACAM1
negative	ENSP00000161863	YTHDC2
negative	ENSP00000162044	TMEM161A
negative	ENSP00000162330	BCAR1
negative	ENSP00000164305	PIGB
negative	ENSP00000164640	PDZD4
negative	ENSP00000166244	EPHA8
negative	ENSP00000166534	P4HA2
negative	ENSP00000167218
negative	ENSP00000168216	HSD17B10
negative	ENSP00000168977	NMRK2
negative	ENSP00000169298	ST6GAL1
negative	ENSP00000170447	MKRN2
negative	ENSP00000170564	GPATCH1
negative	ENSP00000171111	KEAP1
negative	ENSP00000171214	RDH8
negative	ENSP00000171757	P2RY10
negative	ENSP00000172229	NGFR
negative	ENSP00000175506	ASNS
negative	ENSP00000175756	PTPN18
negative	ENSP00000176183	DRD4
negative	ENSP00000176763	STK10
negative	ENSP00000177694	TBX21
negative	ENSP00000181383	CPB2
negative	ENSP00000181796	FAM107B
negative	ENSP00000182290	TSPAN32
negative	ENSP00000184266	NDUFB4
negative	ENSP00000185907	ASAH2B
negative	ENSP00000186436	TMEM131
negative	ENSP00000187397	ARPP21
negative	ENSP00000192788	UHRF1BP1
negative	ENSP00000194155	PCDHB2
negative	ENSP00000194214	HSPB11
negative	ENSP00000194672
negative	ENSP00000194871	COBLL1
negative	ENSP00000196061	PLOD1
negative	ENSP00000198767	RRN3
negative	ENSP00000199706	MRPL28
negative	ENSP00000199814	RBM22
negative	ENSP00000199936	HSD17B2
negative	ENSP00000200181	ITGB4
negative	ENSP00000200652	SLC22A4
negative	ENSP00000200676	CETP
negative	ENSP00000201586	SULT2B1
negative	ENSP00000201979	REM1
negative	ENSP00000202556	PPP1R13B
negative	ENSP00000202625	TGM6
negative	ENSP00000203786	ARHGAP4
negative	ENSP00000204549	PDCD7
negative	ENSP00000204726	GOLGA3
negative	ENSP00000205194	NAT14
negative	ENSP00000205402	DLD
negative	ENSP00000205636	CMTM6
negative	ENSP00000206474	HAUS4
negative	ENSP00000206595	G2E3
negative	ENSP00000207549	UNC13D
negative	ENSP00000207870	XYLB
negative	ENSP00000209540	OR1I1
negative	ENSP00000209873	AAAS
negative	ENSP00000209875	CBX5
negative	ENSP00000210444	NANS
negative	ENSP00000211076	TPSD1
negative	ENSP00000211402	VARS
negative	ENSP00000211413	PRRT1
negative	ENSP00000214869	TMED1
negative	ENSP00000215057	MZF1
negative	ENSP00000215115	BCL7C
negative	ENSP00000215368	EFNA2
negative	ENSP00000215375	ATP5D
negative	ENSP00000215565	NDUFB7
negative	ENSP00000215570	TIMM13
negative	ENSP00000215582	C19orf21
negative	ENSP00000215591	POLRMT
negative	ENSP00000215659	MAPK12
negative	ENSP00000215727	SERPIND1
negative	ENSP00000215743	MMP11
negative	ENSP00000215754	MIF
negative	ENSP00000215770	DDTL
negative	ENSP00000215790	TBC1D10A
negative	ENSP00000215832	MAPK1
negative	ENSP00000215861
negative	ENSP00000215862	MORC2
negative	ENSP00000215872
negative	ENSP00000215885	PLA2G3
negative	ENSP00000215904	PDXP
negative	ENSP00000215941	ANKRD54
negative	ENSP00000215956	NHP2L1
negative	ENSP00000216027	HSCB
negative	ENSP00000216034	TOMM22
negative	ENSP00000216037	XBP1
negative	ENSP00000216038	C22orf28
negative	ENSP00000216039	JOSD1
negative	ENSP00000216080	LMF2
negative	ENSP00000216121	NIPSNAP1
negative	ENSP00000216122	MCM5
negative	ENSP00000216124	ARSA
negative	ENSP00000216200	PVALB
negative	ENSP00000216252	PHF5A
negative	ENSP00000216286	NID2
negative	ENSP00000216330	FKBP3
negative	ENSP00000216373	SOS2
negative	ENSP00000216446	PLEK2
negative	ENSP00000216456
negative	ENSP00000216479	AHSA1
negative	ENSP00000216484	SPTLC2
negative	ENSP00000216520
negative	ENSP00000216629	BDKRB1
negative	ENSP00000216774	SRP54
negative	ENSP00000216797	NFKBIA
negative	ENSP00000216802	PSME2
negative	ENSP00000216807	BRMS1L
negative	ENSP00000216840	RABGGTA
negative	ENSP00000216951	GSS
negative	ENSP00000216962	PYGB
negative	ENSP00000217026	MYBL2
negative	ENSP00000217121	TPD52L2
negative	ENSP00000217133	TUBB1
negative	ENSP00000217173	UBOX5
negative	ENSP00000217182	EEF1A2
negative	ENSP00000217195	C20orf27
negative	ENSP00000217381	SNTA1
negative	ENSP00000217386	OXT
negative	ENSP00000217402	CHMP4B
negative	ENSP00000217423	CST4
negative	ENSP00000217429	FAM83D
negative	ENSP00000217456	APMAP
negative	ENSP00000217515	TXNL1
negative	ENSP00000217800	POLI
negative	ENSP00000217901	IDH3G
negative	ENSP00000217939	MXRA5
negative	ENSP00000217961	STS
negative	ENSP00000218006	GUCY2F
negative	ENSP00000218056	WDR13
negative	ENSP00000218068	PAGE4
negative	ENSP00000218249	RAB40AL
negative	ENSP00000218343	PHF16
negative	ENSP00000218348	USP11
negative	ENSP00000218507	CENPI
negative	ENSP00000218652	NDFIP2
negative	ENSP00000219097	ORC6
negative	ENSP00000219150	CORO1A
negative	ENSP00000219169	NUTF2
negative	ENSP00000219252	POLR2C
negative	ENSP00000219255	PARD6A
negative	ENSP00000219302	NME3
negative	ENSP00000219345	PLA2G15
negative	ENSP00000219368	FA2H
negative	ENSP00000219478	ZNF500
negative	ENSP00000219481	DECR2
negative	ENSP00000219551	RHBDL1
negative	ENSP00000219611	SOLH
negative	ENSP00000219782	MAZ
negative	ENSP00000219789	CDIPT
negative	ENSP00000219827
negative	ENSP00000219837	C16orf88
negative	ENSP00000219865
negative	ENSP00000219919	AQP9
negative	ENSP00000220003	CSK
negative	ENSP00000220058	MTFMT
negative	ENSP00000220325	EHD4
negative	ENSP00000220478	SCG3
negative	ENSP00000220507	RHOV
negative	ENSP00000220514	OIP5
negative	ENSP00000220531	BLOC1S6
negative	ENSP00000220562	EXTL3
negative	ENSP00000220592	EIF2C2
negative	ENSP00000220616	TG
negative	ENSP00000220676	RP1
negative	ENSP00000220812	DKK4
negative	ENSP00000220822	GDAP1
negative	ENSP00000220849	EIF3E
negative	ENSP00000220853	EMC2
negative	ENSP00000220913	CHRAC1
negative	ENSP00000220966	PYCRL
negative	ENSP00000221130	GSR
negative	ENSP00000221204	FGL1
negative	ENSP00000221265	PAF1
negative	ENSP00000221283	STXBP2
negative	ENSP00000221307	CYP4F3
negative	ENSP00000221347	FCGBP
negative	ENSP00000221399	TULP2
negative	ENSP00000221419	HNRNPL
negative	ENSP00000221455	CLASRP
negative	ENSP00000221480	PEX11G
negative	ENSP00000221494	SF3A2
negative	ENSP00000221496	AMH
negative	ENSP00000221498	DKKL1
negative	ENSP00000221730	EPHX3
negative	ENSP00000221797	LGALS13
negative	ENSP00000221804	CLC
negative	ENSP00000221847	EBI3
negative	ENSP00000221972	CD79A
negative	ENSP00000221975	RPS19
negative	ENSP00000222032	CNFN
negative	ENSP00000222122	DBP
negative	ENSP00000222139	EPOR
negative	ENSP00000222219	DNASE2
negative	ENSP00000222256	RAB3A
negative	ENSP00000222266	PSENEN
negative	ENSP00000222271	COMP
negative	ENSP00000222308	FKBP8
negative	ENSP00000222345	SIPA1L3
negative	ENSP00000222644	MPP6
negative	ENSP00000222674	NPVF
negative	ENSP00000222718	HOXA2
negative	ENSP00000222792	CHN2
negative	ENSP00000222803	FKBP14
negative	ENSP00000222836
negative	ENSP00000222902	CCL24
negative	ENSP00000222956
negative	ENSP00000222968	PDAP1
negative	ENSP00000222990	SNX8
negative	ENSP00000223026	HYAL4
negative	ENSP00000223061	PCOLCE
negative	ENSP00000223127	PLOD3
negative	ENSP00000223215	MEST
negative	ENSP00000223398	CLIP2
negative	ENSP00000223528	FKTN
negative	ENSP00000223642	C5
negative	ENSP00000223862	RLN1
negative	ENSP00000224073	EDF1
negative	ENSP00000224237	VIM
negative	ENSP00000224356	CYP26A1
negative	ENSP00000224600	RBP3
negative	ENSP00000224605	GDF10
negative	ENSP00000225245	CCL3
negative	ENSP00000225328	P2RX5
negative	ENSP00000225396	TADA2A
negative	ENSP00000225428	CWC25
negative	ENSP00000225474	CSF3
negative	ENSP00000225688	RASD1
negative	ENSP00000225805	C17orf75
negative	ENSP00000225840
negative	ENSP00000225842	CCL1
negative	ENSP00000225844	CCL13
negative	ENSP00000225873	PEX12
negative	ENSP00000225929	HSD17B1
negative	ENSP00000225941	ABI3
negative	ENSP00000225969	MRPL27
negative	ENSP00000225972	LRRC59
negative	ENSP00000225973
negative	ENSP00000226021	CACNG1
negative	ENSP00000226091	EFNB3
negative	ENSP00000226105	RANGRF
negative	ENSP00000226193	RCVRN
negative	ENSP00000226230	TMEM97
negative	ENSP00000226247	FOXN1
negative	ENSP00000226355	AFM
negative	ENSP00000226413	GNRHR
negative	ENSP00000226432	CWH43
negative	ENSP00000226460	SMR3A
negative	ENSP00000226524	PF4V1
negative	ENSP00000227135	SPA17
negative	ENSP00000227163	SPI1
negative	ENSP00000227451	DTX4
negative	ENSP00000227495	ST3GAL4
negative	ENSP00000227507	CCND1
negative	ENSP00000227665	APOA5
negative	ENSP00000227756	GALNTL4
negative	ENSP00000227868	PDHX
negative	ENSP00000227880	SLC15A3
negative	ENSP00000228136	C11orf58
negative	ENSP00000228140	RPS13
negative	ENSP00000228284	SART3
negative	ENSP00000228425	PPFIBP1
negative	ENSP00000228476	DAO
negative	ENSP00000228606	CYP27B1
negative	ENSP00000228644	MYF5
negative	ENSP00000228682	GLI1
negative	ENSP00000228705	PPM1H
negative	ENSP00000228820	PARP11
negative	ENSP00000228862	DUSP16
negative	ENSP00000228865	CREBL2
negative	ENSP00000228887	GPRC5D
negative	ENSP00000228938	MGP
negative	ENSP00000228945	ARHGDIB
negative	ENSP00000229030	FZD10
negative	ENSP00000229134	IL26
negative	ENSP00000229135	IFNG
negative	ENSP00000229195	CNOT2
negative	ENSP00000229238	MRPL51
negative	ENSP00000229243	ACRBP
negative	ENSP00000229266	CHPT1
negative	ENSP00000229277	ENO2
negative	ENSP00000229314	GOLT1B
negative	ENSP00000229328	PRKAB1
negative	ENSP00000229379	COX6A1
negative	ENSP00000229384	GATC
negative	ENSP00000229395	FGFR1OP2
negative	ENSP00000229563	TMEM14C
negative	ENSP00000229633	HINT3
negative	ENSP00000229769	FANCE
negative	ENSP00000229955	GPR63
negative	ENSP00000230050	RPS12
negative	ENSP00000230053	B3GAT2
negative	ENSP00000230122	ZBTB24
negative	ENSP00000230223	OR5V1
negative	ENSP00000230256	UNC93A
negative	ENSP00000230321	MDFI
negative	ENSP00000230381	PRPH2
negative	ENSP00000230565	ENPP5
negative	ENSP00000230588	MEP1A
negative	ENSP00000230658	ISL1
negative	ENSP00000230792	NUDT12
negative	ENSP00000230882	GHR
negative	ENSP00000230895	DAP
negative	ENSP00000230914
negative	ENSP00000231121	HAND1
negative	ENSP00000231188	GRM6
negative	ENSP00000231238	TTC1
negative	ENSP00000231484	PCDH12
negative	ENSP00000231512	C5orf15
negative	ENSP00000231656	CDX1
negative	ENSP00000231751	LTF
negative	ENSP00000232217	RBP2
negative	ENSP00000232375	PFKFB4
negative	ENSP00000232496	TUSC2
negative	ENSP00000232607	UMPS
negative	ENSP00000232854	HEMK1
negative	ENSP00000232905	EIF1B
negative	ENSP00000232975	TNNC1
negative	ENSP00000233078	DAZAP1
negative	ENSP00000233121	MAPRE3
negative	ENSP00000233331	INO80B
negative	ENSP00000233468	AC008073.5
negative	ENSP00000233557	NRBP1
negative	ENSP00000233893	HSPE1
negative	ENSP00000233954	IL1RL1
negative	ENSP00000233957	IL18R1
negative	ENSP00000233969	SLC9A2
negative	ENSP00000234111	ODC1
negative	ENSP00000234170	CEBPZ
negative	ENSP00000234296	ORC2
negative	ENSP00000234389	GRIN3B
negative	ENSP00000234590	ENO1
negative	ENSP00000234626	CDC7
negative	ENSP00000234800	SLC35E2B
negative	ENSP00000234816	ANGPTL1
negative	ENSP00000234831	TMEM59
negative	ENSP00000234923
negative	ENSP00000234961	OPRD1
negative	ENSP00000235180	DLGAP3
negative	ENSP00000235372	PRDM2
negative	ENSP00000236051	EBNA1BP2
negative	ENSP00000236067	ATP6V0B
negative	ENSP00000236255	GRHL3
negative	ENSP00000236273	SYF2
negative	ENSP00000236671	CTSD
negative	ENSP00000236826	MMP8
negative	ENSP00000236980	FASTKD2
negative	ENSP00000237172	FILIP1
negative	ENSP00000237201	SPACA1
negative	ENSP00000237275	ZC2HC1B
negative	ENSP00000237281	FBXO30
negative	ENSP00000237289	TNFAIP3
negative	ENSP00000237455	RNF103
negative	ENSP00000237500	MYL12B
negative	ENSP00000237527	GHRH
negative	ENSP00000237530	RPN2
negative	ENSP00000238044	C2orf40
negative	ENSP00000238081	YWHAQ
negative	ENSP00000238112	CPSF3
negative	ENSP00000238341	CNTRL
negative	ENSP00000238497	VPS4B
negative	ENSP00000238522
negative	ENSP00000238609	IFI27L2
negative	ENSP00000238616	NEK9
negative	ENSP00000238647	IRF2BPL
negative	ENSP00000238682	TGFB3
negative	ENSP00000238688	SLIRP
negative	ENSP00000238699	GPR68
negative	ENSP00000238714	PAPOLG
negative	ENSP00000238738	RHOQ
negative	ENSP00000238823	FAM98A
negative	ENSP00000238831	YIPF4
negative	ENSP00000239165	HOXB7
negative	ENSP00000239223	DUSP1
negative	ENSP00000239347	IFNA7
negative	ENSP00000239614	MSANTD2
negative	ENSP00000239761	MRC1
negative	ENSP00000239906	FAM53C
negative	ENSP00000239940	PFN2
negative	ENSP00000239944	SERP1
negative	ENSP00000240055	NFYB
negative	ENSP00000240079	CCDC53
negative	ENSP00000240139	PPP3CC
negative	ENSP00000240327	SPOP
negative	ENSP00000240328	TBX2
negative	ENSP00000240335	TBX4
negative	ENSP00000240364	FAM117A
negative	ENSP00000240488	MND1
negative	ENSP00000240618	KLRK1
negative	ENSP00000240652	IAPP
negative	ENSP00000240851	TFG
negative	ENSP00000240922	NAA50
negative	ENSP00000241014	MAPK8IP1
negative	ENSP00000241051	DEPDC7
negative	ENSP00000241071	FBXO24
negative	ENSP00000241124	GJB6
negative	ENSP00000241502	FYTTD1
negative	ENSP00000241802	HLA-DQA2
negative	ENSP00000241808	PRM2
negative	ENSP00000242248	POLM
negative	ENSP00000242338	CNTFR
negative	ENSP00000242462	NEUROG3
negative	ENSP00000242465	SRGN
negative	ENSP00000242475
negative	ENSP00000242719	RNF11
negative	ENSP00000242728	BHLHE41
negative	ENSP00000242776	DDX39A
negative	ENSP00000242784	C19orf43
negative	ENSP00000242796	WDR83
negative	ENSP00000242810	KLHL24
negative	ENSP00000242819	CCDC70
negative	ENSP00000243050	NR4A1
negative	ENSP00000243052	PDE1B
negative	ENSP00000243077	LRP1
negative	ENSP00000243152
negative	ENSP00000243167	FAAH
negative	ENSP00000243189	C1orf63
negative	ENSP00000243213	IL13RA2
negative	ENSP00000243286	TCEAL3
negative	ENSP00000243297	H2BFM
negative	ENSP00000243298	RAB9B
negative	ENSP00000243326	RIF1
negative	ENSP00000243346	NMI
negative	ENSP00000243563	SNRPA
negative	ENSP00000243662	RAB38
negative	ENSP00000243706	HAUS3
negative	ENSP00000243786	INHA
negative	ENSP00000243878	C16orf48
negative	ENSP00000243938	WFDC3
negative	ENSP00000244040	RAB22A
negative	ENSP00000244043	PTGIS
negative	ENSP00000244050	SNAI1
negative	ENSP00000244051	MOCS3
negative	ENSP00000244061	RNF114
negative	ENSP00000244174	IL9R
negative	ENSP00000244230	MPHOSPH10
negative	ENSP00000244289	LIPE
negative	ENSP00000244360	RNF39
negative	ENSP00000244458	PACSIN1
negative	ENSP00000244519	BTN3A3
negative	ENSP00000244565	UNC5CL
negative	ENSP00000244573	HIST1H1A
negative	ENSP00000244728	COL21A1
negative	ENSP00000244741	CDKN1A
negative	ENSP00000244745	SOX4
negative	ENSP00000244766	NRN1
negative	ENSP00000245206	GOT2
negative	ENSP00000245312	SLC10A2
negative	ENSP00000245414	IRF1
negative	ENSP00000245503	MYH2
negative	ENSP00000245541	GGA3
negative	ENSP00000245564	MSTO1
negative	ENSP00000245615	MBOAT7
negative	ENSP00000245680	SLC35F5
negative	ENSP00000245796	PSD4
negative	ENSP00000245810	PSPN
negative	ENSP00000245816	CLPP
negative	ENSP00000245903	CD70
negative	ENSP00000245934	SYMPK
negative	ENSP00000246012	CST8
negative	ENSP00000246039
negative	ENSP00000246041	AP5S1
negative	ENSP00000246069	DSTN
negative	ENSP00000246081	OTOR
negative	ENSP00000246090	BANF2
negative	ENSP00000246100	FAM110A
negative	ENSP00000246112	TLE6
negative	ENSP00000246151	PITHD1
negative	ENSP00000246229	PLAGL2
negative	ENSP00000246515	SLURP1
negative	ENSP00000246533	CAPNS1
negative	ENSP00000246549	FFAR2
negative	ENSP00000246554	COX6B1
negative	ENSP00000246646	KRT38
negative	ENSP00000246672	NR1D1
negative	ENSP00000246789
negative	ENSP00000246895	STATH
negative	ENSP00000246896	HTN1
negative	ENSP00000246914	WNK4
negative	ENSP00000247087	AHDC1
negative	ENSP00000247138	SLC35A2
negative	ENSP00000247161	ELK1
negative	ENSP00000247170	DAAM1
negative	ENSP00000247178	ATG14
negative	ENSP00000247182	SIX1
negative	ENSP00000247306	CTAG2
negative	ENSP00000247461	CANX
negative	ENSP00000247665	PHPT1
negative	ENSP00000247829	TSPAN8
negative	ENSP00000247879	TAS2R3
negative	ENSP00000247933	IDUA
negative	ENSP00000247977	FBXL12
negative	ENSP00000248076	F2RL3
negative	ENSP00000248244	TICAM1
negative	ENSP00000248342	EIF3K
negative	ENSP00000248420	CACTIN
negative	ENSP00000248437	TUBA4A
negative	ENSP00000248553	HSPB1
negative	ENSP00000248572	GNGT1
negative	ENSP00000248598	FGL2
negative	ENSP00000248600	STYXL1
negative	ENSP00000248701	SPINK2
negative	ENSP00000248846	TUBGCP6
negative	ENSP00000248879	DGCR6L
negative	ENSP00000248923	GGT1
negative	ENSP00000248984	C22orf24
negative	ENSP00000249005	A4GALT
negative	ENSP00000249014	CDC42EP1
negative	ENSP00000249016	MCHR1
negative	ENSP00000249330	VGF
negative	ENSP00000249344	FAM40B
negative	ENSP00000249389	OPN1SW
negative	ENSP00000249442	MTX2
negative	ENSP00000249598	GDF2
negative	ENSP00000249749	DLL4
negative	ENSP00000249822	ARPP19
negative	ENSP00000249861	THAP10
negative	ENSP00000249883	AMOTL2
negative	ENSP00000250101	TXNDC17
negative	ENSP00000250360	SIGLEC9
negative	ENSP00000250457	EGLN3
negative	ENSP00000250559	RAP1B
negative	ENSP00000250693	ART1
negative	ENSP00000250784	RPS4Y1
negative	ENSP00000251071	CAPRIN2
negative	ENSP00000251076	DMXL2
negative	ENSP00000251119	ZFYVE26
negative	ENSP00000251203	PBX4
negative	ENSP00000251241	DHX40
negative	ENSP00000251250	DTWD1
negative	ENSP00000251275
negative	ENSP00000251312	DHRS11
negative	ENSP00000251343	KHNYN
negative	ENSP00000251377	LILRA2
negative	ENSP00000251453	RPS16
negative	ENSP00000251507	RABGAP1L
negative	ENSP00000251535	ALOX12
negative	ENSP00000251566	UGT2A3
negative	ENSP00000251582	ADAMTS2
negative	ENSP00000251642	DHX58
negative	ENSP00000251643	KRT12
negative	ENSP00000251646	KRT33B
negative	ENSP00000251648
negative	ENSP00000251691	KIAA1244
negative	ENSP00000251775	SNX4
negative	ENSP00000251849	RAF1
negative	ENSP00000251968	TSG101
negative	ENSP00000251973	CARD10
negative	ENSP00000252015	TRPC4AP
negative	ENSP00000252029	TYMP
negative	ENSP00000252037	FKBP6
negative	ENSP00000252085	PCDHGA12
negative	ENSP00000252172	MYH13
negative	ENSP00000252252	KRT6B
negative	ENSP00000252268	DPF2
negative	ENSP00000252321	KCNA5
negative	ENSP00000252338	FAM155B
negative	ENSP00000252455	PRKCSH
negative	ENSP00000252463	ZSCAN10
negative	ENSP00000252486	APOE
negative	ENSP00000252595	SLC27A1
negative	ENSP00000252599	GLT25D1
negative	ENSP00000252669	ACSBG2
negative	ENSP00000252674	MLLT1
negative	ENSP00000252725	ARPC1B
negative	ENSP00000252729	CACNG6
negative	ENSP00000252804	PXDN
negative	ENSP00000252825	HRC
negative	ENSP00000252826	TRPM4
negative	ENSP00000252854	OLFM1
negative	ENSP00000252898	TNNI2
negative	ENSP00000252936	TUBGCP2
negative	ENSP00000252997	GATA5
negative	ENSP00000252999	LAMA5
negative	ENSP00000253004	ASS1
negative	ENSP00000253024	TRIM28
negative	ENSP00000253031	YIPF2
negative	ENSP00000253039	EIF2S3
negative	ENSP00000253047	TMEM160
negative	ENSP00000253048	ZC3H4
negative	ENSP00000253079	CCDC62
negative	ENSP00000253099	MRPL4
negative	ENSP00000253115	ZNF426
negative	ENSP00000253193	LRP3
negative	ENSP00000253233	C12orf65
negative	ENSP00000253237	GRWD1
negative	ENSP00000253270	SLC35D2
negative	ENSP00000253335
negative	ENSP00000253339	LATS1
negative	ENSP00000253354	BPIFB1
negative	ENSP00000253452	COX4I1
negative	ENSP00000253458	KIAA0182
negative	ENSP00000253669	HAUS8
negative	ENSP00000253754	PDLIM4
negative	ENSP00000253794	VPS25
negative	ENSP00000253796	RAMP2
negative	ENSP00000253925	PPFIA1
negative	ENSP00000253968	BARX1
negative	ENSP00000254043	KRT15
negative	ENSP00000254079	PPP1R1B
negative	ENSP00000254122	FSHB
negative	ENSP00000254190	CHSY1
negative	ENSP00000254227	NR0B2
negative	ENSP00000254320	PODNL1
negative	ENSP00000254322	DNAJB1
negative	ENSP00000254323	ZSWIM4
negative	ENSP00000254325	RFX1
negative	ENSP00000254336	C19orf57
negative	ENSP00000254457	LHX1
negative	ENSP00000254466	GAS2L2
negative	ENSP00000254508	NUP210
negative	ENSP00000254521	HSD17B7
negative	ENSP00000254528	EMILIN2
negative	ENSP00000254605	RRP8
negative	ENSP00000254616	FXC1
negative	ENSP00000254654	ILKAP
negative	ENSP00000254695	RAP1GAP2
negative	ENSP00000254712
negative	ENSP00000254722	SERPINF1
negative	ENSP00000254730	EEFSEC
negative	ENSP00000254765	POPDC3
negative	ENSP00000254801	IGJ
negative	ENSP00000254806	WBP2
negative	ENSP00000254878	HRSP12
negative	ENSP00000254898	MATN2
negative	ENSP00000254901	REEP2
negative	ENSP00000254928	ERAL1
negative	ENSP00000254942	TERF2
negative	ENSP00000254950	VPS4A
negative	ENSP00000254963	HSPA12B
negative	ENSP00000255030	CRP
negative	ENSP00000255040	APCS
negative	ENSP00000255078	IGHMBP2
negative	ENSP00000255082	ACY3
negative	ENSP00000255174	C20orf111
negative	ENSP00000255198	ZBED3
negative	ENSP00000255224	SYT4
negative	ENSP00000255380	CHRM3
negative	ENSP00000255389	PEMT
negative	ENSP00000255390	SCO1
negative	ENSP00000255465	CCNA1
negative	ENSP00000255476	RFXAP
negative	ENSP00000255531	PCDH19
negative	ENSP00000255608	BTBD2
negative	ENSP00000255613	SUV420H2
negative	ENSP00000255641	CSNK1G2
negative	ENSP00000255681	MACROD1
negative	ENSP00000255945	GIMAP4
negative	ENSP00000255992	KRBA1
negative	ENSP00000255998
negative	ENSP00000256031	ATP13A3
negative	ENSP00000256103	PMP2
negative	ENSP00000256186	MICALCL
negative	ENSP00000256194	MICAL2
negative	ENSP00000256196	RRAS2
negative	ENSP00000256216	HSD17B4
negative	ENSP00000256261	DUSP26
negative	ENSP00000256324	C14orf159
negative	ENSP00000256343	CATSPERB
negative	ENSP00000256383	EIF2S1
negative	ENSP00000256443	CDK7
negative	ENSP00000256447	CD180
negative	ENSP00000256452	IL5RA
negative	ENSP00000256458	IRAK2
negative	ENSP00000256460	CAMK1
negative	ENSP00000256496	ARL8B
negative	ENSP00000256497	EDEM1
negative	ENSP00000256592	TSHB
negative	ENSP00000256644	HBXIP
negative	ENSP00000256646	NOTCH2
negative	ENSP00000256652	CD101
negative	ENSP00000256686	TMEM106C
negative	ENSP00000256722	CMPK2
negative	ENSP00000256737	ANO3
negative	ENSP00000256759	FST
negative	ENSP00000256861	ITIH5
negative	ENSP00000256958	SLCO1B1
negative	ENSP00000257068	MTNR1B
negative	ENSP00000257177	ZCCHC11
negative	ENSP00000257198	DSC1
negative	ENSP00000257264	TCN1
negative	ENSP00000257287	CEP135
negative	ENSP00000257336	BIVM
negative	ENSP00000257347	CARS2
negative	ENSP00000257359	ADAMTS8
negative	ENSP00000257430	APC
negative	ENSP00000257555	HNF1A
negative	ENSP00000257566	TBX3
negative	ENSP00000257575	RNFT2
negative	ENSP00000257622	POM121
negative	ENSP00000257663	TMEM60
negative	ENSP00000257700	RINT1
negative	ENSP00000257724	MDFIC
negative	ENSP00000257745	MLL5
negative	ENSP00000257749	BACH2
negative	ENSP00000257765	KHDC1
negative	ENSP00000257787	AKIRIN2
negative	ENSP00000257789	ORC3
negative	ENSP00000257836	PRRG4
negative	ENSP00000257860	PRPH
negative	ENSP00000257867	LACRT
negative	ENSP00000257895	RDH5
negative	ENSP00000257899	BLOC1S1
negative	ENSP00000257901	KRT85
negative	ENSP00000257904	CDK4
negative	ENSP00000257909	TROAP
negative	ENSP00000257974	KRT82
negative	ENSP00000257979	MIP
negative	ENSP00000258111	KCNMB4
negative	ENSP00000258180	KIAA0513
negative	ENSP00000258200	FBXL8
negative	ENSP00000258243	URB2
negative	ENSP00000258281	TAF5L
negative	ENSP00000258324	PIGC
negative	ENSP00000258349	RC3H1
negative	ENSP00000258381	SP110
negative	ENSP00000258383	MRPL44
negative	ENSP00000258398	TTLL4
negative	ENSP00000258411	WNT10A
negative	ENSP00000258412	TMBIM1
negative	ENSP00000258415	CYP27A1
negative	ENSP00000258416	EIF4E2
negative	ENSP00000258417	ARMC9
negative	ENSP00000258424	COX5B
negative	ENSP00000258428	REV1
negative	ENSP00000258436	MFSD9
negative	ENSP00000258443	EDAR
negative	ENSP00000258459
negative	ENSP00000258484	EPC2
negative	ENSP00000258494	ALDH1L2
negative	ENSP00000258613	THSD1
negative	ENSP00000258679	PLEKHA8
negative	ENSP00000258682	CAMK2B
negative	ENSP00000258704	SPDYE1
negative	ENSP00000258711	CHST12
negative	ENSP00000258739	KDELR2
negative	ENSP00000258742	NUPL2
negative	ENSP00000258774	HUS1
negative	ENSP00000258787	MYO1G
negative	ENSP00000258886	IREB2
negative	ENSP00000258955	RSAD1
negative	ENSP00000258960	NMT1
negative	ENSP00000258991	TEX2
negative	ENSP00000259021	KAT7
negative	ENSP00000259030	RTP4
negative	ENSP00000259089	BLK
negative	ENSP00000259154	KCTD3
negative	ENSP00000259206	IL1RN
negative	ENSP00000259212	IL36RN
negative	ENSP00000259216	CFC1
negative	ENSP00000259254	GYPC
negative	ENSP00000259324	LRRC8A
negative	ENSP00000259339	TOR1B
negative	ENSP00000259351	RALGPS1
negative	ENSP00000259371	DAB2IP
negative	ENSP00000259400	STX17
negative	ENSP00000259407	BAAT
negative	ENSP00000259455	GABBR2
negative	ENSP00000259467	PDCL
negative	ENSP00000259569	RANBP6
negative	ENSP00000259607	CCL21
negative	ENSP00000259631	CCL27
negative	ENSP00000259632	DCTN3
negative	ENSP00000259667	HINT2
negative	ENSP00000259698	FAM65B
negative	ENSP00000259708	KLC4
negative	ENSP00000259727	GMPR
negative	ENSP00000259873	MRPS18B
negative	ENSP00000259939	RNF144B
negative	ENSP00000259963	FAM8A1
negative	ENSP00000259988	FGFBP1
negative	ENSP00000259989	FGFBP2
negative	ENSP00000260008	FHDC1
negative	ENSP00000260056	RAB30
negative	ENSP00000260061	LRRC32
negative	ENSP00000260118	GGH
negative	ENSP00000260126	SLCO5A1
negative	ENSP00000260129	TGS1
negative	ENSP00000260197	SORL1
negative	ENSP00000260246
negative	ENSP00000260264	POU2F3
negative	ENSP00000260359	NUSAP1
negative	ENSP00000260364
negative	ENSP00000260383	TUBGCP4
negative	ENSP00000260402	PLCB2
negative	ENSP00000260403	TMEM62
negative	ENSP00000260404	PAK6
negative	ENSP00000260526	ARHGAP29
negative	ENSP00000260563	RTCA
negative	ENSP00000260595	CGREF1
negative	ENSP00000260643	PREB
negative	ENSP00000260645	ABCG5
negative	ENSP00000260648	PREPL
negative	ENSP00000260653	SIX3
negative	ENSP00000260702	LOXL4
negative	ENSP00000260743	CALHM2
negative	ENSP00000260746	ARL3
negative	ENSP00000260753	KIF20B
negative	ENSP00000260926	SATB2
negative	ENSP00000260952	ASNSD1
negative	ENSP00000260988	CRYGB
negative	ENSP00000261015	WDR12
negative	ENSP00000261023	ITGAV
negative	ENSP00000261047	GUCA1C
negative	ENSP00000261167	WBP11
negative	ENSP00000261173	ATP2B1
negative	ENSP00000261180	TRHDE
negative	ENSP00000261191	ASUN
negative	ENSP00000261207	PPP1R12A
negative	ENSP00000261208	HAL
negative	ENSP00000261211	CDK17
negative	ENSP00000261233	IRAK3
negative	ENSP00000261234	TMEM5
negative	ENSP00000261254	CCND2
negative	ENSP00000261267	LYZ
negative	ENSP00000261296	TGDS
negative	ENSP00000261304	GALC
negative	ENSP00000261318	C12orf49
negative	ENSP00000261340	CLEC2D
negative	ENSP00000261366	LMNB1
negative	ENSP00000261402	NUAK1
negative	ENSP00000261407	LPCAT3
negative	ENSP00000261413	MRPS27
negative	ENSP00000261435	N4BP2
negative	ENSP00000261438	KLF3
negative	ENSP00000261479	PSMA6
negative	ENSP00000261483	MAN2A1
negative	ENSP00000261488	ENOX1
negative	ENSP00000261514	CLCN3
negative	ENSP00000261523	RORA
negative	ENSP00000261588	KIAA0556
negative	ENSP00000261596	LPIN2
negative	ENSP00000261601	USP14
negative	ENSP00000261615	DPEP1
negative	ENSP00000261637	UTP20
negative	ENSP00000261643	COX10
negative	ENSP00000261692	CDK2AP1
negative	ENSP00000261693	SCARB1
negative	ENSP00000261707	SLC6A4
negative	ENSP00000261713	TMEM98
negative	ENSP00000261714	BLMH
negative	ENSP00000261722	AP3B2
negative	ENSP00000261735	ERP29
negative	ENSP00000261739	ANKRD13A
negative	ENSP00000261758	MESDC2
negative	ENSP00000261769	CDH1
negative	ENSP00000261783	ARG2
negative	ENSP00000261796	IL17B
negative	ENSP00000261817	PSMD9
negative	ENSP00000261822	BCL7A
negative	ENSP00000261839	MYO5C
negative	ENSP00000261845	MAPK6
negative	ENSP00000261861	CORO2B
negative	ENSP00000261866	SPG11
negative	ENSP00000261883	CILP
negative	ENSP00000261884	TRIP4
negative	ENSP00000261890	RAB11A
negative	ENSP00000261891	DAPK2
negative	ENSP00000261893	LACTB
negative	ENSP00000261918	SEMA7A
negative	ENSP00000261921	LOXL1
negative	ENSP00000261937	FLT4
negative	ENSP00000262017	ITGB3
negative	ENSP00000262018	SGCA
negative	ENSP00000262027	MARS
negative	ENSP00000262030	ATP5B
negative	ENSP00000262039	PIK3C3
negative	ENSP00000262052	SLC11A2
negative	ENSP00000262056	EIF4B
negative	ENSP00000262059	CALCOCO1
negative	ENSP00000262095	ONECUT2
negative	ENSP00000262101	MSR1
negative	ENSP00000262102	MTUS1
negative	ENSP00000262144	WDR59
negative	ENSP00000262158	SMAD7
negative	ENSP00000262160	SMAD2
negative	ENSP00000262177	DNAJB6
negative	ENSP00000262186	KCNH2
negative	ENSP00000262187	RHEB
negative	ENSP00000262198	ADNP2
negative	ENSP00000262209	TRPA1
negative	ENSP00000262213	TRAM1
negative	ENSP00000262225	TMED2
negative	ENSP00000262244	MOB3B
negative	ENSP00000262288	SCPEP1
negative	ENSP00000262290	LPO
negative	ENSP00000262302	NUBP2
negative	ENSP00000262305	RAB11FIP3
negative	ENSP00000262352	SLC1A1
negative	ENSP00000262366	GLIS2
negative	ENSP00000262370	MGRN1
negative	ENSP00000262374	ALG1
negative	ENSP00000262375	DNAJA3
negative	ENSP00000262384	N4BP1
negative	ENSP00000262406	RGS9
negative	ENSP00000262407	ITGA2B
negative	ENSP00000262418	SLC4A1
negative	ENSP00000262426	FOXF1
negative	ENSP00000262429	ATP2C2
negative	ENSP00000262441	GLP2R
negative	ENSP00000262457	INVS
negative	ENSP00000262462	SLC27A6
negative	ENSP00000262483	PITPNM3
negative	ENSP00000262493	GNAO1
negative	ENSP00000262506	CSNK2A2
negative	ENSP00000262570	CHCHD3
negative	ENSP00000262613	SLC9A3R1
negative	ENSP00000262624
negative	ENSP00000262646	RAB2A
negative	ENSP00000262662	CDKN2C
negative	ENSP00000262715	TEP1
negative	ENSP00000262717	CDH20
negative	ENSP00000262752	RPS6KA6
negative	ENSP00000262809	ELL
negative	ENSP00000262811	MAST3
negative	ENSP00000262817	TMEM59L
negative	ENSP00000262865	BPI
negative	ENSP00000262873	MYH7B
negative	ENSP00000262890	PAFAH1B3
negative	ENSP00000262894	ZNF225
negative	ENSP00000262919	ATRN
negative	ENSP00000262932	CNPY4
negative	ENSP00000262940	RASA4
negative	ENSP00000262953	TLE2
negative	ENSP00000262962	CCDC94
negative	ENSP00000262966	MPND
negative	ENSP00000262990	ZNF330
negative	ENSP00000263026	EEF2K
negative	ENSP00000263035	DHTKD1
negative	ENSP00000263045	CRISP3
negative	ENSP00000263071	SCARF1
negative	ENSP00000263087	ITGAE
negative	ENSP00000263093	SLC27A5
negative	ENSP00000263094	ABCA7
negative	ENSP00000263095	ZNF264
negative	ENSP00000263150	WDR37
negative	ENSP00000263187	MSH4
negative	ENSP00000263201	CDC45
negative	ENSP00000263208	HIRA
negative	ENSP00000263239	DDX18
negative	ENSP00000263265	PLEKHA4
negative	ENSP00000263273	NUCB1
negative	ENSP00000263281	GIPR
negative	ENSP00000263326	IL37
negative	ENSP00000263339	IL1A
negative	ENSP00000263346	TCF25
negative	ENSP00000263360	EED
negative	ENSP00000263370	ITPKC
negative	ENSP00000263373	SPTBN4
negative	ENSP00000263381	WIZ
negative	ENSP00000263384	FAM32A
negative	ENSP00000263388	NOTCH3
negative	ENSP00000263408	C9
negative	ENSP00000263409	LIFR
negative	ENSP00000263437	NLRP2
negative	ENSP00000263461	WDR11
negative	ENSP00000263498
negative	ENSP00000263556	P4HA1
negative	ENSP00000263579	DCPS
negative	ENSP00000263598	LCN1
negative	ENSP00000263645	CD81
negative	ENSP00000263665	CNTN3
negative	ENSP00000263697	DNAJC8
negative	ENSP00000263774	NDUFS3
negative	ENSP00000263780	CHMP2B
negative	ENSP00000263800	LTK
negative	ENSP00000263846	SYT7
negative	ENSP00000263847	OSBP
negative	ENSP00000263851	IL7
negative	ENSP00000263857	POLR1A
negative	ENSP00000263867	CAPG
negative	ENSP00000263925	LNX1
negative	ENSP00000263946	PKP1
negative	ENSP00000263966	USP13
negative	ENSP00000264005	LCAT
negative	ENSP00000264009	HSF4
negative	ENSP00000264010	CTCF
negative	ENSP00000264012	CDH3
negative	ENSP00000264018	DDX6
negative	ENSP00000264029	TREH
negative	ENSP00000264037	TECTA
negative	ENSP00000264042	FARP2
negative	ENSP00000264047	SLC5A7
negative	ENSP00000264071	TUBB4A
negative	ENSP00000264094	LOXL3
negative	ENSP00000264110	ATF2
negative	ENSP00000264126	GPSM2
negative	ENSP00000264128
negative	ENSP00000264160	R3HDM1
negative	ENSP00000264167	AGPS
negative	ENSP00000264169	ORC4
negative	ENSP00000264192	CYTIP
negative	ENSP00000264193	CPOX
negative	ENSP00000264220	PPAT
negative	ENSP00000264249	CHST10
negative	ENSP00000264257	IL1RL2
negative	ENSP00000264279	NOP58
negative	ENSP00000264360	PCDH10
negative	ENSP00000264377	ADAM23
negative	ENSP00000264381	BCHE
negative	ENSP00000264414	CUL3
negative	ENSP00000264424	GUCY1B3
negative	ENSP00000264433	FNIP2
negative	ENSP00000264434	C2orf42
negative	ENSP00000264436	ADD2
negative	ENSP00000264463	CDH10
negative	ENSP00000264554	SHC2
negative	ENSP00000264563	IL11
negative	ENSP00000264568	BMPR1B
negative	ENSP00000264596	NEIL3
negative	ENSP00000264597
negative	ENSP00000264605	MLPH
negative	ENSP00000264638	CNTNAP1
negative	ENSP00000264661	KCNH4
negative	ENSP00000264664	FGF10
negative	ENSP00000264670	NSUN2
negative	ENSP00000264674	MECOM
negative	ENSP00000264677	SERPINI2
negative	ENSP00000264690	KLKB1
negative	ENSP00000264694	SNX25
negative	ENSP00000264708	POMC
negative	ENSP00000264709	DNMT3A
negative	ENSP00000264718	GPN1
negative	ENSP00000264720	GTF3C2
negative	ENSP00000264723	CSPG5
negative	ENSP00000264731	TP63
negative	ENSP00000264734	CLDN16
negative	ENSP00000264735	HRASLS
negative	ENSP00000264775	PPAP2A
negative	ENSP00000264808	PRDM5
negative	ENSP00000264818	TYK2
negative	ENSP00000264819	MIER2
negative	ENSP00000264824	LYL1
negative	ENSP00000264833	OLFM2
negative	ENSP00000264834	KLF1
negative	ENSP00000264867	PPARGC1A
negative	ENSP00000264883	NUP54
negative	ENSP00000264938	SLC9A3
negative	ENSP00000264951	XRN1
negative	ENSP00000264954	GRPEL1
negative	ENSP00000264972	ZAP70
negative	ENSP00000264977	PPP2R3A
negative	ENSP00000264992	ASTE1
negative	ENSP00000264998	TF
negative	ENSP00000265012	GCNT2
negative	ENSP00000265038	ERCC8
negative	ENSP00000265071	CDH6
negative	ENSP00000265077	VCAN
negative	ENSP00000265080	RASGRF2
negative	ENSP00000265094	FBXW11
negative	ENSP00000265097	THOC3
negative	ENSP00000265136	COBL
negative	ENSP00000265140	ANKRD32
negative	ENSP00000265165	LEF1
negative	ENSP00000265174	PAPSS1
negative	ENSP00000265175	SEC24B
negative	ENSP00000265191	NME5
negative	ENSP00000265245	LSG1
negative	ENSP00000265271	RBM27
negative	ENSP00000265293	WWC1
negative	ENSP00000265302
negative	ENSP00000265306
negative	ENSP00000265316	ABCB6
negative	ENSP00000265351	XPO5
negative	ENSP00000265361	SEMA3C
negative	ENSP00000265368	SYNE1
negative	ENSP00000265372	CREM
negative	ENSP00000265382	PIP5K1B
negative	ENSP00000265433	NBN
negative	ENSP00000265465	POLA2
negative	ENSP00000265495	ELF2
negative	ENSP00000265529	KIF9
negative	ENSP00000265560	USP4
negative	ENSP00000265572	OPRK1
negative	ENSP00000265593	CLCN2
negative	ENSP00000265594	MCCC1
negative	ENSP00000265598	LAMP3
negative	ENSP00000265643	GAL
negative	ENSP00000265713	KAT6A
negative	ENSP00000265717	PRKAR2B
negative	ENSP00000265732	RBM48
negative	ENSP00000265773	SMARCA2
negative	ENSP00000265800	EPB49
negative	ENSP00000265810	PDLIM2
negative	ENSP00000265836	SLC35F2
negative	ENSP00000265838	ACAT1
negative	ENSP00000265849	PMS2
negative	ENSP00000265872	CCAR1
negative	ENSP00000265881	REXO2
negative	ENSP00000265922	DBC1
negative	ENSP00000265944	MYO3A
negative	ENSP00000265963	GTF2H1
negative	ENSP00000265968	CSRP3
negative	ENSP00000265969	KCNC1
negative	ENSP00000265970	PIK3C2A
negative	ENSP00000265981	RNF141
negative	ENSP00000265983	HPX
negative	ENSP00000265986	IDE
negative	ENSP00000265990	BTAF1
negative	ENSP00000265993	TCTN3
negative	ENSP00000266031	HYAL1
negative	ENSP00000266037	DOCK3
negative	ENSP00000266068	GMEB2
negative	ENSP00000266077	SLC2A4RG
negative	ENSP00000266079	PRPF6
negative	ENSP00000266126	EIF2B2
negative	ENSP00000266458	GABARAPL1
negative	ENSP00000266509	SLCO1C1
negative	ENSP00000266517	ETNK1
negative	ENSP00000266524
negative	ENSP00000266542	C1RL
negative	ENSP00000266557	CD27
negative	ENSP00000266581	AMIGO2
negative	ENSP00000266659	GLIPR1
negative	ENSP00000266671	PHLDA1
negative	ENSP00000266674	LGR5
negative	ENSP00000266712	TMTC3
negative	ENSP00000266718	LUM
negative	ENSP00000266743	SYCP3
negative	ENSP00000266771	SLC15A4
negative	ENSP00000266970	CDK2
negative	ENSP00000266971	SUOX
negative	ENSP00000266987	TARBP2
negative	ENSP00000267116	ANKRD52
negative	ENSP00000267260	SRRM4
negative	ENSP00000267273	METTL21C
negative	ENSP00000267287	MBNL2
negative	ENSP00000267383	CDH24
negative	ENSP00000267396	REM2
negative	ENSP00000267422	NOVA1
negative	ENSP00000267460	PELI2
negative	ENSP00000267488	SLC38A6
negative	ENSP00000267512	RAB15
negative	ENSP00000267584	AK7
negative	ENSP00000267594	FAM181A
negative	ENSP00000267750	EMC4
negative	ENSP00000267803	DUOXA1
negative	ENSP00000267812	MFAP1
negative	ENSP00000267838	LYSMD2
negative	ENSP00000267843	FGF7
negative	ENSP00000267884	SRP14
negative	ENSP00000267938	UBE2Q2
negative	ENSP00000267950
negative	ENSP00000267970	TSPAN3
negative	ENSP00000267973	WDR61
negative	ENSP00000267996	TPM1
negative	ENSP00000268058	PML
negative	ENSP00000268134
negative	ENSP00000268150	MFGE8
negative	ENSP00000268184	CRTC3
negative	ENSP00000268220	SEC11A
negative	ENSP00000268231	2013-09-12
negative	ENSP00000268251	ABAT
negative	ENSP00000268261	PMM2
negative	ENSP00000268271	SNX29
negative	ENSP00000268281	PRSS36
negative	ENSP00000268383	CDR2
negative	ENSP00000268509
negative	ENSP00000268533	NUDT7
negative	ENSP00000268595	CMTM2
negative	ENSP00000268603	CDH11
negative	ENSP00000268605	NOL3
negative	ENSP00000268616	ZCCHC14
negative	ENSP00000268695	GALNS
negative	ENSP00000268704	SPG7
negative	ENSP00000268864	RASL10B
negative	ENSP00000269051	RHBDL3
negative	ENSP00000269080	ABCA8
negative	ENSP00000269159	IMPA2
negative	ENSP00000269187	SLC39A6
negative	ENSP00000269214	ESCO1
negative	ENSP00000269349	EIF4A3
negative	ENSP00000269373	FN3KRP
negative	ENSP00000269391	RNF157
negative	ENSP00000269394	ZNF750
negative	ENSP00000269491	SERPINB12
negative	ENSP00000269534	NT5C3L
negative	ENSP00000269571	ERBB2
negative	ENSP00000269593	IGFBP4
negative	ENSP00000269701	AKAP8
negative	ENSP00000269703	CYP4F22
negative	ENSP00000269856	FEM1A
negative	ENSP00000269878	CIB3
negative	ENSP00000269881	CALR3
negative	ENSP00000269967	CCDC97
negative	ENSP00000269980	BCKDHA
negative	ENSP00000270014	ZNF155
negative	ENSP00000270061	SSBP4
negative	ENSP00000270112	HUNK
negative	ENSP00000270139	IFNAR1
negative	ENSP00000270172	DNMT3L
negative	ENSP00000270279	CBLC
negative	ENSP00000270310	FXYD7
negative	ENSP00000270457
negative	ENSP00000270474	PDE4A
negative	ENSP00000270502	C19orf52
negative	ENSP00000270538	TIMM44
negative	ENSP00000270570	SLC47A1
negative	ENSP00000270593	ACPT
negative	ENSP00000270617	ZNF473
negative	ENSP00000270631	PTH2
negative	ENSP00000270645	RCN3
negative	ENSP00000270708	WRAP73
negative	ENSP00000270800	IL22RA1
negative	ENSP00000270861	PLK4
negative	ENSP00000271139	MOB3C
negative	ENSP00000271332	CELSR2
negative	ENSP00000271385	DUSP27
negative	ENSP00000271452	NUF2
negative	ENSP00000271555	MEF2D
negative	ENSP00000271588	HMCN1
negative	ENSP00000271628	SF3B4
negative	ENSP00000271636	CGN
negative	ENSP00000271883	GON4L
negative	ENSP00000272065	ACP1
negative	ENSP00000272167	EPHX1
negative	ENSP00000272190	REN
negative	ENSP00000272224	GDF7
negative	ENSP00000272298	CALM2
negative	ENSP00000272322	VPS54
negative	ENSP00000272395	TRIM43
negative	ENSP00000272425	NAT8
negative	ENSP00000272452	SULT1C4
negative	ENSP00000272610	FAHD2B
negative	ENSP00000272748	KIAA1715
negative	ENSP00000272771	TMEFF2
negative	ENSP00000272847	PTH2R
negative	ENSP00000272907	NYAP2
negative	ENSP00000272930	UBE2F
negative	ENSP00000273062	CTDSP1
negative	ENSP00000273077	PNKD
negative	ENSP00000273142
negative	ENSP00000273153	CSRNP1
negative	ENSP00000273158	SLC25A38
negative	ENSP00000273283	ITIH1
negative	ENSP00000273359	ABHD10
negative	ENSP00000273375	RABL3
negative	ENSP00000273398	ATP6V1A
negative	ENSP00000273512	NCEH1
negative	ENSP00000273550	FTH1
negative	ENSP00000273598	NICN1
negative	ENSP00000273666	STXBP5L
negative	ENSP00000273691	ILDR1
negative	ENSP00000273739	SLIT2
negative	ENSP00000273783	EIF2B5
negative	ENSP00000273814	DGKQ
negative	ENSP00000273853	CENPC1
negative	ENSP00000273854	EPHA5
negative	ENSP00000273859	ATP10D
negative	ENSP00000273905	SLC10A6
negative	ENSP00000273936	CABS1
negative	ENSP00000273951	GC
negative	ENSP00000273963	KLHL8
negative	ENSP00000274063	SFRP2
negative	ENSP00000274134	ROPN1L
negative	ENSP00000274140	2013-03-06
negative	ENSP00000274258	C5orf42
negative	ENSP00000274276	OSMR
negative	ENSP00000274496	YIPF5
negative	ENSP00000274520	IL9
negative	ENSP00000274569	PCYOX1L
negative	ENSP00000274625	FGF18
negative	ENSP00000274629	KCNMB1
negative	ENSP00000274680	FARS2
negative	ENSP00000274710	PSD2
negative	ENSP00000274712	ZMAT2
negative	ENSP00000274773	TRIM7
negative	ENSP00000274849	ABT1
negative	ENSP00000274853	PPP1R18
negative	ENSP00000274963	FGD2
negative	ENSP00000275072	PM20D2
negative	ENSP00000275216	TAAR1
negative	ENSP00000275227	SLC18B1
negative	ENSP00000275364	GNA12
negative	ENSP00000275525	IGFBP1
negative	ENSP00000275560	SRCRB4D
negative	ENSP00000275603	CCT6A
negative	ENSP00000275605	PSPH
negative	ENSP00000275699	ASB15
negative	ENSP00000275730	SLC12A9
negative	ENSP00000275764	STRA8
negative	ENSP00000275767	TMEM140
negative	ENSP00000275815	EPHA1
negative	ENSP00000275820	NOM1
negative	ENSP00000275857	NLGN4X
negative	ENSP00000276055	CHST7
negative	ENSP00000276072	TAF1
negative	ENSP00000276201	UPF3B
negative	ENSP00000276211	ARHGAP36
negative	ENSP00000276410	CHRNA6
negative	ENSP00000276431	TNFRSF10B
negative	ENSP00000276461	ERLIN2
negative	ENSP00000276480	ST18
negative	ENSP00000276585	MRPS28
negative	ENSP00000276616	PSKH2
negative	ENSP00000276646	SYBU
negative	ENSP00000276654	LRP12
negative	ENSP00000276704	C8orf76
negative	ENSP00000276708	GSDMC
negative	ENSP00000276925	CDKN2B
negative	ENSP00000276927	IFNA1
negative	ENSP00000277120	NTRK2
negative	ENSP00000277124	IDNK
negative	ENSP00000277225	ZNF462
negative	ENSP00000277508	PAEP
negative	ENSP00000277517	IDI2
negative	ENSP00000277541	NOTCH1
negative	ENSP00000277575	USP6NL
negative	ENSP00000277632	FAM188A
negative	ENSP00000277746	NRBF2
negative	ENSP00000277865	GLUD1
negative	ENSP00000278187	GAS2
negative	ENSP00000278193	LIN7C
negative	ENSP00000278279	TUT1
negative	ENSP00000278282	SCGB1A1
negative	ENSP00000278353	HSD17B12
negative	ENSP00000278379	SLC1A2
negative	ENSP00000278409	OR5F1
negative	ENSP00000278426	SLC43A1
negative	ENSP00000278550	ODZ4
negative	ENSP00000278568	PAK1
negative	ENSP00000278590	ZC3H12C
negative	ENSP00000278593
negative	ENSP00000278742	ST14
negative	ENSP00000278829	FADS3
negative	ENSP00000278853	ZP1
negative	ENSP00000278856	WDR74
negative	ENSP00000278865	MS4A3
negative	ENSP00000278882	FRG1B
negative	ENSP00000278888	MS4A2
negative	ENSP00000278935	CEP164
negative	ENSP00000278937	MPZL2
negative	ENSP00000278980	COMMD7
negative	ENSP00000279068	LSM14B
negative	ENSP00000279101	CABLES2
negative	ENSP00000279146	AIP
negative	ENSP00000279227	FERMT3
negative	ENSP00000279230	PLCB3
negative	ENSP00000279249	CDC42EP2
negative	ENSP00000279259	FAU
negative	ENSP00000279463	CNTN5
negative	ENSP00000279477	SIRPB1
negative	ENSP00000279488	DUSP6
negative	ENSP00000279544	KLRF1
negative	ENSP00000279593	GRIN2B
negative	ENSP00000279716
negative	ENSP00000279839
negative	ENSP00000280056	DHRS12
negative	ENSP00000280057	FAM124A
negative	ENSP00000280097	HNMT
negative	ENSP00000280155	ADRA2A
negative	ENSP00000280193	VEGFC
negative	ENSP00000280200	CD226
negative	ENSP00000280245	CCDC83
negative	ENSP00000280325	C11orf53
negative	ENSP00000280346	DLAT
negative	ENSP00000280354
negative	ENSP00000280362	PTS
negative	ENSP00000280481	FREM2
negative	ENSP00000280557	DENR
negative	ENSP00000280571	RILPL2
negative	ENSP00000280612	SLC7A11
negative	ENSP00000280684	KCNA6
negative	ENSP00000280704	LDHC
negative	ENSP00000280734	TMEM86A
negative	ENSP00000280756	C12orf23
negative	ENSP00000280758	BTBD11
negative	ENSP00000280800	PLBD2
negative	ENSP00000280886	DIP2C
negative	ENSP00000280892	EIF4E
negative	ENSP00000280904	DSC2
negative	ENSP00000281030	THRSP
negative	ENSP00000281038	NARS2
negative	ENSP00000281129	CEP128
negative	ENSP00000281131
negative	ENSP00000281156	KHDRBS2
negative	ENSP00000281187	VPS26B
negative	ENSP00000281189
negative	ENSP00000281419	ASAP2
negative	ENSP00000281471	AMN1
negative	ENSP00000281513	NBAS
negative	ENSP00000281543	GUF1
negative	ENSP00000281701	NVL
negative	ENSP00000281821	EPHA4
negative	ENSP00000281830	KCNE4
negative	ENSP00000281871	MZT2B
negative	ENSP00000281938	HSPB8
negative	ENSP00000282018	CYSLTR2
negative	ENSP00000282074	SPC25
negative	ENSP00000282091	PTH
negative	ENSP00000282141	CRYGC
negative	ENSP00000282146	KCNK13
negative	ENSP00000282226	FAM151B
negative	ENSP00000282308	ZNF256
negative	ENSP00000282369	TRIM36
negative	ENSP00000282388	ZFP36L2
negative	ENSP00000282391	PAN3
negative	ENSP00000282466	IGSF10
negative	ENSP00000282486	MBNL1
negative	ENSP00000282516	NIPBL
negative	ENSP00000282541	GPD1L
negative	ENSP00000282588	ITGA1
negative	ENSP00000282611	CATSPER3
negative	ENSP00000282641	A1CF
negative	ENSP00000282753	GRM1
negative	ENSP00000282849	ADAMTS18
negative	ENSP00000282869	ZNF117
negative	ENSP00000282908	STK32B
negative	ENSP00000282928	ZIC1
negative	ENSP00000283033	TXNDC11
negative	ENSP00000283109	RIOK2
negative	ENSP00000283131	SMARCA5
negative	ENSP00000283179	HNRNPU
negative	ENSP00000283228	PTPRR
negative	ENSP00000283254	SCN3A
negative	ENSP00000283303	GPR115
negative	ENSP00000283351	TRAPPC8
negative	ENSP00000283415	LPCAT1
negative	ENSP00000283429	NMRAL1
negative	ENSP00000283632	RMND5A
negative	ENSP00000283635	CD8A
negative	ENSP00000283875	GTF2E1
negative	ENSP00000283936	KCNJ16
negative	ENSP00000284061	DGKE
negative	ENSP00000284116	GDPD1
negative	ENSP00000284259
negative	ENSP00000284262	JPH3
negative	ENSP00000284273	UBASH3B
negative	ENSP00000284308
negative	ENSP00000284322	ABI3BP
negative	ENSP00000284382	CERS3
negative	ENSP00000284384
negative	ENSP00000284476	DISP1
negative	ENSP00000284503	NEIL2
negative	ENSP00000284523	WNT3A
negative	ENSP00000284551	TRIM11
negative	ENSP00000284601	PPP1R3A
negative	ENSP00000284694	C10orf90
negative	ENSP00000284719	OLA1
negative	ENSP00000284818	LY96
negative	ENSP00000284856	TMSB4Y
negative	ENSP00000284951	SEL1L2
negative	ENSP00000284987	ADAMTS5
negative	ENSP00000285018	WNT7A
negative	ENSP00000285021	XPC
negative	ENSP00000285176
negative	ENSP00000285311	DKK2
negative	ENSP00000285381	CA3
negative	ENSP00000285420	OTUD6B
negative	ENSP00000285737	LONP2
negative	ENSP00000285805	TRIM74
negative	ENSP00000285814	MKI67IP
negative	ENSP00000285928	LRGUK
negative	ENSP00000285930	AKR1B1
negative	ENSP00000286067	C10orf12
negative	ENSP00000286307	LSM11
negative	ENSP00000286355	ADCY8
negative	ENSP00000286364	RASA2
negative	ENSP00000286479	NAT2
negative	ENSP00000286544	FAM161B
negative	ENSP00000286621	ADK
negative	ENSP00000286648	DCK
negative	ENSP00000286719	PPEF2
negative	ENSP00000286760	WHAMM
negative	ENSP00000286794	NAA11
negative	ENSP00000286827	TIAM1
negative	ENSP00000286918	ANKRD9
negative	ENSP00000287008	PCDH1
negative	ENSP00000287078	TYSND1
negative	ENSP00000287196	PARP6
negative	ENSP00000287202	CELF6
negative	ENSP00000287218	ZFAND3
negative	ENSP00000287364
negative	ENSP00000287387	WDYHV1
negative	ENSP00000287396
negative	ENSP00000287482	SASS6
negative	ENSP00000287598	BUB1B
negative	ENSP00000287600	PDE6D
negative	ENSP00000287667	NOMO1
negative	ENSP00000287727	ZFYVE9
negative	ENSP00000287814	TIMP4
negative	ENSP00000287820	PPARG
negative	ENSP00000287957	GATAD1
negative	ENSP00000288040	CLEC18A
negative	ENSP00000288050	PDPR
negative	ENSP00000288167	IL17RB
negative	ENSP00000288199	RNF111
negative	ENSP00000288466	ZNF618
negative	ENSP00000288490	DGKI
negative	ENSP00000288561	UBN2
negative	ENSP00000288666	RPS4Y2
negative	ENSP00000288861	CIB4
negative	ENSP00000288912	WDR66
negative	ENSP00000288937	MRPL17
negative	ENSP00000288986	NCK1
negative	ENSP00000288988	GALNT14
negative	ENSP00000289228	ACTR1B
negative	ENSP00000289269	PCDHAC2
negative	ENSP00000289373	TMSB15A
negative	ENSP00000289407	TSPAN33
negative	ENSP00000289451	OR10K1
negative	ENSP00000289473	NCF1
negative	ENSP00000289575	SLCO2B1
negative	ENSP00000289619	PAGE5
negative	ENSP00000289746	CDH15
negative	ENSP00000289753	HTR6
negative	ENSP00000289779	F11R
negative	ENSP00000289805	SPATA2L
negative	ENSP00000289865	USP21
negative	ENSP00000289877	SLC45A1
negative	ENSP00000289953	WFDC8
negative	ENSP00000290158	KPNB1
negative	ENSP00000290330	SNF8
negative	ENSP00000290363	C1orf51
negative	ENSP00000290401	NPTN
negative	ENSP00000290431	PKD2L2
negative	ENSP00000290472	PLA2G4D
negative	ENSP00000290551	BTG2
negative	ENSP00000290552	IRX6
negative	ENSP00000290583	CELF3
negative	ENSP00000290722	PGLYRP3
negative	ENSP00000290759	ISL2
negative	ENSP00000290846	TRMU
negative	ENSP00000290949	ATP6V0D1
negative	ENSP00000290953	AGRP
negative	ENSP00000291041	PSKH1
negative	ENSP00000291231	OR3A3
negative	ENSP00000291358	IQCC
negative	ENSP00000291386	SSU72
negative	ENSP00000291416	TRIM62
negative	ENSP00000291440	CPAMD8
negative	ENSP00000291532	TMPRSS3
negative	ENSP00000291539	PDE9A
negative	ENSP00000291554	CRYAA
negative	ENSP00000291560	HSF2BP
negative	ENSP00000291565	PDXK
negative	ENSP00000291574	TRAPPC10
negative	ENSP00000291577	C21orf33
negative	ENSP00000291688	MCM3AP
negative	ENSP00000291700	S100B
negative	ENSP00000291744	FCN2
negative	ENSP00000291901	TNNT1
negative	ENSP00000292114	TMEM199
negative	ENSP00000292125	PSG6
negative	ENSP00000292174	CXCR5
negative	ENSP00000292176	ZBTB7B
negative	ENSP00000292303	CCR5
negative	ENSP00000292330	PPP1R35
negative	ENSP00000292357	PEAR1
negative	ENSP00000292377	GPC2
negative	ENSP00000292385	DBN1
negative	ENSP00000292408	FGFR4
negative	ENSP00000292433	IER2
negative	ENSP00000292476	CPSF4
negative	ENSP00000292494	LY6E
negative	ENSP00000292513	PTGER1
negative	ENSP00000292562	ZNF251
negative	ENSP00000292574	CCDC105
negative	ENSP00000292672	CELF5
negative	ENSP00000292782	DCUN1D1
negative	ENSP00000292823	PCYT1A
negative	ENSP00000292841	ZNF585A
negative	ENSP00000292879	U2AF1L4
negative	ENSP00000292894	THAP8
negative	ENSP00000293201	MYO15B
negative	ENSP00000293261	TMEM143
negative	ENSP00000293272	CCL5
negative	ENSP00000293288	BAX
negative	ENSP00000293350	ALDH16A1
negative	ENSP00000293406	LSM12
negative	ENSP00000293431
negative	ENSP00000293569
negative	ENSP00000293614	OR7G1
negative	ENSP00000293636	CELA1
negative	ENSP00000293695	SYCE2
negative	ENSP00000293709	ATF6B
negative	ENSP00000293800	SLC13A5
negative	ENSP00000293813	DLG4
negative	ENSP00000293831	EIF4A1
negative	ENSP00000293845	CCDC42
negative	ENSP00000293851	PRSS33
negative	ENSP00000293860	POLR3K
negative	ENSP00000293894	SOX8
negative	ENSP00000293922	PTX4
negative	ENSP00000293925	CRAMP1L
negative	ENSP00000293995	ZNF75A
negative	ENSP00000294008	SLX4
negative	ENSP00000294053	CLPB
negative	ENSP00000294117	GNG3
negative	ENSP00000294129	NCKIPSD
negative	ENSP00000294288	CABP2
negative	ENSP00000294312	FGF19
negative	ENSP00000294338	PDZK1IP1
negative	ENSP00000294339	TAL1
negative	ENSP00000294409	GMEB1
negative	ENSP00000294419
negative	ENSP00000294435	RBP7
negative	ENSP00000294507	LAPTM5
negative	ENSP00000294517	ADC
negative	ENSP00000294702	GFI1
negative	ENSP00000294740	ZNF281
negative	ENSP00000294794	OLFML2B
negative	ENSP00000294800	FCGR3B
negative	ENSP00000294954	LHCGR
negative	ENSP00000294964	PKDCC
negative	ENSP00000294973	HAAO
negative	ENSP00000295049	RFTN2
negative	ENSP00000295066	DPY30
negative	ENSP00000295113	FRZB
negative	ENSP00000295117	CCDC104
negative	ENSP00000295119	NUP35
negative	ENSP00000295121	WDR92
negative	ENSP00000295133	FBXO41
negative	ENSP00000295190	SLC16A14
negative	ENSP00000295201	TEKT4
negative	ENSP00000295206	EN1
negative	ENSP00000295228	INHBB
negative	ENSP00000295266	PDHA2
negative	ENSP00000295297	C1QTNF7
negative	ENSP00000295321	IWS1
negative	ENSP00000295367	SPRR3
negative	ENSP00000295373	DHX57
negative	ENSP00000295408	MERTK
negative	ENSP00000295448	GNPDA2
negative	ENSP00000295454	GABRB1
negative	ENSP00000295491	MRPS18C
negative	ENSP00000295598	ATP1A1
negative	ENSP00000295600	MITF
negative	ENSP00000295624	NAV1
negative	ENSP00000295628	LRRC58
negative	ENSP00000295645	PDCL2
negative	ENSP00000295718	PTPRN
negative	ENSP00000295743	EOMES
negative	ENSP00000295756	TRAT1
negative	ENSP00000295757	HDAC11
negative	ENSP00000295759	GLB1L
negative	ENSP00000295767	CHCHD4
negative	ENSP00000295771
negative	ENSP00000295886	NKX6-1
negative	ENSP00000295902	PRICKLE2
negative	ENSP00000295908	PPM1K
negative	ENSP00000295930	RSRC1
negative	ENSP00000295937	DNAH12
negative	ENSP00000295943
negative	ENSP00000295971	RBM47
negative	ENSP00000295980	IL17RE
negative	ENSP00000295984
negative	ENSP00000295992	PCOLCE2
negative	ENSP00000296026	CXCL3
negative	ENSP00000296029	PF4
negative	ENSP00000296046	CPA3
negative	ENSP00000296084	RYK
negative	ENSP00000296088	SNRK
negative	ENSP00000296129	CDCP1
negative	ENSP00000296135	LZTFL1
negative	ENSP00000296140	CCR1
negative	ENSP00000296142	RTP3
negative	ENSP00000296154	CASR
negative	ENSP00000296161	DTX3L
negative	ENSP00000296218	DNALI1
negative	ENSP00000296220	OSBPL11
negative	ENSP00000296252	LIPH
negative	ENSP00000296358	OTOP1
negative	ENSP00000296394
negative	ENSP00000296414	DAPP1
negative	ENSP00000296417	H2AFZ
negative	ENSP00000296420	EMCN
negative	ENSP00000296435	CAMP
negative	ENSP00000296441
negative	ENSP00000296444	SHISA5
negative	ENSP00000296456	APEH
negative	ENSP00000296464	HSPA4L
negative	ENSP00000296472
negative	ENSP00000296474	MST1R
negative	ENSP00000296504	SAP30
negative	ENSP00000296511	ANXA5
negative	ENSP00000296522	HPGD
negative	ENSP00000296525	ASB5
negative	ENSP00000296545	IL15
negative	ENSP00000296557	ARFIP1
negative	ENSP00000296591	EDIL3
negative	ENSP00000296596
negative	ENSP00000296666	PRRC1
negative	ENSP00000296682	PRDM9
negative	ENSP00000296694	SCGB3A2
negative	ENSP00000296695	SPINK1
negative	ENSP00000296721	AFAP1L1
negative	ENSP00000296733	CDC20B
negative	ENSP00000296736	TIGD6
negative	ENSP00000296741	ENPP6
negative	ENSP00000296777	CARTPT
negative	ENSP00000296792	UTP15
negative	ENSP00000296795	TLR3
negative	ENSP00000296849	NKD2
negative	ENSP00000296946	T
negative	ENSP00000296978	TMEM200A
negative	ENSP00000297056	DAGLB
negative	ENSP00000297071	TRA2A
negative	ENSP00000297107	GALNT10
negative	ENSP00000297130	MYOZ3
negative	ENSP00000297135	COG5
negative	ENSP00000297142	NEUROD6
negative	ENSP00000297145	C7orf60
negative	ENSP00000297157	RP9
negative	ENSP00000297195	SLC29A4
negative	ENSP00000297229	USP49
negative	ENSP00000297261	SHH
negative	ENSP00000297307	SLC35G3
negative	ENSP00000297313	RGS20
negative	ENSP00000297345
negative	ENSP00000297375	EN2
negative	ENSP00000297404	KCNV1
negative	ENSP00000297436	DEFA6
negative	ENSP00000297469	GPER
negative	ENSP00000297512	ASIC3
negative	ENSP00000297534	C7orf55
negative	ENSP00000297537	GBX1
negative	ENSP00000297581	DCSTAMP
negative	ENSP00000297596	GEM
negative	ENSP00000297598	PDP1
negative	ENSP00000297792	KDM1B
negative	ENSP00000297837	ANKS6
negative	ENSP00000297848	COL14A1
negative	ENSP00000297866	CXorf22
negative	ENSP00000297875	SYTL5
negative	ENSP00000297905
negative	ENSP00000297991	AQP3
negative	ENSP00000298125	WDFY2
negative	ENSP00000298130	SPTSSA
negative	ENSP00000298139	WRN
negative	ENSP00000298159	CFL2
negative	ENSP00000298171	TSHR
negative	ENSP00000298215
negative	ENSP00000298283	RPL10L
negative	ENSP00000298288	LRR1
negative	ENSP00000298295	C10orf10
negative	ENSP00000298296	MAGEC3
negative	ENSP00000298307	KLHDC2
negative	ENSP00000298310	NEMF
negative	ENSP00000298316	ARF6
negative	ENSP00000298375	AKR1E2
negative	ENSP00000298428	SEC61A2
negative	ENSP00000298440	OXGR1
negative	ENSP00000298492	FAM175B
negative	ENSP00000298510	PRDX3
negative	ENSP00000298532	SNAPC4
negative	ENSP00000298542	FRMD7
negative	ENSP00000298546	C9orf9
negative	ENSP00000298552	TSC1
negative	ENSP00000298569	KIAA1191
negative	ENSP00000298585	ZMYND19
negative	ENSP00000298635
negative	ENSP00000298687	NDRG2
negative	ENSP00000298715	VWA2
negative	ENSP00000298717	METTL3
negative	ENSP00000298772	TRIM13
negative	ENSP00000298852	PSMC3
negative	ENSP00000298861	AGBL2
negative	ENSP00000298902	IFI27
negative	ENSP00000298925	NELL1
negative	ENSP00000298999	R3HCC1L
negative	ENSP00000299084	SPRED1
negative	ENSP00000299106	JAM3
negative	ENSP00000299157	IKBIP
negative	ENSP00000299198	CKB
negative	ENSP00000299206	POLL
negative	ENSP00000299233
negative	ENSP00000299275	PLEKHA5
negative	ENSP00000299299	PCBD1
negative	ENSP00000299333	SCN3B
negative	ENSP00000299339	CLDN10
negative	ENSP00000299340	CYYR1
negative	ENSP00000299351
negative	ENSP00000299427	TPP1
negative	ENSP00000299441	DCHS1
negative	ENSP00000299498	CYB5R2
negative	ENSP00000299565	CHRNA5
negative	ENSP00000299633	RP11-382A20.3
negative	ENSP00000299641	NDST2
negative	ENSP00000299663	CLEC4E
negative	ENSP00000299727	GALR1
negative	ENSP00000299732	IQCD
negative	ENSP00000299736	CENPV
negative	ENSP00000299752	CDH16
negative	ENSP00000299866	FAM18A
negative	ENSP00000299952	MARVELD3
negative	ENSP00000299957	CASC4
negative	ENSP00000299977	SLFN5
negative	ENSP00000299989	CATSPER2
negative	ENSP00000300013	SAAL1
negative	ENSP00000300035	KIAA0101
negative	ENSP00000300055	PLIN1
negative	ENSP00000300060	ANPEP
negative	ENSP00000300069	RBPMS2
negative	ENSP00000300087	DCTN5
negative	ENSP00000300128	TMEM194A
negative	ENSP00000300151	MRPL16
negative	ENSP00000300175	SCG5
negative	ENSP00000300176	AGFG2
negative	ENSP00000300181	TSC22D4
negative	ENSP00000300231	MAP1A
negative	ENSP00000300233
negative	ENSP00000300289	PDIA3
negative	ENSP00000300302	HERPUD1
negative	ENSP00000300305	RUNX1
negative	ENSP00000300404	B4GALNT2
negative	ENSP00000300406	GNGT2
negative	ENSP00000300408	PHB
negative	ENSP00000300571	GPRC5B
negative	ENSP00000300574	CRK
negative	ENSP00000300589	NOD2
negative	ENSP00000300651	MED1
negative	ENSP00000300659	NFATC3
negative	ENSP00000300682
negative	ENSP00000300688	ATP5L
negative	ENSP00000300692	CD3D
negative	ENSP00000300714	ENTHD2
negative	ENSP00000300737	STIM1
negative	ENSP00000300773	OR51B5
negative	ENSP00000300784	FN3K
negative	ENSP00000300811	ZNF428
negative	ENSP00000300835	PRR14
negative	ENSP00000300873	GNG8
negative	ENSP00000300917	SMG8
negative	ENSP00000300976	KLHL26
negative	ENSP00000300983
negative	ENSP00000301011	ZC3H18
negative	ENSP00000301019	CDT1
negative	ENSP00000301037	SGK494
negative	ENSP00000301039	PROCA1
negative	ENSP00000301042	ZNF641
negative	ENSP00000301071	TUBA1A
negative	ENSP00000301072	TUBA1C
negative	ENSP00000301096	ZNF83
[truncated: 3,611 more rows]
