# Supplementary material for: Prediction and Analysis of Retinoblastoma Related Genes through Gene Ontology and KEGG
Source: Biomed Res Int. 2013 Aug 13;2013:304029. doi: 10.1155/2013/304029 (PMC3755425; doi:10.1155/2013/304029)
Supplement: Supplementary file 2 [file 304029.f2.xlsx]

## Sheet: Dateset1 MaxRel Table
Order	Feature	Name	Score
1	326	GO:0007126	0.035
2	964	GO:0045875	0.034
3	306	GO:0007062	0.033
4	360	GO:0008278	0.033
5	778	GO:0035196	0.032
6	706	GO:0032876	0.032
7	1100	GO:0051726	0.031
8	48	GO:0000724	0.03
9	70	GO:0000800	0.03
10	316	GO:0007091	0.03
11	1226	GO:0071168	0.03
12	1346	hsa04110	0.03
13	888	GO:0043517	0.029
14	17	GO:0000085	0.029
15	308	GO:0007064	0.029
16	184	GO:0004677	0.029
17	640	GO:0031436	0.028
18	1233	GO:0071398	0.028
19	422	GO:0010767	0.028
20	1322	GO:2000615	0.028
21	294	GO:0006974	0.028
22	822	GO:0040001	0.027
23	165	GO:0003918	0.027
24	383	GO:0009048	0.027
25	65	GO:0000793	0.027
26	12	GO:0000079	0.027
27	1232	GO:0071335	0.027
28	687	GO:0032290	0.027
29	1030	GO:0048713	0.027
30	30	GO:0000228	0.026
31	207	GO:0005515	0.026
32	1070	GO:0051276	0.026
33	417	GO:0010626	0.026
34	1188	GO:0070173	0.026
35	399	GO:0010070	0.026
36	774	GO:0035173	0.025
37	921	GO:0045143	0.025
38	652	GO:0031572	0.025
39	362	GO:0008283	0.025
40	500	GO:0016799	0.024
41	265	GO:0006302	0.024
42	716	GO:0033148	0.024
43	1027	GO:0048638	0.024
44	1323	GO:2000617	0.024
45	1204	GO:0070512	0.024
46	1324	GO:2000620	0.024
47	660	GO:0031643	0.024
48	77	GO:0000922	0.024
49	258	GO:0006275	0.023
50	983	GO:0046600	0.023
51	15	GO:0000083	0.023
52	549	GO:0021695	0.023
53	558	GO:0021889	0.023
54	66	GO:0000794	0.023
55	1154	GO:0060576	0.023
56	800	GO:0035520	0.023
57	259	GO:0006281	0.023
58	441	GO:0014013	0.023
59	935	GO:0045605	0.023
60	722	GO:0033261	0.023
61	591	GO:0030422	0.022
62	1102	GO:0051782	0.022
63	1202	GO:0070463	0.022
64	753	GO:0034509	0.022
65	1033	GO:0048733	0.022
66	530	GO:0019899	0.022
67	717	GO:0033153	0.022
68	36	GO:0000380	0.022
69	1305	GO:2000036	0.022
70	270	GO:0006312	0.022
71	987	GO:0046632	0.022
72	58	GO:0000780	0.022
73	250	GO:0006259	0.022
74	622	GO:0031081	0.022
75	169	GO:0004003	0.022
76	279	GO:0006359	0.022
77	1120	GO:0055100	0.022
78	743	GO:0034088	0.021
79	826	GO:0040038	0.021
80	506	GO:0016891	0.021
81	556	GO:0021873	0.021
82	867	GO:0043140	0.021
83	218	GO:0005657	0.021
84	985	GO:0046602	0.021
85	675	GO:0032139	0.021
86	1134	GO:0060236	0.021
87	1333	GO:2000773	0.021
88	1254	GO:0071930	0.021
89	1193	GO:0070314	0.021
90	406	GO:0010389	0.021
91	44	GO:0000710	0.021
92	1023	GO:0048478	0.021
93	79	GO:0000940	0.02
94	1209	GO:0070683	0.02
95	252	GO:0006261	0.02
96	437	GO:0010997	0.02
97	1318	GO:2000481	0.02
98	300	GO:0007049	0.02
99	823	GO:0040016	0.019
100	1293	GO:0090399	0.019
101	295	GO:0006975	0.019
102	389	GO:0009294	0.019
103	40	GO:0000405	0.019
104	534	GO:0019985	0.019
105	76	GO:0000915	0.019
106	324	GO:0007108	0.019
107	922	GO:0045145	0.019
108	784	GO:0035312	0.019
109	1108	GO:0051908	0.019
110	339	GO:0007346	0.019
111	196	GO:0005072	0.019
112	1219	GO:0070975	0.019
113	69	GO:0000797	0.019
114	10	GO:0000076	0.019
115	1077	GO:0051310	0.019
116	68	GO:0000796	0.019
117	1072	GO:0051292	0.019
118	709	GO:0032909	0.019
119	592	GO:0030423	0.019
120	714	GO:0033088	0.019
121	498	GO:0016605	0.018
122	62	GO:0000785	0.018
123	693	GO:0032405	0.018
124	967	GO:0045910	0.018
125	631	GO:0031297	0.018
126	5	GO:0000022	0.018
127	11	GO:0000077	0.018
128	776	GO:0035189	0.018
129	587	GO:0030332	0.018
130	1306	GO:2000042	0.018
131	466	GO:0015979	0.018
132	504	GO:0016851	0.018
133	467	GO:0015995	0.018
134	872	GO:0043220	0.018
135	261	GO:0006284	0.018
136	244	GO:0005971	0.018
137	253	GO:0006265	0.018
138	228	GO:0005726	0.018
139	959	GO:0045842	0.018
140	653	GO:0031573	0.018
141	1222	GO:0071107	0.018
142	163	GO:0003916	0.018
143	1081	GO:0051382	0.017
144	237	GO:0005873	0.017
145	632	GO:0031298	0.017
146	1282	GO:0090007	0.017
147	1123	GO:0060020	0.017
148	356	GO:0008156	0.017
149	680	GO:0032181	0.017
150	254	GO:0006266	0.017
151	41	GO:0000406	0.017
152	690	GO:0032302	0.017
153	320	GO:0007095	0.017
154	613	GO:0030893	0.017
155	1296	GO:0097149	0.017
156	19	GO:0000088	0.017
157	251	GO:0006260	0.017
158	88	GO:0001047	0.017
159	896	GO:0043570	0.017
160	348	GO:0008022	0.017
161	1210	GO:0070734	0.017
162	773	GO:0035140	0.017
163	688	GO:0032298	0.017
164	1185	GO:0065004	0.017
165	330	GO:0007141	0.017
166	209	GO:0005521	0.017
167	582	GO:0030263	0.017
168	919	GO:0045128	0.017
169	269	GO:0006311	0.017
170	128	GO:0002204	0.017
171	752	GO:0034501	0.016
172	255	GO:0006268	0.016
173	989	GO:0046680	0.016
174	1230	GO:0071283	0.016
175	1112	GO:0051987	0.016
176	1156	GO:0060623	0.016
177	1253	GO:0071922	0.016
178	963	GO:0045870	0.016
179	1119	GO:0055096	0.016
180	57	GO:0000779	0.016
181	391	GO:0009330	0.016
182	520	GO:0019035	0.016
183	669	GO:0032077	0.016
184	43	GO:0000701	0.016
185	898	GO:0043596	0.016
186	766	GO:0035035	0.016
187	1262	GO:0072134	0.016
188	528	GO:0019724	0.016
189	775	GO:0035174	0.016
190	900	GO:0043626	0.016
191	792	GO:0035404	0.016
192	305	GO:0007059	0.016
193	53	GO:0000775	0.016
194	317	GO:0007092	0.016
195	264	GO:0006301	0.016
196	601	GO:0030616	0.016
197	347	GO:0008013	0.016
198	307	GO:0007063	0.016
199	847	GO:0042555	0.016
200	676	GO:0032142	0.016
201	691	GO:0032357	0.016
202	47	GO:0000723	0.016
203	916	GO:0045103	0.016
204	578	GO:0030174	0.016
205	405	GO:0010333	0.016
206	387	GO:0009263	0.016
207	189	GO:0004748	0.016
208	232	GO:0005815	0.016
209	725	GO:0033484	0.016
210	164	GO:0003917	0.016
211	594	GO:0030496	0.016
212	1223	GO:0071141	0.016
213	589	GO:0030337	0.016
214	1090	GO:0051571	0.016
215	971	GO:0045943	0.016
216	742	GO:0034080	0.016
217	1067	GO:0051256	0.015
218	487	GO:0016568	0.015
219	1125	GO:0060044	0.015
220	1121	GO:0055105	0.015
221	586	GO:0030308	0.015
222	621	GO:0031065	0.015
223	153	GO:0003691	0.015
224	39	GO:0000404	0.015
225	581	GO:0030261	0.015
226	13	GO:0000080	0.015
227	564	GO:0022037	0.015
228	314	GO:0007089	0.015
229	739	GO:0033993	0.015
230	598	GO:0030512	0.015
231	672	GO:0032116	0.015
232	311	GO:0007079	0.015
233	984	GO:0046601	0.015
234	402	GO:0010212	0.015
235	73	GO:0000806	0.015
236	72	GO:0000805	0.015
237	8	GO:0000073	0.015
238	411	GO:0010484	0.015
239	918	GO:0045120	0.015
240	378	GO:0008630	0.015
241	677	GO:0032143	0.015
242	689	GO:0032301	0.015
243	313	GO:0007088	0.015
244	212	GO:0005634	0.015
245	1152	GO:0060565	0.015
246	304	GO:0007057	0.015
247	760	GO:0034722	0.015
248	875	GO:0043254	0.015
249	478	GO:0016363	0.015
250	1126	GO:0060051	0.015
251	975	GO:0046060	0.015
252	310	GO:0007076	0.015
253	415	GO:0010616	0.015
254	940	GO:0045668	0.015
255	697	GO:0032508	0.015
256	710	GO:0032916	0.014
257	59	GO:0000781	0.014
258	785	GO:0035330	0.014
259	656	GO:0031619	0.014
260	731	GO:0033593	0.014
261	1026	GO:0048592	0.014
262	173	GO:0004407	0.014
263	749	GO:0034389	0.014
264	486	GO:0016538	0.014
265	600	GO:0030521	0.014
266	868	GO:0043142	0.014
267	1360	hsa03420	0.014
268	319	GO:0007094	0.014
269	827	GO:0042054	0.014
270	318	GO:0007093	0.014
271	256	GO:0006270	0.014
272	1242	GO:0071564	0.014
273	1111	GO:0051984	0.014
274	679	GO:0032154	0.014
275	98	GO:0001556	0.014
276	1367	hsa05222	0.014
277	1047	GO:0050680	0.014
278	604	GO:0030660	0.014
279	913	GO:0044464	0.014
280	1094	GO:0051580	0.014
281	1247	GO:0071777	0.014
282	416	GO:0010625	0.014
283	388	GO:0009267	0.014
284	1307	GO:2000045	0.014
285	1103	GO:0051797	0.014
286	991	GO:0046785	0.014
287	1055	GO:0050872	0.014
288	359	GO:0008274	0.014
289	662	GO:0031648	0.014
290	836	GO:0042256	0.014
291	488	GO:0016570	0.014
292	779	GO:0035234	0.014
293	1019	GO:0048333	0.014
294	275	GO:0006344	0.014
295	6	GO:0000070	0.014
296	633	GO:0031301	0.014
297	298	GO:0007018	0.014
298	268	GO:0006310	0.014
299	266	GO:0006303	0.014
300	501	GO:0016805	0.014
301	1265	GO:0072221	0.014
302	673	GO:0032133	0.014
303	257	GO:0006271	0.014
304	235	GO:0005828	0.014
305	1264	GO:0072138	0.014
306	885	GO:0043497	0.014
307	1237	GO:0071459	0.014
308	126	GO:0002083	0.014
309	1178	GO:0061338	0.014
310	1000	GO:0047293	0.014
311	449	GO:0015125	0.014
312	1364	hsa05200	0.014
313	344	GO:0007507	0.014
314	958	GO:0045839	0.013
315	18	GO:0000087	0.013
316	31	GO:0000236	0.013
317	849	GO:0042634	0.013
318	1334	GO:2000774	0.013
319	1001	GO:0047485	0.013
320	609	GO:0030857	0.013
321	100	GO:0001673	0.013
322	832	GO:0042162	0.013
323	374	GO:0008574	0.013
324	1267	GO:0072278	0.013
325	902	GO:0043697	0.013
326	1086	GO:0051488	0.013
327	203	GO:0005178	0.013
328	1361	hsa04114	0.013
329	1005	GO:0048015	0.013
330	701	GO:0032794	0.013
331	933	GO:0045502	0.013
332	32	GO:0000278	0.013
333	56	GO:0000778	0.013
334	527	GO:0019237	0.013
335	1298	GO:1900212	0.013
336	1319	GO:2000594	0.013
337	912	GO:0044430	0.013
338	821	GO:0039003	0.013
339	1300	GO:1900218	0.013
340	1299	GO:1900215	0.013
341	1271	GO:0072305	0.013
342	119	GO:0002009	0.013
343	45	GO:0000712	0.013
344	1206	GO:0070557	0.013
345	828	GO:0042058	0.013
346	102	GO:0001739	0.013
347	941	GO:0045682	0.013
348	542	GO:0021592	0.013
349	223	GO:0005694	0.013
350	1007	GO:0048096	0.013
351	926	GO:0045180	0.013
352	962	GO:0045862	0.013
353	1105	GO:0051880	0.013
354	1261	GO:0072133	0.013
355	1245	GO:0071681	0.013
356	490	GO:0016572	0.013
357	839	GO:0042393	0.013
358	965	GO:0045892	0.013
359	532	GO:0019901	0.013
360	522	GO:0019102	0.013
361	1218	GO:0070974	0.013
362	1150	GO:0060520	0.013
363	945	GO:0045720	0.013
364	791	GO:0035402	0.013
365	793	GO:0035407	0.013
366	172	GO:0004386	0.013
367	1290	GO:0090307	0.013
368	946	GO:0045726	0.013
369	9	GO:0000075	0.013
370	78	GO:0000939	0.013
371	1096	GO:0051649	0.013
372	385	GO:0009186	0.013
373	121	GO:0002039	0.013
374	51	GO:0000733	0.013
375	52	GO:0000739	0.013
376	286	GO:0006513	0.012
377	1066	GO:0051233	0.012
378	1347	hsa05220	0.012
379	843	GO:0042487	0.012
380	841	GO:0042415	0.012
381	1006	GO:0048024	0.012
382	1275	GO:0072428	0.012
383	732	GO:0033596	0.012
384	376	GO:0008608	0.012
385	4	GO:0000019	0.012
386	928	GO:0045197	0.012
387	1116	GO:0055013	0.012
388	302	GO:0007051	0.012
389	848	GO:0042585	0.012
390	54	GO:0000776	0.012
391	627	GO:0031116	0.012
392	670	GO:0032091	0.012
393	712	GO:0032993	0.012
394	831	GO:0042159	0.012
395	502	GO:0016817	0.012
396	1231	GO:0071285	0.012
397	683	GO:0032204	0.012
398	972	GO:0045945	0.012
399	1089	GO:0051534	0.012
400	442	GO:0014037	0.012
401	195	GO:0005010	0.012
402	585	GO:0030291	0.012
403	412	GO:0010485	0.012
404	1227	GO:0071173	0.012
405	924	GO:0045175	0.012
406	14	GO:0000082	0.012
407	1349	hsa03030	0.012
408	1048	GO:0050681	0.012
409	1092	GO:0051574	0.012
410	715	GO:0033145	0.012
411	1280	GO:0085020	0.012
412	400	GO:0010159	0.012
413	723	GO:0033262	0.012
414	288	GO:0006865	0.012
415	1069	GO:0051271	0.012
416	692	GO:0032403	0.012
417	180	GO:0004525	0.012
418	523	GO:0019104	0.012
419	767	GO:0035064	0.012
420	1002	GO:0047743	0.012
421	480	GO:0016446	0.012
422	327	GO:0007127	0.012
423	1056	GO:0051010	0.012
424	639	GO:0031427	0.012
425	260	GO:0006282	0.012
426	1181	GO:0061383	0.012
427	1127	GO:0060068	0.012
428	1098	GO:0051668	0.012
429	855	GO:0042992	0.012
430	1241	GO:0071559	0.012
431	190	GO:0004799	0.012
432	1079	GO:0051329	0.012
433	976	GO:0046078	0.012
434	138	GO:0003062	0.012
435	249	GO:0006231	0.012
436	702	GO:0032810	0.012
437	303	GO:0007052	0.012
438	384	GO:0009157	0.012
439	521	GO:0019088	0.012
440	726	GO:0033504	0.012
441	1097	GO:0051661	0.012
442	953	GO:0045769	0.012
443	1075	GO:0051301	0.012
444	1221	GO:0071065	0.012
445	1353	hsa03440	0.012
446	149	GO:0003678	0.012
447	721	GO:0033205	0.012
448	87	GO:0001042	0.012
449	444	GO:0014044	0.012
450	1131	GO:0060209	0.012
451	1063	GO:0051154	0.012
452	186	GO:0004712	0.012
453	1366	hsa05215	0.012
454	881	GO:0043398	0.011
455	563	GO:0022027	0.011
456	321	GO:0007096	0.011
457	1279	GO:0080134	0.011
458	1288	GO:0090219	0.011
459	357	GO:0008207	0.011
460	1028	GO:0048683	0.011
461	1101	GO:0051754	0.011
462	274	GO:0006343	0.011
463	1328	GO:2000655	0.011
464	1332	GO:2000757	0.011
465	788	GO:0035358	0.011
466	1359	hsa04330	0.011
467	750	GO:0034391	0.011
468	762	GO:0034979	0.011
469	637	GO:0031393	0.011
470	1317	GO:2000480	0.011
471	645	GO:0031508	0.011
472	614	GO:0030953	0.011
473	3	GO:0000018	0.011
474	80	GO:0000942	0.011
475	134	GO:0002520	0.011
476	21	GO:0000090	0.011
477	1316	GO:2000401	0.011
478	1155	GO:0060599	0.011
479	1080	GO:0051345	0.011
480	193	GO:0004882	0.011
481	1151	GO:0060564	0.011
482	473	GO:0016308	0.011
483	973	GO:0045950	0.011
484	605	GO:0030690	0.011
485	393	GO:0009411	0.011
486	1073	GO:0051298	0.011
487	897	GO:0043586	0.011
488	704	GO:0032869	0.011
489	38	GO:0000403	0.011
490	1051	GO:0050773	0.011
491	990	GO:0046683	0.011
492	512	GO:0017136	0.011
493	162	GO:0003906	0.011
494	124	GO:0002070	0.011
495	322	GO:0007098	0.011
496	182	GO:0004659	0.011
497	42	GO:0000444	0.011
498	160	GO:0003777	0.011
499	283	GO:0006470	0.011
500	799	GO:0035518	0.011
501	276	GO:0006346	0.011
502	156	GO:0003712	0.011
503	194	GO:0004955	0.011
504	1159	GO:0060694	0.011
505	943	GO:0045713	0.011
506	686	GO:0032288	0.011
507	28	GO:0000212	0.011
508	665	GO:0031937	0.011
509	857	GO:0043009	0.011
510	1285	GO:0090096	0.011
511	471	GO:0016242	0.011
512	910	GO:0044346	0.011
513	1342	GO:2001220	0.011
514	1269	GO:0072284	0.011
515	352	GO:0008094	0.011
516	1208	GO:0070633	0.011
517	353	GO:0008134	0.011
518	1187	GO:0070087	0.011
519	1149	GO:0060433	0.011
520	786	GO:0035331	0.011
521	372	GO:0008424	0.011
522	995	GO:0046921	0.011
523	863	GO:0043112	0.011
524	777	GO:0035195	0.011
525	820	GO:0036071	0.011
526	1325	GO:2000637	0.011
527	1248	GO:0071778	0.011
528	869	GO:0043148	0.011
529	765	GO:0035021	0.011
530	152	GO:0003689	0.011
531	997	GO:0046969	0.011
532	744	GO:0034190	0.011
533	204	GO:0005198	0.011
534	769	GO:0035098	0.011
535	998	GO:0046985	0.011
536	187	GO:0004721	0.011
537	866	GO:0043138	0.01
538	1041	GO:0048878	0.01
539	332	GO:0007160	0.01
540	870	GO:0043175	0.01
541	840	GO:0042412	0.01
542	879	GO:0043368	0.01
543	457	GO:0015327	0.01
544	503	GO:0016818	0.01
545	60	GO:0000783	0.01
546	531	GO:0019900	0.01
547	1091	GO:0051573	0.01
548	420	GO:0010718	0.01
549	1024	GO:0048565	0.01
550	443	GO:0014040	0.01
551	880	GO:0043393	0.01
552	695	GO:0032436	0.01
553	806	GO:0035709	0.01
554	807	GO:0035712	0.01
555	1301	GO:1900281	0.01
556	805	GO:0035708	0.01
557	129	GO:0002215	0.01
558	1255	GO:0071954	0.01
559	988	GO:0046661	0.01
560	409	GO:0010468	0.01
561	583	GO:0030284	0.01
562	1153	GO:0060574	0.01
563	518	GO:0018393	0.01
564	396	GO:0009912	0.01
565	1304	GO:2000008	0.01
566	176	GO:0004468	0.01
567	955	GO:0045792	0.01
568	1365	hsa04914	0.01
569	105	GO:0001832	0.01
570	1113	GO:0051988	0.01
571	243	GO:0005958	0.01
572	507	GO:0016922	0.01
573	1270	GO:0072300	0.01
574	170	GO:0004137	0.01
575	977	GO:0046092	0.01
576	29	GO:0000226	0.01
577	699	GO:0032548	0.01
578	110	GO:0001848	0.01
579	668	GO:0032025	0.01
580	1162	GO:0060740	0.01
581	833	GO:0042176	0.01
582	883	GO:0043409	0.01
583	202	GO:0005176	0.01
584	657	GO:0031625	0.01
585	141	GO:0003167	0.01
586	1171	GO:0060931	0.01
587	1085	GO:0051444	0.01
588	1257	GO:0072044	0.01
589	1110	GO:0051983	0.01
590	780	GO:0035261	0.01
591	1286	GO:0090166	0.01
592	557	GO:0021885	0.01
593	287	GO:0006760	0.01
594	247	GO:0006109	0.01
595	1201	GO:0070438	0.01
596	197	GO:0005080	0.01
597	996	GO:0046929	0.01
598	899	GO:0043610	0.01
599	75	GO:0000910	0.01
600	111	GO:0001885	0.01
601	458	GO:0015630	0.01
602	272	GO:0006335	0.01
603	759	GO:0034720	0.01
604	698	GO:0032535	0.01
605	713	GO:0033032	0.01
606	1104	GO:0051800	0.01
607	1335	GO:2000808	0.01
608	781	GO:0035264	0.01
609	663	GO:0031658	0.01
610	1031	GO:0048714	0.01
611	1295	GO:0097107	0.01
612	1099	GO:0051717	0.01
613	1284	GO:0090071	0.01
614	730	GO:0033561	0.01
615	1281	GO:0090003	0.01
616	245	GO:0006044	0.01
617	543	GO:0021612	0.01
618	595	GO:0030500	0.01
619	1032	GO:0048730	0.01
620	659	GO:0031641	0.01
621	877	GO:0043281	0.01
622	937	GO:0045624	0.01
623	671	GO:0032095	0.01
624	131	GO:0002328	0.01
625	559	GO:0021897	0.01
626	942	GO:0045685	0.01
627	1054	GO:0050849	0.01
628	539	GO:0021542	0.01
629	1179	GO:0061351	0.01
630	1130	GO:0060177	0.01
631	1050	GO:0050767	0.01
632	1278	GO:0072686	0.01
633	576	GO:0030127	0.01
634	206	GO:0005488	0.01
635	1018	GO:0048332	0.01
636	1036	GO:0048812	0.01
637	932	GO:0045475	0.01
638	1139	GO:0060318	0.01
639	551	GO:0021761	0.01
640	125	GO:0002079	0.01
641	1049	GO:0050713	0.01
642	1141	GO:0060354	0.01
643	745	GO:0034191	0.01
644	747	GO:0034261	0.01
645	1014	GO:0048210	0.01
646	993	GO:0046826	0.01
647	674	GO:0032137	0.009
648	1004	GO:0048009	0.009
649	34	GO:0000307	0.009
650	183	GO:0004674	0.009
651	646	GO:0031523	0.009
652	1180	GO:0061360	0.009
653	1252	GO:0071895	0.009
654	861	GO:0043067	0.009
655	1251	GO:0071866	0.009
656	430	GO:0010883	0.009
657	1320	GO:2000597	0.009
658	545	GO:0021633	0.009
659	546	GO:0021650	0.009
660	886	GO:0043504	0.009
661	661	GO:0031647	0.009
662	858	GO:0043015	0.009
663	112	GO:0001889	0.009
664	768	GO:0035065	0.009
665	1172	GO:0061010	0.009
666	171	GO:0004146	0.009
667	1289	GO:0090267	0.009
668	392	GO:0009346	0.009
669	233	GO:0005819	0.009
670	756	GO:0034648	0.009
671	309	GO:0007067	0.009
672	830	GO:0042127	0.009
673	201	GO:0005173	0.009
674	154	GO:0003696	0.009
675	1045	GO:0050658	0.009
676	619	GO:0031054	0.009
677	842	GO:0042471	0.009
678	484	GO:0016480	0.009
679	331	GO:0007144	0.009
680	612	GO:0030892	0.009
681	1331	GO:2000744	0.009
682	46	GO:0000722	0.009
683	263	GO:0006298	0.009
684	914	GO:0045023	0.009
685	312	GO:0007080	0.009
686	168	GO:0003985	0.009
687	681	GO:0032201	0.009
688	86	GO:0001011	0.009
689	219	GO:0005663	0.009
690	91	GO:0001093	0.009
691	90	GO:0001087	0.009
692	1169	GO:0060789	0.009
693	1058	GO:0051096	0.009
694	475	GO:0016314	0.009
695	470	GO:0016202	0.009
696	448	GO:0014912	0.009
697	733	GO:0033601	0.009
698	1109	GO:0051974	0.009
699	429	GO:0010835	0.009
700	1228	GO:0071253	0.009
701	463	GO:0015807	0.009
702	1194	GO:0070317	0.009
703	1039	GO:0048857	0.009
704	552	GO:0021773	0.009
705	1357	hsa03450	0.009
706	961	GO:0045859	0.009
707	135	GO:0002821	0.009
708	667	GO:0031998	0.009
709	435	GO:0010972	0.009
710	55	GO:0000777	0.009
711	433	GO:0010925	0.009
712	432	GO:0010920	0.009
713	608	GO:0030845	0.009
714	328	GO:0007129	0.009
715	1138	GO:0060305	0.009
716	1207	GO:0070560	0.009
717	772	GO:0035117	0.009
718	891	GO:0043539	0.009
719	927	GO:0045190	0.009
720	1283	GO:0090068	0.009
721	1192	GO:0070306	0.009
722	1239	GO:0071480	0.009
723	537	GO:0021522	0.009
724	214	GO:0005637	0.009
725	1017	GO:0048318	0.009
726	1256	GO:0072017	0.009
727	1302	GO:1900625	0.009
728	333	GO:0007173	0.009
729	1177	GO:0061302	0.009
730	1025	GO:0048589	0.009
731	611	GO:0030879	0.009
732	1243	GO:0071565	0.009
733	24	GO:0000117	0.009
734	1064	GO:0051168	0.009
735	401	GO:0010165	0.009
736	213	GO:0005635	0.009
737	1061	GO:0051106	0.009
738	428	GO:0010834	0.009
739	1043	GO:0050431	0.009
740	50	GO:0000731	0.009
741	524	GO:0019208	0.009
742	554	GO:0021796	0.009
743	544	GO:0021631	0.009
744	790	GO:0035371	0.009
745	571	GO:0030030	0.009
746	329	GO:0007131	0.009
747	630	GO:0031262	0.009
748	185	GO:0004693	0.009
749	175	GO:0004450	0.009
750	246	GO:0006097	0.009
751	1065	GO:0051170	0.009
752	166	GO:0003953	0.009
753	1344	hsa03410	0.009
754	894	GO:0043564	0.009
755	262	GO:0006297	0.009
756	323	GO:0007100	0.009
757	84	GO:0000988	0.009
758	907	GO:0043997	0.009
759	74	GO:0000819	0.009
760	1	GO:0000012	0.009
761	764	GO:0035020	0.009
762	939	GO:0045664	0.009
763	1173	GO:0061029	0.009
764	974	GO:0045955	0.009
765	35	GO:0000320	0.009
766	1174	GO:0061044	0.008
767	1229	GO:0071258	0.008
768	625	GO:0031104	0.008
769	795	GO:0035491	0.008
770	1215	GO:0070887	0.008
771	570	GO:0030010	0.008
772	413	GO:0010569	0.008
773	229	GO:0005737	0.008
774	929	GO:0045295	0.008
775	1197	GO:0070410	0.008
776	1012	GO:0048168	0.008
777	547	GO:0021660	0.008
778	548	GO:0021666	0.008
779	789	GO:0035359	0.008
780	140	GO:0003160	0.008
781	342	GO:0007440	0.008
782	1184	GO:0061419	0.008
783	144	GO:0003270	0.008
784	536	GO:0021515	0.008
785	447	GO:0014807	0.008
786	143	GO:0003264	0.008
787	106	GO:0001833	0.008
788	838	GO:0042326	0.008
789	63	GO:0000790	0.008
790	414	GO:0010592	0.008
791	1145	GO:0060390	0.008
792	970	GO:0045931	0.008
793	741	GO:0034063	0.008
794	1266	GO:0072229	0.008
795	407	GO:0010457	0.008
796	801	GO:0035522	0.008
797	382	GO:0008853	0.008
798	798	GO:0035517	0.008
799	804	GO:0035566	0.008
800	513	GO:0017145	0.008
801	217	GO:0005654	0.008
802	424	GO:0010792	0.008
803	634	GO:0031333	0.008
804	1260	GO:0072125	0.008
805	517	GO:0018205	0.008
806	893	GO:0043550	0.008
807	403	GO:0010216	0.008
808	911	GO:0044428	0.008
809	954	GO:0045786	0.008
810	740	GO:0034056	0.008
811	561	GO:0022004	0.008
812	1303	GO:2000002	0.008
813	541	GO:0021588	0.008
814	278	GO:0006353	0.008
815	887	GO:0043515	0.008
816	994	GO:0046903	0.008
817	462	GO:0015755	0.008
818	431	GO:0010906	0.008
819	1129	GO:0060113	0.008
820	794	GO:0035428	0.008
821	453	GO:0015149	0.008
822	436	GO:0010994	0.008
823	968	GO:0045916	0.008
824	2	GO:0000014	0.008
825	509	GO:0017053	0.008
826	1021	GO:0048471	0.008
827	1362	hsa04115	0.008
828	365	GO:0008340	0.008
829	117	GO:0001953	0.008
830	735	GO:0033629	0.008
831	1315	GO:2000377	0.008
832	1128	GO:0060074	0.008
833	844	GO:0042524	0.008
834	1345	hsa05219	0.008
835	851	GO:0042771	0.008
836	860	GO:0043066	0.008
837	377	GO:0008629	0.008
838	1236	GO:0071456	0.008
839	508	GO:0017015	0.008
840	979	GO:0046332	0.008
841	658	GO:0031627	0.008
842	809	GO:0035846	0.008
843	1268	GO:0072283	0.008
844	452	GO:0015136	0.008
845	757	GO:0034649	0.008
846	920	GO:0045132	0.008
847	1212	GO:0070816	0.008
848	810	GO:0035847	0.008
849	908	GO:0044030	0.008
850	1259	GO:0072077	0.008
851	811	GO:0035849	0.008
852	461	GO:0015739	0.008
853	812	GO:0035852	0.008
854	459	GO:0015727	0.008
855	607	GO:0030748	0.008
856	450	GO:0015129	0.008
857	572	GO:0030037	0.008
858	854	GO:0042941	0.008
859	814	GO:0035873	0.008
860	370	GO:0008419	0.008
861	824	GO:0040017	0.008
862	925	GO:0045178	0.008
863	588	GO:0030336	0.008
864	296	GO:0006978	0.008
865	923	GO:0045171	0.008
866	94	GO:0001300	0.008
867	33	GO:0000293	0.008
868	703	GO:0032859	0.008
869	553	GO:0021785	0.008
870	511	GO:0017123	0.008
871	727	GO:0033549	0.008
872	1183	GO:0061418	0.008
873	729	GO:0033558	0.008
874	1355	hsa05218	0.008
875	728	GO:0033553	0.008
876	1368	hsa04350	0.008
877	493	GO:0016581	0.008
878	208	GO:0005518	0.008
879	1163	GO:0060748	0.008
880	685	GO:0032286	0.008
881	497	GO:0016604	0.008
882	526	GO:0019217	0.008
883	71	GO:0000801	0.008
884	345	GO:0007569	0.008
885	1062	GO:0051146	0.008
886	445	GO:0014067	0.008
887	83	GO:0000987	0.008
888	350	GO:0008054	0.008
889	1200	GO:0070419	0.008
890	491	GO:0016574	0.008
891	1351	hsa05213	0.008
892	696	GO:0032444	0.008
893	917	GO:0045109	0.008
894	1084	GO:0051443	0.008
895	992	GO:0046825	0.008
896	1093	GO:0051575	0.008
897	936	GO:0045616	0.008
898	297	GO:0007004	0.008
899	1356	hsa03430	0.008
900	465	GO:0015891	0.008
901	647	GO:0031527	0.008
902	763	GO:0034983	0.008
903	101	GO:0001701	0.008
904	1354	hsa05166	0.008
905	1314	GO:2000346	0.008
906	1312	GO:2000144	0.008
907	1326	GO:2000639	0.008
908	1176	GO:0061198	0.007
909	446	GO:0014740	0.007
910	1161	GO:0060710	0.007
911	49	GO:0000730	0.007
912	1273	GO:0072365	0.007
913	464	GO:0015827	0.007
914	636	GO:0031343	0.007
915	618	GO:0031053	0.007
916	200	GO:0005160	0.007
917	301	GO:0007050	0.007
918	343	GO:0007500	0.007
919	694	GO:0032407	0.007
920	915	GO:0045069	0.007
921	540	GO:0021569	0.007
922	174	GO:0004415	0.007
923	934	GO:0045542	0.007
924	1168	GO:0060770	0.007
925	664	GO:0031860	0.007
926	590	GO:0030362	0.007
927	584	GO:0030289	0.007
928	1170	GO:0060821	0.007
929	248	GO:0006203	0.007
930	802	GO:0035539	0.007
931	369	GO:0008413	0.007
932	167	GO:0003964	0.007
933	159	GO:0003721	0.007
934	568	GO:0022616	0.007
935	7	GO:0000072	0.007
936	1186	GO:0070034	0.007
937	290	GO:0006921	0.007
938	1034	GO:0048754	0.007
939	419	GO:0010669	0.007
940	192	GO:0004861	0.007
941	573	GO:0030056	0.007
942	1216	GO:0070932	0.007
943	1348	hsa05210	0.007
944	108	GO:0001836	0.007
945	1240	GO:0071535	0.007
946	425	GO:0010800	0.007
947	116	GO:0001939	0.007
948	109	GO:0001841	0.007
949	482	GO:0016458	0.007
950	864	GO:0043125	0.007
951	1310	GO:2000121	0.007
952	1313	GO:2000145	0.007
953	267	GO:0006309	0.007
954	181	GO:0004527	0.007
955	282	GO:0006469	0.007
956	904	GO:0043967	0.007
957	1276	GO:0072563	0.007
958	1309	GO:2000060	0.007
959	938	GO:0045656	0.007
960	1078	GO:0051322	0.007
961	481	GO:0016447	0.007
962	1258	GO:0072050	0.007
963	1203	GO:0070508	0.007
964	61	GO:0000784	0.007
965	1037	GO:0048813	0.007
966	533	GO:0019904	0.007
967	755	GO:0034644	0.007
968	96	GO:0001542	0.007
969	421	GO:0010719	0.007
970	474	GO:0016310	0.007
971	89	GO:0001085	0.007
972	597	GO:0030511	0.007
973	23	GO:0000110	0.007
974	454	GO:0015171	0.007
975	139	GO:0003131	0.007
976	796	GO:0035500	0.007
977	617	GO:0031052	0.007
978	819	GO:0035987	0.007
979	1338	GO:2001033	0.007
980	816	GO:0035978	0.007
981	644	GO:0031507	0.007
982	797	GO:0035501	0.007
983	1329	GO:2000685	0.007
984	361	GO:0008280	0.007
985	1142	GO:0060356	0.007
986	1074	GO:0051299	0.007
987	620	GO:0031056	0.007
988	145	GO:0003283	0.007
989	960	GO:0045843	0.007
990	782	GO:0035284	0.007
991	380	GO:0008634	0.007
992	655	GO:0031616	0.007
993	221	GO:0005677	0.007
994	808	GO:0035748	0.007
995	525	GO:0019212	0.007
996	64	GO:0000792	0.007
997	1246	GO:0071732	0.007
998	1165	GO:0060765	0.007
999	746	GO:0034244	0.007
1000	1136	GO:0060253	0.007
1001	1339	GO:2001038	0.007
1002	771	GO:0035104	0.007
1003	1220	GO:0071044	0.007
1004	515	GO:0018105	0.007
1005	123	GO:0002043	0.007
1006	1198	GO:0070411	0.007
1007	574	GO:0030098	0.007
1008	334	GO:0007183	0.007
1009	1358	hsa05223	0.007
1010	986	GO:0046605	0.007
1011	477	GO:0016324	0.007
1012	853	GO:0042826	0.007
1013	335	GO:0007219	0.007
1014	1003	GO:0047800	0.007
1015	1244	GO:0071585	0.007
1016	227	GO:0005724	0.007
1017	1235	GO:0071455	0.007
1018	1341	GO:2001141	0.007
1019	122	GO:0002040	0.007
1020	626	GO:0031110	0.007
1021	981	GO:0046474	0.007
1022	427	GO:0010804	0.006
1023	1107	GO:0051898	0.006
1024	1175	GO:0061045	0.006
1025	1190	GO:0070254	0.006
1026	565	GO:0022408	0.006
1027	624	GO:0031102	0.006
1028	85	GO:0001010	0.006
1029	16	GO:0000084	0.006
1030	239	GO:0005881	0.006
1031	67	GO:0000795	0.006
1032	379	GO:0008633	0.006
1033	27	GO:0000183	0.006
1034	177	GO:0004518	0.006
1035	120	GO:0002011	0.006
1036	829	GO:0042060	0.006
1037	684	GO:0032214	0.006
1038	95	GO:0001309	0.006
1039	862	GO:0043111	0.006
1040	846	GO:0042552	0.006
1041	410	GO:0010469	0.006
1042	1124	GO:0060039	0.006
1043	813	GO:0035855	0.006
1044	957	GO:0045799	0.006
1045	434	GO:0010966	0.006
1046	1144	GO:0060375	0.006
1047	1132	GO:0060217	0.006
1048	720	GO:0033193	0.006
1049	368	GO:0008409	0.006
1050	852	GO:0042802	0.006
1051	1071	GO:0051290	0.006
1052	871	GO:0043219	0.006
1053	577	GO:0030145	0.006
1054	1052	GO:0050820	0.006
1055	889	GO:0043518	0.006
1056	1137	GO:0060291	0.006
1057	273	GO:0006338	0.006
1058	818	GO:0035986	0.006
1059	815	GO:0035887	0.006
1060	1294	GO:0090402	0.006
1061	817	GO:0035985	0.006
1062	341	GO:0007420	0.006
1063	610	GO:0030870	0.006
1064	496	GO:0016589	0.006
1065	737	GO:0033674	0.006
1066	641	GO:0031464	0.006
1067	225	GO:0005719	0.006
1068	1217	GO:0070933	0.006
1069	426	GO:0010801	0.006
1070	151	GO:0003684	0.006
1071	408	GO:0010458	0.006
1072	191	GO:0004843	0.006
1073	158	GO:0003714	0.006
1074	1160	GO:0060706	0.006
1075	1148	GO:0060422	0.006
1076	423	GO:0010771	0.006
1077	1189	GO:0070215	0.006
1078	351	GO:0008089	0.006
1079	472	GO:0016301	0.006
1080	1369	hsa05216	0.006
1081	555	GO:0021797	0.006
1082	678	GO:0032147	0.006
1083	719	GO:0033186	0.006
1084	216	GO:0005652	0.006
1085	1060	GO:0051098	0.006
1086	103	GO:0001783	0.006
1087	1022	GO:0048477	0.006
1088	654	GO:0031575	0.006
1089	736	GO:0033673	0.006
1090	751	GO:0034446	0.006
1091	519	GO:0019005	0.006
1092	299	GO:0007019	0.006
1093	909	GO:0044154	0.006
1094	1287	GO:0090200	0.006
1095	738	GO:0033683	0.006
1096	25	GO:0000132	0.006
1097	567	GO:0022614	0.006
1098	1277	GO:0072659	0.006
1099	210	GO:0005524	0.006
1100	161	GO:0003878	0.006
1101	1167	GO:0060768	0.006
1102	147	GO:0003334	0.006
1103	606	GO:0030705	0.006
1104	1337	GO:2001022	0.006
1105	944	GO:0045717	0.006
1106	529	GO:0019836	0.006
1107	155	GO:0003697	0.006
1108	1249	GO:0071813	0.006
1109	1225	GO:0071158	0.006
1110	1166	GO:0060766	0.006
1111	850	GO:0042770	0.006
1112	783	GO:0035303	0.006
1113	386	GO:0009234	0.006
1114	293	GO:0006958	0.006
1115	770	GO:0035102	0.006
1116	485	GO:0016514	0.006
1117	643	GO:0031497	0.006
1118	560	GO:0021978	0.006
1119	150	GO:0003682	0.006
1120	220	GO:0005667	0.005
1121	707	GO:0032880	0.005
1122	580	GO:0030221	0.005
1123	107	GO:0001835	0.005
1124	895	GO:0043566	0.005
1125	230	GO:0005741	0.005
1126	132	GO:0002430	0.005
1127	242	GO:0005912	0.005
1128	1336	GO:2001014	0.005
1129	884	GO:0043422	0.005
1130	599	GO:0030520	0.005
1131	280	GO:0006461	0.005
1132	930	GO:0045444	0.005
1133	892	GO:0043542	0.005
1134	865	GO:0043130	0.005
1135	394	GO:0009791	0.005
1136	113	GO:0001932	0.005
1137	931	GO:0045445	0.005
1138	114	GO:0001933	0.005
1139	479	GO:0016442	0.005
1140	179	GO:0004523	0.005
1141	1330	GO:2000737	0.005
1142	980	GO:0046439	0.005
1143	1274	GO:0072404	0.005
1144	603	GO:0030641	0.005
1145	1182	GO:0061386	0.005
1146	906	GO:0043973	0.005
1147	451	GO:0015132	0.005
1148	787	GO:0035332	0.005
1149	460	GO:0015732	0.005
1150	514	GO:0017172	0.005
1151	81	GO:0000972	0.005
1152	1340	GO:2001111	0.005
1153	22	GO:0000097	0.005
1154	566	GO:0022607	0.005
1155	650	GO:0031536	0.005
1156	499	GO:0016653	0.005
1157	1122	GO:0055108	0.005
1158	1297	GO:1900037	0.005
1159	455	GO:0015175	0.005
1160	137	GO:0003014	0.005
1161	346	GO:0007622	0.005
1162	146	GO:0003333	0.005
1163	236	GO:0005871	0.005
1164	469	GO:0016075	0.005
1165	395	GO:0009898	0.005
1166	390	GO:0009314	0.005
1167	734	GO:0033627	0.005
1168	562	GO:0022011	0.005
1169	381	GO:0008637	0.005
1170	856	GO:0042993	0.005
1171	439	GO:0014002	0.005
1172	535	GO:0021510	0.005
1173	642	GO:0031490	0.005
1174	456	GO:0015179	0.005
1175	285	GO:0006482	0.005
1176	371	GO:0008420	0.005
1177	358	GO:0008266	0.005
1178	494	GO:0016584	0.005
1179	1263	GO:0072136	0.005
1180	700	GO:0032587	0.005
1181	510	GO:0017108	0.005
1182	616	GO:0030983	0.005
1183	682	GO:0032203	0.005
1184	666	GO:0031952	0.005
1185	748	GO:0034333	0.005
1186	718	GO:0033158	0.005
1187	903	GO:0043923	0.005
1188	1352	hsa05214	0.005
1189	363	GO:0008285	0.005
1190	438	GO:0012507	0.005
1191	1327	GO:2000648	0.005
1192	951	GO:0045746	0.005
1193	1363	hsa05212	0.005
1194	905	GO:0043968	0.005
1195	628	GO:0031175	0.005
1196	878	GO:0043297	0.005
1197	338	GO:0007281	0.005
1198	1057	GO:0051054	0.005
1199	205	GO:0005432	0.005
1200	234	GO:0005827	0.005
1201	157	GO:0003713	0.005
1202	277	GO:0006351	0.005
1203	602	GO:0030618	0.005
1204	1157	GO:0060685	0.005
1205	1199	GO:0070412	0.005
1206	873	GO:0043234	0.005
1207	492	GO:0016579	0.005
1208	99	GO:0001578	0.005
1209	104	GO:0001829	0.005
1210	93	GO:0001103	0.005
1211	1234	GO:0071407	0.005
1212	638	GO:0031398	0.005
1213	92	GO:0001102	0.005
1214	1238	GO:0071479	0.005
1215	1191	GO:0070301	0.005
1216	1038	GO:0048854	0.005
1217	949	GO:0045737	0.005
1218	569	GO:0023014	0.005
1219	1321	GO:2000612	0.005
1220	1082	GO:0051387	0.004
1221	271	GO:0006333	0.004
1222	284	GO:0006476	0.004
1223	215	GO:0005639	0.004
1224	978	GO:0046329	0.004
1225	705	GO:0032873	0.004
1226	711	GO:0032956	0.004
1227	373	GO:0008543	0.004
1228	1135	GO:0060252	0.004
1229	349	GO:0008045	0.004
1230	1205	GO:0070531	0.004
1231	859	GO:0043065	0.004
1232	1010	GO:0048146	0.004
1233	1009	GO:0048145	0.004
1234	142	GO:0003183	0.004
1235	115	GO:0001934	0.004
1236	835	GO:0042246	0.004
1237	596	GO:0030506	0.004
1238	550	GO:0021702	0.004
1239	999	GO:0047042	0.004
1240	1291	GO:0090311	0.004
1241	440	GO:0014010	0.004
1242	148	GO:0003677	0.004
1243	1076	GO:0051304	0.004
1244	1044	GO:0050512	0.004
1245	1114	GO:0052739	0.004
1246	1115	GO:0052740	0.004
1247	127	GO:0002193	0.004
1248	1040	GO:0048870	0.004
1249	1088	GO:0051493	0.004
1250	340	GO:0007416	0.004
1251	495	GO:0016585	0.004
1252	289	GO:0006915	0.004
1253	803	GO:0035562	0.004
1254	1147	GO:0060394	0.004
1255	1343	hsa04520	0.004
1256	1029	GO:0048712	0.004
1257	97	GO:0001547	0.004
1258	364	GO:0008324	0.004
1259	1059	GO:0051097	0.004
1260	241	GO:0005911	0.004
1261	761	GO:0034766	0.004
1262	133	GO:0002495	0.004
1263	1133	GO:0060218	0.004
1264	1015	GO:0048255	0.004
1265	1272	GO:0072332	0.004
1266	1213	GO:0070837	0.004
1267	1350	hsa04144	0.004
1268	724	GO:0033300	0.004
1269	1308	GO:2000059	0.004
1270	890	GO:0043525	0.004
1271	178	GO:0004520	0.004
1272	969	GO:0045930	0.004
1273	483	GO:0016477	0.004
1274	476	GO:0016323	0.004
1275	337	GO:0007276	0.004
1276	950	GO:0045739	0.004
1277	82	GO:0000978	0.004
1278	1158	GO:0060693	0.004
1279	367	GO:0008408	0.004
1280	1118	GO:0055062	0.004
1281	901	GO:0043627	0.004
1282	649	GO:0031529	0.004
1283	579	GO:0030219	0.004
1284	982	GO:0046580	0.004
1285	315	GO:0007090	0.004
1286	354	GO:0008139	0.004
1287	355	GO:0008143	0.004
1288	366	GO:0008347	0.004
1289	575	GO:0030100	0.004
1290	615	GO:0030971	0.004
1291	754	GO:0034616	0.004
1292	1035	GO:0048808	0.003
1293	1008	GO:0048102	0.003
1294	1292	GO:0090344	0.003
1295	623	GO:0031100	0.003
1296	1011	GO:0048147	0.003
1297	1053	GO:0050821	0.003
1298	222	GO:0005678	0.003
1299	20	GO:0000089	0.003
1300	1016	GO:0048256	0.003
1301	1042	GO:0050321	0.003
1302	1095	GO:0051635	0.003
1303	1046	GO:0050678	0.003
1304	1083	GO:0051402	0.003
1305	952	GO:0045768	0.003
1306	1143	GO:0060373	0.003
1307	199	GO:0005158	0.003
1308	1164	GO:0060750	0.003
1309	325	GO:0007113	0.003
1310	281	GO:0006468	0.003
1311	1146	GO:0060391	0.003
1312	834	GO:0042177	0.003
1313	1311	GO:2000134	0.003
1314	956	GO:0045793	0.003
1315	876	GO:0043277	0.003
1316	882	GO:0043407	0.003
1317	240	GO:0005901	0.003
1318	1013	GO:0048208	0.003
1319	1068	GO:0051258	0.003
1320	1195	GO:0070373	0.003
1321	651	GO:0031571	0.003
1322	136	GO:0002904	0.003
1323	845	GO:0042551	0.003
1324	238	GO:0005876	0.003
1325	966	GO:0045893	0.003
1326	130	GO:0002320	0.003
1327	26	GO:0000159	0.003
1328	874	GO:0043243	0.003
1329	648	GO:0031528	0.003
1330	1211	GO:0070742	0.003
1331	211	GO:0005540	0.003
1332	948	GO:0045736	0.003
1333	947	GO:0045727	0.003
1334	505	GO:0016874	0.003
1335	397	GO:0009966	0.002
1336	1214	GO:0070848	0.002
1337	226	GO:0005721	0.002
1338	37	GO:0000400	0.002
1339	468	GO:0016050	0.002
1340	629	GO:0031225	0.002
1341	1020	GO:0048340	0.002
1342	1117	GO:0055037	0.002
1343	292	GO:0006957	0.002
1344	1087	GO:0051489	0.002
1345	398	GO:0010001	0.002
1346	231	GO:0005768	0.002
1347	198	GO:0005112	0.002
1348	1106	GO:0051893	0.002
1349	825	GO:0040020	0.002
1350	708	GO:0032886	0.002
1351	336	GO:0007270	0.002
1352	291	GO:0006956	0.002
1353	375	GO:0008601	0.002
1354	593	GO:0030449	0.002
1355	418	GO:0010629	0.002
1356	538	GO:0021537	0.002
1357	188	GO:0004722	0.001
1358	1250	GO:0071850	0.001
1359	1140	GO:0060326	0.001
1360	489	GO:0016571	0.001
1361	404	GO:0010332	0.001
1362	118	GO:0001954	0.001
1363	758	GO:0034713	0.001
1364	516	GO:0018107	0.001
1365	1224	GO:0071157	0.001
1366	837	GO:0042325	0.001
1367	635	GO:0031334	0.001
1368	1196	GO:0070403	0.001

## Sheet: Dateset1 mRMR Table
Order	Feature	Name	Score
1	326	GO:0007126	0.035
2	1120	GO:0055100	0.021
3	1126	GO:0060051	0.014
4	778	GO:0035196	0.014
5	405	GO:0010333	0.013
6	36	GO:0000380	0.013
7	1233	GO:0071398	0.013
8	1027	GO:0048638	0.013
9	836	GO:0042256	0.011
10	964	GO:0045875	0.012
11	501	GO:0016805	0.011
12	888	GO:0043517	0.011
13	706	GO:0032876	0.011
14	749	GO:0034389	0.011
15	916	GO:0045103	0.01
16	288	GO:0006865	0.01
17	165	GO:0003918	0.01
18	1305	GO:2000036	0.011
19	8	GO:0000073	0.01
20	449	GO:0015125	0.01
21	1202	GO:0070463	0.01
22	773	GO:0035140	0.01
23	987	GO:0046632	0.01
24	360	GO:0008278	0.011
25	1178	GO:0061338	0.009
26	604	GO:0030660	0.009
27	1219	GO:0070975	0.009
28	1288	GO:0090219	0.009
29	941	GO:0045682	0.009
30	417	GO:0010626	0.009
31	848	GO:0042585	0.009
32	1100	GO:0051726	0.009
33	357	GO:0008207	0.009
34	126	GO:0002083	0.009
35	308	GO:0007064	0.009
36	1002	GO:0047743	0.008
37	1242	GO:0071564	0.009
38	1102	GO:0051782	0.009
39	549	GO:0021695	0.008
40	184	GO:0004677	0.008
41	119	GO:0002009	0.008
42	306	GO:0007062	0.008
43	975	GO:0046060	0.008
44	725	GO:0033484	0.008
45	822	GO:0040001	0.008
46	1028	GO:0048683	0.008
47	1101	GO:0051754	0.008
48	709	GO:0032909	0.008
49	744	GO:0034190	0.007
50	500	GO:0016799	0.008
51	1041	GO:0048878	0.007
52	633	GO:0031301	0.007
53	595	GO:0030500	0.007
54	406	GO:0010389	0.007
55	717	GO:0033153	0.007
56	622	GO:0031081	0.007
57	716	GO:0033148	0.007
58	372	GO:0008424	0.007
59	1000	GO:0047293	0.007
60	316	GO:0007091	0.007
61	102	GO:0001739	0.007
62	854	GO:0042941	0.007
63	415	GO:0010616	0.007
64	872	GO:0043220	0.007
65	1318	GO:2000481	0.007
66	840	GO:0042412	0.007
67	17	GO:0000085	0.007
68	1006	GO:0048024	0.007
69	442	GO:0014037	0.006
70	399	GO:0010070	0.007
71	800	GO:0035520	0.007
72	760	GO:0034722	0.007
73	110	GO:0001848	0.006
74	672	GO:0032116	0.006
75	383	GO:0009048	0.007
76	1014	GO:0048210	0.006
77	457	GO:0015327	0.006
78	826	GO:0040038	0.006
79	995	GO:0046921	0.006
80	1264	GO:0072138	0.006
81	270	GO:0006312	0.006
82	785	GO:0035330	0.006
83	245	GO:0006044	0.006
84	435	GO:0010972	0.006
85	209	GO:0005521	0.006
86	463	GO:0015807	0.006
87	77	GO:0000922	0.006
88	632	GO:0031298	0.006
89	204	GO:0005198	0.006
90	473	GO:0016308	0.006
91	1232	GO:0071335	0.006
92	849	GO:0042634	0.006
93	69	GO:0000797	0.006
94	138	GO:0003062	0.006
95	1033	GO:0048733	0.006
96	1208	GO:0070633	0.006
97	921	GO:0045143	0.006
98	870	GO:0043175	0.006
99	879	GO:0043368	0.006
100	786	GO:0035331	0.006
101	244	GO:0005971	0.006
102	182	GO:0004659	0.006
103	459	GO:0015727	0.006
104	1049	GO:0050713	0.006
105	389	GO:0009294	0.006
106	1119	GO:0055096	0.006
107	774	GO:0035173	0.006
108	558	GO:0021889	0.006
109	1145	GO:0060390	0.005
110	484	GO:0016480	0.005
111	1306	GO:2000042	0.005
112	863	GO:0043112	0.005
113	1089	GO:0051534	0.005
114	743	GO:0034088	0.005
115	1194	GO:0070317	0.005
116	924	GO:0045175	0.005
117	44	GO:0000710	0.005
118	703	GO:0032859	0.005
119	58	GO:0000780	0.005
120	450	GO:0015129	0.005
121	392	GO:0009346	0.005
122	1188	GO:0070173	0.005
123	722	GO:0033261	0.005
124	1123	GO:0060020	0.005
125	70	GO:0000800	0.005
126	1221	GO:0071065	0.005
127	814	GO:0035873	0.005
128	278	GO:0006353	0.005
129	576	GO:0030127	0.005
130	534	GO:0019985	0.005
131	928	GO:0045197	0.005
132	794	GO:0035428	0.005
133	1026	GO:0048592	0.005
134	1226	GO:0071168	0.005
135	454	GO:0015171	0.005
136	228	GO:0005726	0.005
137	777	GO:0035195	0.005
138	1080	GO:0051345	0.005
139	287	GO:0006760	0.005
140	820	GO:0036071	0.005
141	164	GO:0003917	0.005
142	902	GO:0043697	0.005
143	607	GO:0030748	0.005
144	1072	GO:0051292	0.005
145	912	GO:0044430	0.005
146	687	GO:0032290	0.005
147	511	GO:0017123	0.005
148	422	GO:0010767	0.005
149	1125	GO:0060044	0.005
150	1003	GO:0047800	0.005
151	153	GO:0003691	0.005
152	29	GO:0000226	0.005
153	196	GO:0005072	0.005
154	76	GO:0000915	0.005
155	1170	GO:0060821	0.005
156	166	GO:0003953	0.005
157	48	GO:0000724	0.005
158	1316	GO:2000401	0.005
159	714	GO:0033088	0.005
160	553	GO:0021785	0.005
161	823	GO:0040016	0.005
162	1228	GO:0071253	0.005
163	1331	GO:2000744	0.005
164	79	GO:0000940	0.005
165	1325	GO:2000637	0.005
166	1141	GO:0060354	0.005
167	429	GO:0010835	0.005
168	1185	GO:0065004	0.005
169	30	GO:0000228	0.005
170	557	GO:0021885	0.004
171	141	GO:0003167	0.004
172	125	GO:0002079	0.004
173	832	GO:0042162	0.004
174	799	GO:0035518	0.004
175	867	GO:0043140	0.004
176	824	GO:0040017	0.004
177	585	GO:0030291	0.004
178	1134	GO:0060236	0.004
179	1030	GO:0048713	0.004
180	174	GO:0004415	0.004
181	1177	GO:0061302	0.004
182	552	GO:0021773	0.004
183	370	GO:0008419	0.004
184	283	GO:0006470	0.004
185	452	GO:0015136	0.004
186	827	GO:0042054	0.004
187	841	GO:0042415	0.004
188	253	GO:0006265	0.004
189	925	GO:0045178	0.004
190	556	GO:0021873	0.004
191	702	GO:0032810	0.004
192	1244	GO:0071585	0.004
193	759	GO:0034720	0.004
194	664	GO:0031860	0.004
195	913	GO:0044464	0.004
196	324	GO:0007108	0.004
197	745	GO:0034191	0.004
198	1039	GO:0048857	0.004
199	640	GO:0031436	0.004
200	906	GO:0043973	0.004
201	206	GO:0005488	0.004
202	612	GO:0030892	0.004
203	701	GO:0032794	0.004
204	753	GO:0034509	0.004
205	1333	GO:2000773	0.004
206	203	GO:0005178	0.004
207	660	GO:0031643	0.004
208	453	GO:0015149	0.004
209	572	GO:0030037	0.004
210	933	GO:0045502	0.004
211	170	GO:0004137	0.004
212	295	GO:0006975	0.004
213	451	GO:0015132	0.004
214	886	GO:0043504	0.004
215	1171	GO:0060931	0.004
216	65	GO:0000793	0.004
217	175	GO:0004450	0.004
218	1190	GO:0070254	0.004
219	81	GO:0000972	0.004
220	809	GO:0035846	0.004
221	675	GO:0032139	0.004
222	1142	GO:0060356	0.004
223	1322	GO:2000615	0.004
224	667	GO:0031998	0.004
225	1054	GO:0050849	0.004
226	461	GO:0015739	0.004
227	609	GO:0030857	0.004
228	232	GO:0005815	0.004
229	880	GO:0043393	0.004
230	460	GO:0015732	0.004
231	33	GO:0000293	0.004
232	1243	GO:0071565	0.004
233	40	GO:0000405	0.004
234	423	GO:0010771	0.004
235	207	GO:0005515	0.004
236	613	GO:0030893	0.004
237	566	GO:0022607	0.004
238	388	GO:0009267	0.004
239	1183	GO:0061418	0.003
240	959	GO:0045842	0.003
241	168	GO:0003985	0.003
242	693	GO:0032405	0.003
243	994	GO:0046903	0.003
244	757	GO:0034649	0.003
245	587	GO:0030332	0.003
246	1172	GO:0061010	0.003
247	111	GO:0001885	0.003
248	980	GO:0046439	0.003
249	286	GO:0006513	0.003
250	543	GO:0021612	0.003
251	506	GO:0016891	0.003
252	679	GO:0032154	0.003
253	1094	GO:0051580	0.003
254	767	GO:0035064	0.003
255	1268	GO:0072283	0.003
256	1346	hsa04110	0.003
257	920	GO:0045132	0.003
258	386	GO:0009234	0.003
259	962	GO:0045862	0.003
260	977	GO:0046092	0.003
261	356	GO:0008156	0.003
262	551	GO:0021761	0.003
263	1065	GO:0051170	0.003
264	907	GO:0043997	0.003
265	374	GO:0008574	0.003
266	514	GO:0017172	0.003
267	1154	GO:0060576	0.003
268	146	GO:0003333	0.003
269	313	GO:0007088	0.003
270	1081	GO:0051382	0.003
271	806	GO:0035709	0.003
272	603	GO:0030641	0.003
273	279	GO:0006359	0.003
274	1181	GO:0061383	0.003
275	1114	GO:0052739	0.003
276	462	GO:0015755	0.003
277	444	GO:0014044	0.003
278	775	GO:0035174	0.003
279	1056	GO:0051010	0.003
280	400	GO:0010159	0.003
281	441	GO:0014013	0.003
282	968	GO:0045916	0.003
283	590	GO:0030362	0.003
284	1122	GO:0055108	0.003
285	22	GO:0000097	0.003
286	237	GO:0005873	0.003
287	908	GO:0044030	0.003
288	1092	GO:0051574	0.003
289	898	GO:0043596	0.003
290	499	GO:0016653	0.003
291	732	GO:0033596	0.003
292	591	GO:0030422	0.003
293	810	GO:0035847	0.003
294	1115	GO:0052740	0.003
295	1070	GO:0051276	0.003
296	584	GO:0030289	0.003
297	1055	GO:0050872	0.003
298	202	GO:0005176	0.003
299	293	GO:0006958	0.003
300	981	GO:0046474	0.003
301	187	GO:0004721	0.003
302	699	GO:0032548	0.003
303	1103	GO:0051797	0.003
304	1274	GO:0072404	0.003
305	416	GO:0010625	0.003
306	246	GO:0006097	0.003
307	258	GO:0006275	0.003
308	464	GO:0015827	0.003
309	434	GO:0010966	0.003
310	764	GO:0035020	0.003
311	747	GO:0034261	0.003
312	935	GO:0045605	0.003
313	1044	GO:0050512	0.003
314	1259	GO:0072077	0.003
315	831	GO:0042159	0.003
316	1265	GO:0072221	0.003
317	636	GO:0031343	0.003
318	252	GO:0006261	0.003
319	727	GO:0033549	0.003
320	42	GO:0000444	0.003
321	842	GO:0042471	0.003
322	1182	GO:0061386	0.003
323	668	GO:0032025	0.003
324	307	GO:0007063	0.003
325	23	GO:0000110	0.003
326	571	GO:0030030	0.003
327	652	GO:0031572	0.003
328	801	GO:0035522	0.002
329	407	GO:0010457	0.002
330	627	GO:0031116	0.002
331	583	GO:0030284	0.002
332	807	GO:0035712	0.002
333	858	GO:0043015	0.002
334	787	GO:0035332	0.002
335	191	GO:0004843	0.002
336	971	GO:0045943	0.002
337	227	GO:0005724	0.002
338	235	GO:0005828	0.002
339	710	GO:0032916	0.002
340	811	GO:0035849	0.002
341	456	GO:0015179	0.002
342	1296	GO:0097149	0.002
343	1148	GO:0060422	0.002
344	1209	GO:0070683	0.002
345	1069	GO:0051271	0.002
346	1340	GO:2001111	0.002
347	592	GO:0030423	0.002
348	1077	GO:0051310	0.002
349	455	GO:0015175	0.002
350	173	GO:0004407	0.002
351	647	GO:0031527	0.002
352	387	GO:0009263	0.002
353	780	GO:0035261	0.002
354	1312	GO:2000144	0.002
355	828	GO:0042058	0.002
356	12	GO:0000079	0.002
357	371	GO:0008420	0.002
358	772	GO:0035117	0.002
359	1301	GO:1900281	0.002
360	250	GO:0006259	0.002
361	812	GO:0035852	0.002
362	993	GO:0046826	0.002
363	798	GO:0035517	0.002
364	1174	GO:0061044	0.002
365	958	GO:0045839	0.002
366	761	GO:0034766	0.002
367	4	GO:0000019	0.002
368	513	GO:0017145	0.002
369	1043	GO:0050431	0.002
370	254	GO:0006266	0.002
371	741	GO:0034063	0.002
372	766	GO:0035035	0.002
373	438	GO:0012507	0.002
374	330	GO:0007141	0.002
375	60	GO:0000783	0.002
376	1266	GO:0072229	0.002
377	332	GO:0007160	0.002
378	577	GO:0030145	0.002
379	1223	GO:0071141	0.002
380	631	GO:0031297	0.002
381	205	GO:0005432	0.002
382	5	GO:0000022	0.002
383	1334	GO:2000774	0.002
384	1297	GO:1900037	0.002
385	433	GO:0010925	0.002
386	765	GO:0035021	0.002
387	359	GO:0008274	0.002
388	1267	GO:0072278	0.002
389	998	GO:0046985	0.001
390	524	GO:0019208	0.001
391	582	GO:0030263	0.002
392	926	GO:0045180	0.001
393	1203	GO:0070508	0.001
394	999	GO:0047042	0.001
395	1064	GO:0051168	0.001
396	15	GO:0000083	0.002
397	1068	GO:0051258	0.001
398	805	GO:0035708	0.001
399	124	GO:0002070	0.001
400	1076	GO:0051304	0.001
401	507	GO:0016922	0.001
402	594	GO:0030496	0.001
403	967	GO:0045910	0.001
404	792	GO:0035404	0.001
405	364	GO:0008324	0.001
406	1187	GO:0070087	0.001
407	542	GO:0021592	0.001
408	189	GO:0004748	0.001
409	260	GO:0006282	0.001
410	1220	GO:0071044	0.001
411	1193	GO:0070314	0.001
412	686	GO:0032288	0.001
413	162	GO:0003906	0.001
414	525	GO:0019212	0.001
415	396	GO:0009912	0.001
416	486	GO:0016538	0.001
417	1341	GO:2001141	0.001
418	991	GO:0046785	0.001
419	213	GO:0005635	0.001
420	573	GO:0030056	0.001
421	265	GO:0006302	0.001
422	471	GO:0016242	0.001
423	606	GO:0030705	0.001
424	783	GO:0035303	0.001
425	195	GO:0005010	0.001
426	492	GO:0016579	0.001
427	922	GO:0045145	0.001
428	129	GO:0002215	0.001
429	554	GO:0021796	0.001
430	563	GO:0022027	0.001
431	487	GO:0016568	0.001
432	779	GO:0035234	0.001
433	477	GO:0016324	0.001
434	1019	GO:0048333	0.001
435	19	GO:0000088	0.001
436	866	GO:0043138	0.001
437	770	GO:0035102	0.001
438	1229	GO:0071258	0.001
439	1078	GO:0051322	0.001
440	905	GO:0043968	0.001
441	784	GO:0035312	0.001
442	540	GO:0021569	0.001
443	427	GO:0010804	0.001
444	645	GO:0031508	0.001
445	917	GO:0045109	0.001
446	596	GO:0030506	0.001
447	626	GO:0031110	0.001
448	1255	GO:0071954	0.001
449	414	GO:0010592	0.001
450	790	GO:0035371	0.001
451	358	GO:0008266	0.001
452	294	GO:0006974	0.001
453	86	GO:0001011	0.001
454	432	GO:0010920	0.001
455	428	GO:0010834	0.001
456	756	GO:0034648	0.001
457	1108	GO:0051908	0.001
458	1121	GO:0055105	0
459	843	GO:0042487	0
460	526	GO:0019217	0
461	133	GO:0002495	0
462	523	GO:0019104	0
463	1293	GO:0090399	0
464	864	GO:0043125	0
465	1067	GO:0051256	0
466	855	GO:0042992	0
467	490	GO:0016572	0
468	419	GO:0010669	0
469	874	GO:0043243	0
470	259	GO:0006281	0
471	564	GO:0022037	0
472	339	GO:0007346	0
473	161	GO:0003878	0
474	26	GO:0000159	0
475	972	GO:0045945	0
476	1045	GO:0050658	0
477	208	GO:0005518	0
478	1314	GO:2000346	0
479	1109	GO:0051974	0
480	382	GO:0008853	0
481	163	GO:0003916	0
482	448	GO:0014912	0
483	91	GO:0001093	0
484	676	GO:0032142	0
485	862	GO:0043111	0
486	502	GO:0016817	0
487	608	GO:0030845	0
488	68	GO:0000796	0
489	988	GO:0046661	0
490	355	GO:0008143	0
491	658	GO:0031627	0
492	366	GO:0008347	0
493	547	GO:0021660	0
494	214	GO:0005637	0
495	1277	GO:0072659	0
496	61	GO:0000784	0
497	1097	GO:0051661	0
498	795	GO:0035491	0
499	911	GO:0044428	0
500	292	GO:0006957	0
501	1326	GO:2000639	0
502	982	GO:0046580	0
503	1013	GO:0048208	0
504	1079	GO:0051329	0
505	1337	GO:2001022	0
506	1249	GO:0071813	0
507	752	GO:0034501	0
508	1241	GO:0071559	0
509	897	GO:0043586	0
510	11	GO:0000077	0
511	109	GO:0001841	0
512	671	GO:0032095	0
513	402	GO:0010212	0
514	145	GO:0003283	0
515	1290	GO:0090307	0
516	211	GO:0005540	0
517	1004	GO:0048009	0
518	1116	GO:0055013	0
519	1037	GO:0048813	0
520	953	GO:0045769	0
521	883	GO:0043409	-0.001
522	738	GO:0033683	-0.001
523	66	GO:0000794	-0.001
524	1136	GO:0060253	-0.001
525	639	GO:0031427	-0.001
526	593	GO:0030449	-0.001
527	90	GO:0001087	-0.001
528	1095	GO:0051635	-0.001
529	530	GO:0019899	-0.001
530	666	GO:0031952	-0.001
531	691	GO:0032357	-0.001
532	936	GO:0045616	-0.001
533	321	GO:0007096	-0.001
534	1269	GO:0072284	-0.001
535	186	GO:0004712	-0.001
536	1138	GO:0060305	-0.001
537	361	GO:0008280	-0.001
538	291	GO:0006956	-0.001
539	601	GO:0030616	-0.001
540	934	GO:0045542	-0.001
541	875	GO:0043254	-0.001
542	763	GO:0034983	-0.001
543	620	GO:0031056	-0.001
544	944	GO:0045717	-0.001
545	567	GO:0022614	-0.001
546	300	GO:0007049	-0.001
547	740	GO:0034056	-0.001
548	439	GO:0014002	-0.001
549	424	GO:0010792	-0.001
550	1215	GO:0070887	-0.001
551	488	GO:0016570	-0.001
552	548	GO:0021666	-0.001
553	437	GO:0010997	-0.001
554	961	GO:0045859	-0.001
555	877	GO:0043281	-0.001
556	248	GO:0006203	-0.001
557	512	GO:0017136	-0.001
558	351	GO:0008089	-0.001
559	1161	GO:0060710	-0.001
560	1007	GO:0048096	-0.001
561	550	GO:0021702	-0.001
562	320	GO:0007095	-0.001
563	1302	GO:1900625	-0.001
564	1197	GO:0070410	-0.001
565	1212	GO:0070816	-0.001
566	505	GO:0016874	-0.001
567	771	GO:0035104	-0.001
568	1012	GO:0048168	-0.001
569	723	GO:0033262	-0.001
570	983	GO:0046600	-0.001
571	239	GO:0005881	-0.001
572	375	GO:0008601	-0.001
573	469	GO:0016075	-0.001
574	996	GO:0046929	-0.001
575	1213	GO:0070837	-0.001
576	802	GO:0035539	-0.001
577	768	GO:0035065	-0.001
578	466	GO:0015979	-0.001
579	1207	GO:0070560	-0.001
580	1248	GO:0071778	-0.001
581	24	GO:0000117	-0.001
582	957	GO:0045799	-0.001
583	1276	GO:0072563	-0.001
584	896	GO:0043570	-0.001
585	1117	GO:0055037	-0.001
586	621	GO:0031065	-0.001
587	1291	GO:0090311	-0.001
588	1246	GO:0071732	-0.001
589	139	GO:0003131	-0.001
590	985	GO:0046602	-0.001
591	1257	GO:0072044	-0.002
592	215	GO:0005639	-0.002
593	197	GO:0005080	-0.002
594	726	GO:0033504	-0.002
595	264	GO:0006301	-0.002
596	194	GO:0004955	-0.002
597	147	GO:0003334	-0.002
598	369	GO:0008413	-0.002
599	776	GO:0035189	-0.002
600	808	GO:0035748	-0.002
601	846	GO:0042552	-0.002
602	504	GO:0016851	-0.002
603	328	GO:0007129	-0.002
604	1298	GO:1900212	-0.002
605	242	GO:0005912	-0.002
606	619	GO:0031054	-0.002
607	529	GO:0019836	-0.002
608	683	GO:0032204	-0.002
609	519	GO:0019005	-0.002
610	684	GO:0032214	-0.002
611	984	GO:0046601	-0.002
612	539	GO:0021542	-0.002
613	769	GO:0035098	-0.002
614	1144	GO:0060375	-0.002
615	878	GO:0043297	-0.002
616	909	GO:0044154	-0.002
617	578	GO:0030174	-0.002
618	833	GO:0042176	-0.002
619	796	GO:0035500	-0.002
620	467	GO:0015995	-0.002
621	337	GO:0007276	-0.002
622	1165	GO:0060765	-0.002
623	724	GO:0033300	-0.002
624	94	GO:0001300	-0.002
625	200	GO:0005160	-0.002
626	261	GO:0006284	-0.002
627	1273	GO:0072365	-0.002
628	496	GO:0016589	-0.002
629	694	GO:0032407	-0.002
630	1118	GO:0055062	-0.002
631	884	GO:0043422	-0.002
632	589	GO:0030337	-0.002
633	430	GO:0010883	-0.002
634	95	GO:0001309	-0.002
635	28	GO:0000212	-0.002
636	465	GO:0015891	-0.002
637	1132	GO:0060217	-0.002
638	742	GO:0034080	-0.002
639	692	GO:0032403	-0.002
640	537	GO:0021522	-0.002
641	480	GO:0016446	-0.002
642	93	GO:0001103	-0.002
643	1135	GO:0060252	-0.002
644	614	GO:0030953	-0.002
645	1163	GO:0060748	-0.002
646	132	GO:0002430	-0.002
647	503	GO:0016818	-0.002
648	598	GO:0030512	-0.002
649	1247	GO:0071777	-0.002
650	617	GO:0031052	-0.002
651	653	GO:0031573	-0.002
652	1129	GO:0060113	-0.002
653	1336	GO:2001014	-0.002
654	410	GO:0010469	-0.002
655	1222	GO:0071107	-0.002
656	1359	hsa04330	-0.002
657	376	GO:0008608	-0.002
658	625	GO:0031104	-0.002
659	1310	GO:2000121	-0.002
660	276	GO:0006346	-0.002
661	327	GO:0007127	-0.002
662	1082	GO:0051387	-0.002
663	704	GO:0032869	-0.002
664	485	GO:0016514	-0.002
665	940	GO:0045668	-0.003
666	1210	GO:0070734	-0.003
667	629	GO:0031225	-0.003
668	2	GO:0000014	-0.003
669	599	GO:0030520	-0.003
670	71	GO:0000801	-0.003
671	198	GO:0005112	-0.003
672	720	GO:0033193	-0.003
673	21	GO:0000090	-0.003
674	491	GO:0016574	-0.003
675	1158	GO:0060693	-0.003
676	498	GO:0016605	-0.003
677	216	GO:0005652	-0.003
678	1319	GO:2000594	-0.003
679	1096	GO:0051649	-0.003
680	1036	GO:0048812	-0.003
681	1159	GO:0060694	-0.003
682	1023	GO:0048478	-0.003
683	1057	GO:0051054	-0.003
684	819	GO:0035987	-0.003
685	989	GO:0046680	-0.003
686	737	GO:0033674	-0.003
687	193	GO:0004882	-0.003
688	57	GO:0000779	-0.003
689	1098	GO:0051668	-0.003
690	937	GO:0045624	-0.003
691	680	GO:0032181	-0.003
692	1330	GO:2000737	-0.003
693	721	GO:0033205	-0.003
694	1085	GO:0051444	-0.003
695	298	GO:0007018	-0.003
696	117	GO:0001953	-0.003
697	105	GO:0001832	-0.003
698	960	GO:0045843	-0.003
699	185	GO:0004693	-0.003
700	45	GO:0000712	-0.003
701	1253	GO:0071922	-0.003
702	735	GO:0033629	-0.003
703	1090	GO:0051571	-0.003
704	468	GO:0016050	-0.003
705	1018	GO:0048332	-0.003
706	303	GO:0007052	-0.003
707	1239	GO:0071480	-0.003
708	1066	GO:0051233	-0.003
709	1338	GO:2001033	-0.003
710	154	GO:0003696	-0.003
711	122	GO:0002040	-0.003
712	156	GO:0003712	-0.003
713	314	GO:0007089	-0.003
714	700	GO:0032587	-0.003
715	247	GO:0006109	-0.003
716	624	GO:0031102	-0.003
717	1360	hsa03420	-0.003
718	272	GO:0006335	-0.003
719	821	GO:0039003	-0.003
720	172	GO:0004386	-0.003
721	346	GO:0007622	-0.003
722	230	GO:0005741	-0.003
723	41	GO:0000406	-0.003
724	1175	GO:0061045	-0.004
725	1152	GO:0060565	-0.004
726	180	GO:0004525	-0.004
727	816	GO:0035978	-0.004
728	943	GO:0045713	-0.004
729	35	GO:0000320	-0.004
730	311	GO:0007079	-0.004
731	1256	GO:0072017	-0.004
732	494	GO:0016584	-0.004
733	336	GO:0007270	-0.004
734	178	GO:0004520	-0.004
735	201	GO:0005173	-0.004
736	581	GO:0030261	-0.004
737	885	GO:0043497	-0.004
738	734	GO:0033627	-0.004
739	659	GO:0031641	-0.004
740	304	GO:0007057	-0.004
741	891	GO:0043539	-0.004
742	1278	GO:0072686	-0.004
743	479	GO:0016442	-0.004
744	1196	GO:0070403	-0.004
745	348	GO:0008022	-0.004
746	1281	GO:0090003	-0.004
747	914	GO:0045023	-0.004
748	1230	GO:0071283	-0.004
749	190	GO:0004799	-0.004
750	1149	GO:0060433	-0.004
751	275	GO:0006344	-0.004
752	751	GO:0034446	-0.004
753	1286	GO:0090166	-0.004
754	644	GO:0031507	-0.004
755	575	GO:0030100	-0.004
756	53	GO:0000775	-0.004
757	955	GO:0045792	-0.004
758	1300	GO:1900218	-0.004
759	610	GO:0030870	-0.004
760	325	GO:0007113	-0.004
761	1350	hsa04144	-0.004
762	690	GO:0032302	-0.004
763	695	GO:0032436	-0.004
764	397	GO:0009966	-0.004
765	85	GO:0001010	-0.004
766	354	GO:0008139	-0.004
767	1155	GO:0060599	-0.004
768	976	GO:0046078	-0.004
769	605	GO:0030690	-0.004
770	630	GO:0031262	-0.004
771	797	GO:0035501	-0.004
772	1201	GO:0070438	-0.004
773	352	GO:0008094	-0.004
774	517	GO:0018205	-0.004
775	1032	GO:0048730	-0.004
776	868	GO:0043142	-0.004
777	1279	GO:0080134	-0.004
778	580	GO:0030221	-0.004
779	1252	GO:0071895	-0.004
780	677	GO:0032143	-0.004
781	1168	GO:0060770	-0.004
782	234	GO:0005827	-0.004
783	844	GO:0042524	-0.004
784	80	GO:0000942	-0.004
785	803	GO:0035562	-0.004
786	634	GO:0031333	-0.004
787	1001	GO:0047485	-0.004
788	923	GO:0045171	-0.004
789	1071	GO:0051290	-0.005
790	602	GO:0030618	-0.005
791	662	GO:0031648	-0.005
792	673	GO:0032133	-0.005
793	682	GO:0032203	-0.005
794	188	GO:0004722	-0.005
795	1329	GO:2000685	-0.005
796	169	GO:0004003	-0.005
797	123	GO:0002043	-0.005
798	711	GO:0032956	-0.005
799	312	GO:0007080	-0.005
800	1254	GO:0071930	-0.005
801	1160	GO:0060706	-0.005
802	431	GO:0010906	-0.005
803	562	GO:0022011	-0.005
804	1227	GO:0071173	-0.005
805	1299	GO:1900215	-0.005
806	951	GO:0045746	-0.005
807	249	GO:0006231	-0.005
808	476	GO:0016323	-0.005
809	1073	GO:0051298	-0.005
810	221	GO:0005677	-0.005
811	54	GO:0000776	-0.005
812	696	GO:0032444	-0.005
813	1321	GO:2000612	-0.005
814	1112	GO:0051987	-0.005
815	915	GO:0045069	-0.005
816	689	GO:0032301	-0.005
817	789	GO:0035359	-0.005
818	1280	GO:0085020	-0.005
819	1251	GO:0071866	-0.005
820	899	GO:0043610	-0.005
821	876	GO:0043277	-0.005
822	1272	GO:0072332	-0.005
823	1087	GO:0051489	-0.005
824	255	GO:0006268	-0.005
825	1147	GO:0060394	-0.005
826	1052	GO:0050820	-0.005
827	918	GO:0045120	-0.005
828	1127	GO:0060068	-0.005
829	224	GO:0005697	-0.005
830	736	GO:0033673	-0.005
831	384	GO:0009157	-0.005
832	560	GO:0021978	-0.005
833	670	GO:0032091	-0.005
834	919	GO:0045128	-0.005
835	649	GO:0031529	-0.005
836	27	GO:0000183	-0.005
837	648	GO:0031528	-0.005
838	1311	GO:2000134	-0.005
839	99	GO:0001578	-0.005
840	970	GO:0045931	-0.005
841	748	GO:0034333	-0.005
842	997	GO:0046969	-0.005
843	1271	GO:0072305	-0.005
844	1156	GO:0060623	-0.005
845	181	GO:0004527	-0.005
846	574	GO:0030098	-0.005
847	167	GO:0003964	-0.005
848	521	GO:0019088	-0.005
849	1008	GO:0048102	-0.005
850	1164	GO:0060750	-0.005
851	1084	GO:0051443	-0.005
852	535	GO:0021510	-0.005
853	365	GO:0008340	-0.005
854	1235	GO:0071455	-0.005
855	241	GO:0005911	-0.005
856	75	GO:0000910	-0.005
857	269	GO:0006311	-0.006
858	600	GO:0030521	-0.006
859	1050	GO:0050767	-0.006
860	310	GO:0007076	-0.006
861	199	GO:0005158	-0.006
862	347	GO:0008013	-0.006
863	963	GO:0045870	-0.006
864	638	GO:0031398	-0.006
865	1262	GO:0072134	-0.006
866	18	GO:0000087	-0.006
867	818	GO:0035986	-0.006
868	531	GO:0019900	-0.006
869	946	GO:0045726	-0.006
870	555	GO:0021797	-0.006
871	274	GO:0006343	-0.006
872	31	GO:0000236	-0.006
873	1042	GO:0050321	-0.006
874	856	GO:0042993	-0.006
875	1105	GO:0051880	-0.006
876	51	GO:0000733	-0.006
877	615	GO:0030971	-0.006
878	160	GO:0003777	-0.006
879	128	GO:0002204	-0.006
880	835	GO:0042246	-0.006
881	159	GO:0003721	-0.006
882	493	GO:0016581	-0.006
883	990	GO:0046683	-0.006
884	1270	GO:0072300	-0.006
885	267	GO:0006309	-0.006
886	323	GO:0007100	-0.006
887	559	GO:0021897	-0.006
888	1113	GO:0051988	-0.006
889	425	GO:0010800	-0.006
890	1173	GO:0061029	-0.006
891	646	GO:0031523	-0.006
892	1058	GO:0051096	-0.006
893	443	GO:0014040	-0.006
894	1294	GO:0090402	-0.006
895	1283	GO:0090068	-0.006
896	1086	GO:0051488	-0.006
897	285	GO:0006482	-0.006
898	243	GO:0005958	-0.006
899	978	GO:0046329	-0.006
900	1021	GO:0048471	-0.006
901	10	GO:0000076	-0.006
902	974	GO:0045955	-0.006
903	1328	GO:2000655	-0.006
904	67	GO:0000795	-0.006
905	1157	GO:0060685	-0.006
906	231	GO:0005768	-0.006
907	391	GO:0009330	-0.006
908	1011	GO:0048147	-0.006
909	527	GO:0019237	-0.006
910	568	GO:0022616	-0.006
911	302	GO:0007051	-0.006
912	1137	GO:0060291	-0.006
913	1240	GO:0071535	-0.006
914	1192	GO:0070306	-0.006
915	871	GO:0043219	-0.007
916	266	GO:0006303	-0.007
917	817	GO:0035985	-0.007
918	98	GO:0001556	-0.007
919	929	GO:0045295	-0.007
920	116	GO:0001939	-0.007
921	894	GO:0043564	-0.007
922	445	GO:0014067	-0.007
923	3	GO:0000018	-0.007
924	1332	GO:2000757	-0.007
925	223	GO:0005694	-0.007
926	837	GO:0042325	-0.007
927	618	GO:0031053	-0.007
928	688	GO:0032298	-0.007
929	1106	GO:0051893	-0.007
930	520	GO:0019035	-0.007
931	84	GO:0000988	-0.007
932	815	GO:0035887	-0.007
933	222	GO:0005678	-0.007
934	942	GO:0045685	-0.007
935	305	GO:0007059	-0.007
936	474	GO:0016310	-0.007
937	120	GO:0002011	-0.007
938	1017	GO:0048318	-0.007
939	697	GO:0032508	-0.007
940	1186	GO:0070034	-0.007
941	939	GO:0045664	-0.007
942	59	GO:0000781	-0.007
943	13	GO:0000080	-0.007
944	113	GO:0001932	-0.007
945	6	GO:0000070	-0.007
946	788	GO:0035358	-0.007
947	413	GO:0010569	-0.007
948	522	GO:0019102	-0.007
949	1179	GO:0061351	-0.007
950	1315	GO:2000377	-0.007
951	121	GO:0002039	-0.007
952	343	GO:0007500	-0.007
953	489	GO:0016571	-0.007
954	1205	GO:0070531	-0.007
955	385	GO:0009186	-0.007
956	1282	GO:0090007	-0.007
957	340	GO:0007416	-0.007
958	791	GO:0035402	-0.008
959	1035	GO:0048808	-0.008
960	1093	GO:0051575	-0.008
961	52	GO:0000739	-0.008
962	482	GO:0016458	-0.008
963	561	GO:0022004	-0.008
964	49	GO:0000730	-0.008
965	750	GO:0034391	-0.008
966	1022	GO:0048477	-0.008
967	930	GO:0045444	-0.008
968	579	GO:0030219	-0.008
969	1260	GO:0072125	-0.008
970	1361	hsa04114	-0.008
971	38	GO:0000403	-0.008
972	421	GO:0010719	-0.008
973	656	GO:0031619	-0.008
974	458	GO:0015630	-0.008
975	290	GO:0006921	-0.008
976	1323	GO:2000617	-0.008
977	1327	GO:2000648	-0.008
978	1061	GO:0051106	-0.008
979	746	GO:0034244	-0.008
980	393	GO:0009411	-0.008
981	887	GO:0043515	-0.008
982	140	GO:0003160	-0.008
983	100	GO:0001673	-0.008
984	97	GO:0001547	-0.008
985	762	GO:0034979	-0.008
986	257	GO:0006271	-0.008
987	1303	GO:2000002	-0.008
988	1218	GO:0070974	-0.008
989	136	GO:0002904	-0.008
990	597	GO:0030511	-0.008
991	847	GO:0042555	-0.008
992	1313	GO:2000145	-0.008
993	495	GO:0016585	-0.008
994	1015	GO:0048255	-0.008
995	616	GO:0030983	-0.008
996	881	GO:0043398	-0.008
997	134	GO:0002520	-0.008
998	73	GO:0000806	-0.008
999	510	GO:0017108	-0.008
1000	218	GO:0005657	-0.008
1001	1309	GO:2000060	-0.008
1002	271	GO:0006333	-0.008
1003	87	GO:0001042	-0.008
1004	793	GO:0035407	-0.008
1005	1139	GO:0060318	-0.008
1006	1051	GO:0050773	-0.008
1007	541	GO:0021588	-0.008
1008	705	GO:0032873	-0.008
1009	280	GO:0006461	-0.008
1010	1031	GO:0048714	-0.008
1011	719	GO:0033186	-0.008
1012	731	GO:0033593	-0.008
1013	219	GO:0005663	-0.008
1014	1133	GO:0060218	-0.009
1015	718	GO:0033158	-0.009
1016	342	GO:0007440	-0.009
1017	865	GO:0043130	-0.009
1018	569	GO:0023014	-0.009
1019	470	GO:0016202	-0.009
1020	297	GO:0007004	-0.009
1021	149	GO:0003678	-0.009
1022	1143	GO:0060373	-0.009
1023	637	GO:0031393	-0.009
1024	628	GO:0031175	-0.009
1025	1263	GO:0072136	-0.009
1026	152	GO:0003689	-0.009
1027	715	GO:0033145	-0.009
1028	708	GO:0032886	-0.009
1029	39	GO:0000404	-0.009
1030	1200	GO:0070419	-0.009
1031	570	GO:0030010	-0.009
1032	1150	GO:0060520	-0.009
1033	350	GO:0008054	-0.009
1034	103	GO:0001783	-0.009
1035	20	GO:0000089	-0.009
1036	481	GO:0016447	-0.009
1037	992	GO:0046825	-0.009
1038	72	GO:0000805	-0.009
1039	643	GO:0031497	-0.009
1040	845	GO:0042551	-0.009
1041	685	GO:0032286	-0.009
1042	96	GO:0001542	-0.009
1043	478	GO:0016363	-0.009
1044	334	GO:0007183	-0.009
1045	411	GO:0010484	-0.009
1046	782	GO:0035284	-0.009
1047	318	GO:0007093	-0.009
1048	1088	GO:0051493	-0.009
1049	1317	GO:2000480	-0.009
1050	1184	GO:0061419	-0.009
1051	25	GO:0000132	-0.009
1052	1038	GO:0048854	-0.009
1053	1189	GO:0070215	-0.009
1054	251	GO:0006260	-0.009
1055	183	GO:0004674	-0.009
1056	171	GO:0004146	-0.009
1057	1131	GO:0060209	-0.009
1058	299	GO:0007019	-0.009
1059	669	GO:0032077	-0.009
1060	107	GO:0001835	-0.009
1061	322	GO:0007098	-0.009
1062	945	GO:0045720	-0.009
1063	1195	GO:0070373	-0.009
1064	1258	GO:0072050	-0.009
1065	64	GO:0000792	-0.009
1066	1224	GO:0071157	-0.009
1067	1289	GO:0090267	-0.009
1068	728	GO:0033553	-0.01
1069	1261	GO:0072133	-0.01
1070	641	GO:0031464	-0.01
1071	528	GO:0019724	-0.01
1072	446	GO:0014740	-0.01
1073	1146	GO:0060391	-0.01
1074	268	GO:0006310	-0.01
1075	661	GO:0031647	-0.01
1076	1307	GO:2000045	-0.01
1077	74	GO:0000819	-0.01
1078	1167	GO:0060768	-0.01
1079	367	GO:0008408	-0.01
1080	1339	GO:2001038	-0.01
1081	1204	GO:0070512	-0.01
1082	131	GO:0002328	-0.01
1083	7	GO:0000072	-0.01
1084	333	GO:0007173	-0.01
1085	509	GO:0017053	-0.01
1086	47	GO:0000723	-0.01
1087	739	GO:0033993	-0.01
1088	1063	GO:0051154	-0.01
1089	236	GO:0005871	-0.01
1090	804	GO:0035566	-0.01
1091	368	GO:0008409	-0.01
1092	144	GO:0003270	-0.01
1093	1357	hsa03450	-0.01
1094	319	GO:0007094	-0.01
1095	1285	GO:0090096	-0.01
1096	665	GO:0031937	-0.01
1097	1110	GO:0051983	-0.01
1098	1245	GO:0071681	-0.01
1099	177	GO:0004518	-0.01
1100	932	GO:0045475	-0.01
1101	674	GO:0032137	-0.01
1102	655	GO:0031616	-0.01
1103	43	GO:0000701	-0.01
1104	1153	GO:0060574	-0.01
1105	225	GO:0005719	-0.01
1106	179	GO:0004523	-0.01
1107	536	GO:0021515	-0.011
1108	650	GO:0031536	-0.011
1109	1128	GO:0060074	-0.011
1110	1151	GO:0060564	-0.011
1111	1180	GO:0061360	-0.011
1112	754	GO:0034616	-0.011
1113	106	GO:0001833	-0.011
1114	813	GO:0035855	-0.011
1115	910	GO:0044346	-0.011
1116	1324	GO:2000620	-0.011
1117	1034	GO:0048754	-0.011
1118	900	GO:0043626	-0.011
1119	895	GO:0043566	-0.011
1120	1046	GO:0050678	-0.011
1121	1107	GO:0051898	-0.011
1122	544	GO:0021631	-0.011
1123	758	GO:0034713	-0.011
1124	9	GO:0000075	-0.011
1125	447	GO:0014807	-0.011
1126	1211	GO:0070742	-0.011
1127	329	GO:0007131	-0.011
1128	678	GO:0032147	-0.011
1129	135	GO:0002821	-0.011
1130	829	GO:0042060	-0.011
1131	938	GO:0045656	-0.011
1132	50	GO:0000731	-0.011
1133	137	GO:0003014	-0.011
1134	861	GO:0043067	-0.011
1135	825	GO:0040020	-0.011
1136	1287	GO:0090200	-0.011
1137	1217	GO:0070933	-0.011
1138	1091	GO:0051573	-0.012
1139	508	GO:0017015	-0.012
1140	277	GO:0006351	-0.012
1141	1367	hsa05222	-0.012
1142	127	GO:0002193	-0.012
1143	256	GO:0006270	-0.012
1144	538	GO:0021537	-0.012
1145	947	GO:0045727	-0.012
1146	380	GO:0008634	-0.012
1147	284	GO:0006476	-0.012
1148	1320	GO:2000597	-0.012
1149	1111	GO:0051984	-0.012
1150	1124	GO:0060039	-0.012
1151	412	GO:0010485	-0.012
1152	1	GO:0000012	-0.012
1153	56	GO:0000778	-0.012
1154	712	GO:0032993	-0.012
1155	55	GO:0000777	-0.012
1156	1029	GO:0048712	-0.012
1157	1342	GO:2001220	-0.012
1158	1059	GO:0051097	-0.012
1159	1349	hsa03030	-0.012
1160	1236	GO:0071456	-0.012
1161	143	GO:0003264	-0.012
1162	408	GO:0010458	-0.012
1163	635	GO:0031334	-0.012
1164	545	GO:0021633	-0.012
1165	949	GO:0045737	-0.012
1166	331	GO:0007144	-0.012
1167	273	GO:0006338	-0.012
1168	240	GO:0005901	-0.012
1169	14	GO:0000082	-0.012
1170	1140	GO:0060326	-0.012
1171	1231	GO:0071285	-0.012
1172	1275	GO:0072428	-0.012
1173	1176	GO:0061198	-0.013
1174	142	GO:0003183	-0.013
1175	892	GO:0043542	-0.013
1176	309	GO:0007067	-0.013
1177	381	GO:0008637	-0.013
1178	104	GO:0001829	-0.013
1179	317	GO:0007092	-0.013
1180	546	GO:0021650	-0.013
1181	436	GO:0010994	-0.013
1182	426	GO:0010801	-0.013
1183	1308	GO:2000059	-0.013
1184	78	GO:0000939	-0.013
1185	956	GO:0045793	-0.013
1186	229	GO:0005737	-0.013
1187	893	GO:0043550	-0.013
1188	1304	GO:2000008	-0.013
1189	46	GO:0000722	-0.013
1190	373	GO:0008543	-0.013
1191	781	GO:0035264	-0.013
1192	32	GO:0000278	-0.013
1193	1353	hsa03440	-0.013
1194	338	GO:0007281	-0.013
1195	1020	GO:0048340	-0.013
1196	282	GO:0006469	-0.013
1197	378	GO:0008630	-0.013
1198	681	GO:0032201	-0.013
1199	1214	GO:0070848	-0.013
1200	403	GO:0010216	-0.013
1201	82	GO:0000978	-0.013
1202	335	GO:0007219	-0.013
1203	475	GO:0016314	-0.014
1204	262	GO:0006297	-0.014
1205	1365	hsa04914	-0.014
1206	518	GO:0018393	-0.014
1207	889	GO:0043518	-0.014
1208	263	GO:0006298	-0.014
1209	233	GO:0005819	-0.014
1210	1162	GO:0060740	-0.014
1211	1075	GO:0051301	-0.014
1212	979	GO:0046332	-0.014
1213	869	GO:0043148	-0.014
1214	839	GO:0042393	-0.014
1215	349	GO:0008045	-0.014
1216	1237	GO:0071459	-0.014
1217	176	GO:0004468	-0.014
1218	394	GO:0009791	-0.014
1219	472	GO:0016301	-0.014
1220	927	GO:0045190	-0.014
1221	398	GO:0010001	-0.014
1222	1040	GO:0048870	-0.014
1223	973	GO:0045950	-0.014
1224	1216	GO:0070932	-0.014
1225	904	GO:0043967	-0.015
1226	903	GO:0043923	-0.015
1227	108	GO:0001836	-0.015
1228	611	GO:0030879	-0.015
1229	733	GO:0033601	-0.015
1230	88	GO:0001047	-0.015
1231	1344	hsa03410	-0.015
1232	730	GO:0033561	-0.015
1233	533	GO:0019904	-0.015
1234	1074	GO:0051299	-0.015
1235	515	GO:0018105	-0.015
1236	118	GO:0001954	-0.015
1237	1206	GO:0070557	-0.015
1238	395	GO:0009898	-0.015
1239	226	GO:0005721	-0.015
1240	483	GO:0016477	-0.015
1241	62	GO:0000785	-0.015
1242	16	GO:0000084	-0.016
1243	37	GO:0000400	-0.016
1244	853	GO:0042826	-0.016
1245	588	GO:0030336	-0.016
1246	1048	GO:0050681	-0.016
1247	1292	GO:0090344	-0.016
1248	1024	GO:0048565	-0.016
1249	882	GO:0043407	-0.016
1250	401	GO:0010165	-0.016
1251	986	GO:0046605	-0.016
1252	1047	GO:0050680	-0.016
1253	210	GO:0005524	-0.016
1254	707	GO:0032880	-0.016
1255	657	GO:0031625	-0.016
1256	755	GO:0034644	-0.016
1257	420	GO:0010718	-0.017
1258	379	GO:0008633	-0.017
1259	1198	GO:0070411	-0.017
1260	857	GO:0043009	-0.017
1261	1130	GO:0060177	-0.017
1262	1166	GO:0060766	-0.017
1263	1356	hsa03430	-0.017
1264	34	GO:0000307	-0.017
1265	1368	hsa04350	-0.017
1266	1016	GO:0048256	-0.017
1267	158	GO:0003714	-0.017
1268	362	GO:0008283	-0.017
1269	1060	GO:0051098	-0.017
1270	850	GO:0042770	-0.018
1271	238	GO:0005876	-0.018
1272	729	GO:0033558	-0.018
1273	151	GO:0003684	-0.018
1274	834	GO:0042177	-0.018
1275	281	GO:0006468	-0.018
1276	1083	GO:0051402	-0.018
1277	698	GO:0032535	-0.018
1278	157	GO:0003713	-0.018
1279	1009	GO:0048145	-0.018
1280	1025	GO:0048589	-0.019
1281	1234	GO:0071407	-0.019
1282	713	GO:0033032	-0.019
1283	89	GO:0001085	-0.019
1284	1191	GO:0070301	-0.019
1285	838	GO:0042326	-0.019
1286	1053	GO:0050821	-0.019
1287	654	GO:0031575	-0.019
1288	516	GO:0018107	-0.019
1289	851	GO:0042771	-0.019
1290	1104	GO:0051800	-0.019
1291	212	GO:0005634	-0.019
1292	344	GO:0007507	-0.02
1293	1335	GO:2000808	-0.02
1294	586	GO:0030308	-0.02
1295	155	GO:0003697	-0.02
1296	1169	GO:0060789	-0.02
1297	289	GO:0006915	-0.02
1298	112	GO:0001889	-0.02
1299	315	GO:0007090	-0.02
1300	409	GO:0010468	-0.02
1301	341	GO:0007420	-0.02
1302	83	GO:0000987	-0.02
1303	663	GO:0031658	-0.02
1304	950	GO:0045739	-0.02
1305	497	GO:0016604	-0.021
1306	1295	GO:0097107	-0.021
1307	148	GO:0003677	-0.021
1308	642	GO:0031490	-0.021
1309	1099	GO:0051717	-0.021
1310	931	GO:0045445	-0.021
1311	1225	GO:0071158	-0.021
1312	217	GO:0005654	-0.021
1313	532	GO:0019901	-0.022
1314	1284	GO:0090071	-0.022
1315	1347	hsa05220	-0.022
1316	130	GO:0002320	-0.022
1317	565	GO:0022408	-0.022
1318	852	GO:0042802	-0.022
1319	1343	hsa04520	-0.022
1320	92	GO:0001102	-0.022
1321	873	GO:0043234	-0.022
1322	954	GO:0045786	-0.023
1323	377	GO:0008629	-0.023
1324	440	GO:0014010	-0.023
1325	114	GO:0001933	-0.023
1326	404	GO:0010332	-0.023
1327	623	GO:0031100	-0.023
1328	192	GO:0004861	-0.024
1329	1351	hsa05213	-0.024
1330	969	GO:0045930	-0.024
1331	390	GO:0009314	-0.024
1332	296	GO:0006978	-0.024
1333	1364	hsa05200	-0.024
1334	651	GO:0031571	-0.024
1335	1238	GO:0071479	-0.025
1336	965	GO:0045892	-0.025
1337	952	GO:0045768	-0.025
1338	890	GO:0043525	-0.025
1339	345	GO:0007569	-0.025
1340	1366	hsa05215	-0.025
1341	948	GO:0045736	-0.026
1342	901	GO:0043627	-0.026
1343	1352	hsa05214	-0.026
1344	1062	GO:0051146	-0.026
1345	1005	GO:0048015	-0.026
1346	1358	hsa05223	-0.026
1347	1355	hsa05218	-0.027
1348	353	GO:0008134	-0.027
1349	115	GO:0001934	-0.027
1350	1010	GO:0048146	-0.028
1351	63	GO:0000790	-0.028
1352	859	GO:0043065	-0.028
1353	830	GO:0042127	-0.028
1354	363	GO:0008285	-0.029
1355	1199	GO:0070412	-0.029
1356	301	GO:0007050	-0.03
1357	1363	hsa05212	-0.03
1358	1250	GO:0071850	-0.03
1359	1369	hsa05216	-0.03
1360	1345	hsa05219	-0.03
1361	220	GO:0005667	-0.03
1362	418	GO:0010629	-0.031
1363	1354	hsa05166	-0.031
1364	1348	hsa05210	-0.031
1365	150	GO:0003682	-0.032
1366	1362	hsa04115	-0.032
1367	101	GO:0001701	-0.033
1368	860	GO:0043066	-0.033
1369	966	GO:0045893	-0.035

## Sheet: Dateset2 MaxRel Table
Order	Feature	Name	Score
1	39	GO:0000380	0.044
2	54	GO:0000724	0.039
3	283	GO:0006302	0.036
4	170	GO:0003918	0.035
5	74	GO:0000800	0.034
6	232	GO:0005634	0.032
7	327	GO:0007064	0.031
8	345	GO:0007126	0.03
9	313	GO:0006974	0.03
10	385	GO:0008278	0.029
11	812	GO:0035173	0.029
12	269	GO:0006265	0.028
13	266	GO:0006259	0.028
14	1009	GO:0045875	0.027
15	1015	GO:0045943	0.027
16	18	GO:0000085	0.027
17	325	GO:0007062	0.027
18	1279	GO:0070683	0.026
19	274	GO:0006275	0.026
20	168	GO:0003916	0.025
21	1119	GO:0051276	0.025
22	1035	GO:0046632	0.025
23	349	GO:0007141	0.025
24	76	GO:0000805	0.025
25	77	GO:0000806	0.025
26	288	GO:0006312	0.025
27	241	GO:0005694	0.025
28	1264	GO:0070314	0.025
29	1085	GO:0048733	0.025
30	1192	GO:0060236	0.024
31	1072	GO:0048478	0.024
32	13	GO:0000079	0.024
33	387	GO:0008283	0.024
34	741	GO:0032876	0.024
35	223	GO:0005515	0.024
36	412	GO:0009048	0.024
37	1292	GO:0071107	0.024
38	69	GO:0000793	0.024
39	982	GO:0045605	0.024
40	470	GO:0014013	0.024
41	1305	GO:0071398	0.024
42	50	GO:0000712	0.023
43	1355	GO:0090166	0.023
44	300	GO:0006359	0.023
45	686	GO:0031572	0.023
46	691	GO:0031619	0.023
47	765	GO:0033593	0.023
48	676	GO:0031436	0.023
49	1387	GO:2000373	0.023
50	192	GO:0004677	0.023
51	1323	GO:0071930	0.023
52	835	GO:0035520	0.023
53	784	GO:0034088	0.023
54	1429	hsa03440	0.022
55	1271	GO:0070463	0.022
56	792	GO:0034509	0.022
57	668	GO:0031297	0.022
58	65	GO:0000781	0.022
59	656	GO:0031081	0.022
60	379	GO:0008156	0.022
61	173	GO:0004003	0.022
62	1296	GO:0071168	0.021
63	454	GO:0010767	0.021
64	1394	GO:2000615	0.021
65	443	GO:0010484	0.021
66	53	GO:0000723	0.021
67	970	GO:0045120	0.021
68	1077	GO:0048638	0.021
69	715	GO:0032298	0.021
70	335	GO:0007091	0.021
71	578	GO:0019899	0.021
72	1395	GO:2000617	0.021
73	1396	GO:2000620	0.021
74	1273	GO:0070512	0.021
75	1179	GO:0060020	0.021
76	1419	hsa04110	0.021
77	800	GO:0034722	0.021
78	596	GO:0021889	0.021
79	158	GO:0003689	0.021
80	813	GO:0035189	0.021
81	261	GO:0006044	0.021
82	1148	GO:0051726	0.021
83	1012	GO:0045910	0.021
84	937	GO:0043517	0.02
85	1030	GO:0046600	0.02
86	347	GO:0007129	0.02
87	286	GO:0006310	0.02
88	169	GO:0003917	0.02
89	815	GO:0035234	0.02
90	19	GO:0000087	0.02
91	343	GO:0007108	0.02
92	81	GO:0000915	0.02
93	913	GO:0043142	0.02
94	1204	GO:0060449	0.02
95	1122	GO:0051292	0.02
96	1008	GO:0045870	0.02
97	560	GO:0019035	0.02
98	421	GO:0009330	0.02
99	419	GO:0009294	0.02
100	649	GO:0030893	0.02
101	448	GO:0010616	0.02
102	1023	GO:0046060	0.02
103	1182	GO:0060051	0.02
104	814	GO:0035196	0.02
105	275	GO:0006281	0.02
106	669	GO:0031298	0.02
107	912	GO:0043140	0.02
108	333	GO:0007089	0.02
109	621	GO:0030263	0.02
110	49	GO:0000710	0.02
111	1003	GO:0045839	0.02
112	1332	GO:0072138	0.02
113	1185	GO:0060068	0.019
114	505	GO:0016363	0.019
115	30	GO:0000228	0.019
116	159	GO:0003691	0.019
117	295	GO:0006344	0.019
118	780	GO:0033993	0.019
119	1380	GO:2000045	0.019
120	752	GO:0033148	0.019
121	706	GO:0032142	0.019
122	721	GO:0032357	0.019
123	516	GO:0016572	0.019
124	1196	GO:0060318	0.019
125	973	GO:0045143	0.019
126	1150	GO:0051782	0.019
127	444	GO:0010485	0.019
128	1401	GO:2000773	0.019
129	753	GO:0033153	0.018
130	359	GO:0007346	0.018
131	208	GO:0005072	0.018
132	513	GO:0016538	0.018
133	45	GO:0000405	0.018
134	1007	GO:0045862	0.018
135	1322	GO:0071922	0.018
136	1190	GO:0060209	0.018
137	91	GO:0001042	0.018
138	284	GO:0006303	0.018
139	988	GO:0045682	0.018
140	783	GO:0034080	0.018
141	1004	GO:0045842	0.018
142	319	GO:0007049	0.018
143	529	GO:0016605	0.018
144	404	GO:0008630	0.018
145	1152	GO:0051880	0.018
146	705	GO:0032139	0.018
147	749	GO:0033088	0.018
148	1434	hsa03450	0.018
149	1281	GO:0070734	0.018
150	966	GO:0045023	0.017
151	324	GO:0007059	0.017
152	1127	GO:0051329	0.017
153	314	GO:0006975	0.017
154	591	GO:0021695	0.017
155	767	GO:0033596	0.017
156	1378	GO:2000036	0.017
157	1181	GO:0060044	0.017
158	1299	GO:0071283	0.017
159	1161	GO:0051987	0.017
160	1037	GO:0046680	0.017
161	1218	GO:0060623	0.017
162	1212	GO:0060564	0.017
163	16	GO:0000083	0.017
164	59	GO:0000775	0.017
165	267	GO:0006260	0.017
166	48	GO:0000701	0.017
167	951	GO:0043626	0.017
168	699	GO:0032077	0.017
169	899	GO:0043015	0.017
170	93	GO:0001047	0.017
171	73	GO:0000797	0.017
172	626	GO:0030332	0.017
173	1381	GO:2000111	0.017
174	1236	GO:0060789	0.017
175	898	GO:0043009	0.017
176	1066	GO:0048333	0.017
177	1125	GO:0051310	0.017
178	1115	GO:0051170	0.017
179	725	GO:0032405	0.017
180	277	GO:0006284	0.017
181	102	GO:0001556	0.016
182	384	GO:0008270	0.016
183	696	GO:0031648	0.016
184	929	GO:0043409	0.016
185	236	GO:0005657	0.016
186	595	GO:0021873	0.016
187	1129	GO:0051382	0.016
188	177	GO:0004090	0.016
189	921	GO:0043254	0.016
190	1223	GO:0060687	0.016
191	1109	GO:0051103	0.016
192	861	GO:0040016	0.016
193	732	GO:0032548	0.016
194	178	GO:0004137	0.016
195	1026	GO:0046092	0.016
196	745	GO:0032916	0.016
197	728	GO:0032467	0.016
198	1339	GO:0072300	0.016
199	968	GO:0045103	0.016
200	1199	GO:0060393	0.016
201	620	GO:0030261	0.016
202	532	GO:0016799	0.016
203	64	GO:0000780	0.016
204	963	GO:0044430	0.016
205	195	GO:0004712	0.016
206	1379	GO:2000042	0.016
207	282	GO:0006301	0.016
208	12	GO:0000077	0.016
209	859	GO:0040001	0.016
210	239	GO:0005663	0.016
211	251	GO:0005828	0.016
212	273	GO:0006271	0.016
213	276	GO:0006282	0.015
214	1106	GO:0051054	0.015
215	1140	GO:0051571	0.015
216	1060	GO:0048096	0.015
217	573	GO:0019724	0.015
218	258	GO:0005971	0.015
219	716	GO:0032301	0.015
220	66	GO:0000785	0.015
221	703	GO:0032137	0.015
222	707	GO:0032143	0.015
223	1402	GO:2000774	0.015
224	181	GO:0004415	0.015
225	346	GO:0007127	0.015
226	348	GO:0007131	0.015
227	900	GO:0043047	0.015
228	675	GO:0031427	0.015
229	947	GO:0043566	0.015
230	128	GO:0002204	0.015
231	287	GO:0006311	0.015
232	971	GO:0045128	0.015
233	400	GO:0008574	0.015
234	991	GO:0045726	0.015
235	1126	GO:0051322	0.015
236	7	GO:0000070	0.015
237	1110	GO:0051106	0.015
238	1316	GO:0071778	0.015
239	914	GO:0043148	0.015
240	985	GO:0045624	0.015
241	1293	GO:0071141	0.015
242	821	GO:0035312	0.015
243	974	GO:0045145	0.015
244	1157	GO:0051908	0.015
245	681	GO:0031508	0.015
246	31	GO:0000236	0.015
247	628	GO:0030337	0.015
248	92	GO:0001046	0.015
249	464	GO:0010972	0.015
250	1424	hsa03030	0.015
251	449	GO:0010625	0.015
252	965	GO:0044464	0.015
253	1144	GO:0051580	0.015
254	70	GO:0000794	0.015
255	1068	GO:0048386	0.014
256	249	GO:0005815	0.014
257	1017	GO:0045950	0.014
258	1142	GO:0051574	0.014
259	757	GO:0033261	0.014
260	714	GO:0032290	0.014
261	1301	GO:0071335	0.014
262	1082	GO:0048713	0.014
263	78	GO:0000819	0.014
264	165	GO:0003836	0.014
265	450	GO:0010626	0.014
266	950	GO:0043596	0.014
267	1175	GO:0055100	0.014
268	1145	GO:0051649	0.014
269	1391	GO:2000481	0.014
270	1274	GO:0070531	0.014
271	272	GO:0006270	0.014
272	235	GO:0005654	0.014
273	3	GO:0000018	0.014
274	1107	GO:0051096	0.014
275	179	GO:0004146	0.014
276	1130	GO:0051389	0.014
277	1201	GO:0060433	0.014
278	739	GO:0032863	0.014
279	1098	GO:0050681	0.014
280	967	GO:0045069	0.014
281	1313	GO:0071681	0.014
282	1349	GO:0085020	0.014
283	1259	GO:0070173	0.014
284	429	GO:0010070	0.014
285	1417	hsa03410	0.014
286	1368	GO:0097149	0.014
287	1158	GO:0051974	0.014
288	5	GO:0000022	0.014
289	840	GO:0035624	0.014
290	424	GO:0009432	0.014
291	47	GO:0000444	0.014
292	72	GO:0000796	0.014
293	252	GO:0005873	0.014
294	1019	GO:0045964	0.014
295	1229	GO:0060743	0.014
296	291	GO:0006335	0.014
297	1243	GO:0061038	0.014
298	594	GO:0021858	0.014
299	758	GO:0033262	0.014
300	1095	GO:0050658	0.014
301	430	GO:0010159	0.014
302	1361	GO:0090307	0.013
303	888	GO:0042634	0.013
304	1213	GO:0060565	0.013
305	323	GO:0007057	0.013
306	139	GO:0002763	0.013
307	338	GO:0007094	0.013
308	756	GO:0033205	0.013
309	268	GO:0006261	0.013
310	63	GO:0000779	0.013
311	270	GO:0006266	0.013
312	701	GO:0032116	0.013
313	811	GO:0035140	0.013
314	157	GO:0003684	0.013
315	946	GO:0043564	0.013
316	29	GO:0000216	0.013
317	4	GO:0000019	0.013
318	161	GO:0003697	0.013
319	246	GO:0005726	0.013
320	14	GO:0000080	0.013
321	877	GO:0042393	0.013
322	616	GO:0030174	0.013
323	213	GO:0005173	0.013
324	1097	GO:0050680	0.013
325	332	GO:0007088	0.013
326	931	GO:0043426	0.013
327	1141	GO:0051573	0.013
328	1315	GO:0071777	0.013
329	769	GO:0033600	0.013
330	747	GO:0032967	0.013
331	670	GO:0031301	0.013
332	1073	GO:0048565	0.013
333	44	GO:0000404	0.013
334	438	GO:0010389	0.013
335	579	GO:0019900	0.013
336	24	GO:0000117	0.013
337	374	GO:0008094	0.013
338	1214	GO:0060576	0.013
339	1038	GO:0046683	0.013
340	1014	GO:0045931	0.012
341	1123	GO:0051298	0.012
342	366	GO:0007507	0.012
343	112	GO:0001833	0.012
344	654	GO:0031065	0.012
345	418	GO:0009263	0.012
346	586	GO:0021612	0.012
347	46	GO:0000406	0.012
348	717	GO:0032302	0.012
349	200	GO:0004748	0.012
350	709	GO:0032181	0.012
351	1270	GO:0070419	0.012
352	279	GO:0006289	0.012
353	809	GO:0035098	0.012
354	140	GO:0002821	0.012
355	624	GO:0030308	0.012
356	491	GO:0015739	0.012
357	9	GO:0000073	0.012
358	1284	GO:0070816	0.012
359	483	GO:0015136	0.012
360	257	GO:0005958	0.012
361	514	GO:0016568	0.012
362	1409	GO:2001038	0.012
363	61	GO:0000777	0.012
364	298	GO:0006353	0.012
365	1113	GO:0051154	0.012
366	468	GO:0012501	0.012
367	52	GO:0000722	0.012
368	62	GO:0000778	0.012
369	280	GO:0006297	0.012
370	1330	GO:0072133	0.012
371	694	GO:0031643	0.012
372	1326	GO:0072044	0.012
373	863	GO:0040038	0.012
374	1415	GO:2001241	0.012
375	667	GO:0031262	0.012
376	465	GO:0010991	0.012
377	11	GO:0000076	0.012
378	15	GO:0000082	0.012
379	886	GO:0042555	0.012
380	237	GO:0005658	0.012
381	371	GO:0008022	0.012
382	446	GO:0010569	0.012
383	88	GO:0000987	0.012
384	639	GO:0030616	0.012
385	420	GO:0009314	0.012
386	915	GO:0043175	0.012
387	1343	GO:0072428	0.012
388	983	GO:0045616	0.012
389	1438	hsa04115	0.012
390	84	GO:0000939	0.012
391	488	GO:0015616	0.012
392	230	GO:0005595	0.012
393	779	GO:0033906	0.012
394	563	GO:0019066	0.012
395	822	GO:0035330	0.012
396	793	GO:0034616	0.012
397	1114	GO:0051168	0.012
398	759	GO:0033484	0.012
399	1084	GO:0048730	0.012
400	94	GO:0001102	0.012
401	415	GO:0009157	0.012
402	264	GO:0006231	0.012
403	202	GO:0004799	0.012
404	1024	GO:0046078	0.012
405	564	GO:0019088	0.012
406	457	GO:0010834	0.012
407	713	GO:0032263	0.012
408	262	GO:0006178	0.012
409	1025	GO:0046083	0.012
410	1166	GO:0052657	0.012
411	1022	GO:0046040	0.012
412	1027	GO:0046100	0.012
413	1021	GO:0046038	0.012
414	977	GO:0045190	0.012
415	1362	GO:0090399	0.012
416	1032	GO:0046602	0.012
417	1277	GO:0070577	0.012
418	151	GO:0003279	0.012
419	1331	GO:0072134	0.012
420	1263	GO:0070306	0.012
421	1079	GO:0048645	0.012
422	781	GO:0034056	0.012
423	1054	GO:0047485	0.012
424	751	GO:0033145	0.012
425	948	GO:0043570	0.012
426	1083	GO:0048714	0.012
427	476	GO:0014740	0.012
428	1441	hsa05200	0.012
429	555	GO:0018205	0.012
430	500	GO:0016242	0.011
431	938	GO:0043518	0.011
432	682	GO:0031523	0.011
433	321	GO:0007051	0.011
434	710	GO:0032201	0.011
435	383	GO:0008265	0.011
436	738	GO:0032859	0.011
437	545	GO:0017123	0.011
438	943	GO:0043545	0.011
439	129	GO:0002215	0.011
440	1324	GO:0071954	0.011
441	842	GO:0035709	0.011
442	841	GO:0035708	0.011
443	843	GO:0035712	0.011
444	1374	GO:1900281	0.011
445	945	GO:0043550	0.011
446	1029	GO:0046329	0.011
447	441	GO:0010468	0.011
448	364	GO:0007500	0.011
449	83	GO:0000922	0.011
450	1261	GO:0070295	0.011
451	472	GO:0014040	0.011
452	1234	GO:0060766	0.011
453	866	GO:0042063	0.011
454	1276	GO:0070557	0.011
455	1289	GO:0070969	0.011
456	2	GO:0000014	0.011
457	495	GO:0015995	0.011
458	1432	hsa03430	0.011
459	416	GO:0009186	0.011
460	494	GO:0015979	0.011
461	535	GO:0016851	0.011
462	589	GO:0021660	0.011
463	1240	GO:0061010	0.011
464	590	GO:0021666	0.011
465	630	GO:0030422	0.011
466	105	GO:0001673	0.011
467	819	GO:0035264	0.011
468	724	GO:0032403	0.011
469	1100	GO:0050773	0.011
470	370	GO:0008013	0.011
471	1444	hsa05222	0.011
472	1329	GO:0072125	0.011
473	1000	GO:0045786	0.011
474	857	GO:0038052	0.011
475	697	GO:0031798	0.011
476	1143	GO:0051575	0.011
477	1437	hsa04114	0.011
478	730	GO:0032509	0.011
479	629	GO:0030379	0.011
480	1191	GO:0060213	0.011
481	1189	GO:0060206	0.011
482	941	GO:0043539	0.011
483	602	GO:0022408	0.011
484	1307	GO:0071459	0.011
485	471	GO:0014037	0.011
486	474	GO:0014067	0.011
487	998	GO:0045769	0.011
488	1031	GO:0046601	0.011
489	1146	GO:0051661	0.011
490	67	GO:0000790	0.011
491	224	GO:0005520	0.011
492	1156	GO:0051901	0.011
493	1116	GO:0051233	0.011
494	1351	GO:0090003	0.011
495	771	GO:0033673	0.011
496	1227	GO:0060740	0.011
497	585	GO:0021569	0.011
498	687	GO:0031573	0.011
499	1050	GO:0047288	0.011
500	506	GO:0016446	0.011
501	152	GO:0003289	0.011
502	1257	GO:0070087	0.011
503	1442	hsa04914	0.011
504	434	GO:0010225	0.011
505	711	GO:0032204	0.011
506	789	GO:0034421	0.011
507	1117	GO:0051247	0.011
508	440	GO:0010465	0.011
509	1291	GO:0071065	0.011
510	22	GO:0000090	0.011
511	645	GO:0030857	0.011
512	659	GO:0031102	0.011
513	727	GO:0032436	0.011
514	80	GO:0000910	0.011
515	640	GO:0030617	0.011
516	373	GO:0008054	0.01
517	509	GO:0016480	0.01
518	10	GO:0000075	0.01
519	322	GO:0007052	0.01
520	1090	GO:0048878	0.01
521	648	GO:0030892	0.01
522	336	GO:0007092	0.01
523	43	GO:0000403	0.01
524	453	GO:0010718	0.01
525	827	GO:0035402	0.01
526	828	GO:0035407	0.01
527	565	GO:0019102	0.01
528	1290	GO:0070974	0.01
529	1209	GO:0060523	0.01
530	1208	GO:0060520	0.01
531	990	GO:0045720	0.01
532	1044	GO:0046903	0.01
533	489	GO:0015705	0.01
534	1010	GO:0045892	0.01
535	726	GO:0032407	0.01
536	633	GO:0030496	0.01
537	1059	GO:0048024	0.01
538	834	GO:0035518	0.01
539	411	GO:0009008	0.01
540	1217	GO:0060599	0.01
541	986	GO:0045662	0.01
542	160	GO:0003696	0.01
543	97	GO:0001300	0.01
544	597	GO:0021897	0.01
545	155	GO:0003678	0.01
546	108	GO:0001741	0.01
547	989	GO:0045685	0.01
548	1242	GO:0061035	0.01
549	1018	GO:0045955	0.01
550	1272	GO:0070483	0.01
551	928	GO:0043393	0.01
552	330	GO:0007079	0.01
553	623	GO:0030284	0.01
554	206	GO:0005010	0.01
555	204	GO:0004882	0.01
556	1118	GO:0051256	0.01
557	125	GO:0002102	0.01
558	1206	GO:0060503	0.01
559	1327	GO:0072097	0.01
560	1069	GO:0048392	0.01
561	1205	GO:0060502	0.01
562	1356	GO:0090194	0.01
563	1171	GO:0055020	0.01
564	1215	GO:0060592	0.01
565	1333	GO:0072161	0.01
566	1246	GO:0061149	0.01
567	191	GO:0004674	0.01
568	1336	GO:0072200	0.01
569	1405	GO:2001012	0.01
570	1335	GO:0072198	0.01
571	1334	GO:0072192	0.01
572	1248	GO:0061155	0.01
573	1321	GO:0071893	0.01
574	1328	GO:0072101	0.01
575	1247	GO:0061151	0.01
576	885	GO:0042552	0.01
577	570	GO:0019237	0.01
578	1376	GO:2000005	0.01
579	1377	GO:2000007	0.01
580	1382	GO:2000137	0.01
581	1105	GO:0051041	0.01
582	657	GO:0031098	0.01
583	1160	GO:0051984	0.01
584	171	GO:0003985	0.01
585	35	GO:0000279	0.01
586	432	GO:0010212	0.01
587	663	GO:0031134	0.01
588	1358	GO:0090230	0.01
589	1170	GO:0055013	0.01
590	1245	GO:0061146	0.01
591	1250	GO:0061302	0.01
592	1366	GO:0097021	0.01
593	428	GO:0009912	0.01
594	1350	GO:0085029	0.01
595	917	GO:0043220	0.01
596	1413	GO:2001181	0.01
597	1436	hsa03420	0.01
598	85	GO:0000940	0.01
599	995	GO:0045749	0.01
600	367	GO:0007569	0.01
601	121	GO:0002009	0.01
602	924	GO:0043296	0.01
603	1384	GO:2000145	0.01
604	519	GO:0016575	0.01
605	1075	GO:0048592	0.01
606	631	GO:0030423	0.01
607	805	GO:0035021	0.01
608	1	GO:0000012	0.01
609	423	GO:0009411	0.01
610	507	GO:0016447	0.01
611	401	GO:0008608	0.01
612	582	GO:0019985	0.01
613	1354	GO:0090096	0.01
614	959	GO:0044346	0.01
615	1414	GO:2001220	0.01
616	341	GO:0007098	0.01
617	1375	GO:1900625	0.01
618	1369	GO:0097157	0.01
619	712	GO:0032214	0.01
620	98	GO:0001309	0.01
621	580	GO:0019901	0.009
622	708	GO:0032154	0.009
623	1086	GO:0048762	0.009
624	515	GO:0016570	0.009
625	1348	GO:0080134	0.009
626	904	GO:0043085	0.009
627	413	GO:0009081	0.009
628	414	GO:0009082	0.009
629	1163	GO:0052654	0.009
630	1165	GO:0052656	0.009
631	1164	GO:0052655	0.009
632	245	GO:0005724	0.009
633	1149	GO:0051754	0.009
634	176	GO:0004084	0.009
635	216	GO:0005260	0.009
636	544	GO:0017108	0.009
637	215	GO:0005224	0.009
638	1047	GO:0046985	0.009
639	825	GO:0035359	0.009
640	791	GO:0034501	0.009
641	360	GO:0007356	0.009
642	1411	GO:2001076	0.009
643	422	GO:0009346	0.009
644	317	GO:0007018	0.009
645	1406	GO:2001014	0.009
646	655	GO:0031069	0.009
647	1058	GO:0048015	0.009
648	722	GO:0032389	0.009
649	802	GO:0034979	0.009
650	1400	GO:2000757	0.009
651	294	GO:0006343	0.009
652	824	GO:0035358	0.009
653	674	GO:0031393	0.009
654	425	GO:0009628	0.009
655	787	GO:0034391	0.009
656	1397	GO:2000655	0.009
657	1390	GO:2000480	0.009
658	1251	GO:0061351	0.009
659	679	GO:0031497	0.009
660	766	GO:0033594	0.009
661	952	GO:0043697	0.009
662	719	GO:0032354	0.009
663	86	GO:0000942	0.009
664	1260	GO:0070254	0.009
665	60	GO:0000776	0.009
666	750	GO:0033128	0.009
667	1147	GO:0051668	0.009
668	433	GO:0010216	0.009
669	1074	GO:0048589	0.009
670	878	GO:0042415	0.009
671	467	GO:0010997	0.009
672	684	GO:0031536	0.009
673	855	GO:0036071	0.009
674	796	GO:0034649	0.009
675	906	GO:0043112	0.009
676	957	GO:0044030	0.009
677	693	GO:0031627	0.009
678	396	GO:0008424	0.009
679	764	GO:0033578	0.009
680	704	GO:0032138	0.009
681	1045	GO:0046921	0.009
682	1111	GO:0051146	0.009
683	1151	GO:0051797	0.009
684	1422	hsa05210	0.009
685	386	GO:0008280	0.009
686	1216	GO:0060598	0.009
687	461	GO:0010936	0.009
688	278	GO:0006288	0.009
689	980	GO:0045502	0.009
690	1310	GO:0071480	0.009
691	949	GO:0043586	0.009
692	1443	hsa05215	0.009
693	334	GO:0007090	0.009
694	315	GO:0006978	0.009
695	568	GO:0019211	0.009
696	518	GO:0016574	0.009
697	1353	GO:0090007	0.009
698	849	GO:0035985	0.009
699	808	GO:0035064	0.009
700	1363	GO:0090402	0.009
701	850	GO:0035986	0.009
702	1269	GO:0070412	0.009
703	479	GO:0014912	0.009
704	748	GO:0032993	0.009
705	755	GO:0033186	0.009
706	723	GO:0032390	0.009
707	242	GO:0005712	0.009
708	902	GO:0043066	0.009
709	221	GO:0005496	0.009
710	540	GO:0017015	0.009
711	891	GO:0042771	0.009
712	1203	GO:0060442	0.009
713	164	GO:0003777	0.009
714	797	GO:0034676	0.009
715	1103	GO:0051018	0.009
716	37	GO:0000307	0.009
717	770	GO:0033629	0.009
718	976	GO:0045175	0.009
719	382	GO:0008262	0.009
720	34	GO:0000278	0.009
721	17	GO:0000084	0.009
722	619	GO:0030221	0.009
723	782	GO:0034063	0.009
724	599	GO:0021978	0.009
725	762	GO:0033558	0.009
726	729	GO:0032508	0.009
727	153	GO:0003334	0.009
728	895	GO:0042992	0.009
729	1311	GO:0071559	0.009
730	804	GO:0035020	0.009
731	1252	GO:0061360	0.008
732	587	GO:0021633	0.008
733	588	GO:0021650	0.008
734	660	GO:0031104	0.008
735	903	GO:0043067	0.008
736	1393	GO:2000597	0.008
737	1338	GO:0072221	0.008
738	733	GO:0032570	0.008
739	106	GO:0001701	0.008
740	167	GO:0003906	0.008
741	698	GO:0031937	0.008
742	116	GO:0001889	0.008
743	871	GO:0042176	0.008
744	271	GO:0006268	0.008
745	1253	GO:0061383	0.008
746	354	GO:0007221	0.008
747	1036	GO:0046677	0.008
748	1314	GO:0071732	0.008
749	1430	hsa05166	0.008
750	1222	GO:0060686	0.008
751	329	GO:0007076	0.008
752	58	GO:0000739	0.008
753	57	GO:0000733	0.008
754	1388	GO:2000377	0.008
755	390	GO:0008349	0.008
756	436	GO:0010333	0.008
757	1195	GO:0060266	0.008
758	233	GO:0005637	0.008
759	534	GO:0016818	0.008
760	132	GO:0002328	0.008
761	320	GO:0007050	0.008
762	394	GO:0008413	0.008
763	836	GO:0035539	0.008
764	1298	GO:0071228	0.008
765	263	GO:0006203	0.008
766	393	GO:0008409	0.008
767	207	GO:0005070	0.008
768	1155	GO:0051898	0.008
769	1420	hsa05220	0.008
770	1088	GO:0048812	0.008
771	627	GO:0030336	0.008
772	71	GO:0000795	0.008
773	702	GO:0032133	0.008
774	185	GO:0004518	0.008
775	673	GO:0031343	0.008
776	492	GO:0015755	0.008
777	908	GO:0043125	0.008
778	851	GO:0035987	0.008
779	848	GO:0035978	0.008
780	832	GO:0035501	0.008
781	831	GO:0035500	0.008
782	145	GO:0003131	0.008
783	760	GO:0033504	0.008
784	1408	GO:2001033	0.008
785	1124	GO:0051301	0.008
786	326	GO:0007063	0.008
787	651	GO:0031052	0.008
788	1398	GO:2000685	0.008
789	646	GO:0030870	0.008
790	369	GO:0007622	0.008
791	1399	GO:2000726	0.008
792	1237	GO:0060804	0.008
793	1193	GO:0060253	0.008
794	883	GO:0042524	0.008
795	978	GO:0045197	0.008
796	147	GO:0003180	0.008
797	162	GO:0003712	0.008
798	301	GO:0006461	0.008
799	1435	hsa05223	0.008
800	525	GO:0016590	0.008
801	666	GO:0031228	0.008
802	82	GO:0000921	0.008
803	458	GO:0010835	0.008
804	972	GO:0045132	0.008
805	455	GO:0010771	0.008
806	23	GO:0000110	0.008
807	611	GO:0030037	0.008
808	427	GO:0009877	0.008
809	642	GO:0030748	0.008
810	731	GO:0032542	0.008
811	115	GO:0001885	0.008
812	1108	GO:0051098	0.008
813	1001	GO:0045792	0.008
814	934	GO:0043504	0.008
815	1028	GO:0046293	0.008
816	1254	GO:0061418	0.008
817	761	GO:0033549	0.008
818	1340	GO:0072305	0.008
819	858	GO:0039003	0.008
820	1392	GO:2000594	0.008
821	210	GO:0005113	0.008
822	1373	GO:1900218	0.008
823	1372	GO:1900215	0.008
824	1371	GO:1900212	0.008
825	838	GO:0035566	0.008
826	265	GO:0006235	0.008
827	1162	GO:0051988	0.008
828	1094	GO:0050431	0.008
829	890	GO:0042770	0.008
830	1176	GO:0055105	0.008
831	138	GO:0002684	0.008
832	956	GO:0043997	0.008
833	75	GO:0000801	0.008
834	644	GO:0030850	0.008
835	742	GO:0032880	0.008
836	1278	GO:0070668	0.008
837	911	GO:0043138	0.008
838	1385	GO:2000191	0.008
839	664	GO:0031146	0.008
840	1342	GO:0072362	0.008
841	376	GO:0008134	0.008
842	111	GO:0001832	0.008
843	999	GO:0045778	0.008
844	533	GO:0016817	0.008
845	1407	GO:2001022	0.008
846	340	GO:0007096	0.008
847	203	GO:0004843	0.008
848	365	GO:0007501	0.008
849	517	GO:0016573	0.008
850	1200	GO:0060394	0.008
851	378	GO:0008147	0.008
852	865	GO:0042058	0.008
853	392	GO:0008408	0.008
854	193	GO:0004693	0.008
855	431	GO:0010165	0.008
856	463	GO:0010966	0.008
857	1383	GO:2000144	0.008
858	1241	GO:0061029	0.007
859	1102	GO:0050820	0.007
860	1337	GO:0072205	0.007
861	818	GO:0035261	0.007
862	316	GO:0007004	0.007
863	337	GO:0007093	0.007
864	55	GO:0000730	0.007
865	653	GO:0031056	0.007
866	184	GO:0004516	0.007
867	1297	GO:0071173	0.007
868	601	GO:0022037	0.007
869	547	GO:0017136	0.007
870	372	GO:0008045	0.007
871	829	GO:0035428	0.007
872	485	GO:0015149	0.007
873	331	GO:0007080	0.007
874	250	GO:0005819	0.007
875	498	GO:0016202	0.007
876	87	GO:0000978	0.007
877	593	GO:0021799	0.007
878	744	GO:0032909	0.007
879	567	GO:0019208	0.007
880	807	GO:0035051	0.007
881	916	GO:0043219	0.007
882	1235	GO:0060768	0.007
883	1238	GO:0060821	0.007
884	538	GO:0016933	0.007
885	260	GO:0006043	0.007
886	1275	GO:0070537	0.007
887	1319	GO:0071821	0.007
888	41	GO:0000386	0.007
889	352	GO:0007173	0.007
890	994	GO:0045739	0.007
891	521	GO:0016581	0.007
892	1280	GO:0070698	0.007
893	487	GO:0015327	0.007
894	1404	GO:2000779	0.007
895	1133	GO:0051488	0.007
896	8	GO:0000072	0.007
897	1287	GO:0070932	0.007
898	20	GO:0000088	0.007
899	537	GO:0016925	0.007
900	870	GO:0042162	0.007
901	238	GO:0005662	0.007
902	130	GO:0002244	0.007
903	607	GO:0030010	0.007
904	356	GO:0007276	0.007
905	214	GO:0005176	0.007
906	774	GO:0033690	0.007
907	1063	GO:0048168	0.007
908	553	GO:0018105	0.007
909	103	GO:0001558	0.007
910	1046	GO:0046983	0.007
911	1267	GO:0070410	0.007
912	1104	GO:0051019	0.007
913	1325	GO:0072017	0.007
914	1232	GO:0060750	0.007
915	222	GO:0005497	0.007
916	1128	GO:0051351	0.007
917	531	GO:0016772	0.007
918	542	GO:0017053	0.007
919	1346	GO:0072686	0.007
920	860	GO:0040009	0.007
921	720	GO:0032355	0.007
922	1136	GO:0051492	0.007
923	575	GO:0019789	0.007
924	887	GO:0042578	0.007
925	304	GO:0006470	0.007
926	558	GO:0019005	0.007
927	794	GO:0034644	0.007
928	1041	GO:0046831	0.007
929	869	GO:0042132	0.007
930	391	GO:0008398	0.007
931	680	GO:0031507	0.007
932	328	GO:0007067	0.007
933	114	GO:0001848	0.007
934	795	GO:0034648	0.007
935	466	GO:0010994	0.007
936	868	GO:0042127	0.007
937	290	GO:0006333	0.007
938	852	GO:0035990	0.007
939	183	GO:0004514	0.007
940	110	GO:0001817	0.007
941	227	GO:0005534	0.007
942	188	GO:0004525	0.007
943	615	GO:0030145	0.007
944	1071	GO:0048477	0.007
945	350	GO:0007144	0.007
946	1359	GO:0090267	0.007
947	293	GO:0006338	0.007
948	737	GO:0032794	0.007
949	123	GO:0002039	0.007
950	678	GO:0031492	0.007
951	309	GO:0006921	0.007
952	1426	hsa05213	0.007
953	803	GO:0035014	0.007
954	522	GO:0016584	0.007
955	548	GO:0017145	0.007
956	380	GO:0008207	0.007
957	218	GO:0005353	0.007
958	497	GO:0016167	0.007
959	180	GO:0004342	0.007
960	1061	GO:0048146	0.007
961	136	GO:0002520	0.007
962	926	GO:0043372	0.007
963	1317	GO:0071779	0.007
964	1403	GO:2000777	0.007
965	1178	GO:0055108	0.007
966	958	GO:0044091	0.007
967	892	GO:0042802	0.006
968	636	GO:0030520	0.006
969	979	GO:0045445	0.006
970	1080	GO:0048678	0.006
971	1231	GO:0060748	0.006
972	905	GO:0043089	0.006
973	460	GO:0010906	0.006
974	408	GO:0008853	0.006
975	99	GO:0001517	0.006
976	609	GO:0030030	0.006
977	473	GO:0014044	0.006
978	856	GO:0038028	0.006
979	1188	GO:0060123	0.006
980	302	GO:0006468	0.006
981	881	GO:0042487	0.006
982	28	GO:0000212	0.006
983	255	GO:0005902	0.006
984	89	GO:0000988	0.006
985	197	GO:0004721	0.006
986	546	GO:0017124	0.006
987	163	GO:0003714	0.006
988	566	GO:0019104	0.006
989	452	GO:0010629	0.006
990	406	GO:0008634	0.006
991	876	GO:0042326	0.006
992	844	GO:0035748	0.006
993	736	GO:0032680	0.006
994	1262	GO:0070301	0.006
995	884	GO:0042551	0.006
996	1300	GO:0071285	0.006
997	1225	GO:0060710	0.006
998	118	GO:0001939	0.006
999	583	GO:0021515	0.006
1000	1255	GO:0061419	0.006
1001	149	GO:0003264	0.006
1002	339	GO:0007095	0.006
1003	146	GO:0003160	0.006
1004	478	GO:0014807	0.006
1005	363	GO:0007440	0.006
1006	150	GO:0003270	0.006
1007	786	GO:0034244	0.006
1008	882	GO:0042493	0.006
1009	910	GO:0043137	0.006
1010	1065	GO:0048256	0.006
1011	190	GO:0004672	0.006
1012	56	GO:0000731	0.006
1013	1174	GO:0055096	0.006
1014	439	GO:0010458	0.006
1015	853	GO:0036002	0.006
1016	763	GO:0033561	0.006
1017	1042	GO:0046847	0.006
1018	402	GO:0008623	0.006
1019	647	GO:0030879	0.006
1020	1418	hsa05219	0.006
1021	1089	GO:0048870	0.006
1022	690	GO:0031616	0.006
1023	1184	GO:0060065	0.006
1024	503	GO:0016301	0.006
1025	1226	GO:0060738	0.006
1026	1139	GO:0051534	0.006
1027	1309	GO:0071479	0.006
1028	1020	GO:0045995	0.006
1029	880	GO:0042471	0.006
1030	975	GO:0045171	0.006
1031	445	GO:0010506	0.006
1032	740	GO:0032873	0.006
1033	893	GO:0042826	0.006
1034	1268	GO:0070411	0.006
1035	718	GO:0032321	0.006
1036	955	GO:0043967	0.006
1037	526	GO:0016592	0.006
1038	211	GO:0005114	0.006
1039	141	GO:0002904	0.006
1040	935	GO:0043515	0.006
1041	634	GO:0030500	0.006
1042	754	GO:0033158	0.006
1043	143	GO:0003014	0.006
1044	1256	GO:0070022	0.006
1045	247	GO:0005737	0.006
1046	677	GO:0031441	0.006
1047	1016	GO:0045945	0.006
1048	119	GO:0001940	0.006
1049	209	GO:0005080	0.006
1050	1220	GO:0060684	0.006
1051	961	GO:0044419	0.006
1052	1306	GO:0071455	0.006
1053	156	GO:0003682	0.006
1054	768	GO:0033598	0.006
1055	925	GO:0043297	0.006
1056	307	GO:0006612	0.006
1057	1039	GO:0046686	0.006
1058	612	GO:0030056	0.006
1059	32	GO:0000237	0.006
1060	936	GO:0043516	0.006
1061	638	GO:0030530	0.006
1062	342	GO:0007100	0.006
1063	1440	hsa05130	0.006
1064	772	GO:0033674	0.005
1065	643	GO:0030838	0.005
1066	1439	hsa05212	0.005
1067	318	GO:0007019	0.005
1068	700	GO:0032091	0.005
1069	1202	GO:0060440	0.005
1070	606	GO:0023014	0.005
1071	96	GO:0001106	0.005
1072	637	GO:0030521	0.005
1073	1034	GO:0046627	0.005
1074	561	GO:0019047	0.005
1075	90	GO:0001012	0.005
1076	113	GO:0001841	0.005
1077	933	GO:0043491	0.005
1078	600	GO:0022011	0.005
1079	1006	GO:0045859	0.005
1080	864	GO:0042054	0.005
1081	508	GO:0016477	0.005
1082	297	GO:0006351	0.005
1083	166	GO:0003858	0.005
1084	661	GO:0031110	0.005
1085	198	GO:0004725	0.005
1086	358	GO:0007283	0.005
1087	437	GO:0010369	0.005
1088	68	GO:0000792	0.005
1089	144	GO:0003130	0.005
1090	299	GO:0006357	0.005
1091	524	GO:0016589	0.005
1092	243	GO:0005719	0.005
1093	773	GO:0033688	0.005
1094	1120	GO:0051280	0.005
1095	205	GO:0005006	0.005
1096	26	GO:0000183	0.005
1097	51	GO:0000720	0.005
1098	1221	GO:0060685	0.005
1099	234	GO:0005652	0.005
1100	226	GO:0005524	0.005
1101	1302	GO:0071353	0.005
1102	1445	hsa05216	0.005
1103	962	GO:0044428	0.005
1104	996	GO:0045765	0.005
1105	504	GO:0016310	0.005
1106	36	GO:0000302	0.005
1107	683	GO:0031527	0.005
1108	1132	GO:0051444	0.005
1109	551	GO:0018024	0.005
1110	148	GO:0003183	0.005
1111	362	GO:0007422	0.005
1112	622	GO:0030277	0.005
1113	462	GO:0010944	0.005
1114	101	GO:0001547	0.005
1115	1219	GO:0060662	0.005
1116	692	GO:0031625	0.005
1117	940	GO:0043535	0.005
1118	1131	GO:0051443	0.005
1119	109	GO:0001783	0.005
1120	456	GO:0010792	0.005
1121	220	GO:0005488	0.005
1122	131	GO:0002320	0.005
1123	1121	GO:0051290	0.005
1124	357	GO:0007281	0.005
1125	909	GO:0043130	0.005
1126	1312	GO:0071564	0.005
1127	344	GO:0007113	0.005
1128	847	GO:0035887	0.005
1129	562	GO:0019049	0.005
1130	256	GO:0005938	0.005
1131	875	GO:0042325	0.005
1132	1134	GO:0051489	0.005
1133	872	GO:0042177	0.005
1134	405	GO:0008633	0.005
1135	1057	GO:0048009	0.005
1136	1033	GO:0046620	0.005
1137	122	GO:0002011	0.005
1138	837	GO:0035562	0.005
1139	981	GO:0045604	0.004
1140	1258	GO:0070123	0.004
1141	798	GO:0034699	0.004
1142	154	GO:0003677	0.004
1143	1233	GO:0060765	0.004
1144	1159	GO:0051983	0.004
1145	281	GO:0006298	0.004
1146	969	GO:0045109	0.004
1147	688	GO:0031575	0.004
1148	635	GO:0030511	0.004
1149	196	GO:0004713	0.004
1150	1137	GO:0051493	0.004
1151	435	GO:0010332	0.004
1152	308	GO:0006915	0.004
1153	120	GO:0001953	0.004
1154	1428	hsa05214	0.004
1155	1265	GO:0070372	0.004
1156	355	GO:0007258	0.004
1157	662	GO:0031116	0.004
1158	353	GO:0007183	0.004
1159	536	GO:0016874	0.004
1160	1173	GO:0055062	0.004
1161	539	GO:0016934	0.004
1162	604	GO:0022824	0.004
1163	361	GO:0007403	0.004
1164	186	GO:0004520	0.004
1165	482	GO:0015129	0.004
1166	217	GO:0005310	0.004
1167	484	GO:0015140	0.004
1168	1168	GO:0052740	0.004
1169	846	GO:0035873	0.004
1170	481	GO:0015117	0.004
1171	1167	GO:0052739	0.004
1172	490	GO:0015727	0.004
1173	306	GO:0006513	0.004
1174	1005	GO:0045843	0.004
1175	954	GO:0043932	0.004
1176	618	GO:0030214	0.004
1177	1183	GO:0060056	0.004
1178	1198	GO:0060391	0.004
1179	613	GO:0030098	0.004
1180	695	GO:0031647	0.004
1181	671	GO:0031333	0.004
1182	1112	GO:0051150	0.004
1183	1040	GO:0046777	0.004
1184	581	GO:0019904	0.004
1185	592	GO:0021702	0.004
1186	614	GO:0030100	0.004
1187	447	GO:0010592	0.004
1188	919	GO:0043240	0.004
1189	1239	GO:0060968	0.004
1190	1087	GO:0048808	0.004
1191	1433	hsa00760	0.004
1192	305	GO:0006476	0.004
1193	1180	GO:0060039	0.004
1194	25	GO:0000122	0.004
1195	104	GO:0001669	0.004
1196	1096	GO:0050678	0.004
1197	403	GO:0008629	0.004
1198	993	GO:0045736	0.004
1199	652	GO:0031053	0.004
1200	1431	hsa05218	0.004
1201	296	GO:0006346	0.004
1202	605	GO:0022891	0.004
1203	1228	GO:0060742	0.004
1204	1002	GO:0045793	0.004
1205	1285	GO:0070848	0.004
1206	1210	GO:0060528	0.004
1207	1013	GO:0045930	0.004
1208	194	GO:0004705	0.004
1209	1352	GO:0090004	0.004
1210	997	GO:0045768	0.004
1211	388	GO:0008285	0.004
1212	254	GO:0005901	0.004
1213	1416	hsa04520	0.004
1214	552	GO:0018026	0.003
1215	1295	GO:0071158	0.003
1216	312	GO:0006958	0.003
1217	231	GO:0005602	0.003
1218	1288	GO:0070933	0.003
1219	603	GO:0022614	0.003
1220	932	GO:0043484	0.003
1221	523	GO:0016585	0.003
1222	806	GO:0035033	0.003
1223	650	GO:0030971	0.003
1224	1249	GO:0061198	0.003
1225	1244	GO:0061045	0.003
1226	117	GO:0001933	0.003
1227	987	GO:0045663	0.003
1228	746	GO:0032956	0.003
1229	528	GO:0016604	0.003
1230	285	GO:0006309	0.003
1231	1070	GO:0048471	0.003
1232	823	GO:0035335	0.003
1233	918	GO:0043234	0.003
1234	1076	GO:0048598	0.003
1235	1011	GO:0045893	0.003
1236	788	GO:0034405	0.003
1237	543	GO:0017091	0.003
1238	810	GO:0035117	0.003
1239	939	GO:0043525	0.003
1240	1062	GO:0048147	0.003
1241	1135	GO:0051491	0.003
1242	1412	GO:2001141	0.003
1243	303	GO:0006469	0.003
1244	1207	GO:0060512	0.003
1245	389	GO:0008347	0.003
1246	1154	GO:0051893	0.003
1247	253	GO:0005876	0.003
1248	240	GO:0005677	0.003
1249	1425	hsa04144	0.003
1250	1427	hsa04012	0.003
1251	289	GO:0006325	0.003
1252	442	GO:0010469	0.003
1253	1421	hsa04710	0.003
1254	541	GO:0017017	0.003
1255	942	GO:0043542	0.003
1256	1081	GO:0048712	0.003
1257	1282	GO:0070742	0.003
1258	889	GO:0042692	0.003
1259	1294	GO:0071157	0.003
1260	641	GO:0030618	0.003
1261	826	GO:0035371	0.003
1262	426	GO:0009650	0.003
1263	608	GO:0030027	0.003
1264	496	GO:0016050	0.003
1265	469	GO:0014002	0.003
1266	40	GO:0000381	0.002
1267	901	GO:0043065	0.002
1268	377	GO:0008138	0.002
1269	244	GO:0005721	0.002
1270	124	GO:0002062	0.002
1271	399	GO:0008543	0.002
1272	1230	GO:0060744	0.002
1273	1138	GO:0051496	0.002
1274	617	GO:0030175	0.002
1275	27	GO:0000188	0.002
1276	1064	GO:0048208	0.002
1277	351	GO:0007162	0.002
1278	225	GO:0005522	0.002
1279	923	GO:0043281	0.002
1280	310	GO:0006956	0.002
1281	1172	GO:0055056	0.002
1282	790	GO:0034446	0.002
1283	1224	GO:0060693	0.002
1284	992	GO:0045727	0.002
1285	511	GO:0016504	0.002
1286	984	GO:0045618	0.002
1287	658	GO:0031100	0.002
1288	248	GO:0005768	0.002
1289	219	GO:0005355	0.002
1290	577	GO:0019835	0.002
1291	512	GO:0016514	0.002
1292	199	GO:0004726	0.002
1293	95	GO:0001103	0.002
1294	554	GO:0018107	0.002
1295	801	GO:0034968	0.002
1296	1078	GO:0048642	0.002
1297	1304	GO:0071391	0.002
1298	799	GO:0034713	0.002
1299	292	GO:0006337	0.002
1300	530	GO:0016607	0.002
1301	1303	GO:0071363	0.002
1302	107	GO:0001726	0.002
1303	398	GO:0008467	0.002
1304	576	GO:0019799	0.002
1305	187	GO:0004523	0.002
1306	42	GO:0000400	0.002
1307	100	GO:0001542	0.002
1308	1043	GO:0046889	0.002
1309	228	GO:0005540	0.001
1310	1266	GO:0070403	0.001
1311	873	GO:0042246	0.001
1312	1067	GO:0048340	0.001
1313	610	GO:0030032	0.001
1314	598	GO:0021956	0.001
1315	1364	GO:0090409	0.001
1316	1370	GO:1900102	0.001
1317	1153	GO:0051882	0.001
1318	1360	GO:0090290	0.001
1319	584	GO:0021528	0.001
1320	1052	GO:0047389	0.001
1321	816	GO:0035251	0.001
1322	820	GO:0035299	0.001
1323	1367	GO:0097037	0.001
1324	1365	GO:0090410	0.001
1325	1051	GO:0047290	0.001
1326	1049	GO:0047220	0.001
1327	1091	GO:0050201	0.001
1328	672	GO:0031338	0.001
1329	735	GO:0032618	0.001
1330	734	GO:0032581	0.001
1331	665	GO:0031209	0.001
1332	375	GO:0008118	0.001
1333	381	GO:0008251	0.001
1334	1410	GO:2001045	0.001
1335	1092	GO:0050333	0.001
1336	1093	GO:0050353	0.001
1337	689	GO:0031591	0.001
1338	6	GO:0000026	0.001
1339	33	GO:0000240	0.001
1340	1053	GO:0047394	0.001
1341	38	GO:0000379	0.001
1342	778	GO:0033897	0.001
1343	776	GO:0033842	0.001
1344	1055	GO:0047730	0.001
1345	1389	GO:2000406	0.001
1346	79	GO:0000831	0.001
1347	1056	GO:0047874	0.001
1348	1386	GO:2000209	0.001
1349	395	GO:0008418	0.001
1350	775	GO:0033735	0.001
1351	397	GO:0008427	0.001
1352	839	GO:0035594	0.001
1353	625	GO:0030309	0.001
1354	1357	GO:0090207	0.001
1355	1101	GO:0050785	0.001
1356	1186	GO:0060091	0.001
1357	1308	GO:0071466	0.001
1358	201	GO:0004765	0.001
1359	897	GO:0042998	0.001
1360	833	GO:0035509	0.001
1361	894	GO:0042984	0.001
1362	549	GO:0017188	0.001
1363	451	GO:0010627	0.001
1364	172	GO:0003996	0.001
1365	510	GO:0016503	0.001
1366	550	GO:0018009	0.001
1367	879	GO:0042424	0.001
1368	953	GO:0043843	0.001
1369	417	GO:0009239	0.001
1370	1187	GO:0060118	0.001
1371	1177	GO:0055107	0.001
1372	944	GO:0043549	0.001
1373	459	GO:0010869	0.001
1374	182	GO:0004483	0.001
1375	475	GO:0014739	0.001
1376	927	GO:0043378	0.001
1377	1211	GO:0060537	0.001
1378	922	GO:0043269	0.001
1379	229	GO:0005550	0.001
1380	1318	GO:0071800	0.001
1381	174	GO:0004037	0.001
1382	1283	GO:0070773	0.001
1383	1197	GO:0060339	0.001
1384	1286	GO:0070869	0.001
1385	1194	GO:0060262	0.001
1386	175	GO:0004057	0.001
1387	874	GO:0042318	0.001
1388	527	GO:0016598	0.001
1389	1344	GO:0072600	0.001
1390	1345	GO:0072674	0.001
1391	845	GO:0035786	0.001
1392	569	GO:0019236	0.001
1393	571	GO:0019290	0.001
1394	1341	GO:0072331	0.001
1395	499	GO:0016229	0.001
1396	407	GO:0008667	0.001
1397	501	GO:0016250	0.001
1398	572	GO:0019605	0.001
1399	1347	GO:0080009	0.001
1400	126	GO:0002121	0.001
1401	574	GO:0019780	0.001
1402	1048	GO:0047196	0.001
1403	1169	GO:0052746	0.001
1404	830	GO:0035499	0.001
1405	410	GO:0009000	0.001
1406	557	GO:0018874	0.001
1407	142	GO:0002932	0.001
1408	1320	GO:0071862	0.001
1409	477	GO:0014801	0.001
1410	867	GO:0042073	0.001
1411	480	GO:0015019	0.001
1412	556	GO:0018455	0.001
1413	502	GO:0016269	0.001
1414	559	GO:0019028	0.001
1415	854	GO:0036031	0.001
1416	409	GO:0008903	0.001
1417	960	GO:0044356	0.001
1418	964	GO:0044433	0.001
1419	189	GO:0004640	0.001
1420	520	GO:0016580	0.001
1421	368	GO:0007618	0.001
1422	493	GO:0015917	0.001
1423	137	GO:0002591	0.001
1424	134	GO:0002485	0.001
1425	133	GO:0002481	0.001
1426	135	GO:0002489	0.001
1427	21	GO:0000089	0.001
1428	1099	GO:0050694	0.001
1429	486	GO:0015247	0.001
1430	127	GO:0002177	0.001
1431	817	GO:0035252	0.001
1432	777	GO:0033872	0.001
1433	259	GO:0005996	0.001
1434	785	GO:0034224	0.001
1435	743	GO:0032886	0.001
1436	907	GO:0043124	0.001
1437	632	GO:0030449	0.001
1438	920	GO:0043243	0.001
1439	862	GO:0040020	0.001
1440	685	GO:0031571	0.001
1441	930	GO:0043425	0.001
1442	896	GO:0042993	0.001
1443	212	GO:0005158	0.001
1444	1423	hsa04610	0

## Sheet: Dateset2 mRMR Table
Order	Feature	Name	Score
1	39	GO:0000380	0.044
2	54	GO:0000724	0.023
3	448	GO:0010616	0.019
4	1387	GO:2000373	0.017
5	1015	GO:0045943	0.018
6	177	GO:0004090	0.015
7	385	GO:0008278	0.014
8	1035	GO:0046632	0.015
9	384	GO:0008270	0.013
10	812	GO:0035173	0.013
11	988	GO:0045682	0.012
12	261	GO:0006044	0.012
13	327	GO:0007064	0.013
14	1332	GO:0072138	0.011
15	170	GO:0003918	0.012
16	594	GO:0021858	0.01
17	230	GO:0005595	0.009
18	800	GO:0034722	0.01
19	464	GO:0010972	0.01
20	900	GO:0043047	0.009
21	165	GO:0003836	0.009
22	192	GO:0004677	0.01
23	1355	GO:0090166	0.01
24	298	GO:0006353	0.009
25	1126	GO:0051322	0.009
26	1115	GO:0051170	0.009
27	283	GO:0006302	0.01
28	181	GO:0004415	0.009
29	767	GO:0033596	0.009
30	732	GO:0032548	0.009
31	1023	GO:0046060	0.009
32	968	GO:0045103	0.009
33	491	GO:0015739	0.009
34	1085	GO:0048733	0.009
35	1192	GO:0060236	0.009
36	74	GO:0000800	0.009
37	779	GO:0033906	0.008
38	738	GO:0032859	0.008
39	49	GO:0000710	0.008
40	730	GO:0032509	0.008
41	1077	GO:0048638	0.008
42	656	GO:0031081	0.008
43	670	GO:0031301	0.008
44	349	GO:0007141	0.008
45	1182	GO:0060051	0.008
46	509	GO:0016480	0.008
47	815	GO:0035234	0.008
48	489	GO:0015705	0.008
49	982	GO:0045605	0.008
50	383	GO:0008265	0.008
51	347	GO:0007129	0.008
52	1181	GO:0060044	0.008
53	835	GO:0035520	0.008
54	1305	GO:0071398	0.008
55	1044	GO:0046903	0.008
56	899	GO:0043015	0.008
57	563	GO:0019066	0.008
58	1019	GO:0045964	0.007
59	545	GO:0017123	0.007
60	1009	GO:0045875	0.007
61	483	GO:0015136	0.007
62	427	GO:0009877	0.007
63	596	GO:0021889	0.007
64	269	GO:0006265	0.007
65	488	GO:0015616	0.007
66	943	GO:0043545	0.007
67	648	GO:0030892	0.007
68	300	GO:0006359	0.007
69	1090	GO:0048878	0.007
70	178	GO:0004137	0.007
71	76	GO:0000805	0.007
72	1003	GO:0045839	0.007
73	741	GO:0032876	0.007
74	1260	GO:0070254	0.007
75	9	GO:0000073	0.007
76	436	GO:0010333	0.006
77	1196	GO:0060318	0.007
78	1284	GO:0070816	0.006
79	888	GO:0042634	0.006
80	159	GO:0003691	0.006
81	1050	GO:0047288	0.006
82	586	GO:0021612	0.006
83	345	GO:0007126	0.007
84	245	GO:0005724	0.006
85	728	GO:0032467	0.006
86	915	GO:0043175	0.006
87	1271	GO:0070463	0.006
88	1378	GO:2000036	0.006
89	1191	GO:0060213	0.006
90	937	GO:0043517	0.006
91	629	GO:0030379	0.006
92	413	GO:0009081	0.006
93	390	GO:0008349	0.006
94	169	GO:0003917	0.006
95	260	GO:0006043	0.006
96	1179	GO:0060020	0.006
97	288	GO:0006312	0.006
98	1122	GO:0051292	0.006
99	125	GO:0002102	0.006
100	642	GO:0030748	0.006
101	274	GO:0006275	0.006
102	1007	GO:0045862	0.006
103	538	GO:0016933	0.006
104	1026	GO:0046092	0.006
105	470	GO:0014013	0.006
106	731	GO:0032542	0.006
107	1195	GO:0060266	0.006
108	701	GO:0032116	0.006
109	1204	GO:0060449	0.006
110	65	GO:0000781	0.006
111	1105	GO:0051041	0.005
112	1149	GO:0051754	0.005
113	513	GO:0016538	0.005
114	1409	GO:2001038	0.006
115	419	GO:0009294	0.006
116	1127	GO:0051329	0.005
117	1413	GO:2001181	0.005
118	422	GO:0009346	0.005
119	1156	GO:0051901	0.005
120	251	GO:0005828	0.005
121	855	GO:0036071	0.005
122	1114	GO:0051168	0.005
123	691	GO:0031619	0.005
124	796	GO:0034649	0.005
125	1158	GO:0051974	0.005
126	789	GO:0034421	0.005
127	41	GO:0000386	0.005
128	121	GO:0002009	0.005
129	414	GO:0009082	0.005
130	313	GO:0006974	0.005
131	1250	GO:0061302	0.005
132	985	GO:0045624	0.005
133	811	GO:0035140	0.005
134	1369	GO:0097157	0.005
135	258	GO:0005971	0.005
136	1261	GO:0070295	0.005
137	325	GO:0007062	0.005
138	1402	GO:2000774	0.005
139	168	GO:0003916	0.005
140	465	GO:0010991	0.005
141	516	GO:0016572	0.005
142	1106	GO:0051054	0.005
143	869	GO:0042132	0.005
144	759	GO:0033484	0.005
145	753	GO:0033153	0.005
146	1163	GO:0052654	0.005
147	241	GO:0005694	0.005
148	455	GO:0010771	0.005
149	963	GO:0044430	0.005
150	957	GO:0044030	0.005
151	266	GO:0006259	0.005
152	885	GO:0042552	0.005
153	752	GO:0033148	0.005
154	391	GO:0008398	0.005
155	669	GO:0031298	0.005
156	184	GO:0004516	0.005
157	1028	GO:0046293	0.005
158	1264	GO:0070314	0.005
159	471	GO:0014037	0.004
160	829	GO:0035428	0.004
161	792	GO:0034509	0.004
162	216	GO:0005260	0.004
163	1189	GO:0060206	0.004
164	379	GO:0008156	0.004
165	611	GO:0030037	0.004
166	343	GO:0007108	0.004
167	1165	GO:0052656	0.004
168	449	GO:0010625	0.004
169	45	GO:0000405	0.004
170	983	GO:0045616	0.004
171	749	GO:0033088	0.004
172	1238	GO:0060821	0.004
173	1178	GO:0055108	0.004
174	47	GO:0000444	0.004
175	706	GO:0032142	0.004
176	1240	GO:0061010	0.004
177	906	GO:0043112	0.004
178	814	GO:0035196	0.004
179	719	GO:0032354	0.004
180	797	GO:0034676	0.004
181	1279	GO:0070683	0.004
182	1164	GO:0052655	0.004
183	784	GO:0034088	0.004
184	972	GO:0045132	0.004
185	713	GO:0032263	0.004
186	913	GO:0043142	0.004
187	440	GO:0010465	0.004
188	77	GO:0000806	0.004
189	649	GO:0030893	0.004
190	1254	GO:0061418	0.004
191	380	GO:0008207	0.004
192	991	GO:0045726	0.004
193	666	GO:0031228	0.004
194	834	GO:0035518	0.004
195	81	GO:0000915	0.004
196	500	GO:0016242	0.004
197	1291	GO:0071065	0.004
198	176	GO:0004084	0.004
199	430	GO:0010159	0.004
200	958	GO:0044091	0.004
201	668	GO:0031297	0.004
202	525	GO:0016590	0.004
203	1298	GO:0071228	0.004
204	966	GO:0045023	0.004
205	158	GO:0003689	0.004
206	497	GO:0016167	0.004
207	765	GO:0033593	0.004
208	400	GO:0008574	0.004
209	180	GO:0004342	0.004
210	276	GO:0006282	0.004
211	1243	GO:0061038	0.004
212	468	GO:0012501	0.004
213	129	GO:0002215	0.004
214	207	GO:0005070	0.004
215	195	GO:0004712	0.004
216	1319	GO:0071821	0.004
217	659	GO:0031102	0.004
218	396	GO:0008424	0.004
219	18	GO:0000085	0.004
220	1059	GO:0048024	0.004
221	589	GO:0021660	0.003
222	203	GO:0004843	0.003
223	218	GO:0005353	0.003
224	1292	GO:0071107	0.003
225	153	GO:0003334	0.003
226	217	GO:0005310	0.003
227	657	GO:0031098	0.003
228	232	GO:0005634	0.003
229	887	GO:0042578	0.003
230	138	GO:0002684	0.003
231	458	GO:0010835	0.003
232	721	GO:0032357	0.003
233	24	GO:0000117	0.003
234	487	GO:0015327	0.003
235	1379	GO:2000042	0.003
236	1175	GO:0055100	0.003
237	32	GO:0000237	0.003
238	457	GO:0010834	0.003
239	412	GO:0009048	0.003
240	1041	GO:0046831	0.003
241	484	GO:0015140	0.003
242	764	GO:0033578	0.003
243	761	GO:0033549	0.003
244	1109	GO:0051103	0.003
245	1190	GO:0060209	0.003
246	673	GO:0031343	0.003
247	1324	GO:0071954	0.003
248	262	GO:0006178	0.003
249	970	GO:0045120	0.003
250	485	GO:0015149	0.003
251	739	GO:0032863	0.003
252	481	GO:0015117	0.003
253	50	GO:0000712	0.003
254	931	GO:0043426	0.003
255	222	GO:0005497	0.003
256	1339	GO:0072300	0.003
257	215	GO:0005224	0.003
258	1095	GO:0050658	0.003
259	973	GO:0045143	0.003
260	166	GO:0003858	0.003
261	965	GO:0044464	0.003
262	99	GO:0001517	0.003
263	1045	GO:0046921	0.003
264	19	GO:0000087	0.003
265	295	GO:0006344	0.003
266	114	GO:0001848	0.003
267	23	GO:0000110	0.003
268	590	GO:0021666	0.003
269	1142	GO:0051574	0.003
270	249	GO:0005815	0.003
271	82	GO:0000921	0.003
272	1168	GO:0052740	0.002
273	1066	GO:0048333	0.003
274	1429	hsa03440	0.003
275	1316	GO:0071778	0.002
276	878	GO:0042415	0.002
277	463	GO:0010966	0.002
278	307	GO:0006612	0.002
279	1406	GO:2001014	0.002
280	1216	GO:0060598	0.002
281	1129	GO:0051382	0.002
282	479	GO:0014912	0.002
283	842	GO:0035709	0.002
284	1433	hsa00760	0.002
285	532	GO:0016799	0.002
286	1117	GO:0051247	0.002
287	1167	GO:0052739	0.002
288	686	GO:0031572	0.002
289	1185	GO:0060068	0.002
290	492	GO:0015755	0.002
291	539	GO:0016934	0.002
292	675	GO:0031427	0.002
293	704	GO:0032138	0.002
294	1025	GO:0046083	0.002
295	1200	GO:0060394	0.002
296	591	GO:0021695	0.002
297	1434	hsa03450	0.002
298	1042	GO:0046847	0.002
299	664	GO:0031146	0.002
300	736	GO:0032680	0.002
301	950	GO:0043596	0.002
302	1130	GO:0051389	0.002
303	621	GO:0030263	0.002
304	995	GO:0045749	0.002
305	1351	GO:0090003	0.002
306	870	GO:0042162	0.002
307	1144	GO:0051580	0.002
308	1275	GO:0070537	0.002
309	718	GO:0032321	0.002
310	291	GO:0006335	0.002
311	604	GO:0022824	0.002
312	912	GO:0043140	0.002
313	1280	GO:0070698	0.002
314	1110	GO:0051106	0.002
315	1103	GO:0051018	0.002
316	1193	GO:0060253	0.002
317	333	GO:0007089	0.002
318	115	GO:0001885	0.002
319	1274	GO:0070531	0.002
320	482	GO:0015129	0.002
321	841	GO:0035708	0.002
322	533	GO:0016817	0.002
323	851	GO:0035987	0.002
324	804	GO:0035020	0.002
325	139	GO:0002763	0.002
326	681	GO:0031508	0.002
327	609	GO:0030030	0.002
328	1289	GO:0070969	0.002
329	1150	GO:0051782	0.002
330	846	GO:0035873	0.002
331	585	GO:0021569	0.002
332	69	GO:0000793	0.002
333	1272	GO:0070483	0.002
334	1317	GO:0071779	0.002
335	758	GO:0033262	0.002
336	518	GO:0016574	0.002
337	750	GO:0033128	0.002
338	314	GO:0006975	0.002
339	1166	GO:0052657	0.002
340	771	GO:0033673	0.002
341	928	GO:0043393	0.002
342	402	GO:0008623	0.002
343	91	GO:0001042	0.002
344	1119	GO:0051276	0.002
345	490	GO:0015727	0.002
346	605	GO:0022891	0.002
347	929	GO:0043409	0.002
348	73	GO:0000797	0.002
349	981	GO:0045604	0.002
350	840	GO:0035624	0.002
351	712	GO:0032214	0.002
352	1293	GO:0071141	0.002
353	843	GO:0035712	0.002
354	1383	GO:2000144	0.002
355	1277	GO:0070577	0.002
356	1107	GO:0051096	0.002
357	766	GO:0033594	0.001
358	1257	GO:0070087	0.001
359	171	GO:0003985	0.001
360	645	GO:0030857	0.001
361	1403	GO:2000777	0.001
362	286	GO:0006310	0.001
363	278	GO:0006288	0.001
364	653	GO:0031056	0.001
365	1102	GO:0050820	0.001
366	783	GO:0034080	0.001
367	526	GO:0016592	0.001
368	634	GO:0030500	0.001
369	925	GO:0043297	0.001
370	1381	GO:2000111	0.001
371	13	GO:0000079	0.001
372	848	GO:0035978	0.001
373	1281	GO:0070734	0.001
374	98	GO:0001309	0.001
375	1022	GO:0046040	0.001
376	461	GO:0010936	0.001
377	782	GO:0034063	0.001
378	1068	GO:0048386	0.001
379	335	GO:0007091	0.001
380	312	GO:0006958	0.001
381	1060	GO:0048096	0.001
382	183	GO:0004514	0.001
383	976	GO:0045175	0.001
384	1374	GO:1900281	0.001
385	443	GO:0010484	0.001
386	693	GO:0031627	0.001
387	360	GO:0007356	0.001
388	255	GO:0005902	0.001
389	1415	GO:2001241	0.001
390	1012	GO:0045910	0.001
391	934	GO:0043504	0.001
392	59	GO:0000775	0.001
393	745	GO:0032916	0.001
394	1075	GO:0048592	0.001
395	1079	GO:0048645	0.001
396	832	GO:0035501	0.001
397	808	GO:0035064	0.001
398	619	GO:0030221	0.001
399	1027	GO:0046100	0.001
400	946	GO:0043564	0.001
401	967	GO:0045069	0.001
402	660	GO:0031104	0.001
403	1004	GO:0045842	0
404	793	GO:0034616	0
405	374	GO:0008094	0
406	917	GO:0043220	0
407	809	GO:0035098	0
408	64	GO:0000780	0
409	1063	GO:0048168	0
410	536	GO:0016874	0
411	725	GO:0032405	0
412	97	GO:0001300	0
413	1296	GO:0071168	0
414	936	GO:0043516	0
415	537	GO:0016925	0
416	438	GO:0010389	0
417	932	GO:0043484	0
418	92	GO:0001046	0
419	908	GO:0043125	0
420	220	GO:0005488	0
421	831	GO:0035500	0
422	626	GO:0030332	0
423	310	GO:0006956	0
424	1152	GO:0051880	0
425	224	GO:0005520	0
426	978	GO:0045197	0
427	12	GO:0000077	0
428	1021	GO:0046038	0
429	667	GO:0031262	0
430	389	GO:0008347	0
431	1084	GO:0048730	0
432	239	GO:0005663	0
433	615	GO:0030145	0
434	575	GO:0019789	0
435	1072	GO:0048478	0
436	1134	GO:0051489	0
437	956	GO:0043997	0
438	394	GO:0008413	0
439	654	GO:0031065	0
440	1411	GO:2001076	0
441	844	GO:0035748	0
442	346	GO:0007127	0
443	408	GO:0008853	0
444	548	GO:0017145	0
445	546	GO:0017124	0
446	424	GO:0009432	0
447	145	GO:0003131	0
448	577	GO:0019835	0
449	1125	GO:0051310	0
450	36	GO:0000302	0
451	715	GO:0032298	0
452	1094	GO:0050431	0
453	282	GO:0006301	0
454	246	GO:0005726	0
455	567	GO:0019208	0
456	386	GO:0008280	0
457	541	GO:0017017	0
458	1064	GO:0048208	0
459	1199	GO:0060393	0
460	921	GO:0043254	0
461	555	GO:0018205	0
462	1047	GO:0046985	0
463	173	GO:0004003	0
464	104	GO:0001669	0
465	231	GO:0005602	0
466	895	GO:0042992	0
467	369	GO:0007622	0
468	1368	GO:0097149	0
469	638	GO:0030530	0
470	304	GO:0006470	0
471	348	GO:0007131	0
472	1139	GO:0051534	-0.001
473	836	GO:0035539	-0.001
474	227	GO:0005534	-0.001
475	919	GO:0043240	-0.001
476	795	GO:0034648	-0.001
477	31	GO:0000236	-0.001
478	579	GO:0019900	-0.001
479	880	GO:0042471	-0.001
480	1408	GO:2001033	-0.001
481	102	GO:0001556	-0.001
482	1258	GO:0070123	-0.001
483	883	GO:0042524	-0.001
484	1209	GO:0060523	-0.001
485	1008	GO:0045870	-0.001
486	450	GO:0010626	-0.001
487	774	GO:0033690	-0.001
488	705	GO:0032139	-0.001
489	1312	GO:0071564	-0.001
490	1123	GO:0051298	-0.001
491	1391	GO:2000481	-0.001
492	263	GO:0006203	-0.001
493	378	GO:0008147	-0.001
494	818	GO:0035261	-0.001
495	620	GO:0030261	-0.001
496	1263	GO:0070306	-0.001
497	219	GO:0005355	-0.001
498	676	GO:0031436	-0.001
499	1245	GO:0061146	-0.001
500	1145	GO:0051649	-0.001
501	825	GO:0035359	-0.001
502	213	GO:0005173	-0.001
503	651	GO:0031052	-0.001
504	418	GO:0009263	-0.001
505	798	GO:0034699	-0.001
506	284	GO:0006303	-0.001
507	377	GO:0008138	-0.001
508	924	GO:0043296	-0.001
509	160	GO:0003696	-0.001
510	920	GO:0043243	-0.001
511	167	GO:0003906	-0.001
512	593	GO:0021799	-0.001
513	947	GO:0043566	-0.001
514	445	GO:0010506	-0.001
515	228	GO:0005540	-0.001
516	1314	GO:0071732	-0.001
517	474	GO:0014067	-0.001
518	252	GO:0005873	-0.001
519	592	GO:0021702	-0.001
520	1404	GO:2000779	-0.001
521	757	GO:0033261	-0.001
522	696	GO:0031648	-0.001
523	543	GO:0017091	-0.001
524	355	GO:0007258	-0.001
525	444	GO:0010485	-0.001
526	1398	GO:2000685	-0.001
527	279	GO:0006289	-0.001
528	822	GO:0035330	-0.001
529	306	GO:0006513	-0.001
530	770	GO:0033629	-0.001
531	179	GO:0004146	-0.001
532	429	GO:0010070	-0.001
533	108	GO:0001741	-0.002
534	1366	GO:0097021	-0.002
535	1014	GO:0045931	-0.002
536	612	GO:0030056	-0.002
537	425	GO:0009628	-0.002
538	292	GO:0006337	-0.002
539	560	GO:0019035	-0.002
540	206	GO:0005010	-0.002
541	875	GO:0042325	-0.002
542	703	GO:0032137	-0.002
543	803	GO:0035014	-0.002
544	27	GO:0000188	-0.002
545	859	GO:0040001	-0.002
546	1310	GO:0071480	-0.002
547	679	GO:0031497	-0.002
548	1020	GO:0045995	-0.002
549	884	GO:0042551	-0.002
550	3	GO:0000018	-0.002
551	1223	GO:0060687	-0.002
552	632	GO:0030449	-0.002
553	980	GO:0045502	-0.002
554	1375	GO:1900625	-0.002
555	200	GO:0004748	-0.002
556	1006	GO:0045859	-0.002
557	595	GO:0021873	-0.002
558	198	GO:0004725	-0.002
559	558	GO:0019005	-0.002
560	1311	GO:0071559	-0.002
561	1337	GO:0072205	-0.002
562	780	GO:0033993	-0.002
563	5	GO:0000022	-0.002
564	2	GO:0000014	-0.002
565	1440	hsa05130	-0.002
566	324	GO:0007059	-0.002
567	781	GO:0034056	-0.002
568	680	GO:0031507	-0.002
569	714	GO:0032290	-0.002
570	1225	GO:0060710	-0.002
571	1401	GO:2000773	-0.002
572	633	GO:0030496	-0.002
573	53	GO:0000723	-0.002
574	622	GO:0030277	-0.002
575	1421	hsa04710	-0.002
576	128	GO:0002204	-0.002
577	197	GO:0004721	-0.002
578	1266	GO:0070403	-0.002
579	421	GO:0009330	-0.002
580	364	GO:0007500	-0.002
581	544	GO:0017108	-0.002
582	1239	GO:0060968	-0.002
583	505	GO:0016363	-0.002
584	1256	GO:0070022	-0.002
585	1407	GO:2001022	-0.002
586	616	GO:0030174	-0.002
587	1349	GO:0085020	-0.003
588	853	GO:0036002	-0.003
589	614	GO:0030100	-0.003
590	1118	GO:0051256	-0.003
591	454	GO:0010767	-0.003
592	969	GO:0045109	-0.003
593	1380	GO:2000045	-0.003
594	332	GO:0007088	-0.003
595	1338	GO:0072221	-0.003
596	1172	GO:0055056	-0.003
597	61	GO:0000777	-0.003
598	1330	GO:0072133	-0.003
599	311	GO:0006957	-0.003
600	1029	GO:0046329	-0.003
601	287	GO:0006311	-0.003
602	511	GO:0016504	-0.003
603	975	GO:0045171	-0.003
604	1301	GO:0071335	-0.003
605	646	GO:0030870	-0.003
606	415	GO:0009157	-0.003
607	1173	GO:0055062	-0.003
608	208	GO:0005072	-0.003
609	849	GO:0035985	-0.003
610	1071	GO:0048477	-0.003
611	524	GO:0016589	-0.003
612	724	GO:0032403	-0.003
613	75	GO:0000801	-0.003
614	40	GO:0000381	-0.003
615	211	GO:0005114	-0.003
616	237	GO:0005658	-0.003
617	1203	GO:0060442	-0.003
618	755	GO:0033186	-0.003
619	110	GO:0001817	-0.003
620	837	GO:0035562	-0.003
621	916	GO:0043219	-0.003
622	1394	GO:2000615	-0.003
623	1229	GO:0060743	-0.003
624	234	GO:0005652	-0.003
625	683	GO:0031527	-0.003
626	522	GO:0016584	-0.003
627	1212	GO:0060564	-0.003
628	747	GO:0032967	-0.003
629	926	GO:0043372	-0.003
630	534	GO:0016818	-0.003
631	401	GO:0008608	-0.003
632	4	GO:0000019	-0.003
633	941	GO:0043539	-0.003
634	643	GO:0030838	-0.003
635	340	GO:0007096	-0.003
636	1363	GO:0090402	-0.003
637	861	GO:0040016	-0.003
638	971	GO:0045128	-0.003
639	694	GO:0031643	-0.003
640	225	GO:0005522	-0.003
641	264	GO:0006231	-0.003
642	623	GO:0030284	-0.003
643	1270	GO:0070419	-0.003
644	1233	GO:0060765	-0.003
645	426	GO:0009650	-0.003
646	1147	GO:0051668	-0.003
647	678	GO:0031492	-0.003
648	316	GO:0007004	-0.003
649	640	GO:0030617	-0.003
650	904	GO:0043085	-0.003
651	1217	GO:0060599	-0.004
652	1423	hsa04610	-0.004
653	112	GO:0001833	-0.004
654	813	GO:0035189	-0.004
655	998	GO:0045769	-0.004
656	568	GO:0019211	-0.004
657	392	GO:0008408	-0.004
658	193	GO:0004693	-0.004
659	821	GO:0035312	-0.004
660	938	GO:0043518	-0.004
661	476	GO:0014740	-0.004
662	1188	GO:0060123	-0.004
663	194	GO:0004705	-0.004
664	151	GO:0003279	-0.004
665	687	GO:0031573	-0.004
666	202	GO:0004799	-0.004
667	1174	GO:0055096	-0.004
668	1325	GO:0072017	-0.004
669	514	GO:0016568	-0.004
670	661	GO:0031110	-0.004
671	530	GO:0016607	-0.004
672	496	GO:0016050	-0.004
673	974	GO:0045145	-0.004
674	1082	GO:0048713	-0.004
675	610	GO:0030032	-0.004
676	1	GO:0000012	-0.004
677	1224	GO:0060693	-0.004
678	317	GO:0007018	-0.004
679	788	GO:0034405	-0.004
680	359	GO:0007346	-0.004
681	677	GO:0031441	-0.004
682	199	GO:0004726	-0.004
683	850	GO:0035986	-0.004
684	221	GO:0005496	-0.004
685	1146	GO:0051661	-0.004
686	948	GO:0043570	-0.004
687	1242	GO:0061035	-0.004
688	1157	GO:0051908	-0.004
689	864	GO:0042054	-0.004
690	1154	GO:0051893	-0.004
691	365	GO:0007501	-0.004
692	275	GO:0006281	-0.004
693	141	GO:0002904	-0.004
694	321	GO:0007051	-0.004
695	1033	GO:0046620	-0.004
696	113	GO:0001841	-0.004
697	722	GO:0032389	-0.004
698	810	GO:0035117	-0.004
699	756	GO:0033205	-0.004
700	1412	GO:2001141	-0.004
701	85	GO:0000940	-0.004
702	552	GO:0018026	-0.004
703	905	GO:0043089	-0.004
704	1034	GO:0046627	-0.004
705	147	GO:0003180	-0.004
706	1024	GO:0046078	-0.004
707	1183	GO:0060056	-0.004
708	1259	GO:0070173	-0.004
709	987	GO:0045663	-0.004
710	344	GO:0007113	-0.004
711	462	GO:0010944	-0.004
712	233	GO:0005637	-0.005
713	911	GO:0043138	-0.005
714	737	GO:0032794	-0.005
715	78	GO:0000819	-0.005
716	986	GO:0045662	-0.005
717	823	GO:0035335	-0.005
718	772	GO:0033674	-0.005
719	564	GO:0019088	-0.005
720	603	GO:0022614	-0.005
721	1136	GO:0051492	-0.005
722	1352	GO:0090004	-0.005
723	140	GO:0002821	-0.005
724	7	GO:0000070	-0.005
725	1222	GO:0060686	-0.005
726	801	GO:0034968	-0.005
727	716	GO:0032301	-0.005
728	650	GO:0030971	-0.005
729	740	GO:0032873	-0.005
730	1140	GO:0051571	-0.005
731	143	GO:0003014	-0.005
732	1299	GO:0071283	-0.005
733	398	GO:0008467	-0.005
734	1080	GO:0048678	-0.005
735	1388	GO:2000377	-0.005
736	949	GO:0043586	-0.005
737	185	GO:0004518	-0.005
738	1143	GO:0051575	-0.005
739	1232	GO:0060750	-0.005
740	576	GO:0019799	-0.005
741	791	GO:0034501	-0.005
742	608	GO:0030027	-0.005
743	30	GO:0000228	-0.005
744	1170	GO:0055013	-0.005
745	945	GO:0043550	-0.005
746	1038	GO:0046683	-0.005
747	248	GO:0005768	-0.005
748	96	GO:0001106	-0.005
749	807	GO:0035051	-0.005
750	1278	GO:0070668	-0.005
751	727	GO:0032436	-0.005
752	573	GO:0019724	-0.005
753	322	GO:0007052	-0.005
754	1121	GO:0051290	-0.005
755	1135	GO:0051491	-0.005
756	155	GO:0003678	-0.005
757	636	GO:0030520	-0.005
758	805	GO:0035021	-0.005
759	58	GO:0000739	-0.005
760	80	GO:0000910	-0.005
761	1329	GO:0072125	-0.005
762	270	GO:0006266	-0.005
763	1214	GO:0060576	-0.005
764	362	GO:0007422	-0.005
765	515	GO:0016570	-0.005
766	707	GO:0032143	-0.005
767	521	GO:0016581	-0.006
768	952	GO:0043697	-0.006
769	368	GO:0007618	-0.006
770	277	GO:0006284	-0.006
771	662	GO:0031116	-0.006
772	1252	GO:0061360	-0.006
773	1346	GO:0072686	-0.006
774	493	GO:0015917	-0.006
775	60	GO:0000776	-0.006
776	1236	GO:0060789	-0.006
777	754	GO:0033158	-0.006
778	72	GO:0000796	-0.006
779	137	GO:0002591	-0.006
780	599	GO:0021978	-0.006
781	977	GO:0045190	-0.006
782	1385	GO:2000191	-0.006
783	354	GO:0007221	-0.006
784	134	GO:0002485	-0.006
785	529	GO:0016605	-0.006
786	1350	GO:0085029	-0.006
787	708	GO:0032154	-0.006
788	1001	GO:0045792	-0.006
789	133	GO:0002481	-0.006
790	29	GO:0000216	-0.006
791	1267	GO:0070410	-0.006
792	62	GO:0000778	-0.006
793	726	GO:0032407	-0.006
794	644	GO:0030850	-0.006
795	135	GO:0002489	-0.006
796	289	GO:0006325	-0.006
797	473	GO:0014044	-0.006
798	582	GO:0019985	-0.006
799	1241	GO:0061029	-0.006
800	871	GO:0042176	-0.006
801	55	GO:0000730	-0.006
802	999	GO:0045778	-0.006
803	863	GO:0040038	-0.006
804	469	GO:0014002	-0.006
805	587	GO:0021633	-0.006
806	1161	GO:0051987	-0.006
807	617	GO:0030175	-0.006
808	1030	GO:0046600	-0.006
809	826	GO:0035371	-0.006
810	865	GO:0042058	-0.006
811	446	GO:0010569	-0.006
812	204	GO:0004882	-0.006
813	8	GO:0000072	-0.006
814	630	GO:0030422	-0.006
815	1302	GO:0071353	-0.006
816	57	GO:0000733	-0.006
817	44	GO:0000404	-0.006
818	866	GO:0042063	-0.006
819	1342	GO:0072362	-0.006
820	319	GO:0007049	-0.006
821	1306	GO:0071455	-0.006
822	393	GO:0008409	-0.006
823	447	GO:0010592	-0.006
824	517	GO:0016573	-0.007
825	1151	GO:0051797	-0.007
826	103	GO:0001558	-0.007
827	1054	GO:0047485	-0.007
828	205	GO:0005006	-0.007
829	561	GO:0019047	-0.007
830	22	GO:0000090	-0.007
831	588	GO:0021650	-0.007
832	507	GO:0016447	-0.007
833	1425	hsa04144	-0.007
834	434	GO:0010225	-0.007
835	1201	GO:0060433	-0.007
836	1221	GO:0060685	-0.007
837	351	GO:0007162	-0.007
838	71	GO:0000795	-0.007
839	301	GO:0006461	-0.007
840	318	GO:0007019	-0.007
841	1322	GO:0071922	-0.007
842	186	GO:0004520	-0.007
843	256	GO:0005938	-0.007
844	1348	GO:0080134	-0.007
845	760	GO:0033504	-0.007
846	265	GO:0006235	-0.007
847	962	GO:0044428	-0.007
848	257	GO:0005958	-0.007
849	790	GO:0034446	-0.007
850	1018	GO:0045955	-0.007
851	382	GO:0008262	-0.007
852	111	GO:0001832	-0.007
853	1220	GO:0060684	-0.007
854	1037	GO:0046680	-0.007
855	1231	GO:0060748	-0.007
856	746	GO:0032956	-0.007
857	566	GO:0019104	-0.007
858	356	GO:0007276	-0.007
859	372	GO:0008045	-0.007
860	157	GO:0003684	-0.007
861	903	GO:0043067	-0.007
862	743	GO:0032886	-0.007
863	1100	GO:0050773	-0.007
864	1031	GO:0046601	-0.007
865	191	GO:0004674	-0.007
866	1265	GO:0070372	-0.007
867	268	GO:0006261	-0.007
868	506	GO:0016446	-0.007
869	671	GO:0031333	-0.007
870	26	GO:0000183	-0.007
871	618	GO:0030214	-0.007
872	751	GO:0033145	-0.007
873	272	GO:0006270	-0.007
874	1206	GO:0060503	-0.007
875	1104	GO:0051019	-0.007
876	551	GO:0018024	-0.007
877	107	GO:0001726	-0.007
878	164	GO:0003777	-0.007
879	432	GO:0010212	-0.007
880	1282	GO:0070742	-0.008
881	214	GO:0005176	-0.008
882	16	GO:0000083	-0.008
883	519	GO:0016575	-0.008
884	122	GO:0002011	-0.008
885	856	GO:0038028	-0.008
886	955	GO:0043967	-0.008
887	238	GO:0005662	-0.008
888	1393	GO:2000597	-0.008
889	428	GO:0009912	-0.008
890	1437	hsa04114	-0.008
891	802	GO:0034979	-0.008
892	1253	GO:0061383	-0.008
893	1424	hsa03030	-0.008
894	570	GO:0019237	-0.008
895	223	GO:0005515	-0.008
896	132	GO:0002328	-0.008
897	1327	GO:0072097	-0.008
898	331	GO:0007080	-0.008
899	565	GO:0019102	-0.008
900	1132	GO:0051444	-0.008
901	63	GO:0000779	-0.008
902	1218	GO:0060623	-0.008
903	1086	GO:0048762	-0.008
904	597	GO:0021897	-0.008
905	46	GO:0000406	-0.008
906	90	GO:0001012	-0.008
907	690	GO:0031616	-0.008
908	695	GO:0031647	-0.008
909	442	GO:0010469	-0.008
910	1005	GO:0045843	-0.008
911	326	GO:0007063	-0.008
912	1323	GO:0071930	-0.008
913	329	GO:0007076	-0.008
914	1155	GO:0051898	-0.008
915	1400	GO:2000757	-0.008
916	101	GO:0001547	-0.008
917	1116	GO:0051233	-0.008
918	87	GO:0000978	-0.008
919	984	GO:0045618	-0.008
920	773	GO:0033688	-0.008
921	717	GO:0032302	-0.008
922	1128	GO:0051351	-0.008
923	209	GO:0005080	-0.008
924	1088	GO:0048812	-0.008
925	729	GO:0032508	-0.008
926	847	GO:0035887	-0.008
927	1162	GO:0051988	-0.008
928	472	GO:0014040	-0.008
929	144	GO:0003130	-0.008
930	416	GO:0009186	-0.009
931	838	GO:0035566	-0.009
932	923	GO:0043281	-0.009
933	613	GO:0030098	-0.009
934	1294	GO:0071157	-0.009
935	373	GO:0008054	-0.009
936	1089	GO:0048870	-0.009
937	1087	GO:0048808	-0.009
938	709	GO:0032181	-0.009
939	294	GO:0006343	-0.009
940	1078	GO:0048642	-0.009
941	1213	GO:0060565	-0.009
942	1362	GO:0090399	-0.009
943	1069	GO:0048392	-0.009
944	267	GO:0006260	-0.009
945	162	GO:0003712	-0.009
946	989	GO:0045685	-0.009
947	639	GO:0030616	-0.009
948	323	GO:0007057	-0.009
949	210	GO:0005113	-0.009
950	1290	GO:0070974	-0.009
951	682	GO:0031523	-0.009
952	1039	GO:0046686	-0.009
953	280	GO:0006297	-0.009
954	631	GO:0030423	-0.009
955	105	GO:0001673	-0.009
956	1141	GO:0051573	-0.009
957	309	GO:0006921	-0.009
958	1205	GO:0060502	-0.009
959	330	GO:0007079	-0.009
960	824	GO:0035358	-0.009
961	954	GO:0043932	-0.009
962	161	GO:0003697	-0.009
963	711	GO:0032204	-0.009
964	28	GO:0000212	-0.009
965	600	GO:0022011	-0.009
966	68	GO:0000792	-0.009
967	338	GO:0007094	-0.009
968	1083	GO:0048714	-0.009
969	909	GO:0043130	-0.009
970	1361	GO:0090307	-0.009
971	88	GO:0000987	-0.009
972	1208	GO:0060520	-0.01
973	504	GO:0016310	-0.01
974	467	GO:0010997	-0.01
975	212	GO:0005158	-0.01
976	1356	GO:0090194	-0.01
977	48	GO:0000701	-0.01
978	674	GO:0031393	-0.01
979	935	GO:0043515	-0.01
980	512	GO:0016514	-0.01
981	404	GO:0008630	-0.01
982	799	GO:0034713	-0.01
983	273	GO:0006271	-0.01
984	1315	GO:0071777	-0.01
985	118	GO:0001939	-0.01
986	881	GO:0042487	-0.01
987	460	GO:0010906	-0.01
988	95	GO:0001103	-0.01
989	702	GO:0032133	-0.01
990	456	GO:0010792	-0.01
991	1230	GO:0060744	-0.01
992	1016	GO:0045945	-0.01
993	1251	GO:0061351	-0.01
994	240	GO:0005677	-0.01
995	1184	GO:0060065	-0.01
996	1133	GO:0051488	-0.01
997	1331	GO:0072134	-0.01
998	606	GO:0023014	-0.01
999	898	GO:0043009	-0.01
1000	1171	GO:0055020	-0.01
1001	84	GO:0000939	-0.01
1002	423	GO:0009411	-0.01
1003	787	GO:0034391	-0.01
1004	990	GO:0045720	-0.01
1005	93	GO:0001047	-0.01
1006	951	GO:0043626	-0.01
1007	1244	GO:0061045	-0.01
1008	860	GO:0040009	-0.01
1009	786	GO:0034244	-0.01
1010	1137	GO:0051493	-0.01
1011	1399	GO:2000726	-0.011
1012	83	GO:0000922	-0.011
1013	1313	GO:0071681	-0.011
1014	873	GO:0042246	-0.011
1015	1397	GO:2000655	-0.011
1016	86	GO:0000942	-0.011
1017	877	GO:0042393	-0.011
1018	1215	GO:0060592	-0.011
1019	942	GO:0043542	-0.011
1020	43	GO:0000403	-0.011
1021	889	GO:0042692	-0.011
1022	684	GO:0031536	-0.011
1023	1002	GO:0045793	-0.011
1024	1395	GO:2000617	-0.011
1025	1198	GO:0060391	-0.011
1026	290	GO:0006333	-0.011
1027	1176	GO:0055105	-0.011
1028	1436	hsa03420	-0.011
1029	1207	GO:0060512	-0.011
1030	996	GO:0045765	-0.011
1031	1390	GO:2000480	-0.011
1032	699	GO:0032077	-0.011
1033	297	GO:0006351	-0.011
1034	635	GO:0030511	-0.011
1035	70	GO:0000794	-0.011
1036	1237	GO:0060804	-0.011
1037	495	GO:0015995	-0.011
1038	578	GO:0019899	-0.011
1039	188	GO:0004525	-0.011
1040	439	GO:0010458	-0.011
1041	994	GO:0045739	-0.011
1042	1304	GO:0071391	-0.011
1043	411	GO:0009008	-0.011
1044	852	GO:0035990	-0.011
1045	1036	GO:0046677	-0.012
1046	547	GO:0017136	-0.012
1047	886	GO:0042555	-0.012
1048	1235	GO:0060768	-0.012
1049	341	GO:0007098	-0.012
1050	540	GO:0017015	-0.012
1051	56	GO:0000731	-0.012
1052	148	GO:0003183	-0.012
1053	1131	GO:0051443	-0.012
1054	243	GO:0005719	-0.012
1055	187	GO:0004523	-0.012
1056	1384	GO:2000145	-0.012
1057	370	GO:0008013	-0.012
1058	466	GO:0010994	-0.012
1059	1333	GO:0072161	-0.012
1060	494	GO:0015979	-0.012
1061	896	GO:0042993	-0.012
1062	120	GO:0001953	-0.012
1063	1340	GO:0072305	-0.012
1064	723	GO:0032390	-0.012
1065	1062	GO:0048147	-0.012
1066	535	GO:0016851	-0.012
1067	1396	GO:2000620	-0.012
1068	130	GO:0002244	-0.012
1069	1159	GO:0051983	-0.012
1070	857	GO:0038052	-0.012
1071	89	GO:0000988	-0.012
1072	628	GO:0030337	-0.012
1073	523	GO:0016585	-0.012
1074	334	GO:0007090	-0.012
1075	1070	GO:0048471	-0.012
1076	1113	GO:0051154	-0.012
1077	296	GO:0006346	-0.012
1078	1246	GO:0061149	-0.012
1079	15	GO:0000082	-0.012
1080	542	GO:0017053	-0.012
1081	21	GO:0000089	-0.012
1082	242	GO:0005712	-0.012
1083	862	GO:0040020	-0.012
1084	254	GO:0005901	-0.012
1085	342	GO:0007100	-0.012
1086	858	GO:0039003	-0.012
1087	52	GO:0000722	-0.012
1088	1099	GO:0050694	-0.012
1089	1419	hsa04110	-0.013
1090	1096	GO:0050678	-0.013
1091	486	GO:0015247	-0.013
1092	1336	GO:0072200	-0.013
1093	1273	GO:0070512	-0.013
1094	641	GO:0030618	-0.013
1095	1148	GO:0051726	-0.013
1096	127	GO:0002177	-0.013
1097	361	GO:0007403	-0.013
1098	236	GO:0005657	-0.013
1099	697	GO:0031798	-0.013
1100	890	GO:0042770	-0.013
1101	817	GO:0035252	-0.013
1102	1120	GO:0051280	-0.013
1103	119	GO:0001940	-0.013
1104	1405	GO:2001012	-0.013
1105	109	GO:0001783	-0.013
1106	1392	GO:2000594	-0.013
1107	250	GO:0005819	-0.013
1108	503	GO:0016301	-0.013
1109	940	GO:0043535	-0.013
1110	1210	GO:0060528	-0.013
1111	777	GO:0033872	-0.013
1112	914	GO:0043148	-0.013
1113	1017	GO:0045950	-0.013
1114	742	GO:0032880	-0.013
1115	11	GO:0000076	-0.013
1116	259	GO:0005996	-0.013
1117	437	GO:0010369	-0.013
1118	1335	GO:0072198	-0.013
1119	1057	GO:0048009	-0.013
1120	305	GO:0006476	-0.013
1121	1373	GO:1900218	-0.013
1122	1202	GO:0060440	-0.013
1123	1417	hsa03410	-0.013
1124	785	GO:0034224	-0.013
1125	1359	GO:0090267	-0.014
1126	336	GO:0007092	-0.014
1127	1268	GO:0070411	-0.014
1128	339	GO:0007095	-0.014
1129	1326	GO:0072044	-0.014
1130	1334	GO:0072192	-0.014
1131	607	GO:0030010	-0.014
1132	698	GO:0031937	-0.014
1133	1081	GO:0048712	-0.014
1134	1372	GO:1900215	-0.014
1135	1354	GO:0090096	-0.014
1136	1219	GO:0060662	-0.014
1137	20	GO:0000088	-0.014
1138	819	GO:0035264	-0.014
1139	601	GO:0022037	-0.014
1140	710	GO:0032201	-0.014
1141	520	GO:0016580	-0.014
1142	498	GO:0016202	-0.014
1143	1248	GO:0061155	-0.014
1144	763	GO:0033561	-0.014
1145	406	GO:0008634	-0.014
1146	1262	GO:0070301	-0.014
1147	733	GO:0032570	-0.014
1148	226	GO:0005524	-0.014
1149	1371	GO:1900212	-0.015
1150	244	GO:0005721	-0.015
1151	271	GO:0006268	-0.015
1152	1112	GO:0051150	-0.015
1153	1285	GO:0070848	-0.015
1154	959	GO:0044346	-0.015
1155	531	GO:0016772	-0.015
1156	1321	GO:0071893	-0.015
1157	1124	GO:0051301	-0.015
1158	431	GO:0010165	-0.015
1159	961	GO:0044419	-0.015
1160	51	GO:0000720	-0.015
1161	1073	GO:0048565	-0.015
1162	253	GO:0005876	-0.015
1163	794	GO:0034644	-0.015
1164	152	GO:0003289	-0.015
1165	1328	GO:0072101	-0.015
1166	328	GO:0007067	-0.015
1167	1414	GO:2001220	-0.015
1168	508	GO:0016477	-0.015
1169	1046	GO:0046983	-0.015
1170	1247	GO:0061151	-0.015
1171	1297	GO:0071173	-0.016
1172	433	GO:0010216	-0.016
1173	337	GO:0007093	-0.016
1174	1226	GO:0060738	-0.016
1175	1343	GO:0072428	-0.016
1176	14	GO:0000080	-0.016
1177	1442	hsa04914	-0.016
1178	1376	GO:2000005	-0.016
1179	1432	hsa03430	-0.016
1180	293	GO:0006338	-0.016
1181	1032	GO:0046602	-0.016
1182	891	GO:0042771	-0.016
1183	1377	GO:2000007	-0.016
1184	700	GO:0032091	-0.016
1185	10	GO:0000075	-0.016
1186	930	GO:0043425	-0.016
1187	315	GO:0006978	-0.016
1188	1138	GO:0051496	-0.016
1189	100	GO:0001542	-0.016
1190	42	GO:0000400	-0.016
1191	353	GO:0007183	-0.016
1192	1287	GO:0070932	-0.016
1193	358	GO:0007283	-0.016
1194	1382	GO:2000137	-0.016
1195	350	GO:0007144	-0.016
1196	893	GO:0042826	-0.016
1197	1234	GO:0060766	-0.017
1198	303	GO:0006469	-0.017
1199	1067	GO:0048340	-0.017
1200	910	GO:0043137	-0.017
1201	1043	GO:0046889	-0.017
1202	1160	GO:0051984	-0.017
1203	1228	GO:0060742	-0.017
1204	562	GO:0019049	-0.017
1205	235	GO:0005654	-0.017
1206	827	GO:0035402	-0.017
1207	581	GO:0019904	-0.017
1208	17	GO:0000084	-0.017
1209	66	GO:0000785	-0.017
1210	744	GO:0032909	-0.017
1211	1065	GO:0048256	-0.017
1212	1288	GO:0070933	-0.017
1213	34	GO:0000278	-0.017
1214	992	GO:0045727	-0.017
1215	907	GO:0043124	-0.017
1216	371	GO:0008022	-0.017
1217	828	GO:0035407	-0.018
1218	94	GO:0001102	-0.018
1219	124	GO:0002062	-0.018
1220	806	GO:0035033	-0.018
1221	652	GO:0031053	-0.018
1222	190	GO:0004672	-0.018
1223	357	GO:0007281	-0.018
1224	1300	GO:0071285	-0.018
1225	1180	GO:0060039	-0.018
1226	979	GO:0045445	-0.018
1227	892	GO:0042802	-0.018
1228	302	GO:0006468	-0.018
1229	602	GO:0022408	-0.018
1230	281	GO:0006298	-0.019
1231	420	GO:0009314	-0.019
1232	285	GO:0006309	-0.019
1233	1353	GO:0090007	-0.019
1234	598	GO:0021956	-0.019
1235	1098	GO:0050681	-0.019
1236	163	GO:0003714	-0.019
1237	1364	GO:0090409	-0.019
1238	748	GO:0032993	-0.019
1239	1276	GO:0070557	-0.019
1240	769	GO:0033600	-0.019
1241	1370	GO:1900102	-0.019
1242	352	GO:0007173	-0.019
1243	762	GO:0033558	-0.019
1244	655	GO:0031069	-0.019
1245	1153	GO:0051882	-0.02
1246	1227	GO:0060740	-0.02
1247	1360	GO:0090290	-0.02
1248	367	GO:0007569	-0.02
1249	584	GO:0021528	-0.02
1250	453	GO:0010718	-0.02
1251	37	GO:0000307	-0.02
1252	1295	GO:0071158	-0.02
1253	196	GO:0004713	-0.02
1254	1438	hsa04115	-0.02
1255	1052	GO:0047389	-0.02
1256	816	GO:0035251	-0.02
1257	1307	GO:0071459	-0.02
1258	933	GO:0043491	-0.021
1259	820	GO:0035299	-0.021
1260	627	GO:0030336	-0.021
1261	387	GO:0008283	-0.021
1262	1367	GO:0097037	-0.021
1263	1416	hsa04520	-0.021
1264	35	GO:0000279	-0.021
1265	1249	GO:0061198	-0.021
1266	1365	GO:0090410	-0.021
1267	553	GO:0018105	-0.021
1268	247	GO:0005737	-0.021
1269	1051	GO:0047290	-0.021
1270	123	GO:0002039	-0.021
1271	1108	GO:0051098	-0.022
1272	663	GO:0031134	-0.022
1273	1049	GO:0047220	-0.022
1274	528	GO:0016604	-0.022
1275	441	GO:0010468	-0.022
1276	1091	GO:0050201	-0.022
1277	154	GO:0003677	-0.022
1278	1358	GO:0090230	-0.022
1279	672	GO:0031338	-0.022
1280	768	GO:0033598	-0.022
1281	554	GO:0018107	-0.022
1282	637	GO:0030521	-0.022
1283	1076	GO:0048598	-0.022
1284	1427	hsa04012	-0.022
1285	735	GO:0032618	-0.022
1286	734	GO:0032581	-0.023
1287	1269	GO:0070412	-0.023
1288	67	GO:0000790	-0.023
1289	131	GO:0002320	-0.023
1290	665	GO:0031209	-0.023
1291	375	GO:0008118	-0.023
1292	685	GO:0031571	-0.023
1293	381	GO:0008251	-0.023
1294	1444	hsa05222	-0.023
1295	1410	GO:2001045	-0.023
1296	405	GO:0008633	-0.024
1297	872	GO:0042177	-0.024
1298	1092	GO:0050333	-0.024
1299	688	GO:0031575	-0.024
1300	720	GO:0032355	-0.024
1301	583	GO:0021515	-0.024
1302	1093	GO:0050353	-0.024
1303	136	GO:0002520	-0.024
1304	689	GO:0031591	-0.024
1305	6	GO:0000026	-0.024
1306	1255	GO:0061419	-0.024
1307	33	GO:0000240	-0.025
1308	1053	GO:0047394	-0.025
1309	38	GO:0000379	-0.025
1310	149	GO:0003264	-0.025
1311	647	GO:0030879	-0.025
1312	778	GO:0033897	-0.025
1313	692	GO:0031625	-0.025
1314	776	GO:0033842	-0.025
1315	1040	GO:0046777	-0.025
1316	366	GO:0007507	-0.025
1317	1055	GO:0047730	-0.026
1318	146	GO:0003160	-0.026
1319	624	GO:0030308	-0.026
1320	1389	GO:2000406	-0.026
1321	876	GO:0042326	-0.026
1322	79	GO:0000831	-0.026
1323	1013	GO:0045930	-0.026
1324	1097	GO:0050680	-0.026
1325	1056	GO:0047874	-0.026
1326	308	GO:0006915	-0.026
1327	117	GO:0001933	-0.026
1328	1386	GO:2000209	-0.026
1329	478	GO:0014807	-0.026
1330	116	GO:0001889	-0.026
1331	395	GO:0008418	-0.027
1332	775	GO:0033735	-0.027
1333	1111	GO:0051146	-0.027
1334	993	GO:0045736	-0.027
1335	397	GO:0008427	-0.027
1336	363	GO:0007440	-0.027
1337	1074	GO:0048589	-0.027
1338	939	GO:0043525	-0.027
1339	839	GO:0035594	-0.027
1340	918	GO:0043234	-0.027
1341	625	GO:0030309	-0.027
1342	150	GO:0003270	-0.028
1343	1357	GO:0090207	-0.028
1344	1101	GO:0050785	-0.028
1345	156	GO:0003682	-0.028
1346	1186	GO:0060091	-0.028
1347	1308	GO:0071466	-0.028
1348	1309	GO:0071479	-0.028
1349	299	GO:0006357	-0.028
1350	201	GO:0004765	-0.028
1351	320	GO:0007050	-0.028
1352	897	GO:0042998	-0.029
1353	833	GO:0035509	-0.029
1354	894	GO:0042984	-0.029
1355	1000	GO:0045786	-0.029
1356	549	GO:0017188	-0.029
1357	451	GO:0010627	-0.029
1358	1010	GO:0045892	-0.029
1359	1303	GO:0071363	-0.029
1360	172	GO:0003996	-0.029
1361	1435	hsa05223	-0.03
1362	510	GO:0016503	-0.03
1363	550	GO:0018009	-0.03
1364	399	GO:0008543	-0.03
1365	879	GO:0042424	-0.03
1366	953	GO:0043843	-0.03
1367	1058	GO:0048015	-0.03
1368	417	GO:0009239	-0.03
1369	882	GO:0042493	-0.03
1370	1187	GO:0060118	-0.031
1371	580	GO:0019901	-0.031
1372	1177	GO:0055107	-0.031
1373	944	GO:0043549	-0.031
1374	1422	hsa05210	-0.031
1375	459	GO:0010869	-0.031
1376	182	GO:0004483	-0.031
1377	658	GO:0031100	-0.031
1378	435	GO:0010332	-0.031
1379	475	GO:0014739	-0.031
1380	927	GO:0043378	-0.032
1381	1211	GO:0060537	-0.032
1382	1445	hsa05216	-0.032
1383	922	GO:0043269	-0.032
1384	1428	hsa05214	-0.032
1385	229	GO:0005550	-0.032
1386	1318	GO:0071800	-0.032
1387	174	GO:0004037	-0.033
1388	1426	hsa05213	-0.033
1389	1283	GO:0070773	-0.033
1390	403	GO:0008629	-0.033
1391	1197	GO:0060339	-0.033
1392	25	GO:0000122	-0.033
1393	1286	GO:0070869	-0.033
1394	1194	GO:0060262	-0.033
1395	997	GO:0045768	-0.033
1396	175	GO:0004057	-0.033
1397	874	GO:0042318	-0.034
1398	1441	hsa05200	-0.034
1399	527	GO:0016598	-0.034
1400	452	GO:0010629	-0.034
1401	1344	GO:0072600	-0.034
1402	1345	GO:0072674	-0.034
1403	845	GO:0035786	-0.034
1404	569	GO:0019236	-0.034
1405	571	GO:0019290	-0.035
1406	1341	GO:0072331	-0.035
1407	499	GO:0016229	-0.035
1408	407	GO:0008667	-0.035
1409	501	GO:0016250	-0.035
1410	1420	hsa05220	-0.035
1411	572	GO:0019605	-0.035
1412	1347	GO:0080009	-0.036
1413	1443	hsa05215	-0.036
1414	126	GO:0002121	-0.036
1415	574	GO:0019780	-0.036
1416	1439	hsa05212	-0.036
1417	1048	GO:0047196	-0.036
1418	1169	GO:0052746	-0.036
1419	376	GO:0008134	-0.036
1420	830	GO:0035499	-0.036
1421	410	GO:0009000	-0.037
1422	106	GO:0001701	-0.037
1423	557	GO:0018874	-0.037
1424	142	GO:0002932	-0.037
1425	1011	GO:0045893	-0.037
1426	1320	GO:0071862	-0.037
1427	477	GO:0014801	-0.037
1428	1418	hsa05219	-0.037
1429	867	GO:0042073	-0.037
1430	1430	hsa05166	-0.038
1431	480	GO:0015019	-0.038
1432	556	GO:0018455	-0.038
1433	502	GO:0016269	-0.038
1434	559	GO:0019028	-0.038
1435	854	GO:0036031	-0.038
1436	409	GO:0008903	-0.038
1437	1431	hsa05218	-0.038
1438	960	GO:0044356	-0.039
1439	964	GO:0044433	-0.039
1440	189	GO:0004640	-0.039
1441	1061	GO:0048146	-0.039
1442	902	GO:0043066	-0.039
1443	868	GO:0042127	-0.04
1444	901	GO:0043065	-0.04
1445	388	GO:0008285	-0.041

## Sheet: Dateset3 MaxRel Table
Order	Feature	Name	Score
1	234	GO:0003918	0.035
2	1856	GO:0070683	0.033
3	942	GO:0031301	0.033
4	438	GO:0006974	0.033
5	1469	GO:0045875	0.032
6	1164	GO:0035173	0.031
7	1846	GO:0070512	0.031
8	281	GO:0005072	0.031
9	2040	GO:2000620	0.031
10	955	GO:0031436	0.031
11	2039	GO:2000617	0.031
12	1476	GO:0045943	0.031
13	405	GO:0006359	0.031
14	1957	GO:0085020	0.029
15	2077	hsa04110	0.029
16	1879	GO:0071168	0.029
17	1392	GO:0045120	0.028
18	1588	GO:0048733	0.028
19	91	GO:0000915	0.028
20	471	GO:0007108	0.028
21	1688	GO:0051726	0.028
22	1767	GO:0060564	0.027
23	1503	GO:0046632	0.027
24	1496	GO:0046600	0.027
25	531	GO:0008283	0.027
26	628	GO:0010767	0.027
27	1430	GO:0045624	0.027
28	2038	GO:2000615	0.027
29	928	GO:0031065	0.027
30	453	GO:0007062	0.027
31	564	GO:0009048	0.026
32	232	GO:0003916	0.026
33	971	GO:0031572	0.026
34	50	GO:0000380	0.026
35	1566	GO:0048478	0.026
36	1679	GO:0051574	0.026
37	1775	GO:0060623	0.026
38	1889	GO:0071283	0.026
39	1706	GO:0051987	0.026
40	1509	GO:0046680	0.026
41	1194	GO:0035520	0.026
42	313	GO:0005634	0.026
43	88	GO:0000819	0.026
44	789	GO:0019899	0.025
45	20	GO:0000085	0.025
46	822	GO:0021873	0.025
47	1923	GO:0071930	0.025
48	474	GO:0007127	0.025
49	260	GO:0004677	0.024
50	15	GO:0000079	0.024
51	1133	GO:0034509	0.024
52	1166	GO:0035189	0.024
53	1874	GO:0071107	0.024
54	1441	GO:0045682	0.024
55	73	GO:0000780	0.024
56	1218	GO:0036071	0.024
57	1301	GO:0043112	0.024
58	544	GO:0008424	0.024
59	1523	GO:0046921	0.024
60	1092	GO:0033578	0.024
61	571	GO:0009330	0.024
62	375	GO:0006268	0.024
63	767	GO:0019035	0.024
64	1468	GO:0045870	0.024
65	520	GO:0008156	0.024
66	1897	GO:0071398	0.024
67	1344	GO:0043517	0.023
68	2007	GO:2000045	0.023
69	473	GO:0007126	0.023
70	18	GO:0000083	0.023
71	874	GO:0030261	0.023
72	2005	GO:2000036	0.023
73	65	GO:0000724	0.022
74	1399	GO:0045143	0.022
75	731	GO:0016799	0.022
76	702	GO:0016363	0.022
77	1677	GO:0051571	0.022
78	1654	GO:0051276	0.022
79	1458	GO:0045786	0.022
80	386	GO:0006301	0.022
81	895	GO:0030512	0.022
82	86	GO:0000806	0.022
83	85	GO:0000805	0.022
84	1498	GO:0046602	0.022
85	469	GO:0007098	0.022
86	1574	GO:0048638	0.022
87	379	GO:0006281	0.022
88	1262	GO:0042555	0.022
89	1660	GO:0051310	0.022
90	17	GO:0000082	0.022
91	1834	GO:0070314	0.021
92	600	GO:0010389	0.021
93	380	GO:0006282	0.021
94	979	GO:0031619	0.021
95	1094	GO:0033593	0.021
96	14	GO:0000077	0.021
97	1201	GO:0035624	0.021
98	5	GO:0000022	0.021
99	378	GO:0006275	0.021
100	373	GO:0006265	0.021
101	2051	GO:2000773	0.021
102	1297	GO:0043085	0.021
103	1739	GO:0060236	0.021
104	1991	GO:0097149	0.021
105	1284	GO:0042992	0.021
106	296	GO:0005515	0.021
107	1072	GO:0033148	0.021
108	659	GO:0014013	0.021
109	1427	GO:0045605	0.021
110	238	GO:0004003	0.021
111	728	GO:0016604	0.021
112	1308	GO:0043148	0.021
113	606	GO:0010484	0.021
114	1615	GO:0050681	0.021
115	1224	GO:0040001	0.021
116	371	GO:0006260	0.021
117	1789	GO:0060743	0.021
118	1156	GO:0035065	0.021
119	107	GO:0001047	0.021
120	1071	GO:0033145	0.021
121	16	GO:0000080	0.02
122	370	GO:0006259	0.02
123	12	GO:0000075	0.02
124	60	GO:0000701	0.02
125	1364	GO:0043626	0.02
126	998	GO:0032077	0.02
127	465	GO:0007093	0.02
128	929	GO:0031081	0.02
129	1969	GO:0090166	0.02
130	37	GO:0000216	0.02
131	1321	GO:0043254	0.02
132	1729	GO:0060068	0.02
133	812	GO:0021695	0.02
134	1105	GO:0033673	0.02
135	1112	GO:0033993	0.02
136	463	GO:0007091	0.02
137	2102	hsa05222	0.02
138	80	GO:0000793	0.02
139	95	GO:0000942	0.02
140	64	GO:0000723	0.02
141	1020	GO:0032298	0.02
142	1026	GO:0032357	0.02
143	1028	GO:0032405	0.02
144	1005	GO:0032142	0.02
145	111	GO:0001102	0.02
146	607	GO:0010485	0.02
147	447	GO:0007049	0.019
148	796	GO:0019985	0.019
149	398	GO:0006344	0.019
150	318	GO:0005657	0.019
151	1719	GO:0055105	0.019
152	569	GO:0009294	0.019
153	712	GO:0016538	0.019
154	1081	GO:0033261	0.019
155	81	GO:0000794	0.019
156	530	GO:0008278	0.019
157	734	GO:0016851	0.019
158	93	GO:0000939	0.019
159	687	GO:0015995	0.019
160	686	GO:0015979	0.019
161	19	GO:0000084	0.019
162	466	GO:0007094	0.019
163	1796	GO:0060761	0.019
164	779	GO:0019724	0.019
165	467	GO:0007095	0.019
166	580	GO:0009912	0.019
167	662	GO:0014044	0.019
168	2041	GO:2000648	0.019
169	376	GO:0006270	0.019
170	92	GO:0000922	0.019
171	82	GO:0000796	0.019
172	10	GO:0000070	0.019
173	1659	GO:0051301	0.019
174	42	GO:0000278	0.019
175	156	GO:0002009	0.019
176	825	GO:0021889	0.019
177	1561	GO:0048333	0.019
178	1467	GO:0045862	0.019
179	77	GO:0000785	0.018
180	1570	GO:0048589	0.018
181	1004	GO:0032139	0.018
182	1115	GO:0034088	0.018
183	1878	GO:0071158	0.018
184	519	GO:0008134	0.018
185	68	GO:0000733	0.018
186	69	GO:0000739	0.018
187	1560	GO:0048332	0.018
188	61	GO:0000710	0.018
189	875	GO:0030263	0.018
190	1021	GO:0032301	0.018
191	1657	GO:0051298	0.018
192	1006	GO:0032143	0.018
193	1648	GO:0051225	0.018
194	137	GO:0001833	0.018
195	1250	GO:0042415	0.018
196	663	GO:0014067	0.018
197	2006	GO:2000042	0.018
198	1082	GO:0033262	0.018
199	846	GO:0030056	0.018
200	382	GO:0006287	0.018
201	2017	GO:2000145	0.018
202	720	GO:0016575	0.018
203	246	GO:0004407	0.018
204	611	GO:0010559	0.018
205	392	GO:0006312	0.018
206	362	GO:0006044	0.018
207	774	GO:0019237	0.018
208	1165	GO:0035174	0.018
209	143	GO:0001889	0.018
210	1184	GO:0035404	0.018
211	84	GO:0000800	0.018
212	1464	GO:0045842	0.018
213	1192	GO:0035518	0.018
214	1843	GO:0070463	0.018
215	827	GO:0021897	0.018
216	1034	GO:0032463	0.018
217	1442	GO:0045685	0.018
218	120	GO:0001655	0.018
219	455	GO:0007064	0.018
220	1470	GO:0045892	0.018
221	1150	GO:0035021	0.018
222	1073	GO:0033153	0.018
223	888	GO:0030337	0.018
224	1114	GO:0034080	0.018
225	348	GO:0005828	0.018
226	1802	GO:0060789	0.018
227	1817	GO:0065004	0.018
228	94	GO:0000940	0.017
229	322	GO:0005664	0.017
230	71	GO:0000778	0.017
231	1656	GO:0051292	0.017
232	1142	GO:0034722	0.017
233	40	GO:0000228	0.017
234	456	GO:0007067	0.017
235	70	GO:0000775	0.017
236	1457	GO:0045769	0.017
237	452	GO:0007059	0.017
238	1685	GO:0051661	0.017
239	1906	GO:0071559	0.017
240	892	GO:0030496	0.017
241	1027	GO:0032403	0.017
242	1098	GO:0033600	0.017
243	1229	GO:0040038	0.017
244	1480	GO:0045955	0.017
245	862	GO:0030174	0.017
246	221	GO:0003713	0.017
247	1089	GO:0033558	0.017
248	247	GO:0004468	0.017
249	1521	GO:0046903	0.017
250	214	GO:0003689	0.017
251	552	GO:0008608	0.017
252	1735	GO:0060209	0.017
253	1226	GO:0040016	0.017
254	105	GO:0001042	0.017
255	1851	GO:0070557	0.017
256	490	GO:0007346	0.017
257	654	GO:0010997	0.017
258	1152	GO:0035035	0.017
259	1478	GO:0045945	0.017
260	1690	GO:0051782	0.017
261	1155	GO:0035064	0.017
262	387	GO:0006302	0.017
263	483	GO:0007219	0.017
264	1514	GO:0046785	0.017
265	899	GO:0030616	0.017
266	885	GO:0030332	0.017
267	106	GO:0001046	0.017
268	97	GO:0000978	0.017
269	1652	GO:0051271	0.017
270	1333	GO:0043398	0.017
271	321	GO:0005663	0.017
272	377	GO:0006271	0.017
273	527	GO:0008262	0.017
274	2082	hsa03030	0.017
275	940	GO:0031297	0.016
276	1959	GO:0090003	0.016
277	390	GO:0006310	0.016
278	163	GO:0002072	0.016
279	233	GO:0003917	0.016
280	1057	GO:0032909	0.016
281	1063	GO:0032993	0.016
282	317	GO:0005654	0.016
283	1563	GO:0048386	0.016
284	1359	GO:0043596	0.016
285	1448	GO:0045726	0.016
286	449	GO:0007051	0.016
287	439	GO:0006975	0.016
288	1067	GO:0033088	0.016
289	1773	GO:0060598	0.016
290	1805	GO:0060931	0.016
291	196	GO:0003167	0.016
292	1734	GO:0060177	0.016
293	1306	GO:0043140	0.016
294	440	GO:0006978	0.016
295	1539	GO:0047485	0.016
296	935	GO:0031116	0.016
297	549	GO:0008574	0.016
298	515	GO:0008054	0.016
299	1367	GO:0043697	0.016
300	1176	GO:0035312	0.016
301	1701	GO:0051908	0.016
302	87	GO:0000808	0.016
303	1400	GO:0045145	0.016
304	1179	GO:0035330	0.016
305	1858	GO:0070734	0.016
306	717	GO:0016572	0.016
307	1113	GO:0034056	0.016
308	62	GO:0000712	0.016
309	1317	GO:0043220	0.016
310	1747	GO:0060318	0.016
311	101	GO:0000987	0.016
312	255	GO:0004572	0.016
313	1167	GO:0035196	0.016
314	905	GO:0030660	0.016
315	326	GO:0005694	0.016
316	722	GO:0016581	0.016
317	372	GO:0006261	0.016
318	1717	GO:0055096	0.016
319	2032	GO:2000481	0.016
320	461	GO:0007089	0.016
321	1536	GO:0047293	0.016
322	165	GO:0002083	0.016
323	1926	GO:0072044	0.016
324	1336	GO:0043409	0.016
325	1283	GO:0042985	0.016
326	1182	GO:0035371	0.016
327	1054	GO:0032876	0.015
328	641	GO:0010870	0.015
329	1090	GO:0033561	0.015
330	1434	GO:0045656	0.015
331	1288	GO:0043009	0.015
332	56	GO:0000422	0.015
333	1872	GO:0071062	0.015
334	157	GO:0002011	0.015
335	1939	GO:0072300	0.015
336	1103	GO:0033629	0.015
337	696	GO:0016242	0.015
338	1770	GO:0060574	0.015
339	1261	GO:0042552	0.015
340	1528	GO:0046969	0.015
341	743	GO:0017053	0.015
342	460	GO:0007088	0.015
343	1931	GO:0072144	0.015
344	1671	GO:0051444	0.015
345	1015	GO:0032232	0.015
346	78	GO:0000790	0.015
347	1023	GO:0032318	0.015
348	1031	GO:0032436	0.015
349	1833	GO:0070306	0.015
350	113	GO:0001106	0.015
351	288	GO:0005178	0.015
352	1472	GO:0045910	0.015
353	245	GO:0004386	0.015
354	941	GO:0031298	0.015
355	1396	GO:0045128	0.015
356	1277	GO:0042826	0.015
357	170	GO:0002204	0.015
358	391	GO:0006311	0.015
359	1684	GO:0051649	0.015
360	1606	GO:0048878	0.015
361	2001	GO:1900218	0.015
362	374	GO:0006266	0.015
363	2035	GO:2000594	0.015
364	1238	GO:0042162	0.015
365	1999	GO:1900212	0.015
366	1222	GO:0039003	0.015
367	835	GO:0022027	0.015
368	1940	GO:0072305	0.015
369	2000	GO:1900215	0.015
370	1678	GO:0051573	0.015
371	1403	GO:0045178	0.015
372	1922	GO:0071922	0.015
373	1586	GO:0048729	0.015
374	622	GO:0010694	0.015
375	1013	GO:0032204	0.015
376	763	GO:0018393	0.015
377	1661	GO:0051322	0.015
378	685	GO:0015964	0.015
379	1540	GO:0047710	0.015
380	898	GO:0030540	0.015
381	351	GO:0005873	0.015
382	1497	GO:0046601	0.015
383	458	GO:0007079	0.015
384	617	GO:0010626	0.015
385	476	GO:0007141	0.015
386	988	GO:0031798	0.015
387	1220	GO:0038052	0.015
388	880	GO:0030308	0.015
389	1808	GO:0061029	0.015
390	1902	GO:0071459	0.015
391	431	GO:0006922	0.015
392	1547	GO:0048102	0.015
393	166	GO:0002102	0.015
394	21	GO:0000087	0.015
395	2065	GO:2001038	0.015
396	714	GO:0016568	0.015
397	592	GO:0010212	0.015
398	1524	GO:0046929	0.015
399	772	GO:0019211	0.014
400	216	GO:0003691	0.014
401	1432	GO:0045646	0.014
402	897	GO:0030521	0.014
403	502	GO:0007507	0.014
404	1001	GO:0032095	0.014
405	74	GO:0000781	0.014
406	1158	GO:0035098	0.014
407	510	GO:0008035	0.014
408	715	GO:0016570	0.014
409	2071	GO:2001241	0.014
410	1960	GO:0090007	0.014
411	2069	GO:2001220	0.014
412	1239	GO:0042176	0.014
413	837	GO:0022408	0.014
414	1964	GO:0090096	0.014
415	1379	GO:0044346	0.014
416	1929	GO:0072134	0.014
417	1332	GO:0043393	0.014
418	737	GO:0016922	0.014
419	920	GO:0030951	0.014
420	1614	GO:0050680	0.014
421	1033	GO:0032461	0.014
422	1168	GO:0035234	0.014
423	823	GO:0021877	0.014
424	1569	GO:0048565	0.014
425	2002	GO:1900625	0.014
426	503	GO:0007569	0.014
427	1631	GO:0050902	0.014
428	939	GO:0031262	0.014
429	27	GO:0000132	0.014
430	286	GO:0005173	0.014
431	1620	GO:0050773	0.014
432	528	GO:0008270	0.014
433	117	GO:0001556	0.014
434	1801	GO:0060770	0.014
435	1086	GO:0033484	0.014
436	1079	GO:0033205	0.014
437	230	GO:0003887	0.014
438	1909	GO:0071732	0.014
439	1294	GO:0043066	0.014
440	915	GO:0030857	0.014
441	2095	hsa04114	0.014
442	729	GO:0016605	0.014
443	1651	GO:0051256	0.014
444	22	GO:0000088	0.014
445	870	GO:0030221	0.014
446	572	GO:0009411	0.014
447	1722	GO:0060020	0.014
448	194	GO:0003131	0.014
449	962	GO:0031507	0.014
450	923	GO:0031052	0.014
451	224	GO:0003777	0.014
452	1213	GO:0035978	0.014
453	1216	GO:0035987	0.014
454	2064	GO:2001033	0.014
455	310	GO:0005608	0.014
456	2045	GO:2000685	0.014
457	1190	GO:0035500	0.014
458	1191	GO:0035501	0.014
459	567	GO:0009263	0.014
460	1752	GO:0060379	0.014
461	269	GO:0004748	0.014
462	1947	GO:0072428	0.014
463	958	GO:0031490	0.014
464	1315	GO:0043208	0.014
465	1650	GO:0051247	0.014
466	319	GO:0005658	0.014
467	395	GO:0006335	0.014
468	770	GO:0019102	0.014
469	1761	GO:0060520	0.014
470	1871	GO:0070974	0.014
471	877	GO:0030284	0.014
472	1447	GO:0045720	0.014
473	1350	GO:0043539	0.014
474	1764	GO:0060528	0.014
475	2062	GO:2001022	0.014
476	1829	GO:0070254	0.014
477	1237	GO:0042159	0.013
478	1774	GO:0060599	0.013
479	1757	GO:0060433	0.013
480	1978	GO:0090307	0.013
481	814	GO:0021761	0.013
482	1768	GO:0060565	0.013
483	451	GO:0007057	0.013
484	263	GO:0004712	0.013
485	593	GO:0010216	0.013
486	1419	GO:0045502	0.013
487	693	GO:0016202	0.013
488	1102	GO:0033627	0.013
489	1670	GO:0051443	0.013
490	1129	GO:0034451	0.013
491	346	GO:0005815	0.013
492	719	GO:0016574	0.013
493	1944	GO:0072362	0.013
494	2018	GO:2000191	0.013
495	1718	GO:0055100	0.013
496	1384	GO:0044539	0.013
497	1633	GO:0051010	0.013
498	1985	GO:0090403	0.013
499	53	GO:0000404	0.013
500	54	GO:0000405	0.013
501	1311	GO:0043161	0.013
502	890	GO:0030422	0.013
503	83	GO:0000797	0.013
504	1376	GO:0044314	0.013
505	1658	GO:0051299	0.013
506	457	GO:0007076	0.013
507	287	GO:0005176	0.013
508	1185	GO:0035407	0.013
509	957	GO:0031442	0.013
510	1183	GO:0035402	0.013
511	1548	GO:0048103	0.013
512	485	GO:0007221	0.013
513	1345	GO:0043518	0.013
514	1463	GO:0045839	0.013
515	900	GO:0030617	0.013
516	1662	GO:0051329	0.013
517	1705	GO:0051984	0.013
518	297	GO:0005518	0.013
519	965	GO:0031523	0.013
520	1583	GO:0048713	0.013
521	1867	GO:0070933	0.013
522	1019	GO:0032290	0.013
523	1892	GO:0071335	0.013
524	1946	GO:0072368	0.013
525	1299	GO:0043089	0.013
526	1873	GO:0071065	0.013
527	1935	GO:0072189	0.013
528	1022	GO:0032302	0.013
529	55	GO:0000406	0.013
530	1009	GO:0032181	0.013
531	2094	hsa04330	0.013
532	1060	GO:0032943	0.013
533	1696	GO:0051880	0.013
534	1003	GO:0032137	0.013
535	1248	GO:0042393	0.013
536	791	GO:0019901	0.013
537	114	GO:0001300	0.013
538	1444	GO:0045713	0.013
539	277	GO:0004955	0.013
540	1783	GO:0060694	0.013
541	2052	GO:2000774	0.013
542	1546	GO:0048096	0.013
543	604	GO:0010468	0.013
544	462	GO:0007090	0.013
545	187	GO:0002763	0.013
546	180	GO:0002576	0.013
547	624	GO:0010719	0.013
548	1281	GO:0042981	0.013
549	1700	GO:0051901	0.013
550	450	GO:0007052	0.013
551	1402	GO:0045175	0.013
552	1043	GO:0032794	0.013
553	1928	GO:0072133	0.013
554	2059	GO:2000811	0.013
555	256	GO:0004659	0.013
556	1193	GO:0035519	0.013
557	1638	GO:0051096	0.013
558	1982	GO:0090399	0.013
559	576	GO:0009791	0.013
560	1936	GO:0072221	0.013
561	1824	GO:0070173	0.013
562	589	GO:0010070	0.013
563	1249	GO:0042405	0.013
564	171	GO:0002244	0.013
565	536	GO:0008340	0.013
566	278	GO:0005006	0.013
567	1307	GO:0043142	0.013
568	707	GO:0016480	0.013
569	1937	GO:0072278	0.013
570	1963	GO:0090074	0.013
571	499	GO:0007497	0.013
572	1724	GO:0060044	0.012
573	498	GO:0007440	0.012
574	667	GO:0014807	0.012
575	1816	GO:0061419	0.012
576	1908	GO:0071681	0.012
577	201	GO:0003264	0.012
578	798	GO:0021515	0.012
579	202	GO:0003270	0.012
580	195	GO:0003160	0.012
581	1799	GO:0060766	0.012
582	626	GO:0010742	0.012
583	2030	GO:2000467	0.012
584	718	GO:0016573	0.012
585	1096	GO:0033596	0.012
586	1264	GO:0042583	0.012
587	2107	hsa04120	0.012
588	501	GO:0007501	0.012
589	211	GO:0003682	0.012
590	323	GO:0005667	0.012
591	241	GO:0004146	0.012
592	703	GO:0016446	0.012
593	1864	GO:0070887	0.012
594	1295	GO:0043067	0.012
595	1886	GO:0071258	0.012
596	2036	GO:2000597	0.012
597	1809	GO:0061044	0.012
598	855	GO:0030127	0.012
599	1815	GO:0061360	0.012
600	809	GO:0021650	0.012
601	808	GO:0021633	0.012
602	1187	GO:0035491	0.012
603	1703	GO:0051974	0.012
604	402	GO:0006353	0.012
605	459	GO:0007080	0.012
606	1383	GO:0044464	0.012
607	3	GO:0000018	0.012
608	1062	GO:0032976	0.012
609	616	GO:0010625	0.012
610	1507	GO:0046674	0.012
611	335	GO:0005757	0.012
612	1681	GO:0051580	0.012
613	1664	GO:0051382	0.012
614	1132	GO:0034501	0.012
615	1731	GO:0060123	0.012
616	1875	GO:0071141	0.012
617	570	GO:0009314	0.012
618	1446	GO:0045717	0.012
619	1236	GO:0042127	0.012
620	1779	GO:0060669	0.012
621	1363	GO:0043620	0.012
622	1625	GO:0050820	0.012
623	1930	GO:0072138	0.012
624	1412	GO:0045347	0.012
625	1404	GO:0045180	0.012
626	1516	GO:0046826	0.012
627	873	GO:0030235	0.012
628	1234	GO:0042063	0.012
629	517	GO:0008089	0.012
630	1790	GO:0060744	0.012
631	2025	GO:2000377	0.012
632	276	GO:0004882	0.012
633	931	GO:0031098	0.012
634	1324	GO:0043259	0.012
635	1880	GO:0071173	0.012
636	412	GO:0006513	0.012
637	404	GO:0006357	0.012
638	47	GO:0000307	0.012
639	1785	GO:0060710	0.012
640	1629	GO:0050872	0.012
641	666	GO:0014740	0.012
642	1611	GO:0050544	0.012
643	590	GO:0010159	0.012
644	984	GO:0031648	0.012
645	1693	GO:0051797	0.012
646	1356	GO:0043570	0.012
647	1584	GO:0048714	0.012
648	1304	GO:0043130	0.012
649	1938	GO:0072284	0.012
650	464	GO:0007092	0.012
651	546	GO:0008475	0.012
652	495	GO:0007406	0.012
653	1645	GO:0051154	0.012
654	972	GO:0031573	0.012
655	1047	GO:0032803	0.012
656	752	GO:0017176	0.012
657	740	GO:0016971	0.012
658	177	GO:0002495	0.012
659	739	GO:0016938	0.012
660	72	GO:0000779	0.012
661	625	GO:0010724	0.012
662	2092	hsa03450	0.012
663	1008	GO:0032154	0.012
664	1912	GO:0071778	0.012
665	1587	GO:0048730	0.012
666	612	GO:0010569	0.012
667	154	GO:0001953	0.012
668	1531	GO:0046985	0.012
669	267	GO:0004721	0.012
670	878	GO:0030301	0.012
671	24	GO:0000090	0.012
672	240	GO:0004137	0.012
673	525	GO:0008238	0.012
674	1485	GO:0046092	0.012
675	653	GO:0010994	0.012
676	1040	GO:0032548	0.012
677	558	GO:0008637	0.012
678	736	GO:0016891	0.012
679	1381	GO:0044428	0.012
680	591	GO:0010165	0.012
681	1787	GO:0060740	0.012
682	1491	GO:0046426	0.012
683	1925	GO:0072017	0.012
684	1316	GO:0043219	0.012
685	197	GO:0003180	0.012
686	1798	GO:0060765	0.012
687	1097	GO:0033598	0.012
688	110	GO:0001085	0.012
689	169	GO:0002193	0.012
690	1290	GO:0043015	0.012
691	1488	GO:0046332	0.012
692	1866	GO:0070932	0.012
693	190	GO:0002904	0.011
694	1981	GO:0090398	0.011
695	1573	GO:0048608	0.011
696	1644	GO:0051152	0.011
697	1794	GO:0060750	0.011
698	127	GO:0001739	0.011
699	1577	GO:0048665	0.011
700	1438	GO:0045665	0.011
701	1961	GO:0090051	0.011
702	1948	GO:0072563	0.011
703	744	GO:0017055	0.011
704	675	GO:0015630	0.011
705	1123	GO:0034389	0.011
706	1099	GO:0033601	0.011
707	1958	GO:0085029	0.011
708	1934	GO:0072179	0.011
709	1763	GO:0060527	0.011
710	2068	GO:2001141	0.011
711	1580	GO:0048709	0.011
712	1030	GO:0032422	0.011
713	921	GO:0030953	0.011
714	347	GO:0005819	0.011
715	1360	GO:0043610	0.011
716	1842	GO:0070438	0.011
717	364	GO:0006109	0.011
718	1052	GO:0032869	0.011
719	1602	GO:0048859	0.011
720	497	GO:0007422	0.011
721	301	GO:0005577	0.011
722	1604	GO:0048870	0.011
723	533	GO:0008285	0.011
724	560	GO:0008821	0.011
725	350	GO:0005871	0.011
726	1119	GO:0034190	0.011
727	701	GO:0016324	0.011
728	1855	GO:0070668	0.011
729	1007	GO:0032147	0.011
730	1910	GO:0071733	0.011
731	1707	GO:0051988	0.011
732	357	GO:0005971	0.011
733	961	GO:0031497	0.011
734	1672	GO:0051488	0.011
735	1976	GO:0090267	0.011
736	1077	GO:0033186	0.011
737	292	GO:0005488	0.011
738	1252	GO:0042471	0.011
739	566	GO:0009186	0.011
740	13	GO:0000076	0.011
741	2022	GO:2000342	0.011
742	1181	GO:0035359	0.011
743	909	GO:0030690	0.011
744	978	GO:0031616	0.011
745	1414	GO:0045444	0.011
746	1355	GO:0043566	0.011
747	550	GO:0008595	0.011
748	1257	GO:0042518	0.011
749	596	GO:0010248	0.011
750	655	GO:0012501	0.011
751	568	GO:0009267	0.011
752	1550	GO:0048146	0.011
753	554	GO:0008630	0.011
754	859	GO:0030140	0.011
755	1680	GO:0051575	0.011
756	448	GO:0007050	0.011
757	1510	GO:0046683	0.011
758	1812	GO:0061198	0.011
759	1337	GO:0043422	0.011
760	945	GO:0031324	0.011
761	1827	GO:0070215	0.011
762	671	GO:0015149	0.011
763	912	GO:0030844	0.011
764	1601	GO:0048858	0.011
765	454	GO:0007063	0.011
766	602	GO:0010452	0.011
767	1186	GO:0035428	0.011
768	1639	GO:0051097	0.011
769	623	GO:0010718	0.011
770	1997	GO:1900116	0.011
771	1366	GO:0043653	0.011
772	647	GO:0010952	0.011
773	1543	GO:0048019	0.011
774	660	GO:0014037	0.011
775	1905	GO:0071535	0.011
776	959	GO:0031492	0.011
777	178	GO:0002520	0.011
778	102	GO:0000988	0.011
779	125	GO:0001701	0.011
780	1979	GO:0090343	0.011
781	1692	GO:0051788	0.011
782	334	GO:0005741	0.011
783	1988	GO:0097039	0.011
784	1913	GO:0071797	0.011
785	1994	GO:0097225	0.011
786	1505	GO:0046661	0.011
787	1219	GO:0038028	0.011
788	1741	GO:0060253	0.011
789	1738	GO:0060218	0.011
790	1831	GO:0070295	0.011
791	588	GO:0010046	0.011
792	704	GO:0016447	0.011
793	1276	GO:0042802	0.011
794	581	GO:0009913	0.011
795	1289	GO:0043014	0.011
796	705	GO:0016458	0.011
797	129	GO:0001763	0.011
798	1890	GO:0071285	0.011
799	63	GO:0000722	0.011
800	680	GO:0015755	0.011
801	109	GO:0001078	0.011
802	995	GO:0031988	0.011
803	1686	GO:0051668	0.011
804	1835	GO:0070317	0.011
805	1116	GO:0034098	0.011
806	679	GO:0015739	0.011
807	670	GO:0015136	0.011
808	2089	hsa05166	0.011
809	2098	hsa05200	0.011
810	1437	GO:0045664	0.011
811	1136	GO:0034644	0.011
812	1175	GO:0035308	0.011
813	367	GO:0006226	0.011
814	242	GO:0004170	0.011
815	1484	GO:0046080	0.011
816	2088	hsa03440	0.011
817	401	GO:0006351	0.011
818	4	GO:0000019	0.011
819	1068	GO:0033128	0.011
820	2091	hsa03430	0.011
821	933	GO:0031102	0.011
822	1154	GO:0035051	0.011
823	999	GO:0032091	0.011
824	1876	GO:0071156	0.011
825	658	GO:0014010	0.011
826	1223	GO:0039535	0.011
827	193	GO:0003062	0.011
828	222	GO:0003714	0.011
829	811	GO:0021666	0.011
830	1048	GO:0032810	0.011
831	1830	GO:0070266	0.011
832	810	GO:0021660	0.011
833	2012	GO:2000116	0.011
834	477	GO:0007144	0.01
835	2055	GO:2000781	0.01
836	2053	GO:2000779	0.01
837	1044	GO:0032799	0.01
838	1046	GO:0032802	0.01
839	541	GO:0008413	0.01
840	683	GO:0015923	0.01
841	1195	GO:0035539	0.01
842	918	GO:0030892	0.01
843	366	GO:0006203	0.01
844	1828	GO:0070245	0.01
845	848	GO:0030097	0.01
846	204	GO:0003289	0.01
847	601	GO:0010421	0.01
848	521	GO:0008160	0.01
849	1352	GO:0043550	0.01
850	1592	GO:0048793	0.01
851	207	GO:0003334	0.01
852	2096	hsa04115	0.01
853	843	GO:0023035	0.01
854	1920	GO:0071899	0.01
855	1230	GO:0042054	0.01
856	725	GO:0016589	0.01
857	1032	GO:0032444	0.01
858	545	GO:0008432	0.01
859	1841	GO:0070412	0.01
860	668	GO:0014912	0.01
861	1045	GO:0032801	0.01
862	1675	GO:0051534	0.01
863	969	GO:0031536	0.01
864	507	GO:0008013	0.01
865	1665	GO:0051388	0.01
866	762	GO:0018205	0.01
867	145	GO:0001892	0.01
868	1254	GO:0042487	0.01
869	2078	hsa05220	0.01
870	1564	GO:0048471	0.01
871	1640	GO:0051098	0.01
872	209	GO:0003678	0.01
873	124	GO:0001673	0.01
874	1740	GO:0060252	0.01
875	26	GO:0000122	0.01
876	750	GO:0017145	0.01
877	1848	GO:0070531	0.01
878	1616	GO:0050688	0.01
879	1256	GO:0042493	0.01
880	1810	GO:0061045	0.01
881	786	GO:0019865	0.01
882	661	GO:0014040	0.01
883	200	GO:0003219	0.01
884	403	GO:0006355	0.01
885	168	GO:0002162	0.01
886	1901	GO:0071456	0.01
887	896	GO:0030520	0.01
888	932	GO:0031100	0.01
889	75	GO:0000783	0.01
890	782	GO:0019827	0.01
891	1609	GO:0050431	0.01
892	836	GO:0022037	0.01
893	1551	GO:0048147	0.01
894	1406	GO:0045197	0.01
895	603	GO:0010458	0.01
896	365	GO:0006123	0.01
897	1011	GO:0032201	0.01
898	1439	GO:0045668	0.01
899	1746	GO:0060317	0.01
900	1881	GO:0071174	0.01
901	164	GO:0002080	0.01
902	1233	GO:0042060	0.01
903	849	GO:0030098	0.01
904	1483	GO:0046078	0.01
905	231	GO:0003906	0.01
906	479	GO:0007160	0.01
907	272	GO:0004799	0.01
908	1984	GO:0090402	0.01
909	368	GO:0006231	0.01
910	565	GO:0009157	0.01
911	769	GO:0019088	0.01
912	1987	GO:0097021	0.01
913	1811	GO:0061146	0.01
914	1214	GO:0035985	0.01
915	1215	GO:0035986	0.01
916	652	GO:0010991	0.01
917	1002	GO:0032133	0.01
918	1554	GO:0048227	0.01
919	974	GO:0031576	0.01
920	562	GO:0009008	0.01
921	1781	GO:0060687	0.01
922	832	GO:0021987	0.01
923	189	GO:0002821	0.01
924	887	GO:0030336	0.01
925	1388	GO:0045069	0.01
926	1603	GO:0048863	0.01
927	1428	GO:0045616	0.01
928	807	GO:0021612	0.01
929	1061	GO:0032967	0.01
930	1655	GO:0051280	0.01
931	1891	GO:0071310	0.01
932	917	GO:0030879	0.01
933	605	GO:0010469	0.01
934	556	GO:0008634	0.01
935	1941	GO:0072307	0.01
936	2100	hsa04914	0.01
937	136	GO:0001832	0.01
938	1904	GO:0071480	0.01
939	446	GO:0007044	0.01
940	425	GO:0006909	0.01
941	1723	GO:0060039	0.01
942	1207	GO:0035799	0.01
943	1342	GO:0043497	0.01
944	1258	GO:0042524	0.01
945	790	GO:0019900	0.01
946	1766	GO:0060547	0.01
947	963	GO:0031508	0.01
948	1322	GO:0043256	0.01
949	2024	GO:2000373	0.01
950	757	GO:0018023	0.01
951	1325	GO:0043260	0.01
952	1699	GO:0051895	0.01
953	1135	GO:0034616	0.009
954	1380	GO:0044419	0.009
955	1365	GO:0043627	0.009
956	1273	GO:0042771	0.009
957	1818	GO:0070022	0.009
958	508	GO:0008022	0.009
959	159	GO:0002039	0.009
960	1822	GO:0070087	0.009
961	1869	GO:0070969	0.009
962	633	GO:0010821	0.009
963	621	GO:0010669	0.009
964	1170	GO:0035259	0.009
965	1107	GO:0033690	0.009
966	1473	GO:0045918	0.009
967	44	GO:0000293	0.009
968	1526	GO:0046947	0.009
969	818	GO:0021799	0.009
970	1666	GO:0051400	0.009
971	631	GO:0010804	0.009
972	1298	GO:0043086	0.009
973	217	GO:0003696	0.009
974	332	GO:0005726	0.009
975	429	GO:0006919	0.009
976	1178	GO:0035329	0.009
977	1571	GO:0048592	0.009
978	1420	GO:0045541	0.009
979	845	GO:0030030	0.009
980	1246	GO:0042325	0.009
981	1628	GO:0050849	0.009
982	1585	GO:0048715	0.009
983	1649	GO:0051233	0.009
984	1683	GO:0051635	0.009
985	76	GO:0000784	0.009
986	1389	GO:0045103	0.009
987	1479	GO:0045950	0.009
988	1433	GO:0045648	0.009
989	1899	GO:0071449	0.009
990	1313	GO:0043175	0.009
991	226	GO:0003839	0.009
992	578	GO:0009893	0.009
993	821	GO:0021858	0.009
994	309	GO:0005607	0.009
995	38	GO:0000224	0.009
996	103	GO:0001010	0.009
997	304	GO:0005586	0.009
998	1945	GO:0072365	0.009
999	1085	GO:0033314	0.009
1000	1292	GO:0043035	0.009
1001	927	GO:0031060	0.009
1002	236	GO:0003953	0.009
1003	1369	GO:0043966	0.009
1004	1797	GO:0060762	0.009
1005	1443	GO:0045687	0.009
1006	1117	GO:0034115	0.009
1007	1357	GO:0043586	0.009
1008	1996	GO:1900103	0.009
1009	147	GO:0001933	0.009
1010	778	GO:0019646	0.009
1011	1860	GO:0070816	0.009
1012	1885	GO:0071253	0.009
1013	669	GO:0015002	0.009
1014	28	GO:0000139	0.009
1015	1208	GO:0035854	0.009
1016	771	GO:0019208	0.009
1017	2011	GO:2000098	0.009
1018	1552	GO:0048168	0.009
1019	793	GO:0019904	0.009
1020	894	GO:0030511	0.009
1021	43	GO:0000279	0.009
1022	980	GO:0031625	0.009
1023	1974	GO:0090230	0.009
1024	834	GO:0022011	0.009
1025	1529	GO:0046982	0.009
1026	1840	GO:0070411	0.009
1027	57	GO:0000444	0.009
1028	2016	GO:2000144	0.009
1029	1806	GO:0060977	0.009
1030	1244	GO:0042262	0.009
1031	2063	GO:2001027	0.009
1032	2033	GO:2000504	0.009
1033	1635	GO:0051041	0.009
1034	1169	GO:0035257	0.009
1035	748	GO:0017136	0.009
1036	1036	GO:0032508	0.009
1037	140	GO:0001841	0.009
1038	1065	GO:0033026	0.009
1039	1494	GO:0046579	0.009
1040	1231	GO:0042058	0.009
1041	320	GO:0005662	0.009
1042	1017	GO:0032275	0.009
1043	1518	GO:0046884	0.009
1044	574	GO:0009629	0.009
1045	2044	GO:2000679	0.009
1046	2026	GO:2000378	0.009
1047	333	GO:0005737	0.009
1048	220	GO:0003712	0.009
1049	595	GO:0010225	0.009
1050	1597	GO:0048844	0.009
1051	1459	GO:0045792	0.009
1052	358	GO:0005979	0.009
1053	1907	GO:0071639	0.009
1054	1058	GO:0032916	0.009
1055	128	GO:0001755	0.009
1056	1542	GO:0048015	0.009
1057	1422	GO:0045595	0.009
1058	52	GO:0000403	0.009
1059	1954	GO:0072686	0.009
1060	2047	GO:2000726	0.009
1061	688	GO:0016018	0.009
1062	1544	GO:0048024	0.009
1063	1803	GO:0060804	0.009
1064	472	GO:0007113	0.009
1065	1813	GO:0061302	0.009
1066	721	GO:0016580	0.009
1067	1527	GO:0046966	0.009
1068	198	GO:0003197	0.009
1069	1793	GO:0060749	0.009
1070	925	GO:0031056	0.009
1071	1853	GO:0070613	0.009
1072	104	GO:0001012	0.009
1073	1772	GO:0060596	0.009
1074	25	GO:0000117	0.009
1075	1095	GO:0033594	0.009
1076	1868	GO:0070935	0.009
1077	936	GO:0031134	0.009
1078	597	GO:0010332	0.009
1079	741	GO:0017015	0.009
1080	1138	GO:0034676	0.009
1081	1101	GO:0033619	0.009
1082	218	GO:0003697	0.009
1083	468	GO:0007096	0.009
1084	1927	GO:0072050	0.009
1085	746	GO:0017108	0.009
1086	806	GO:0021569	0.009
1087	1466	GO:0045859	0.009
1088	1508	GO:0046677	0.009
1089	1883	GO:0071218	0.009
1090	1490	GO:0046417	0.009
1091	2075	hsa03410	0.009
1092	926	GO:0031058	0.009
1093	1386	GO:0045023	0.009
1094	1076	GO:0033182	0.009
1095	470	GO:0007100	0.009
1096	1771	GO:0060576	0.009
1097	1051	GO:0032864	0.009
1098	673	GO:0015254	0.009
1099	185	GO:0002684	0.009
1100	1053	GO:0032873	0.009
1101	1782	GO:0060693	0.009
1102	192	GO:0003014	0.009
1103	2084	hsa05213	0.009
1104	2101	hsa05215	0.009
1105	1151	GO:0035033	0.009
1106	529	GO:0008272	0.008
1107	383	GO:0006288	0.008
1108	1630	GO:0050901	0.008
1109	1849	GO:0070534	0.008
1110	1859	GO:0070742	0.008
1111	228	GO:0003878	0.008
1112	121	GO:0001657	0.008
1113	643	GO:0010922	0.008
1114	35	GO:0000212	0.008
1115	1409	GO:0045244	0.008
1116	2013	GO:2000121	0.008
1117	388	GO:0006303	0.008
1118	413	GO:0006596	0.008
1119	1733	GO:0060166	0.008
1120	1758	GO:0060440	0.008
1121	1454	GO:0045749	0.008
1122	1612	GO:0050658	0.008
1123	406	GO:0006461	0.008
1124	2106	hsa05216	0.008
1125	553	GO:0008629	0.008
1126	2093	hsa05223	0.008
1127	1375	GO:0044297	0.008
1128	1080	GO:0033235	0.008
1129	1209	GO:0035855	0.008
1130	430	GO:0006921	0.008
1131	1506	GO:0046671	0.008
1132	2046	GO:2000706	0.008
1133	2057	GO:2000798	0.008
1134	360	GO:0006013	0.008
1135	2049	GO:2000740	0.008
1136	308	GO:0005606	0.008
1137	45	GO:0000296	0.008
1138	509	GO:0008024	0.008
1139	1037	GO:0032509	0.008
1140	889	GO:0030379	0.008
1141	1418	GO:0045475	0.008
1142	172	GO:0002248	0.008
1143	996	GO:0032025	0.008
1144	225	GO:0003830	0.008
1145	644	GO:0010925	0.008
1146	1852	GO:0070560	0.008
1147	1745	GO:0060305	0.008
1148	913	GO:0030845	0.008
1149	642	GO:0010920	0.008
1150	1372	GO:0044029	0.008
1151	259	GO:0004674	0.008
1152	2042	GO:2000653	0.008
1153	1857	GO:0070698	0.008
1154	493	GO:0007402	0.008
1155	514	GO:0008052	0.008
1156	674	GO:0015327	0.008
1157	1018	GO:0032288	0.008
1158	1196	GO:0035566	0.008
1159	872	GO:0030223	0.008
1160	629	GO:0010792	0.008
1161	90	GO:0000910	0.008
1162	1836	GO:0070324	0.008
1163	11	GO:0000072	0.008
1164	273	GO:0004861	0.008
1165	210	GO:0003680	0.008
1166	983	GO:0031647	0.008
1167	2080	hsa05210	0.008
1168	1623	GO:0050798	0.008
1169	636	GO:0010832	0.008
1170	1161	GO:0035117	0.008
1171	1593	GO:0048812	0.008
1172	1203	GO:0035690	0.008
1173	608	GO:0010506	0.008
1174	261	GO:0004693	0.008
1175	203	GO:0003283	0.008
1176	1128	GO:0034450	0.008
1177	1225	GO:0040009	0.008
1178	1353	GO:0043564	0.008
1179	1266	GO:0042585	0.008
1180	2087	hsa00563	0.008
1181	416	GO:0006760	0.008
1182	384	GO:0006297	0.008
1183	410	GO:0006491	0.008
1184	275	GO:0004875	0.008
1185	2072	GO:2001244	0.008
1186	577	GO:0009817	0.008
1187	176	GO:0002460	0.008
1188	1998	GO:1900126	0.008
1189	1171	GO:0035264	0.008
1190	1697	GO:0051881	0.008
1191	1421	GO:0045542	0.008
1192	1795	GO:0060751	0.008
1193	2054	GO:2000780	0.008
1194	314	GO:0005635	0.008
1195	2021	GO:2000276	0.008
1196	443	GO:0007019	0.008
1197	2056	GO:2000793	0.008
1198	2058	GO:2000802	0.008
1199	710	GO:0016505	0.008
1200	1087	GO:0033504	0.008
1201	1919	GO:0071895	0.008
1202	2	GO:0000014	0.008
1203	1160	GO:0035104	0.008
1204	950	GO:0031345	0.008
1205	1918	GO:0071866	0.008
1206	506	GO:0007622	0.008
1207	916	GO:0030870	0.008
1208	557	GO:0008635	0.008
1209	1715	GO:0055056	0.008
1210	813	GO:0021747	0.008
1211	1893	GO:0071353	0.008
1212	676	GO:0015631	0.008
1213	583	GO:0009986	0.008
1214	678	GO:0015705	0.008
1215	293	GO:0005496	0.008
1216	657	GO:0014002	0.008
1217	1146	GO:0034773	0.008
1218	359	GO:0005984	0.008
1219	1275	GO:0042799	0.008
1220	638	GO:0010835	0.008
1221	1397	GO:0045132	0.008
1222	235	GO:0003940	0.008
1223	1227	GO:0040017	0.008
1224	1537	GO:0047408	0.008
1225	1538	GO:0047409	0.008
1226	1278	GO:0042941	0.008
1227	1610	GO:0050512	0.008
1228	1778	GO:0060668	0.008
1229	1291	GO:0043017	0.008
1230	871	GO:0030222	0.008
1231	2076	hsa05219	0.008
1232	1041	GO:0032570	0.008
1233	803	GO:0021533	0.008
1234	1016	GO:0032270	0.008
1235	1323	GO:0043257	0.008
1236	1689	GO:0051754	0.008
1237	1343	GO:0043504	0.008
1238	944	GO:0031323	0.008
1239	290	GO:0005353	0.008
1240	1973	GO:0090219	0.008
1241	684	GO:0015929	0.008
1242	516	GO:0008073	0.008
1243	513	GO:0008049	0.008
1244	695	GO:0016231	0.008
1245	1131	GO:0034498	0.008
1246	1410	GO:0045295	0.008
1247	1481	GO:0045995	0.008
1248	1956	GO:0080134	0.008
1249	2048	GO:2000737	0.008
1250	828	GO:0021915	0.008
1251	2105	hsa04350	0.008
1252	1663	GO:0051345	0.008
1253	1070	GO:0033137	0.008
1254	1915	GO:0071813	0.008
1255	59	GO:0000506	0.008
1256	997	GO:0032071	0.008
1257	1140	GO:0034714	0.008
1258	1821	GO:0070063	0.008
1259	223	GO:0003721	0.008
1260	1819	GO:0070034	0.008
1261	237	GO:0003964	0.008
1262	182	GO:0002651	0.008
1263	183	GO:0002663	0.008
1264	677	GO:0015670	0.008
1265	1759	GO:0060443	0.008
1266	840	GO:0022616	0.008
1267	108	GO:0001077	0.008
1268	342	GO:0005795	0.008
1269	1163	GO:0035162	0.008
1270	1530	GO:0046983	0.008
1271	937	GO:0031175	0.008
1272	1395	GO:0045124	0.008
1273	1632	GO:0051000	0.008
1274	162	GO:0002064	0.008
1275	1122	GO:0034333	0.008
1276	1634	GO:0051019	0.008
1277	135	GO:0001829	0.008
1278	151	GO:0001940	0.008
1279	768	GO:0019049	0.008
1280	294	GO:0005497	0.008
1281	2009	GO:2000060	0.008
1282	299	GO:0005534	0.008
1283	1962	GO:0090068	0.008
1284	1753	GO:0060389	0.008
1285	445	GO:0007041	0.008
1286	1407	GO:0045198	0.008
1287	1691	GO:0051787	0.008
1288	1267	GO:0042598	0.008
1289	615	GO:0010616	0.008
1290	649	GO:0010972	0.008
1291	2015	GO:2000143	0.008
1292	1725	GO:0060051	0.008
1293	1462	GO:0045837	0.008
1294	1482	GO:0046060	0.008
1295	444	GO:0007033	0.008
1296	1888	GO:0071279	0.008
1297	1694	GO:0051865	0.007
1298	1465	GO:0045843	0.007
1299	1832	GO:0070301	0.007
1300	1501	GO:0046628	0.007
1301	1038	GO:0032526	0.007
1302	396	GO:0006338	0.007
1303	1361	GO:0043618	0.007
1304	1217	GO:0036003	0.007
1305	1975	GO:0090240	0.007
1306	1370	GO:0043985	0.007
1307	1104	GO:0033631	0.007
1308	1475	GO:0045931	0.007
1309	820	GO:0021846	0.007
1310	418	GO:0006888	0.007
1311	1704	GO:0051983	0.007
1312	1804	GO:0060900	0.007
1313	266	GO:0004719	0.007
1314	1565	GO:0048477	0.007
1315	1581	GO:0048711	0.007
1316	1791	GO:0060745	0.007
1317	727	GO:0016592	0.007
1318	1951	GO:0072602	0.007
1319	907	GO:0030674	0.007
1320	1091	GO:0033574	0.007
1321	713	GO:0016540	0.007
1322	1066	GO:0033034	0.007
1323	1911	GO:0071777	0.007
1324	1862	GO:0070836	0.007
1325	1202	GO:0035631	0.007
1326	2003	GO:2000008	0.007
1327	1242	GO:0042221	0.007
1328	1713	GO:0052904	0.007
1329	1712	GO:0052903	0.007
1330	1711	GO:0052902	0.007
1331	1709	GO:0052899	0.007
1332	1200	GO:0035621	0.007
1333	1986	GO:0097001	0.007
1334	1535	GO:0047291	0.007
1335	249	GO:0004513	0.007
1336	414	GO:0006598	0.007
1337	780	GO:0019782	0.007
1338	524	GO:0008215	0.007
1339	1522	GO:0046914	0.007
1340	1884	GO:0071228	0.007
1341	208	GO:0003677	0.007
1342	289	GO:0005198	0.007
1343	1362	GO:0043619	0.007
1344	1180	GO:0035358	0.007
1345	951	GO:0031393	0.007
1346	397	GO:0006343	0.007
1347	2031	GO:2000480	0.007
1348	990	GO:0031937	0.007
1349	1124	GO:0034391	0.007
1350	1148	GO:0034979	0.007
1351	2050	GO:2000757	0.007
1352	1445	GO:0045715	0.007
1353	2043	GO:2000655	0.007
1354	1452	GO:0045739	0.007
1355	1401	GO:0045171	0.007
1356	489	GO:0007281	0.007
1357	1776	GO:0060644	0.007
1358	354	GO:0005902	0.007
1359	1549	GO:0048145	0.007
1360	1272	GO:0042770	0.007
1361	132	GO:0001783	0.007
1362	500	GO:0007500	0.007
1363	1695	GO:0051879	0.007
1364	723	GO:0016584	0.007
1365	409	GO:0006476	0.007
1366	1340	GO:0043491	0.007
1367	805	GO:0021551	0.007
1368	1374	GO:0044212	0.007
1369	1762	GO:0060523	0.007
1370	982	GO:0031641	0.007
1371	1368	GO:0043923	0.007
1372	1617	GO:0050713	0.007
1373	1120	GO:0034191	0.007
1374	1162	GO:0035140	0.007
1375	1854	GO:0070633	0.007
1376	1750	GO:0060354	0.007
1377	1371	GO:0043997	0.007
1378	481	GO:0007179	0.007
1379	733	GO:0016818	0.007
1380	482	GO:0007183	0.007
1381	1358	GO:0043588	0.007
1382	970	GO:0031571	0.007
1383	1903	GO:0071479	0.007
1384	1405	GO:0045190	0.007
1385	243	GO:0004333	0.007
1386	1408	GO:0045239	0.007
1387	735	GO:0016890	0.007
1388	363	GO:0006106	0.007
1389	1416	GO:0045446	0.007
1390	415	GO:0006612	0.007
1391	1870	GO:0070972	0.007
1392	1600	GO:0048857	0.007
1393	726	GO:0016590	0.007
1394	2010	GO:2000095	0.007
1395	381	GO:0006284	0.007
1396	1078	GO:0033193	0.007
1397	956	GO:0031441	0.007
1398	1737	GO:0060217	0.007
1399	1461	GO:0045799	0.007
1400	1751	GO:0060375	0.007
1401	1268	GO:0042634	0.007
1402	271	GO:0004775	0.007
1403	146	GO:0001932	0.007
1404	1260	GO:0042551	0.007
1405	1106	GO:0033674	0.007
1406	1624	GO:0050815	0.007
1407	1435	GO:0045662	0.007
1408	1898	GO:0071407	0.007
1409	494	GO:0007403	0.007
1410	279	GO:0005026	0.007
1411	420	GO:0006895	0.007
1412	975	GO:0031581	0.007
1413	1074	GO:0033158	0.007
1414	538	GO:0008354	0.007
1415	1788	GO:0060742	0.007
1416	1642	GO:0051146	0.007
1417	1800	GO:0060768	0.007
1418	924	GO:0031053	0.007
1419	315	GO:0005637	0.007
1420	1596	GO:0048839	0.007
1421	1177	GO:0035313	0.007
1422	505	GO:0007596	0.007
1423	760	GO:0018105	0.007
1424	1591	GO:0048762	0.007
1425	1100	GO:0033613	0.007
1426	148	GO:0001934	0.007
1427	1305	GO:0043137	0.007
1428	67	GO:0000731	0.007
1429	1253	GO:0042475	0.007
1430	575	GO:0009649	0.007
1431	804	GO:0021537	0.007
1432	331	GO:0005724	0.007
1433	244	GO:0004342	0.007
1434	227	GO:0003868	0.007
1435	522	GO:0008207	0.007
1436	800	GO:0021526	0.007
1437	747	GO:0017123	0.007
1438	1050	GO:0032859	0.007
1439	816	GO:0021785	0.007
1440	620	GO:0010629	0.007
1441	1900	GO:0071455	0.007
1442	1247	GO:0042326	0.007
1443	842	GO:0023014	0.007
1444	133	GO:0001787	0.007
1445	598	GO:0010333	0.007
1446	1754	GO:0060390	0.007
1447	1743	GO:0060266	0.007
1448	138	GO:0001836	0.006
1449	854	GO:0030122	0.006
1450	1240	GO:0042177	0.006
1451	1382	GO:0044429	0.006
1452	1756	GO:0060394	0.006
1453	1515	GO:0046825	0.006
1454	325	GO:0005678	0.006
1455	1093	GO:0033591	0.006
1456	1545	GO:0048039	0.006
1457	1582	GO:0048712	0.006
1458	99	GO:0000980	0.006
1459	32	GO:0000183	0.006
1460	690	GO:0016050	0.006
1461	1348	GO:0043535	0.006
1462	1279	GO:0042953	0.006
1463	1784	GO:0060706	0.006
1464	635	GO:0010826	0.006
1465	344	GO:0005802	0.006
1466	1373	GO:0044154	0.006
1467	352	GO:0005876	0.006
1468	2097	hsa05212	0.006
1469	869	GO:0030220	0.006
1470	282	GO:0005080	0.006
1471	349	GO:0005829	0.006
1472	1025	GO:0032355	0.006
1473	1933	GO:0072177	0.006
1474	543	GO:0008420	0.006
1475	2037	GO:2000612	0.006
1476	976	GO:0031585	0.006
1477	1882	GO:0071203	0.006
1478	1300	GO:0043111	0.006
1479	650	GO:0010975	0.006
1480	422	GO:0006903	0.006
1481	697	GO:0016254	0.006
1482	160	GO:0002040	0.006
1483	867	GO:0030216	0.006
1484	1575	GO:0048642	0.006
1485	758	GO:0018024	0.006
1486	134	GO:0001822	0.006
1487	1619	GO:0050767	0.006
1488	426	GO:0006915	0.006
1489	394	GO:0006333	0.006
1490	512	GO:0008047	0.006
1491	968	GO:0031529	0.006
1492	1983	GO:0090400	0.006
1493	1511	GO:0046686	0.006
1494	116	GO:0001547	0.006
1495	184	GO:0002674	0.006
1496	1440	GO:0045670	0.006
1497	1121	GO:0034244	0.006
1498	884	GO:0030331	0.006
1499	1012	GO:0032203	0.006
1500	23	GO:0000089	0.006
1501	79	GO:0000792	0.006
1502	142	GO:0001885	0.006
1503	130	GO:0001764	0.006
1504	2090	hsa05218	0.006
1505	1127	GO:0034446	0.006
1506	540	GO:0008409	0.006
1507	824	GO:0021879	0.006
1508	1971	GO:0090200	0.006
1509	1450	GO:0045736	0.006
1510	1424	GO:0045597	0.006
1511	475	GO:0007131	0.006
1512	784	GO:0019836	0.006
1513	986	GO:0031669	0.006
1514	1474	GO:0045930	0.006
1515	1520	GO:0046902	0.006
1516	1732	GO:0060157	0.006
1517	627	GO:0010757	0.006
1518	838	GO:0022409	0.006
1519	1730	GO:0060074	0.006
1520	883	GO:0030330	0.006
1521	646	GO:0010944	0.006
1522	1460	GO:0045793	0.006
1523	1605	GO:0048873	0.006
1524	316	GO:0005652	0.006
1525	1578	GO:0048678	0.006
1526	153	GO:0001952	0.006
1527	424	GO:0006906	0.006
1528	1471	GO:0045893	0.006
1529	1622	GO:0050793	0.006
1530	496	GO:0007420	0.006
1531	423	GO:0006904	0.006
1532	212	GO:0003684	0.006
1533	761	GO:0018107	0.006
1534	1042	GO:0032580	0.006
1535	949	GO:0031343	0.006
1536	1559	GO:0048273	0.006
1537	561	GO:0008853	0.006
1538	2073	hsa05221	0.006
1539	1839	GO:0070410	0.006
1540	582	GO:0009925	0.006
1541	1594	GO:0048813	0.006
1542	312	GO:0005626	0.006
1543	847	GO:0030091	0.006
1544	1682	GO:0051595	0.006
1545	1347	GO:0043525	0.006
1546	732	GO:0016805	0.006
1547	1814	GO:0061309	0.006
1548	330	GO:0005721	0.006
1549	1285	GO:0042993	0.006
1550	1568	GO:0048487	0.006
1551	1415	GO:0045445	0.006
1552	186	GO:0002740	0.006
1553	973	GO:0031575	0.006
1554	112	GO:0001103	0.006
1555	1055	GO:0032880	0.006
1556	1792	GO:0060748	0.006
1557	150	GO:0001939	0.006
1558	1486	GO:0046293	0.006
1559	250	GO:0004518	0.006
1560	724	GO:0016585	0.006
1561	369	GO:0006235	0.006
1562	1390	GO:0045104	0.006
1563	399	GO:0006346	0.005
1564	1423	GO:0045596	0.005
1565	1391	GO:0045109	0.005
1566	126	GO:0001709	0.005
1567	122	GO:0001666	0.005
1568	1877	GO:0071157	0.005
1569	1274	GO:0042789	0.005
1570	1992	GO:0097150	0.005
1571	1952	GO:0072659	0.005
1572	389	GO:0006309	0.005
1573	1714	GO:0055037	0.005
1574	964	GO:0031519	0.005
1575	1263	GO:0042578	0.005
1576	802	GO:0021530	0.005
1577	1557	GO:0048257	0.005
1578	698	GO:0016301	0.005
1579	1728	GO:0060065	0.005
1580	1980	GO:0090344	0.005
1581	792	GO:0019903	0.005
1582	1965	GO:0090102	0.005
1583	985	GO:0031659	0.005
1584	1487	GO:0046329	0.005
1585	491	GO:0007369	0.005
1586	1595	GO:0048821	0.005
1587	868	GO:0030219	0.005
1588	1556	GO:0048256	0.005
1589	1228	GO:0040020	0.005
1590	1579	GO:0048701	0.005
1591	2070	GO:2001223	0.005
1592	1710	GO:0052901	0.005
1593	819	GO:0021816	0.005
1594	1398	GO:0045137	0.005
1595	902	GO:0030641	0.005
1596	361	GO:0006043	0.005
1597	1144	GO:0034766	0.005
1598	89	GO:0000836	0.005
1599	1495	GO:0046592	0.005
1600	1378	GO:0044327	0.005
1601	1271	GO:0042766	0.005
1602	632	GO:0010813	0.005
1603	852	GO:0030108	0.005
1604	1143	GO:0034755	0.005
1605	188	GO:0002764	0.005
1606	1760	GO:0060448	0.005
1607	1088	GO:0033557	0.005
1608	882	GO:0030324	0.005
1609	1845	GO:0070508	0.005
1610	537	GO:0008347	0.005
1611	1145	GO:0034770	0.005
1612	1967	GO:0090128	0.005
1613	442	GO:0007004	0.005
1614	876	GO:0030277	0.005
1615	1328	GO:0043281	0.005
1616	2014	GO:2000134	0.005
1617	908	GO:0030675	0.005
1618	302	GO:0005579	0.005
1619	285	GO:0005160	0.005
1620	861	GO:0030155	0.005
1621	1	GO:0000012	0.005
1622	947	GO:0031334	0.005
1623	1786	GO:0060736	0.005
1624	1334	GO:0043406	0.005
1625	1149	GO:0035020	0.005
1626	1303	GO:0043125	0.005
1627	573	GO:0009611	0.005
1628	1426	GO:0045603	0.005
1629	29	GO:0000150	0.005
1630	1807	GO:0060980	0.005
1631	291	GO:0005355	0.005
1632	175	GO:0002430	0.005
1633	555	GO:0008633	0.005
1634	1553	GO:0048208	0.005
1635	141	GO:0001848	0.005
1636	539	GO:0008408	0.005
1637	991	GO:0031952	0.005
1638	613	GO:0010592	0.005
1639	1387	GO:0045063	0.005
1640	706	GO:0016477	0.005
1641	730	GO:0016772	0.005
1642	1627	GO:0050847	0.005
1643	893	GO:0030500	0.005
1644	253	GO:0004525	0.005
1645	1318	GO:0043231	0.005
1646	839	GO:0022614	0.005
1647	651	GO:0010976	0.005
1648	934	GO:0031115	0.005
1649	1280	GO:0042975	0.005
1650	1673	GO:0051493	0.005
1651	1302	GO:0043124	0.005
1652	1049	GO:0032835	0.005
1653	1895	GO:0071383	0.005
1654	587	GO:0010033	0.005
1655	518	GO:0008090	0.005
1656	865	GO:0030194	0.005
1657	1243	GO:0042246	0.005
1658	1329	GO:0043297	0.005
1659	1314	GO:0043200	0.005
1660	1637	GO:0051091	0.005
1661	1429	GO:0045618	0.005
1662	257	GO:0004663	0.005
1663	1309	GO:0043153	0.005
1664	486	GO:0007229	0.005
1665	1159	GO:0035102	0.005
1666	1075	GO:0033169	0.005
1667	738	GO:0016925	0.005
1668	341	GO:0005794	0.005
1669	781	GO:0019789	0.005
1670	30	GO:0000159	0.005
1671	58	GO:0000492	0.005
1672	356	GO:0005968	0.005
1673	1721	GO:0060004	0.005
1674	648	GO:0010966	0.005
1675	742	GO:0017017	0.005
1676	2067	GO:2001054	0.005
1677	1413	GO:0045408	0.005
1678	1668	GO:0051403	0.005
1679	353	GO:0005901	0.005
1680	1744	GO:0060291	0.005
1681	1293	GO:0043065	0.005
1682	179	GO:0002521	0.005
1683	119	GO:0001578	0.005
1684	989	GO:0031901	0.005
1685	1296	GO:0043069	0.005
1686	173	GO:0002326	0.005
1687	1270	GO:0042641	0.005
1688	46	GO:0000302	0.005
1689	993	GO:0031954	0.005
1690	797	GO:0021510	0.005
1691	1431	GO:0045638	0.005
1692	1451	GO:0045737	0.005
1693	298	GO:0005524	0.005
1694	967	GO:0031528	0.005
1695	1137	GO:0034648	0.005
1696	161	GO:0002052	0.005
1697	938	GO:0031232	0.005
1698	1850	GO:0070542	0.005
1699	1417	GO:0045471	0.005
1700	1436	GO:0045663	0.005
1701	2061	GO:2000974	0.005
1702	1736	GO:0060216	0.005
1703	408	GO:0006469	0.005
1704	1147	GO:0034968	0.005
1705	1716	GO:0055087	0.005
1706	981	GO:0031627	0.004
1707	311	GO:0005610	0.004
1708	1769	GO:0060571	0.004
1709	785	GO:0019838	0.004
1710	1676	GO:0051560	0.004
1711	1755	GO:0060391	0.004
1712	1319	GO:0043234	0.004
1713	619	GO:0010628	0.004
1714	1621	GO:0050786	0.004
1715	139	GO:0001837	0.004
1716	441	GO:0006979	0.004
1717	1896	GO:0071391	0.004
1718	1351	GO:0043542	0.004
1719	487	GO:0007258	0.004
1720	327	GO:0005697	0.004
1721	1599	GO:0048854	0.004
1722	1572	GO:0048593	0.004
1723	1626	GO:0050821	0.004
1724	699	GO:0016310	0.004
1725	594	GO:0010224	0.004
1726	1084	GO:0033280	0.004
1727	830	GO:0021978	0.004
1728	1636	GO:0051054	0.004
1729	1411	GO:0045335	0.004
1730	853	GO:0030117	0.004
1731	1265	GO:0042584	0.004
1732	1780	GO:0060685	0.004
1733	48	GO:0000320	0.004
1734	262	GO:0004709	0.004
1735	1517	GO:0046847	0.004
1736	1069	GO:0033129	0.004
1737	1726	GO:0060055	0.004
1738	751	GO:0017159	0.004
1739	1312	GO:0043167	0.004
1740	1887	GO:0071267	0.004
1741	745	GO:0017089	0.004
1742	1493	GO:0046570	0.004
1743	960	GO:0031493	0.004
1744	1000	GO:0032093	0.004
1745	904	GO:0030659	0.004
1746	585	GO:0010008	0.004
1747	1916	GO:0071850	0.004
1748	2008	GO:2000059	0.004
1749	1576	GO:0048663	0.004
1750	831	GO:0021983	0.004
1751	306	GO:0005604	0.004
1752	1204	GO:0035748	0.004
1753	1727	GO:0060056	0.004
1754	417	GO:0006839	0.004
1755	258	GO:0004672	0.004
1756	833	GO:0022008	0.004
1757	1331	GO:0043388	0.004
1758	952	GO:0031398	0.004
1759	858	GO:0030139	0.004
1760	2099	hsa05020	0.004
1761	1525	GO:0046930	0.004
1762	252	GO:0004523	0.004
1763	1667	GO:0051402	0.004
1764	609	GO:0010521	0.004
1765	305	GO:0005588	0.004
1766	219	GO:0003700	0.004
1767	9	GO:0000066	0.004
1768	1823	GO:0070141	0.004
1769	860	GO:0030145	0.004
1770	8	GO:0000064	0.004
1771	1598	GO:0048853	0.004
1772	630	GO:0010800	0.004
1773	1499	GO:0046620	0.004
1774	1083	GO:0033267	0.004
1775	411	GO:0006501	0.004
1776	205	GO:0003290	0.004
1777	610	GO:0010544	0.004
1778	1641	GO:0051101	0.004
1779	284	GO:0005114	0.004
1780	427	GO:0006916	0.004
1781	637	GO:0010834	0.004
1782	1024	GO:0032321	0.004
1783	1847	GO:0070527	0.004
1784	1455	GO:0045765	0.004
1785	901	GO:0030618	0.004
1786	639	GO:0010842	0.004
1787	866	GO:0030195	0.004
1788	1346	GO:0043524	0.004
1789	1320	GO:0043243	0.004
1790	51	GO:0000400	0.004
1791	2086	hsa05214	0.004
1792	1990	GO:0097136	0.004
1793	355	GO:0005905	0.004
1794	864	GO:0030193	0.004
1795	324	GO:0005677	0.004
1796	914	GO:0030850	0.004
1797	1777	GO:0060662	0.004
1798	1943	GO:0072332	0.004
1799	1341	GO:0043496	0.004
1800	421	GO:0006897	0.004
1801	115	GO:0001309	0.004
1802	1014	GO:0032214	0.004
1803	1863	GO:0070848	0.004
1804	689	GO:0016044	0.004
1805	385	GO:0006298	0.004
1806	2079	hsa04710	0.004
1807	213	GO:0003688	0.004
1808	579	GO:0009898	0.004
1809	336	GO:0005768	0.004
1810	1500	GO:0046627	0.004
1811	1310	GO:0043154	0.004
1812	131	GO:0001776	0.004
1813	954	GO:0031434	0.004
1814	144	GO:0001890	0.004
1815	966	GO:0031527	0.004
1816	1669	GO:0051434	0.004
1817	817	GO:0021795	0.003
1818	436	GO:0006958	0.003
1819	1562	GO:0048340	0.003
1820	2083	hsa04144	0.003
1821	280	GO:0005070	0.003
1822	919	GO:0030949	0.003
1823	2074	hsa04520	0.003
1824	535	GO:0008327	0.003
1825	337	GO:0005769	0.003
1826	851	GO:0030100	0.003
1827	700	GO:0016323	0.003
1828	1567	GO:0048485	0.003
1829	1453	GO:0045742	0.003
1830	879	GO:0030307	0.003
1831	709	GO:0016504	0.003
1832	787	GO:0019897	0.003
1833	1056	GO:0032886	0.003
1834	1989	GO:0097067	0.003
1835	1653	GO:0051272	0.003
1836	1618	GO:0050714	0.003
1837	98	GO:0000979	0.003
1838	799	GO:0021522	0.003
1839	1327	GO:0043280	0.003
1840	672	GO:0015250	0.003
1841	1335	GO:0043407	0.003
1842	158	GO:0002020	0.003
1843	1326	GO:0043277	0.003
1844	584	GO:0010001	0.003
1845	329	GO:0005720	0.003
1846	340	GO:0005793	0.003
1847	716	GO:0016571	0.003
1848	307	GO:0005605	0.003
1849	532	GO:0008284	0.003
1850	534	GO:0008287	0.003
1851	1118	GO:0034116	0.003
1852	1349	GO:0043537	0.003
1853	2085	hsa04510	0.003
1854	488	GO:0007265	0.003
1855	826	GO:0021895	0.003
1856	492	GO:0007398	0.003
1857	2027	GO:2000379	0.003
1858	681	GO:0015840	0.003
1859	1844	GO:0070487	0.003
1860	274	GO:0004869	0.003
1861	1647	GO:0051219	0.003
1862	815	GO:0021766	0.003
1863	1157	GO:0035066	0.003
1864	645	GO:0010940	0.003
1865	1512	GO:0046688	0.003
1866	123	GO:0001669	0.003
1867	268	GO:0004722	0.003
1868	484	GO:0007220	0.003
1869	841	GO:0022891	0.003
1870	66	GO:0000730	0.003
1871	788	GO:0019898	0.003
1872	1255	GO:0042490	0.003
1873	863	GO:0030183	0.003
1874	215	GO:0003690	0.003
1875	1232	GO:0042059	0.003
1876	1269	GO:0042640	0.003
1877	844	GO:0030010	0.003
1878	118	GO:0001568	0.003
1879	1139	GO:0034713	0.003
1880	393	GO:0006325	0.003
1881	254	GO:0004531	0.003
1882	946	GO:0031333	0.003
1883	1894	GO:0071363	0.003
1884	523	GO:0008209	0.003
1885	1558	GO:0048261	0.003
1886	886	GO:0030334	0.003
1887	1613	GO:0050678	0.003
1888	1924	GO:0071944	0.003
1889	850	GO:0030099	0.003
1890	328	GO:0005719	0.003
1891	1029	GO:0032418	0.003
1892	691	GO:0016079	0.003
1893	1590	GO:0048754	0.003
1894	1702	GO:0051918	0.003
1895	437	GO:0006970	0.003
1896	480	GO:0007173	0.003
1897	1968	GO:0090136	0.003
1898	1059	GO:0032922	0.003
1899	264	GO:0004713	0.003
1900	1174	GO:0035307	0.003
1901	1837	GO:0070372	0.003
1902	1141	GO:0034720	0.003
1903	283	GO:0005112	0.003
1904	345	GO:0005811	0.003
1905	239	GO:0004089	0.002
1906	1394	GO:0045123	0.002
1907	152	GO:0001948	0.002
1908	1643	GO:0051150	0.002
1909	1698	GO:0051893	0.002
1910	34	GO:0000188	0.002
1911	1251	GO:0042470	0.002
1912	251	GO:0004520	0.002
1913	1456	GO:0045768	0.002
1914	795	GO:0019953	0.002
1915	432	GO:0006927	0.002
1916	891	GO:0030449	0.002
1917	433	GO:0006944	0.002
1918	1838	GO:0070373	0.002
1919	1674	GO:0051496	0.002
1920	2004	GO:2000017	0.002
1921	599	GO:0010369	0.002
1922	1513	GO:0046777	0.002
1923	1748	GO:0060325	0.002
1924	31	GO:0000165	0.002
1925	7	GO:0000060	0.002
1926	478	GO:0007155	0.002
1927	265	GO:0004716	0.002
1928	1393	GO:0045121	0.002
1929	511	GO:0008045	0.002
1930	1126	GO:0034405	0.002
1931	338	GO:0005770	0.002
1932	33	GO:0000186	0.002
1933	857	GO:0030136	0.002
1934	551	GO:0008601	0.002
1935	434	GO:0006956	0.002
1936	1125	GO:0034394	0.002
1937	1820	GO:0070059	0.002
1938	711	GO:0016514	0.002
1939	199	GO:0003203	0.002
1940	174	GO:0002360	0.002
1941	295	GO:0005507	0.002
1942	906	GO:0030667	0.002
1943	856	GO:0030131	0.002
1944	407	GO:0006468	0.002
1945	1188	GO:0035497	0.002
1946	1338	GO:0043425	0.002
1947	930	GO:0031092	0.002
1948	96	GO:0000977	0.002
1949	1865	GO:0070888	0.001
1950	1354	GO:0043565	0.001
1951	1259	GO:0042542	0.001
1952	749	GO:0017137	0.001
1953	1425	GO:0045599	0.001
1954	428	GO:0006917	0.001
1955	664	GO:0014070	0.001
1956	1330	GO:0043353	0.001
1957	400	GO:0006349	0.001
1958	1749	GO:0060326	0.001
1959	922	GO:0030971	0.001
1960	1477	GO:0045944	0.001
1961	766	GO:0019028	0.001
1962	586	GO:0010025	0.001
1963	41	GO:0000240	0.001
1964	618	GO:0010627	0.001
1965	6	GO:0000026	0.001
1966	634	GO:0010822	0.001
1967	773	GO:0019236	0.001
1968	614	GO:0010611	0.001
1969	755	GO:0018012	0.001
1970	765	GO:0018872	0.001
1971	2023	GO:2000348	0.001
1972	542	GO:0008418	0.001
1973	548	GO:0008532	0.001
1974	547	GO:0008493	0.001
1975	2020	GO:2000253	0.001
1976	753	GO:0017177	0.001
1977	754	GO:0018009	0.001
1978	708	GO:0016503	0.001
1979	2034	GO:2000507	0.001
1980	36	GO:0000215	0.001
1981	2029	GO:2000465	0.001
1982	2028	GO:2000406	0.001
1983	2019	GO:2000209	0.001
1984	640	GO:0010869	0.001
1985	759	GO:0018025	0.001
1986	682	GO:0015904	0.001
1987	656	GO:0012510	0.001
1988	563	GO:0009021	0.001
1989	2066	GO:2001045	0.001
1990	665	GO:0014739	0.001
1991	764	GO:0018455	0.001
1992	39	GO:0000225	0.001
1993	756	GO:0018016	0.001
1994	2060	GO:2000827	0.001
1995	559	GO:0008808	0.001
1996	694	GO:0016229	0.001
1997	775	GO:0019319	0.001
1998	1541	GO:0047730	0.001
1999	339	GO:0005775	0.001
[truncated: 107 more rows]

## Sheet: Dateset3 mRMR Table
Order	Feature	Name	Score
1	234	GO:0003918	0.035
2	942	GO:0031301	0.029
3	1476	GO:0045943	0.023
4	1218	GO:0036071	0.019
5	1469	GO:0045875	0.018
6	1441	GO:0045682	0.019
7	928	GO:0031065	0.015
8	50	GO:0000380	0.015
9	405	GO:0006359	0.015
10	362	GO:0006044	0.013
11	1301	GO:0043112	0.013
12	91	GO:0000915	0.013
13	1430	GO:0045624	0.013
14	156	GO:0002009	0.012
15	255	GO:0004572	0.012
16	1194	GO:0035520	0.012
17	544	GO:0008424	0.011
18	1606	GO:0048878	0.011
19	281	GO:0005072	0.011
20	1661	GO:0051322	0.011
21	1897	GO:0071398	0.011
22	1829	GO:0070254	0.01
23	1523	GO:0046921	0.011
24	1503	GO:0046632	0.01
25	510	GO:0008035	0.01
26	73	GO:0000780	0.01
27	1034	GO:0032463	0.01
28	1201	GO:0035624	0.01
29	1092	GO:0033578	0.01
30	1805	GO:0060931	0.01
31	1767	GO:0060564	0.01
32	1536	GO:0047293	0.01
33	528	GO:0008270	0.01
34	2005	GO:2000036	0.01
35	402	GO:0006353	0.009
36	1957	GO:0085020	0.01
37	1773	GO:0060598	0.009
38	1574	GO:0048638	0.009
39	1521	GO:0046903	0.009
40	739	GO:0016938	0.009
41	471	GO:0007108	0.009
42	812	GO:0021695	0.009
43	177	GO:0002495	0.009
44	1403	GO:0045178	0.009
45	1856	GO:0070683	0.009
46	752	GO:0017176	0.008
47	1344	GO:0043517	0.008
48	1155	GO:0035064	0.008
49	731	GO:0016799	0.008
50	740	GO:0016971	0.008
51	1561	GO:0048333	0.008
52	1116	GO:0034098	0.008
53	474	GO:0007127	0.008
54	165	GO:0002083	0.008
55	1164	GO:0035173	0.008
56	1261	GO:0042552	0.007
57	1700	GO:0051901	0.007
58	196	GO:0003167	0.007
59	855	GO:0030127	0.007
60	1142	GO:0034722	0.008
61	1105	GO:0033673	0.008
62	453	GO:0007062	0.008
63	1679	GO:0051574	0.008
64	1631	GO:0050902	0.008
65	905	GO:0030660	0.007
66	1278	GO:0042941	0.007
67	1835	GO:0070317	0.007
68	375	GO:0006268	0.007
69	38	GO:0000224	0.007
70	1588	GO:0048733	0.008
71	1324	GO:0043259	0.007
72	1238	GO:0042162	0.007
73	707	GO:0016480	0.007
74	662	GO:0014044	0.007
75	1994	GO:0097225	0.007
76	1879	GO:0071168	0.007
77	1192	GO:0035518	0.007
78	1123	GO:0034389	0.007
79	1660	GO:0051310	0.007
80	166	GO:0002102	0.007
81	679	GO:0015739	0.007
82	1156	GO:0035065	0.007
83	778	GO:0019646	0.007
84	671	GO:0015149	0.006
85	1969	GO:0090166	0.007
86	1179	GO:0035330	0.006
87	194	GO:0003131	0.006
88	1610	GO:0050512	0.006
89	438	GO:0006974	0.007
90	1899	GO:0071449	0.006
91	256	GO:0004659	0.006
92	301	GO:0005577	0.006
93	569	GO:0009294	0.006
94	683	GO:0015923	0.006
95	895	GO:0030512	0.006
96	1133	GO:0034509	0.006
97	292	GO:0005488	0.006
98	1047	GO:0032803	0.006
99	1283	GO:0042985	0.006
100	1657	GO:0051298	0.006
101	1652	GO:0051271	0.006
102	1537	GO:0047408	0.006
103	1399	GO:0045143	0.006
104	814	GO:0021761	0.006
105	1789	GO:0060743	0.006
106	546	GO:0008475	0.006
107	578	GO:0009893	0.006
108	1392	GO:0045120	0.006
109	670	GO:0015136	0.006
110	310	GO:0005608	0.006
111	878	GO:0030301	0.006
112	622	GO:0010694	0.006
113	1376	GO:0044314	0.006
114	1538	GO:0047409	0.006
115	88	GO:0000819	0.006
116	1284	GO:0042992	0.006
117	1030	GO:0032422	0.006
118	260	GO:0004677	0.006
119	823	GO:0021877	0.006
120	892	GO:0030496	0.006
121	780	GO:0019782	0.006
122	846	GO:0030056	0.006
123	712	GO:0016538	0.006
124	380	GO:0006282	0.006
125	120	GO:0001655	0.006
126	669	GO:0015002	0.006
127	1200	GO:0035621	0.006
128	600	GO:0010389	0.006
129	821	GO:0021858	0.006
130	1311	GO:0043161	0.006
131	701	GO:0016324	0.006
132	1467	GO:0045862	0.006
133	226	GO:0003839	0.006
134	1082	GO:0033262	0.006
135	898	GO:0030540	0.006
136	931	GO:0031098	0.006
137	859	GO:0030140	0.006
138	912	GO:0030844	0.006
139	5	GO:0000022	0.006
140	955	GO:0031436	0.006
141	1885	GO:0071253	0.006
142	870	GO:0030221	0.005
143	240	GO:0004137	0.005
144	1186	GO:0035428	0.005
145	2041	GO:2000648	0.005
146	378	GO:0006275	0.005
147	1986	GO:0097001	0.005
148	1775	GO:0060623	0.005
149	113	GO:0001106	0.005
150	44	GO:0000293	0.005
151	971	GO:0031572	0.005
152	342	GO:0005795	0.005
153	233	GO:0003917	0.005
154	685	GO:0015964	0.005
155	1315	GO:0043208	0.005
156	1182	GO:0035371	0.005
157	1044	GO:0032799	0.005
158	545	GO:0008432	0.005
159	962	GO:0031507	0.005
160	944	GO:0031323	0.005
161	1297	GO:0043085	0.005
162	825	GO:0021889	0.005
163	1648	GO:0051225	0.005
164	1384	GO:0044539	0.005
165	1252	GO:0042471	0.005
166	232	GO:0003916	0.005
167	1317	GO:0043220	0.005
168	1973	GO:0090219	0.005
169	929	GO:0031081	0.005
170	1193	GO:0035519	0.005
171	1325	GO:0043260	0.005
172	1778	GO:0060668	0.005
173	720	GO:0016575	0.005
174	1480	GO:0045955	0.005
175	365	GO:0006123	0.005
176	1991	GO:0097149	0.005
177	1046	GO:0032802	0.005
178	560	GO:0008821	0.005
179	1072	GO:0033148	0.005
180	1313	GO:0043175	0.005
181	684	GO:0015929	0.005
182	1873	GO:0071065	0.004
183	2006	GO:2000042	0.005
184	386	GO:0006301	0.004
185	290	GO:0005353	0.004
186	1872	GO:0071062	0.004
187	1485	GO:0046092	0.004
188	455	GO:0007064	0.004
189	923	GO:0031052	0.004
190	522	GO:0008207	0.004
191	737	GO:0016922	0.004
192	1713	GO:0052904	0.004
193	1264	GO:0042583	0.004
194	1601	GO:0048858	0.004
195	348	GO:0005828	0.004
196	1677	GO:0051571	0.004
197	28	GO:0000139	0.004
198	543	GO:0008420	0.004
199	862	GO:0030174	0.004
200	624	GO:0010719	0.004
201	1146	GO:0034773	0.004
202	2007	GO:2000045	0.004
203	236	GO:0003953	0.004
204	527	GO:0008262	0.004
205	360	GO:0006013	0.004
206	1889	GO:0071283	0.004
207	2087	hsa00563	0.004
208	469	GO:0007098	0.004
209	1227	GO:0040017	0.004
210	1250	GO:0042415	0.004
211	1712	GO:0052903	0.004
212	1119	GO:0034190	0.004
213	796	GO:0019985	0.004
214	722	GO:0016581	0.004
215	1540	GO:0047710	0.004
216	1937	GO:0072278	0.004
217	513	GO:0008049	0.004
218	747	GO:0017123	0.004
219	1633	GO:0051010	0.004
220	1717	GO:0055096	0.004
221	564	GO:0009048	0.004
222	933	GO:0031102	0.004
223	267	GO:0004721	0.004
224	423	GO:0006904	0.004
225	297	GO:0005518	0.004
226	1226	GO:0040016	0.004
227	1213	GO:0035978	0.004
228	680	GO:0015755	0.004
229	628	GO:0010767	0.004
230	1402	GO:0045175	0.004
231	2070	GO:2001223	0.004
232	1831	GO:0070295	0.004
233	625	GO:0010724	0.004
234	530	GO:0008278	0.004
235	1729	GO:0060068	0.004
236	1040	GO:0032548	0.004
237	811	GO:0021666	0.004
238	1175	GO:0035308	0.004
239	1711	GO:0052902	0.004
240	1740	GO:0060252	0.004
241	1275	GO:0042799	0.004
242	1321	GO:0043254	0.004
243	1526	GO:0046947	0.004
244	373	GO:0006265	0.004
245	309	GO:0005607	0.004
246	460	GO:0007088	0.004
247	1144	GO:0034766	0.004
248	1963	GO:0090074	0.004
249	370	GO:0006259	0.004
250	1754	GO:0060390	0.004
251	1071	GO:0033145	0.004
252	410	GO:0006491	0.004
253	1706	GO:0051987	0.004
254	1216	GO:0035987	0.004
255	695	GO:0016231	0.004
256	1709	GO:0052899	0.004
257	819	GO:0021816	0.004
258	1478	GO:0045945	0.004
259	1224	GO:0040001	0.004
260	647	GO:0010952	0.004
261	14	GO:0000077	0.004
262	638	GO:0010835	0.004
263	2071	GO:2001241	0.004
264	243	GO:0004333	0.004
265	874	GO:0030261	0.004
266	800	GO:0021526	0.004
267	1909	GO:0071732	0.004
268	786	GO:0019865	0.004
269	414	GO:0006598	0.004
270	1785	GO:0060710	0.004
271	816	GO:0021785	0.004
272	1420	GO:0045541	0.004
273	227	GO:0003868	0.004
274	520	GO:0008156	0.004
275	598	GO:0010333	0.004
276	673	GO:0015254	0.004
277	1959	GO:0090003	0.004
278	418	GO:0006888	0.004
279	1028	GO:0032405	0.004
280	902	GO:0030641	0.004
281	94	GO:0000940	0.004
282	361	GO:0006043	0.004
283	2064	GO:2001033	0.004
284	1050	GO:0032859	0.004
285	106	GO:0001046	0.004
286	59	GO:0000506	0.004
287	1566	GO:0048478	0.004
288	524	GO:0008215	0.004
289	168	GO:0002162	0.004
290	1378	GO:0044327	0.004
291	1509	GO:0046680	0.004
292	1683	GO:0051635	0.004
293	287	GO:0005176	0.004
294	580	GO:0009912	0.004
295	1370	GO:0043985	0.004
296	1743	GO:0060266	0.004
297	571	GO:0009330	0.004
298	688	GO:0016018	0.004
299	412	GO:0006513	0.004
300	244	GO:0004342	0.004
301	719	GO:0016574	0.004
302	2038	GO:2000615	0.004
303	225	GO:0003830	0.003
304	617	GO:0010626	0.003
305	1446	GO:0045717	0.003
306	552	GO:0008608	0.004
307	1129	GO:0034451	0.003
308	1042	GO:0032580	0.003
309	1333	GO:0043398	0.003
310	493	GO:0007402	0.003
311	1131	GO:0034498	0.003
312	61	GO:0000710	0.003
313	2045	GO:2000685	0.003
314	660	GO:0014037	0.003
315	18	GO:0000083	0.003
316	757	GO:0018023	0.003
317	415	GO:0006612	0.003
318	822	GO:0021873	0.003
319	677	GO:0015670	0.003
320	1766	GO:0060547	0.003
321	2017	GO:2000145	0.003
322	473	GO:0007126	0.003
323	1113	GO:0034056	0.003
324	185	GO:0002684	0.003
325	266	GO:0004719	0.003
326	1312	GO:0043167	0.003
327	1037	GO:0032509	0.003
328	95	GO:0000942	0.003
329	516	GO:0008073	0.003
330	727	GO:0016592	0.003
331	1577	GO:0048665	0.003
332	1457	GO:0045769	0.003
333	246	GO:0004407	0.003
334	696	GO:0016242	0.003
335	1190	GO:0035500	0.003
336	1323	GO:0043257	0.003
337	1870	GO:0070972	0.003
338	382	GO:0006287	0.003
339	1887	GO:0071267	0.003
340	1796	GO:0060761	0.003
341	1419	GO:0045502	0.003
342	615	GO:0010616	0.003
343	517	GO:0008089	0.003
344	1635	GO:0051041	0.003
345	835	GO:0022027	0.003
346	207	GO:0003334	0.003
347	334	GO:0005741	0.003
348	413	GO:0006596	0.003
349	767	GO:0019035	0.003
350	663	GO:0014067	0.003
351	1493	GO:0046570	0.003
352	1167	GO:0035196	0.003
353	1143	GO:0034755	0.003
354	304	GO:0005586	0.003
355	465	GO:0007093	0.003
356	514	GO:0008052	0.003
357	1191	GO:0035501	0.003
358	621	GO:0010669	0.003
359	1244	GO:0042262	0.003
360	745	GO:0017089	0.003
361	1086	GO:0033484	0.003
362	1332	GO:0043393	0.003
363	45	GO:0000296	0.003
364	529	GO:0008272	0.003
365	995	GO:0031988	0.003
366	1739	GO:0060236	0.003
367	127	GO:0001739	0.003
368	601	GO:0010421	0.003
369	359	GO:0005984	0.003
370	1547	GO:0048102	0.003
371	525	GO:0008238	0.003
372	111	GO:0001102	0.003
373	1535	GO:0047291	0.003
374	1685	GO:0051661	0.003
375	1833	GO:0070306	0.003
376	1853	GO:0070613	0.003
377	1718	GO:0055100	0.003
378	649	GO:0010972	0.003
379	1239	GO:0042176	0.003
380	137	GO:0001833	0.003
381	1554	GO:0048227	0.003
382	810	GO:0021660	0.003
383	1725	GO:0060051	0.003
384	20	GO:0000085	0.003
385	1408	GO:0045239	0.003
386	1490	GO:0046417	0.003
387	1910	GO:0071733	0.003
388	1262	GO:0042555	0.003
389	249	GO:0004513	0.003
390	1237	GO:0042159	0.003
391	1398	GO:0045137	0.003
392	1073	GO:0033153	0.003
393	235	GO:0003940	0.003
394	509	GO:0008024	0.003
395	1468	GO:0045870	0.003
396	678	GO:0015705	0.003
397	1383	GO:0044464	0.003
398	632	GO:0010813	0.003
399	2053	GO:2000779	0.003
400	1854	GO:0070633	0.003
401	1367	GO:0043697	0.003
402	231	GO:0003906	0.003
403	549	GO:0008574	0.003
404	845	GO:0030030	0.003
405	331	GO:0005724	0.003
406	1560	GO:0048332	0.003
407	17	GO:0000082	0.003
408	344	GO:0005802	0.002
409	1516	GO:0046826	0.002
410	1857	GO:0070698	0.002
411	1868	GO:0070935	0.002
412	416	GO:0006760	0.002
413	541	GO:0008413	0.002
414	918	GO:0030892	0.002
415	1864	GO:0070887	0.002
416	2046	GO:2000706	0.002
417	1165	GO:0035174	0.002
418	422	GO:0006903	0.002
419	925	GO:0031056	0.002
420	1322	GO:0043256	0.002
421	1054	GO:0032876	0.002
422	1482	GO:0046060	0.002
423	1779	GO:0060669	0.002
424	1522	GO:0046914	0.002
425	1691	GO:0051787	0.002
426	1939	GO:0072300	0.002
427	852	GO:0030108	0.002
428	92	GO:0000922	0.002
429	1043	GO:0032794	0.002
430	889	GO:0030379	0.002
431	702	GO:0016363	0.002
432	1486	GO:0046293	0.002
433	697	GO:0016254	0.002
434	1514	GO:0046785	0.002
435	308	GO:0005606	0.002
436	979	GO:0031619	0.002
437	2062	GO:2001022	0.002
438	193	GO:0003062	0.002
439	288	GO:0005178	0.002
440	1195	GO:0035539	0.002
441	659	GO:0014013	0.002
442	655	GO:0012501	0.002
443	89	GO:0000836	0.002
444	772	GO:0019211	0.002
445	807	GO:0021612	0.002
446	1359	GO:0043596	0.002
447	1874	GO:0071107	0.002
448	2065	GO:2001038	0.002
449	58	GO:0000492	0.002
450	188	GO:0002764	0.002
451	2063	GO:2001027	0.002
452	37	GO:0000216	0.002
453	743	GO:0017053	0.002
454	363	GO:0006106	0.002
455	1162	GO:0035140	0.002
456	1688	GO:0051726	0.002
457	674	GO:0015327	0.002
458	1266	GO:0042585	0.002
459	1656	GO:0051292	0.002
460	732	GO:0016805	0.002
461	425	GO:0006909	0.002
462	633	GO:0010821	0.002
463	1724	GO:0060044	0.002
464	654	GO:0010997	0.002
465	2057	GO:2000798	0.002
466	356	GO:0005968	0.002
467	366	GO:0006203	0.002
468	1760	GO:0060448	0.002
469	1412	GO:0045347	0.002
470	1731	GO:0060123	0.002
471	2016	GO:2000144	0.002
472	501	GO:0007501	0.002
473	1337	GO:0043422	0.002
474	2077	hsa04110	0.002
475	444	GO:0007033	0.002
476	915	GO:0030857	0.002
477	718	GO:0016573	0.002
478	1609	GO:0050431	0.002
479	56	GO:0000422	0.002
480	322	GO:0005664	0.002
481	976	GO:0031585	0.002
482	1298	GO:0043086	0.002
483	8	GO:0000064	0.002
484	1496	GO:0046600	0.002
485	30	GO:0000159	0.002
486	1268	GO:0042634	0.002
487	1860	GO:0070816	0.002
488	1617	GO:0050713	0.002
489	2024	GO:2000373	0.002
490	957	GO:0031442	0.002
491	2033	GO:2000504	0.002
492	84	GO:0000800	0.002
493	499	GO:0007497	0.002
494	1650	GO:0051247	0.002
495	1625	GO:0050820	0.002
496	847	GO:0030091	0.002
497	537	GO:0008347	0.002
498	351	GO:0005873	0.002
499	1527	GO:0046966	0.002
500	904	GO:0030659	0.002
501	1229	GO:0040038	0.002
502	1801	GO:0060770	0.002
503	1553	GO:0048208	0.002
504	1068	GO:0033128	0.002
505	728	GO:0016604	0.002
506	1714	GO:0055037	0.002
507	1843	GO:0070463	0.002
508	1178	GO:0035329	0.002
509	590	GO:0010159	0.002
510	2049	GO:2000740	0.002
511	1048	GO:0032810	0.002
512	1094	GO:0033593	0.002
513	710	GO:0016505	0.002
514	289	GO:0005198	0.002
515	1051	GO:0032864	0.002
516	1292	GO:0043035	0.002
517	1176	GO:0035312	0.002
518	616	GO:0010625	0.001
519	1427	GO:0045605	0.001
520	1448	GO:0045726	0.001
521	1107	GO:0033690	0.001
522	27	GO:0000132	0.001
523	827	GO:0021897	0.001
524	1882	GO:0071203	0.001
525	1120	GO:0034191	0.001
526	379	GO:0006281	0.001
527	1033	GO:0032461	0.001
528	588	GO:0010046	0.001
529	163	GO:0002072	0.001
530	93	GO:0000939	0.001
531	1128	GO:0034450	0.001
532	184	GO:0002674	0.001
533	1967	GO:0090128	0.001
534	1026	GO:0032357	0.001
535	157	GO:0002011	0.001
536	2010	GO:2000095	0.001
537	1563	GO:0048386	0.001
538	726	GO:0016590	0.001
539	1701	GO:0051908	0.001
540	302	GO:0005579	0.001
541	1710	GO:0052901	0.001
542	900	GO:0030617	0.001
543	890	GO:0030422	0.001
544	15	GO:0000079	0.001
545	908	GO:0030675	0.001
546	1886	GO:0071258	0.001
547	853	GO:0030117	0.001
548	1081	GO:0033261	0.001
549	1390	GO:0045104	0.001
550	602	GO:0010452	0.001
551	1343	GO:0043504	0.001
552	228	GO:0003878	0.001
553	941	GO:0031298	0.001
554	10	GO:0000070	0.001
555	1161	GO:0035117	0.001
556	1263	GO:0042578	0.001
557	1184	GO:0035404	0.001
558	239	GO:0004089	0.001
559	1495	GO:0046592	0.001
560	230	GO:0003887	0.001
561	483	GO:0007219	0.001
562	959	GO:0031492	0.001
563	1750	GO:0060354	0.001
564	395	GO:0006335	0.001
565	164	GO:0002080	0.001
566	751	GO:0017159	0.001
567	927	GO:0031060	0.001
568	734	GO:0016851	0.001
569	742	GO:0017017	0.001
570	1369	GO:0043966	0.001
571	1600	GO:0048857	0.001
572	1689	GO:0051754	0.001
573	2068	GO:2001141	0.001
574	1822	GO:0070087	0.001
575	1906	GO:0071559	0.001
576	1290	GO:0043015	0.001
577	631	GO:0010804	0.001
578	467	GO:0007095	0.001
579	1782	GO:0060693	0.001
580	1400	GO:0045145	0.001
581	1948	GO:0072563	0.001
582	1836	GO:0070324	0.001
583	1531	GO:0046985	0.001
584	70	GO:0000775	0.001
585	960	GO:0031493	0.001
586	1703	GO:0051974	0.001
587	9	GO:0000066	0.001
588	2002	GO:1900625	0.001
589	65	GO:0000724	0.001
590	1741	GO:0060253	0.001
591	725	GO:0016589	0.001
592	1681	GO:0051580	0.001
593	920	GO:0030951	0.001
594	935	GO:0031116	0.001
595	1000	GO:0032093	0.001
596	806	GO:0021569	0.001
597	57	GO:0000444	0.001
598	1145	GO:0034770	0.001
599	1545	GO:0048039	0.001
600	1752	GO:0060379	0.001
601	1442	GO:0045685	0.001
602	294	GO:0005497	0.001
603	687	GO:0015995	0.001
604	254	GO:0004531	0.001
605	1628	GO:0050849	0.001
606	1095	GO:0033594	0.001
607	1112	GO:0033993	0.001
608	140	GO:0001841	0.001
609	82	GO:0000796	0.001
610	1375	GO:0044297	0.001
611	1692	GO:0051788	0.001
612	479	GO:0007160	0.001
613	1834	GO:0070314	0.001
614	1571	GO:0048592	0.001
615	278	GO:0005006	0.001
616	1005	GO:0032142	0.001
617	1915	GO:0071813	0.001
618	1798	GO:0060765	0.001
619	1397	GO:0045132	0.001
620	75	GO:0000783	0.001
621	1809	GO:0061044	0.001
622	71	GO:0000778	0
623	1138	GO:0034676	0
624	1057	GO:0032909	0
625	1884	GO:0071228	0
626	436	GO:0006958	0
627	1498	GO:0046602	0
628	1361	GO:0043618	0
629	1721	GO:0060004	0
630	411	GO:0006501	0
631	346	GO:0005815	0
632	86	GO:0000806	0
633	340	GO:0005793	0
634	245	GO:0004386	0
635	424	GO:0006906	0
636	1978	GO:0090307	0
637	392	GO:0006312	0
638	1813	GO:0061302	0
639	1432	GO:0045646	0
640	1715	GO:0055056	0
641	989	GO:0031901	0
642	686	GO:0015979	0
643	2001	GO:1900218	0
644	949	GO:0031343	0
645	550	GO:0008595	0
646	1846	GO:0070512	0
647	672	GO:0015250	0
648	1806	GO:0060977	0
649	358	GO:0005979	0
650	1381	GO:0044428	0
651	1544	GO:0048024	0
652	515	GO:0008054	0
653	275	GO:0004875	0
654	1217	GO:0036003	0
655	567	GO:0009263	0
656	1517	GO:0046847	0
657	203	GO:0003283	0
658	750	GO:0017145	0
659	463	GO:0007091	0
660	129	GO:0001763	0
661	1300	GO:0043111	0
662	657	GO:0014002	0
663	1568	GO:0048487	0
664	1187	GO:0035491	0
665	606	GO:0010484	0
666	1869	GO:0070969	0
667	691	GO:0016079	0
668	1458	GO:0045786	0
669	350	GO:0005871	0
670	1931	GO:0072144	0
671	774	GO:0019237	0
672	1147	GO:0034968	0
673	1329	GO:0043297	0
674	1746	GO:0060317	0
675	1945	GO:0072365	0
676	420	GO:0006895	0
677	466	GO:0007094	0
678	1675	GO:0051534	0
679	1595	GO:0048821	0
680	1150	GO:0035021	0
681	1662	GO:0051329	0
682	534	GO:0008287	0
683	568	GO:0009267	0
684	433	GO:0006944	0
685	1464	GO:0045842	0
686	1630	GO:0050901	0
687	1409	GO:0045244	0
688	1249	GO:0042405	0
689	19	GO:0000084	0
690	1975	GO:0090240	0
691	506	GO:0007622	0
692	676	GO:0015631	0
693	446	GO:0007044	0
694	1169	GO:0035257	0
695	1821	GO:0070063	0
696	476	GO:0007141	0
697	1722	GO:0060020	0
698	2037	GO:2000612	0
699	1085	GO:0033314	0
700	1944	GO:0072362	0
701	452	GO:0007059	0
702	76	GO:0000784	0
703	1320	GO:0043243	0
704	286	GO:0005173	0
705	269	GO:0004748	0
706	1103	GO:0033629	0
707	1586	GO:0048729	0
708	1611	GO:0050544	0
709	257	GO:0004663	0
710	64	GO:0000723	0
711	1552	GO:0048168	-0.001
712	1096	GO:0033596	-0.001
713	607	GO:0010485	-0.001
714	749	GO:0017137	-0.001
715	1102	GO:0033627	-0.001
716	197	GO:0003180	-0.001
717	85	GO:0000805	-0.001
718	818	GO:0021799	-0.001
719	2015	GO:2000143	-0.001
720	321	GO:0005663	-0.001
721	771	GO:0019208	-0.001
722	271	GO:0004775	-0.001
723	3	GO:0000018	-0.001
724	374	GO:0006266	-0.001
725	1987	GO:0097021	-0.001
726	1684	GO:0051649	-0.001
727	1583	GO:0048713	-0.001
728	1463	GO:0045839	-0.001
729	1716	GO:0055087	-0.001
730	1616	GO:0050688	-0.001
731	221	GO:0003713	-0.001
732	1651	GO:0051256	-0.001
733	133	GO:0001787	-0.001
734	2048	GO:2000737	-0.001
735	1114	GO:0034080	-0.001
736	644	GO:0010925	-0.001
737	2035	GO:2000594	-0.001
738	367	GO:0006226	-0.001
739	551	GO:0008601	-0.001
740	16	GO:0000080	-0.001
741	1411	GO:0045335	-0.001
742	1267	GO:0042598	-0.001
743	2018	GO:2000191	-0.001
744	1363	GO:0043620	-0.001
745	87	GO:0000808	-0.001
746	893	GO:0030500	-0.001
747	123	GO:0001669	-0.001
748	891	GO:0030449	-0.001
749	2040	GO:2000620	-0.001
750	1308	GO:0043148	-0.001
751	354	GO:0005902	-0.001
752	1817	GO:0065004	-0.001
753	689	GO:0016044	-0.001
754	871	GO:0030222	-0.001
755	12	GO:0000075	-0.001
756	1117	GO:0034115	-0.001
757	497	GO:0007422	-0.001
758	1271	GO:0042766	-0.001
759	1638	GO:0051096	-0.001
760	1790	GO:0060744	-0.001
761	561	GO:0008853	-0.001
762	1984	GO:0090402	-0.001
763	939	GO:0031262	-0.001
764	1279	GO:0042953	-0.001
765	307	GO:0005605	-0.001
766	1811	GO:0061146	-0.001
767	1524	GO:0046929	-0.001
768	305	GO:0005588	-0.001
769	974	GO:0031576	-0.001
770	1772	GO:0060596	-0.001
771	1659	GO:0051301	-0.001
772	512	GO:0008047	-0.001
773	1676	GO:0051560	-0.001
774	1481	GO:0045995	-0.001
775	1388	GO:0045069	-0.001
776	376	GO:0006270	-0.001
777	1938	GO:0072284	-0.001
778	1024	GO:0032321	-0.001
779	2032	GO:2000481	-0.001
780	417	GO:0006839	-0.001
781	869	GO:0030220	-0.001
782	439	GO:0006975	-0.001
783	1952	GO:0072659	-0.001
784	1159	GO:0035102	-0.001
785	1620	GO:0050773	-0.001
786	25	GO:0000117	-0.001
787	445	GO:0007041	-0.001
788	1122	GO:0034333	-0.001
789	224	GO:0003777	-0.001
790	242	GO:0004170	-0.001
791	1747	GO:0060318	-0.001
792	865	GO:0030194	-0.001
793	1735	GO:0060209	-0.001
794	72	GO:0000779	-0.001
795	1852	GO:0070560	-0.001
796	1670	GO:0051443	-0.001
797	345	GO:0005811	-0.001
798	1289	GO:0043014	-0.001
799	1254	GO:0042487	-0.001
800	371	GO:0006260	-0.001
801	1214	GO:0035985	-0.001
802	713	GO:0016540	-0.001
803	97	GO:0000978	-0.001
804	1115	GO:0034088	-0.001
805	459	GO:0007080	-0.001
806	434	GO:0006956	-0.001
807	1203	GO:0035690	-0.001
808	291	GO:0005355	-0.001
809	357	GO:0005971	-0.001
810	1999	GO:1900212	-0.001
811	141	GO:0001848	-0.001
812	1160	GO:0035104	-0.001
813	1019	GO:0032290	-0.001
814	42	GO:0000278	-0.001
815	1491	GO:0046426	-0.001
816	1158	GO:0035098	-0.001
817	1090	GO:0033561	-0.002
818	854	GO:0030122	-0.002
819	1707	GO:0051988	-0.002
820	2039	GO:2000617	-0.002
821	1462	GO:0045837	-0.002
822	877	GO:0030284	-0.002
823	856	GO:0030131	-0.002
824	1079	GO:0033205	-0.002
825	1015	GO:0032232	-0.002
826	1181	GO:0035359	-0.002
827	864	GO:0030193	-0.002
828	723	GO:0016584	-0.002
829	1060	GO:0032943	-0.002
830	916	GO:0030870	-0.002
831	241	GO:0004146	-0.002
832	1946	GO:0072368	-0.002
833	154	GO:0001953	-0.002
834	1318	GO:0043231	-0.002
835	1299	GO:0043089	-0.002
836	401	GO:0006351	-0.002
837	1406	GO:0045197	-0.002
838	449	GO:0007051	-0.002
839	1350	GO:0043539	-0.002
840	668	GO:0014912	-0.002
841	1013	GO:0032204	-0.002
842	1927	GO:0072050	-0.002
843	783	GO:0019835	-0.002
844	592	GO:0010212	-0.002
845	1484	GO:0046080	-0.002
846	1215	GO:0035986	-0.002
847	1664	GO:0051382	-0.002
848	1867	GO:0070933	-0.002
849	1004	GO:0032139	-0.002
850	1888	GO:0071279	-0.002
851	1621	GO:0050786	-0.002
852	1745	GO:0060305	-0.002
853	875	GO:0030263	-0.002
854	1389	GO:0045103	-0.002
855	1371	GO:0043997	-0.002
856	306	GO:0005604	-0.002
857	841	GO:0022891	-0.002
858	1230	GO:0042054	-0.002
859	1936	GO:0072221	-0.002
860	456	GO:0007067	-0.002
861	142	GO:0001885	-0.002
862	1336	GO:0043409	-0.002
863	692	GO:0016192	-0.002
864	319	GO:0005658	-0.002
865	1291	GO:0043017	-0.002
866	926	GO:0031058	-0.002
867	263	GO:0004712	-0.002
868	1719	GO:0055105	-0.002
869	34	GO:0000188	-0.002
870	1629	GO:0050872	-0.002
871	735	GO:0016890	-0.002
872	1265	GO:0042584	-0.002
873	83	GO:0000797	-0.002
874	1078	GO:0033193	-0.002
875	1573	GO:0048608	-0.002
876	216	GO:0003691	-0.002
877	1257	GO:0042518	-0.002
878	1307	GO:0043142	-0.002
879	896	GO:0030520	-0.002
880	2054	GO:2000780	-0.002
881	1892	GO:0071335	-0.002
882	885	GO:0030332	-0.002
883	1912	GO:0071778	-0.002
884	1394	GO:0045123	-0.002
885	398	GO:0006344	-0.002
886	1623	GO:0050798	-0.002
887	2104	hsa00100	-0.002
888	1546	GO:0048096	-0.002
889	1001	GO:0032095	-0.002
890	715	GO:0016570	-0.002
891	1222	GO:0039003	-0.002
892	608	GO:0010506	-0.002
893	299	GO:0005534	-0.002
894	62	GO:0000712	-0.002
895	1764	GO:0060528	-0.002
896	1737	GO:0060217	-0.002
897	1076	GO:0033182	-0.002
898	1008	GO:0032154	-0.002
899	704	GO:0016447	-0.002
900	913	GO:0030845	-0.002
901	1808	GO:0061029	-0.002
902	523	GO:0008209	-0.002
903	105	GO:0001042	-0.002
904	1132	GO:0034501	-0.002
905	343	GO:0005801	-0.002
906	2021	GO:2000276	-0.002
907	1794	GO:0060750	-0.002
908	1551	GO:0048147	-0.002
909	1231	GO:0042058	-0.002
910	1461	GO:0045799	-0.002
911	274	GO:0004869	-0.002
912	1497	GO:0046601	-0.002
913	1416	GO:0045446	-0.002
914	717	GO:0016572	-0.002
915	906	GO:0030667	-0.002
916	46	GO:0000302	-0.002
917	314	GO:0005635	-0.003
918	978	GO:0031616	-0.003
919	1627	GO:0050847	-0.003
920	652	GO:0010991	-0.003
921	794	GO:0019905	-0.003
922	472	GO:0007113	-0.003
923	68	GO:0000733	-0.003
924	1818	GO:0070022	-0.003
925	458	GO:0007079	-0.003
926	327	GO:0005697	-0.003
927	198	GO:0003197	-0.003
928	1027	GO:0032403	-0.003
929	981	GO:0031627	-0.003
930	1940	GO:0072305	-0.003
931	681	GO:0015840	-0.003
932	1612	GO:0050658	-0.003
933	736	GO:0016891	-0.003
934	921	GO:0030953	-0.003
935	2056	GO:2000793	-0.003
936	721	GO:0016580	-0.003
937	938	GO:0031232	-0.003
938	788	GO:0019898	-0.003
939	1557	GO:0048257	-0.003
940	1751	GO:0060375	-0.003
941	642	GO:0010920	-0.003
942	1848	GO:0070531	-0.003
943	204	GO:0003289	-0.003
944	986	GO:0031669	-0.003
945	964	GO:0031519	-0.003
946	536	GO:0008340	-0.003
947	1223	GO:0039535	-0.003
948	1208	GO:0035854	-0.003
949	214	GO:0003689	-0.003
950	2014	GO:2000134	-0.003
951	963	GO:0031508	-0.003
952	1428	GO:0045616	-0.003
953	1391	GO:0045109	-0.003
954	1431	GO:0045638	-0.003
955	311	GO:0005610	-0.003
956	261	GO:0004693	-0.003
957	1622	GO:0050793	-0.003
958	435	GO:0006957	-0.003
959	457	GO:0007076	-0.003
960	1101	GO:0033619	-0.003
961	1149	GO:0035020	-0.003
962	2058	GO:2000802	-0.003
963	1510	GO:0046683	-0.003
964	1539	GO:0047485	-0.003
965	180	GO:0002576	-0.003
966	961	GO:0031497	-0.003
967	2000	GO:1900215	-0.003
968	22	GO:0000088	-0.003
969	1021	GO:0032301	-0.003
970	1316	GO:0043219	-0.003
971	975	GO:0031581	-0.003
972	2025	GO:2000377	-0.003
973	1454	GO:0045749	-0.003
974	1682	GO:0051595	-0.003
975	487	GO:0007258	-0.003
976	1654	GO:0051276	-0.003
977	1930	GO:0072138	-0.003
978	930	GO:0031092	-0.003
979	1830	GO:0070266	-0.003
980	1303	GO:0043125	-0.003
981	1658	GO:0051299	-0.003
982	1845	GO:0070508	-0.003
983	1255	GO:0042490	-0.003
984	572	GO:0009411	-0.003
985	1968	GO:0090136	-0.003
986	1570	GO:0048589	-0.003
987	968	GO:0031529	-0.003
988	1528	GO:0046969	-0.003
989	1326	GO:0043277	-0.003
990	21	GO:0000087	-0.003
991	293	GO:0005496	-0.003
992	690	GO:0016050	-0.003
993	1077	GO:0033186	-0.003
994	1738	GO:0060218	-0.003
995	1895	GO:0071383	-0.003
996	1106	GO:0033674	-0.003
997	1154	GO:0035051	-0.003
998	450	GO:0007052	-0.003
999	1883	GO:0071218	-0.003
1000	419	GO:0006892	-0.003
1001	1067	GO:0033088	-0.003
1002	746	GO:0017108	-0.003
1003	313	GO:0005634	-0.003
1004	648	GO:0010966	-0.003
1005	2081	hsa04610	-0.003
1006	2012	GO:2000116	-0.003
1007	171	GO:0002244	-0.003
1008	1006	GO:0032143	-0.003
1009	103	GO:0001010	-0.003
1010	820	GO:0021846	-0.003
1011	303	GO:0005581	-0.003
1012	996	GO:0032025	-0.003
1013	675	GO:0015630	-0.003
1014	1807	GO:0060980	-0.003
1015	1373	GO:0044154	-0.004
1016	1209	GO:0035855	-0.003
1017	1032	GO:0032444	-0.004
1018	325	GO:0005678	-0.004
1019	1177	GO:0035313	-0.004
1020	1445	GO:0045715	-0.004
1021	1694	GO:0051865	-0.004
1022	454	GO:0007063	-0.004
1023	575	GO:0009649	-0.004
1024	1434	GO:0045656	-0.004
1025	744	GO:0017055	-0.004
1026	1466	GO:0045859	-0.004
1027	377	GO:0006271	-0.004
1028	991	GO:0031952	-0.004
1029	873	GO:0030235	-0.004
1030	1075	GO:0033169	-0.004
1031	1088	GO:0033557	-0.004
1032	1634	GO:0051019	-0.004
1033	2079	hsa04710	-0.004
1034	2030	GO:2000467	-0.004
1035	934	GO:0031115	-0.004
1036	69	GO:0000739	-0.004
1037	585	GO:0010008	-0.004
1038	972	GO:0031573	-0.004
1039	1824	GO:0070173	-0.004
1040	967	GO:0031528	-0.004
1041	1925	GO:0072017	-0.004
1042	758	GO:0018024	-0.004
1043	268	GO:0004722	-0.004
1044	903	GO:0030658	-0.004
1045	1768	GO:0060565	-0.004
1046	876	GO:0030277	-0.004
1047	782	GO:0019827	-0.004
1048	787	GO:0019897	-0.004
1049	1089	GO:0033558	-0.004
1050	518	GO:0008090	-0.004
1051	1246	GO:0042325	-0.004
1052	451	GO:0007057	-0.004
1053	1080	GO:0033235	-0.004
1054	276	GO:0004882	-0.004
1055	320	GO:0005662	-0.004
1056	175	GO:0002430	-0.004
1057	2095	hsa04114	-0.004
1058	826	GO:0021895	-0.004
1059	1168	GO:0035234	-0.004
1060	102	GO:0000988	-0.004
1061	2082	hsa03030	-0.004
1062	1663	GO:0051345	-0.004
1063	2102	hsa05222	-0.004
1064	907	GO:0030674	-0.004
1065	589	GO:0010070	-0.004
1066	1395	GO:0045124	-0.004
1067	1137	GO:0034648	-0.004
1068	784	GO:0019836	-0.004
1069	1483	GO:0046078	-0.004
1070	74	GO:0000781	-0.004
1071	2026	GO:2000378	-0.004
1072	605	GO:0010469	-0.004
1073	1784	GO:0060706	-0.004
1074	1558	GO:0048261	-0.004
1075	1960	GO:0090007	-0.004
1076	1251	GO:0042470	-0.004
1077	1636	GO:0051054	-0.004
1078	703	GO:0016446	-0.004
1079	1849	GO:0070534	-0.004
1080	1850	GO:0070542	-0.004
1081	1023	GO:0032318	-0.004
1082	11	GO:0000072	-0.004
1083	1070	GO:0033137	-0.004
1084	186	GO:0002740	-0.004
1085	1063	GO:0032993	-0.004
1086	956	GO:0031441	-0.004
1087	117	GO:0001556	-0.004
1088	2022	GO:2000342	-0.004
1089	2	GO:0000014	-0.004
1090	1045	GO:0032801	-0.004
1091	1904	GO:0071480	-0.004
1092	468	GO:0007096	-0.004
1093	1603	GO:0048863	-0.004
1094	341	GO:0005794	-0.004
1095	387	GO:0006302	-0.004
1096	1859	GO:0070742	-0.004
1097	1649	GO:0051233	-0.004
1098	2052	GO:2000774	-0.004
1099	272	GO:0004799	-0.004
1100	574	GO:0009629	-0.004
1101	709	GO:0016504	-0.004
1102	461	GO:0007089	-0.004
1103	1686	GO:0051668	-0.004
1104	443	GO:0007019	-0.004
1105	857	GO:0030136	-0.005
1106	789	GO:0019899	-0.004
1107	80	GO:0000793	-0.005
1108	950	GO:0031345	-0.005
1109	1017	GO:0032275	-0.005
1110	1954	GO:0072686	-0.005
1111	738	GO:0016925	-0.005
1112	1810	GO:0061045	-0.005
1113	24	GO:0000090	-0.005
1114	1304	GO:0043130	-0.005
1115	1437	GO:0045664	-0.005
1116	119	GO:0001578	-0.005
1117	1905	GO:0071535	-0.005
1118	393	GO:0006325	-0.005
1119	60	GO:0000701	-0.005
1120	1753	GO:0060389	-0.005
1121	1053	GO:0032873	-0.005
1122	1407	GO:0045198	-0.005
1123	4	GO:0000019	-0.005
1124	29	GO:0000150	-0.005
1125	368	GO:0006231	-0.005
1126	1666	GO:0051400	-0.005
1127	1989	GO:0097067	-0.005
1128	251	GO:0004520	-0.005
1129	646	GO:0010944	-0.005
1130	372	GO:0006261	-0.005
1131	431	GO:0006922	-0.005
1132	283	GO:0005112	-0.005
1133	1242	GO:0042221	-0.005
1134	1680	GO:0051575	-0.005
1135	1804	GO:0060900	-0.005
1136	1087	GO:0033504	-0.005
1137	1505	GO:0046661	-0.005
1138	1594	GO:0048813	-0.005
1139	2107	hsa04120	-0.005
1140	1858	GO:0070734	-0.005
1141	1465	GO:0045843	-0.005
1142	1401	GO:0045171	-0.005
1143	2103	hsa05150	-0.005
1144	1671	GO:0051444	-0.005
1145	437	GO:0006970	-0.005
1146	636	GO:0010832	-0.005
1147	565	GO:0009157	-0.005
1148	1366	GO:0043653	-0.005
1149	2013	GO:2000121	-0.005
1150	1518	GO:0046884	-0.005
1151	383	GO:0006288	-0.005
1152	1360	GO:0043610	-0.005
1153	90	GO:0000910	-0.005
1154	824	GO:0021879	-0.005
1155	136	GO:0001832	-0.005
1156	858	GO:0030139	-0.005
1157	1260	GO:0042551	-0.005
1158	1295	GO:0043067	-0.005
1159	355	GO:0005905	-0.005
1160	566	GO:0009186	-0.005
1161	1020	GO:0032298	-0.005
1162	2011	GO:2000098	-0.005
1163	1443	GO:0045687	-0.005
1164	1565	GO:0048477	-0.005
1165	700	GO:0016323	-0.005
1166	769	GO:0019088	-0.005
1167	693	GO:0016202	-0.005
1168	729	GO:0016605	-0.005
1169	1421	GO:0045542	-0.005
1170	609	GO:0010521	-0.005
1171	966	GO:0031527	-0.005
1172	1364	GO:0043626	-0.005
1173	252	GO:0004523	-0.005
1174	639	GO:0010842	-0.005
1175	1976	GO:0090267	-0.005
1176	779	GO:0019724	-0.005
1177	1141	GO:0034720	-0.005
1178	1436	GO:0045663	-0.005
1179	250	GO:0004518	-0.005
1180	2036	GO:2000597	-0.005
1181	1212	GO:0035970	-0.005
1182	1791	GO:0060745	-0.005
1183	470	GO:0007100	-0.005
1184	187	GO:0002763	-0.005
1185	868	GO:0030219	-0.005
1186	213	GO:0003688	-0.005
1187	799	GO:0021522	-0.005
1188	733	GO:0016818	-0.005
1189	839	GO:0022614	-0.005
1190	210	GO:0003680	-0.005
1191	539	GO:0008408	-0.005
1192	1842	GO:0070438	-0.005
1193	421	GO:0006897	-0.006
1194	899	GO:0030616	-0.006
1195	1414	GO:0045444	-0.006
1196	326	GO:0005694	-0.006
1197	35	GO:0000212	-0.006
1198	1296	GO:0043069	-0.006
1199	1098	GO:0033600	-0.006
1200	1104	GO:0033631	-0.006
1201	1997	GO:1900116	-0.006
1202	53	GO:0000404	-0.006
1203	284	GO:0005114	-0.006
1204	781	GO:0019789	-0.006
1205	965	GO:0031523	-0.006
1206	1815	GO:0061360	-0.006
1207	629	GO:0010792	-0.006
1208	312	GO:0005626	-0.006
1209	112	GO:0001103	-0.006
1210	1582	GO:0048712	-0.006
1211	1996	GO:1900103	-0.006
1212	612	GO:0010569	-0.006
1213	1802	GO:0060789	-0.006
1214	998	GO:0032077	-0.006
1215	1258	GO:0042524	-0.006
1216	860	GO:0030145	-0.006
1217	1839	GO:0070410	-0.006
1218	114	GO:0001300	-0.006
1219	447	GO:0007049	-0.006
1220	1309	GO:0043153	-0.006
1221	1127	GO:0034446	-0.006
1222	394	GO:0006333	-0.006
1223	2092	hsa03450	-0.006
1224	983	GO:0031647	-0.006
1225	486	GO:0007229	-0.006
1226	809	GO:0021650	-0.006
1227	364	GO:0006109	-0.006
1228	81	GO:0000794	-0.006
1229	280	GO:0005070	-0.006
1230	2094	hsa04330	-0.006
1231	653	GO:0010994	-0.006
1232	1575	GO:0048642	-0.006
1233	1702	GO:0051918	-0.006
1234	238	GO:0004003	-0.006
1235	1774	GO:0060599	-0.006
1236	1543	GO:0048019	-0.006
1237	1705	GO:0051984	-0.006
1238	1584	GO:0048714	-0.006
1239	1362	GO:0043619	-0.006
1240	390	GO:0006310	-0.006
1241	909	GO:0030690	-0.006
1242	851	GO:0030100	-0.006
1243	953	GO:0031410	-0.006
1244	1472	GO:0045910	-0.006
1245	1592	GO:0048793	-0.006
1246	1559	GO:0048273	-0.006
1247	107	GO:0001047	-0.006
1248	843	GO:0023035	-0.006
1249	1876	GO:0071156	-0.006
1250	316	GO:0005652	-0.006
1251	485	GO:0007221	-0.006
1252	315	GO:0005637	-0.006
1253	1018	GO:0032288	-0.007
1254	795	GO:0019953	-0.007
1255	714	GO:0016568	-0.007
1256	1499	GO:0046620	-0.007
1257	611	GO:0010559	-0.007
1258	124	GO:0001673	-0.007
1259	808	GO:0021633	-0.007
1260	1285	GO:0042993	-0.007
1261	1228	GO:0040020	-0.007
1262	540	GO:0008409	-0.007
1263	770	GO:0019102	-0.007
1264	1827	GO:0070215	-0.007
1265	1655	GO:0051280	-0.007
1266	1880	GO:0071173	-0.007
1267	1672	GO:0051488	-0.007
1268	1723	GO:0060039	-0.007
1269	637	GO:0010834	-0.007
1270	557	GO:0008635	-0.007
1271	711	GO:0016514	-0.007
1272	803	GO:0021533	-0.007
1273	1031	GO:0032436	-0.007
1274	1911	GO:0071777	-0.007
1275	1429	GO:0045618	-0.007
1276	645	GO:0010940	-0.007
1277	1277	GO:0042826	-0.007
1278	1733	GO:0060166	-0.007
1279	347	GO:0005819	-0.007
1280	1979	GO:0090343	-0.007
1281	940	GO:0031297	-0.007
1282	128	GO:0001755	-0.007
1283	1396	GO:0045128	-0.007
1284	832	GO:0021987	-0.007
1285	1002	GO:0032133	-0.007
1286	661	GO:0014040	-0.007
1287	262	GO:0004709	-0.007
1288	884	GO:0030331	-0.007
1289	1756	GO:0060394	-0.007
1290	1003	GO:0032137	-0.007
1291	338	GO:0005770	-0.007
1292	828	GO:0021915	-0.007
1293	1761	GO:0060520	-0.007
1294	603	GO:0010458	-0.007
1295	1602	GO:0048859	-0.007
1296	1604	GO:0048870	-0.007
1297	705	GO:0016458	-0.007
1298	1306	GO:0043140	-0.007
1299	627	GO:0010757	-0.007
1300	1771	GO:0060576	-0.007
1301	1704	GO:0051983	-0.007
1302	1698	GO:0051893	-0.007
1303	1770	GO:0060574	-0.007
1304	150	GO:0001939	-0.007
1305	1797	GO:0060762	-0.007
1306	1935	GO:0072189	-0.007
1307	475	GO:0007131	-0.007
1308	716	GO:0016571	-0.007
1309	336	GO:0005768	-0.007
1310	170	GO:0002204	-0.007
1311	1943	GO:0072332	-0.007
1312	1881	GO:0071174	-0.007
1313	650	GO:0010975	-0.007
1314	894	GO:0030511	-0.007
1315	109	GO:0001078	-0.007
1316	1166	GO:0035189	-0.008
1317	1049	GO:0032835	-0.008
1318	23	GO:0000089	-0.008
1319	1587	GO:0048730	-0.008
1320	817	GO:0021795	-0.008
1321	1029	GO:0032418	-0.008
1322	391	GO:0006311	-0.008
1323	1965	GO:0090102	-0.008
1324	13	GO:0000076	-0.008
1325	1202	GO:0035631	-0.008
1326	1678	GO:0051573	-0.008
1327	1597	GO:0048844	-0.008
1328	54	GO:0000405	-0.008
1329	1871	GO:0070974	-0.008
1330	2047	GO:2000726	-0.008
1331	282	GO:0005080	-0.008
1332	381	GO:0006284	-0.008
1333	1234	GO:0042063	-0.008
1334	1066	GO:0033034	-0.008
1335	162	GO:0002064	-0.008
1336	115	GO:0001309	-0.008
1337	67	GO:0000731	-0.008
1338	1593	GO:0048812	-0.008
1339	1345	GO:0043518	-0.008
1340	1036	GO:0032508	-0.008
1341	838	GO:0022409	-0.008
1342	1274	GO:0042789	-0.008
1343	52	GO:0000403	-0.008
1344	1878	GO:0071158	-0.008
1345	2044	GO:2000679	-0.008
1346	1355	GO:0043566	-0.008
1347	994	GO:0031965	-0.008
1348	866	GO:0030195	-0.008
1349	1014	GO:0032214	-0.008
1350	1757	GO:0060433	-0.008
1351	748	GO:0017136	-0.008
1352	613	GO:0010592	-0.008
1353	1440	GO:0045670	-0.008
1354	1933	GO:0072177	-0.008
1355	490	GO:0007346	-0.008
1356	406	GO:0006461	-0.008
1357	1126	GO:0034405	-0.008
1358	576	GO:0009791	-0.008
1359	369	GO:0006235	-0.008
1360	1174	GO:0035307	-0.008
1361	1207	GO:0035799	-0.008
1362	2075	hsa03410	-0.008
1363	1447	GO:0045720	-0.008
1364	635	GO:0010826	-0.008
1365	1907	GO:0071639	-0.008
1366	209	GO:0003678	-0.008
1367	1151	GO:0035033	-0.008
1368	1693	GO:0051797	-0.008
1369	1803	GO:0060804	-0.008
1370	1961	GO:0090051	-0.008
1371	1687	GO:0051721	-0.008
1372	888	GO:0030337	-0.008
1373	1358	GO:0043588	-0.008
1374	220	GO:0003712	-0.008
1375	762	GO:0018205	-0.008
1376	32	GO:0000183	-0.008
1377	785	GO:0019838	-0.008
1378	521	GO:0008160	-0.009
1379	595	GO:0010225	-0.009
1380	1777	GO:0060662	-0.009
1381	849	GO:0030098	-0.009
1382	1665	GO:0051388	-0.009
1383	1280	GO:0042975	-0.009
1384	1135	GO:0034616	-0.009
1385	477	GO:0007144	-0.009
1386	1762	GO:0060523	-0.009
1387	1988	GO:0097039	-0.009
1388	222	GO:0003714	-0.009
1389	797	GO:0021510	-0.009
1390	1926	GO:0072044	-0.009
1391	924	GO:0031053	-0.009
1392	400	GO:0006349	-0.009
1393	1690	GO:0051782	-0.009
1394	1022	GO:0032302	-0.009
1395	1204	GO:0035748	-0.009
1396	329	GO:0005720	-0.009
1397	2055	GO:2000781	-0.009
1398	1958	GO:0085029	-0.009
1399	484	GO:0007220	-0.009
1400	1605	GO:0048873	-0.009
1401	1453	GO:0045742	-0.009
1402	804	GO:0021537	-0.009
1403	593	GO:0010216	-0.009
1404	1069	GO:0033129	-0.009
1405	1512	GO:0046688	-0.009
1406	538	GO:0008354	-0.009
1407	1913	GO:0071797	-0.009
1408	954	GO:0031434	-0.009
1409	55	GO:0000406	-0.009
1410	1875	GO:0071141	-0.009
1411	1641	GO:0051101	-0.009
1412	1578	GO:0048678	-0.009
1413	1923	GO:0071930	-0.009
1414	1893	GO:0071353	-0.009
1415	352	GO:0005876	-0.009
1416	337	GO:0005769	-0.009
1417	1444	GO:0045713	-0.009
1418	462	GO:0007090	-0.009
1419	1862	GO:0070836	-0.009
1420	1009	GO:0032181	-0.009
1421	495	GO:0007406	-0.009
1422	403	GO:0006355	-0.009
1423	1314	GO:0043200	-0.009
1424	643	GO:0010922	-0.009
1425	1639	GO:0051097	-0.009
1426	1404	GO:0045180	-0.009
1427	1501	GO:0046628	-0.009
1428	1438	GO:0045665	-0.009
1429	1305	GO:0043137	-0.009
1430	1934	GO:0072179	-0.009
1431	834	GO:0022011	-0.01
1432	1012	GO:0032203	-0.01
1433	1232	GO:0042059	-0.01
1434	2088	hsa03440	-0.01
1435	1780	GO:0060685	-0.01
1436	1726	GO:0060055	-0.01
1437	901	GO:0030618	-0.01
1438	388	GO:0006303	-0.01
1439	1619	GO:0050767	-0.01
1440	151	GO:0001940	-0.01
1441	1270	GO:0042641	-0.01
1442	1059	GO:0032922	-0.01
1443	2069	GO:2001220	-0.01
1444	1951	GO:0072602	-0.01
1445	116	GO:0001547	-0.01
1446	63	GO:0000722	-0.01
1447	1410	GO:0045295	-0.01
1448	277	GO:0004955	-0.01
1449	1699	GO:0051895	-0.01
1450	883	GO:0030330	-0.01
1451	1356	GO:0043570	-0.01
1452	1992	GO:0097150	-0.01
1453	1011	GO:0032201	-0.01
1454	2051	GO:2000773	-0.01
1455	2009	GO:2000060	-0.01
1456	1763	GO:0060527	-0.01
1457	259	GO:0004674	-0.01
1458	1840	GO:0070411	-0.01
1459	1598	GO:0048853	-0.01
1460	1487	GO:0046329	-0.01
1461	1697	GO:0051881	-0.01
1462	1644	GO:0051152	-0.01
1463	1964	GO:0090096	-0.01
1464	1058	GO:0032916	-0.01
1465	169	GO:0002193	-0.01
1466	332	GO:0005726	-0.01
1467	478	GO:0007155	-0.01
1468	1083	GO:0033267	-0.01
1469	324	GO:0005677	-0.01
1470	66	GO:0000730	-0.01
1471	1896	GO:0071391	-0.01
1472	1052	GO:0032869	-0.01
1473	1140	GO:0034714	-0.01
1474	1922	GO:0071922	-0.01
1475	582	GO:0009925	-0.01
1476	641	GO:0010870	-0.01
1477	982	GO:0031641	-0.011
1478	1302	GO:0043124	-0.011
1479	1783	GO:0060694	-0.011
1480	1732	GO:0060157	-0.011
1481	1647	GO:0051219	-0.011
1482	1418	GO:0045475	-0.011
1483	724	GO:0016585	-0.011
1484	1929	GO:0072134	-0.011
1485	1947	GO:0072428	-0.011
1486	610	GO:0010544	-0.011
1487	1736	GO:0060216	-0.011
1488	1379	GO:0044346	-0.011
1489	1056	GO:0032886	-0.011
1490	200	GO:0003219	-0.011
1491	1093	GO:0033591	-0.011
1492	591	GO:0010165	-0.011
1493	651	GO:0010976	-0.011
1494	182	GO:0002651	-0.011
1495	1556	GO:0048256	-0.011
1496	897	GO:0030521	-0.011
1497	830	GO:0021978	-0.011
1498	1074	GO:0033158	-0.011
1499	1814	GO:0061309	-0.011
1500	1	GO:0000012	-0.011
1501	2004	GO:2000017	-0.011
1502	440	GO:0006978	-0.011
1503	842	GO:0023014	-0.011
1504	666	GO:0014740	-0.011
1505	183	GO:0002663	-0.011
1506	741	GO:0017015	-0.011
1507	1792	GO:0060748	-0.011
1508	1353	GO:0043564	-0.011
1509	2091	hsa03430	-0.011
1510	1877	GO:0071157	-0.011
1511	1572	GO:0048593	-0.011
1512	1624	GO:0050815	-0.011
1513	1674	GO:0051496	-0.011
1514	958	GO:0031490	-0.011
1515	562	GO:0009008	-0.011
1516	1386	GO:0045023	-0.011
1517	511	GO:0008045	-0.011
1518	1759	GO:0060443	-0.011
1519	1508	GO:0046677	-0.011
1520	2061	GO:2000974	-0.011
1521	40	GO:0000228	-0.011
1522	1196	GO:0035566	-0.012
1523	1653	GO:0051272	-0.012
1524	399	GO:0006346	-0.012
1525	1928	GO:0072133	-0.012
1526	922	GO:0030971	-0.012
1527	492	GO:0007398	-0.012
1528	988	GO:0031798	-0.012
1529	104	GO:0001012	-0.012
1530	1696	GO:0051880	-0.012
1531	1288	GO:0043009	-0.012
1532	217	GO:0003696	-0.012
1533	1488	GO:0046332	-0.012
1534	802	GO:0021530	-0.012
1535	317	GO:0005654	-0.012
1536	1548	GO:0048103	-0.012
1537	947	GO:0031334	-0.012
1538	1121	GO:0034244	-0.012
1539	384	GO:0006297	-0.012
1540	130	GO:0001764	-0.012
1541	1673	GO:0051493	-0.012
1542	223	GO:0003721	-0.012
1543	2099	hsa05020	-0.012
1544	464	GO:0007092	-0.012
1545	1645	GO:0051154	-0.012
1546	295	GO:0005507	-0.012
1547	952	GO:0031398	-0.012
1548	1580	GO:0048709	-0.012
1549	330	GO:0005721	-0.012
1550	1219	GO:0038028	-0.012
1551	247	GO:0004468	-0.012
1552	160	GO:0002040	-0.012
1553	1220	GO:0038052	-0.012
1554	1061	GO:0032967	-0.012
1555	432	GO:0006927	-0.012
1556	1812	GO:0061198	-0.012
1557	1433	GO:0045648	-0.012
1558	1819	GO:0070034	-0.012
1559	1855	GO:0070668	-0.012
1560	212	GO:0003684	-0.012
1561	1328	GO:0043281	-0.012
1562	1847	GO:0070527	-0.012
1563	494	GO:0007403	-0.012
1564	237	GO:0003964	-0.012
1565	1225	GO:0040009	-0.013
1566	1459	GO:0045792	-0.013
1567	1941	GO:0072307	-0.013
1568	1118	GO:0034116	-0.013
1569	442	GO:0007004	-0.013
1570	143	GO:0001889	-0.013
1571	1695	GO:0051879	-0.013
1572	1643	GO:0051150	-0.013
1573	1755	GO:0060391	-0.013
1574	189	GO:0002821	-0.013
1575	556	GO:0008634	-0.013
1576	51	GO:0000400	-0.013
1577	1357	GO:0043586	-0.013
1578	840	GO:0022616	-0.013
1579	1908	GO:0071681	-0.013
1580	833	GO:0022008	-0.013
1581	328	GO:0005719	-0.013
1582	1564	GO:0048471	-0.013
1583	172	GO:0002248	-0.013
1584	1985	GO:0090403	-0.013
1585	199	GO:0003203	-0.013
1586	1248	GO:0042393	-0.013
1587	1891	GO:0071310	-0.013
1588	190	GO:0002904	-0.013
1589	1615	GO:0050681	-0.013
1590	1599	GO:0048854	-0.013
1591	279	GO:0005026	-0.013
1592	594	GO:0010224	-0.013
1593	531	GO:0008283	-0.013
1594	178	GO:0002520	-0.013
1595	1744	GO:0060291	-0.013
1596	1769	GO:0060571	-0.013
1597	1668	GO:0051403	-0.013
1598	1920	GO:0071899	-0.013
1599	205	GO:0003290	-0.013
1600	1530	GO:0046983	-0.013
1601	1800	GO:0060768	-0.013
1602	409	GO:0006476	-0.013
1603	1500	GO:0046627	-0.013
1604	1243	GO:0042246	-0.014
1605	218	GO:0003697	-0.013
1606	790	GO:0019900	-0.013
1607	599	GO:0010369	-0.014
1608	626	GO:0010742	-0.014
1609	253	GO:0004525	-0.014
1610	132	GO:0001783	-0.014
1611	658	GO:0014010	-0.014
1612	441	GO:0006979	-0.014
1613	1065	GO:0033026	-0.014
1614	285	GO:0005160	-0.014
1615	1828	GO:0070245	-0.014
1616	1585	GO:0048715	-0.014
1617	2100	hsa04914	-0.014
1618	969	GO:0031536	-0.014
1619	945	GO:0031324	-0.014
1620	179	GO:0002521	-0.014
1621	1405	GO:0045190	-0.014
1622	146	GO:0001932	-0.014
1623	1185	GO:0035407	-0.014
1624	1837	GO:0070372	-0.014
1625	997	GO:0032071	-0.014
1626	1727	GO:0060056	-0.014
1627	1844	GO:0070487	-0.014
1628	145	GO:0001892	-0.014
1629	535	GO:0008327	-0.014
1630	1562	GO:0048340	-0.014
1631	77	GO:0000785	-0.014
1632	1900	GO:0071455	-0.014
1633	99	GO:0000980	-0.014
1634	489	GO:0007281	-0.014
1635	872	GO:0030223	-0.014
1636	558	GO:0008637	-0.014
1637	1183	GO:0035402	-0.014
1638	2059	GO:2000811	-0.014
1639	349	GO:0005829	-0.014
1640	396	GO:0006338	-0.014
1641	1511	GO:0046686	-0.014
1642	985	GO:0031659	-0.014
1643	500	GO:0007500	-0.014
1644	298	GO:0005524	-0.014
1645	1728	GO:0060065	-0.014
1646	984	GO:0031648	-0.014
1647	861	GO:0030155	-0.014
1648	318	GO:0005657	-0.014
1649	1788	GO:0060742	-0.014
1650	158	GO:0002020	-0.014
1651	993	GO:0031954	-0.015
1652	1851	GO:0070557	-0.015
1653	836	GO:0022037	-0.015
1654	914	GO:0030850	-0.015
1655	96	GO:0000977	-0.015
1656	505	GO:0007596	-0.015
1657	429	GO:0006919	-0.015
1658	1413	GO:0045408	-0.015
1659	1348	GO:0043535	-0.015
1660	1799	GO:0060766	-0.015
1661	1091	GO:0033574	-0.015
1662	1460	GO:0045793	-0.015
1663	1125	GO:0034394	-0.015
1664	1983	GO:0090400	-0.015
1665	519	GO:0008134	-0.015
1666	1919	GO:0071895	-0.015
1667	47	GO:0000307	-0.015
1668	1902	GO:0071459	-0.015
1669	1170	GO:0035259	-0.015
1670	2083	hsa04144	-0.015
1671	385	GO:0006298	-0.015
1672	815	GO:0021766	-0.015
1673	1866	GO:0070932	-0.015
1674	1918	GO:0071866	-0.015
1675	1016	GO:0032270	-0.015
1676	1352	GO:0043550	-0.015
1677	135	GO:0001829	-0.015
1678	110	GO:0001085	-0.015
1679	1139	GO:0034713	-0.015
1680	2067	GO:2001054	-0.015
1681	763	GO:0018393	-0.015
1682	1591	GO:0048762	-0.016
1683	837	GO:0022408	-0.016
1684	1525	GO:0046930	-0.016
1685	1758	GO:0060440	-0.016
1686	1980	GO:0090344	-0.016
1687	699	GO:0016310	-0.016
1688	1099	GO:0033601	-0.016
1689	2072	GO:2001244	-0.016
1690	208	GO:0003677	-0.016
1691	1368	GO:0043923	-0.016
1692	482	GO:0007183	-0.016
1693	1426	GO:0045603	-0.016
1694	149	GO:0001937	-0.016
1695	583	GO:0009986	-0.016
1696	937	GO:0031175	-0.016
1697	1152	GO:0035035	-0.016
1698	126	GO:0001709	-0.016
1699	1962	GO:0090068	-0.016
1700	581	GO:0009913	-0.016
1701	992	GO:0031953	-0.016
1702	1233	GO:0042060	-0.016
1703	1479	GO:0045950	-0.016
1704	1971	GO:0090200	-0.016
1705	1435	GO:0045662	-0.016
1706	1372	GO:0044029	-0.016
1707	101	GO:0000987	-0.017
1708	48	GO:0000320	-0.017
1709	430	GO:0006921	-0.017
1710	1734	GO:0060177	-0.017
1711	1422	GO:0045595	-0.017
1712	554	GO:0008630	-0.017
1713	144	GO:0001890	-0.017
1714	1990	GO:0097136	-0.017
1715	2042	GO:2000653	-0.017
1716	1163	GO:0035162	-0.017
1717	1567	GO:0048485	-0.017
1718	78	GO:0000790	-0.017
1719	1776	GO:0060644	-0.017
1720	1781	GO:0060687	-0.017
1721	1452	GO:0045739	-0.017
1722	848	GO:0030097	-0.017
1723	1786	GO:0060736	-0.017
1724	999	GO:0032091	-0.017
1725	1956	GO:0080134	-0.017
1726	946	GO:0031333	-0.017
1727	1273	GO:0042771	-0.017
1728	1473	GO:0045918	-0.017
1729	1475	GO:0045931	-0.017
1730	79	GO:0000792	-0.017
1731	886	GO:0030334	-0.018
1732	1272	GO:0042770	-0.018
1733	153	GO:0001952	-0.018
1734	1581	GO:0048711	-0.018
1735	1982	GO:0090399	-0.018
1736	1730	GO:0060074	-0.018
1737	147	GO:0001933	-0.018
1738	1981	GO:0090398	-0.018
1739	1451	GO:0045737	-0.018
1740	1269	GO:0042640	-0.018
1741	919	GO:0030949	-0.018
1742	1640	GO:0051098	-0.018
1743	850	GO:0030099	-0.018
1744	1579	GO:0048701	-0.018
1745	1515	GO:0046825	-0.018
1746	1180	GO:0035358	-0.018
1747	1618	GO:0050714	-0.018
1748	584	GO:0010001	-0.018
1749	353	GO:0005901	-0.018
1750	951	GO:0031393	-0.018
1751	867	GO:0030216	-0.018
1752	831	GO:0021983	-0.018
1753	596	GO:0010248	-0.018
1754	508	GO:0008022	-0.019
1755	100	GO:0000981	-0.019
1756	970	GO:0031571	-0.019
1757	397	GO:0006343	-0.019
1758	805	GO:0021551	-0.019
1759	2085	hsa04510	-0.019
1760	1380	GO:0044419	-0.019
1761	1062	GO:0032976	-0.019
1762	1188	GO:0035497	-0.019
1763	698	GO:0016301	-0.019
1764	2031	GO:2000480	-0.019
1765	1924	GO:0071944	-0.019
1766	1100	GO:0033613	-0.019
1767	1007	GO:0032147	-0.019
1768	1507	GO:0046674	-0.019
1769	1349	GO:0043537	-0.019
1770	1439	GO:0045668	-0.019
1771	990	GO:0031937	-0.019
1772	1240	GO:0042177	-0.019
1773	404	GO:0006357	-0.019
1774	1342	GO:0043497	-0.019
1775	155	GO:0001954	-0.019
1776	335	GO:0005757	-0.019
1777	1470	GO:0045892	-0.019
1778	730	GO:0016772	-0.02
1779	1124	GO:0034391	-0.02
1780	1351	GO:0043542	-0.02
1781	323	GO:0005667	-0.02
1782	1832	GO:0070301	-0.02
1783	1519	GO:0046889	-0.02
1784	1749	GO:0060326	-0.02
1785	1148	GO:0034979	-0.02
1786	1613	GO:0050678	-0.02
1787	813	GO:0021747	-0.02
1788	498	GO:0007440	-0.02
1789	2050	GO:2000757	-0.02
1790	258	GO:0004672	-0.02
1791	481	GO:0007179	-0.02
1792	2043	GO:2000655	-0.02
1793	667	GO:0014807	-0.02
1794	768	GO:0019049	-0.021
1795	1084	GO:0033280	-0.021
1796	1820	GO:0070059	-0.021
1797	1494	GO:0046579	-0.021
1798	192	GO:0003014	-0.021
1799	1816	GO:0061419	-0.021
1800	1632	GO:0051000	-0.021
1801	844	GO:0030010	-0.021
1802	1387	GO:0045063	-0.021
1803	1136	GO:0034644	-0.021
1804	131	GO:0001776	-0.021
1805	201	GO:0003264	-0.021
1806	1424	GO:0045597	-0.021
1807	265	GO:0004716	-0.021
1808	1055	GO:0032880	-0.021
1809	766	GO:0019028	-0.021
1810	1506	GO:0046671	-0.021
1811	1865	GO:0070888	-0.021
1812	792	GO:0019903	-0.021
1813	1253	GO:0042475	-0.021
1814	264	GO:0004713	-0.021
1815	586	GO:0010025	-0.021
1816	2003	GO:2000008	-0.022
1817	1890	GO:0071285	-0.022
1818	1382	GO:0044429	-0.022
1819	798	GO:0021515	-0.022
1820	41	GO:0000240	-0.022
1821	121	GO:0001657	-0.022
1822	1626	GO:0050821	-0.022
1823	1863	GO:0070848	-0.022
1824	1838	GO:0070373	-0.022
1825	618	GO:0010627	-0.022
1826	134	GO:0001822	-0.022
1827	6	GO:0000026	-0.022
1828	2105	hsa04350	-0.022
1829	202	GO:0003270	-0.022
1830	761	GO:0018107	-0.022
1831	1338	GO:0043425	-0.022
1832	634	GO:0010822	-0.022
1833	773	GO:0019236	-0.022
1834	1423	GO:0045596	-0.022
1835	2008	GO:2000059	-0.022
1836	614	GO:0010611	-0.022
1837	1576	GO:0048663	-0.022
1838	195	GO:0003160	-0.023
1839	755	GO:0018012	-0.023
1840	1569	GO:0048565	-0.023
1841	174	GO:0002360	-0.023
1842	765	GO:0018872	-0.023
1843	159	GO:0002039	-0.023
1844	2023	GO:2000348	-0.023
1845	1669	GO:0051434	-0.023
1846	542	GO:0008418	-0.023
1847	1041	GO:0032570	-0.023
1848	1450	GO:0045736	-0.023
1849	1341	GO:0043496	-0.023
1850	548	GO:0008532	-0.023
1851	333	GO:0005737	-0.023
1852	1171	GO:0035264	-0.023
1853	547	GO:0008493	-0.023
1854	1330	GO:0043353	-0.023
1855	98	GO:0000979	-0.023
1856	1520	GO:0046902	-0.023
1857	2020	GO:2000253	-0.024
1858	389	GO:0006309	-0.024
1859	753	GO:0017177	-0.024
1860	754	GO:0018009	-0.024
1861	630	GO:0010800	-0.024
1862	211	GO:0003682	-0.024
1863	708	GO:0016503	-0.024
1864	507	GO:0008013	-0.024
1865	1417	GO:0045471	-0.024
1866	1455	GO:0045765	-0.024
1867	2034	GO:2000507	-0.024
1868	706	GO:0016477	-0.024
1869	36	GO:0000215	-0.024
1870	1549	GO:0048145	-0.024
1871	2074	hsa04520	-0.024
1872	2029	GO:2000465	-0.024
1873	118	GO:0001568	-0.024
1874	1787	GO:0060740	-0.025
1875	408	GO:0006469	-0.025
1876	2028	GO:2000406	-0.025
1877	579	GO:0009898	-0.025
1878	108	GO:0001077	-0.025
1879	2019	GO:2000209	-0.025
1880	1281	GO:0042981	-0.025
1881	640	GO:0010869	-0.025
1882	1425	GO:0045599	-0.025
1883	152	GO:0001948	-0.025
1884	1097	GO:0033598	-0.025
1885	932	GO:0031100	-0.025
1886	759	GO:0018025	-0.025
1887	1614	GO:0050680	-0.025
1888	682	GO:0015904	-0.025
1889	1596	GO:0048839	-0.025
1890	656	GO:0012510	-0.025
1891	1327	GO:0043280	-0.025
1892	1903	GO:0071479	-0.025
1893	161	GO:0002052	-0.025
1894	563	GO:0009021	-0.025
1895	2066	GO:2001045	-0.026
1896	273	GO:0004861	-0.026
1897	665	GO:0014739	-0.026
1898	1365	GO:0043627	-0.026
1899	1331	GO:0043388	-0.026
1900	7	GO:0000060	-0.026
1901	764	GO:0018455	-0.026
1902	973	GO:0031575	-0.026
1903	1841	GO:0070412	-0.026
1904	39	GO:0000225	-0.026
1905	623	GO:0010718	-0.026
1906	756	GO:0018016	-0.026
1907	887	GO:0030336	-0.026
1908	2060	GO:2000827	-0.026
1909	577	GO:0009817	-0.026
1910	1038	GO:0032526	-0.026
1911	559	GO:0008808	-0.026
1912	33	GO:0000186	-0.027
1913	694	GO:0016229	-0.027
1914	1793	GO:0060749	-0.027
1915	555	GO:0008633	-0.027
1916	1898	GO:0071407	-0.027
1917	775	GO:0019319	-0.027
1918	176	GO:0002460	-0.027
1919	1393	GO:0045121	-0.027
1920	1541	GO:0047730	-0.027
1921	339	GO:0005775	-0.027
1922	407	GO:0006468	-0.027
1923	880	GO:0030308	-0.027
1924	1241	GO:0042219	-0.027
1925	1998	GO:1900126	-0.027
1926	480	GO:0007173	-0.027
1927	980	GO:0031625	-0.027
1928	1742	GO:0060262	-0.027
1929	491	GO:0007369	-0.027
1930	1235	GO:0042073	-0.028
1931	604	GO:0010468	-0.028
1932	1589	GO:0048745	-0.028
1933	1795	GO:0060751	-0.028
1934	167	GO:0002121	-0.028
1935	1211	GO:0035946	-0.028
1936	1748	GO:0060325	-0.028
1937	1210	GO:0035945	-0.028
1938	1245	GO:0042318	-0.028
1939	1335	GO:0043407	-0.028
1940	793	GO:0019904	-0.028
1941	1720	GO:0055107	-0.028
1942	496	GO:0007420	-0.028
1943	1708	GO:0052746	-0.028
1944	296	GO:0005515	-0.028
1945	503	GO:0007569	-0.028
1946	1221	GO:0038100	-0.029
1947	219	GO:0003700	-0.029
1948	1157	GO:0035066	-0.029
1949	181	GO:0002642	-0.029
1950	1667	GO:0051402	-0.029
1951	1765	GO:0060537	-0.029
1952	1354	GO:0043565	-0.029
1953	570	GO:0009314	-0.029
1954	760	GO:0018105	-0.029
1955	1197	GO:0035572	-0.029
1956	1276	GO:0042802	-0.029
1957	1173	GO:0035304	-0.029
1958	1310	GO:0043154	-0.029
1959	448	GO:0007050	-0.029
1960	777	GO:0019628	-0.029
1961	917	GO:0030879	-0.029
1962	26	GO:0000122	-0.029
1963	1189	GO:0035499	-0.029
1964	863	GO:0030183	-0.029
1965	1287	GO:0042998	-0.03
1966	2096	hsa04115	-0.03
1967	1542	GO:0048015	-0.03
1968	1206	GO:0035786	-0.03
1969	1198	GO:0035573	-0.03
1970	43	GO:0000279	-0.03
1971	1199	GO:0035594	-0.03
1972	791	GO:0019901	-0.03
1973	1205	GO:0035770	-0.03
1974	1974	GO:0090230	-0.03
1975	1282	GO:0042984	-0.03
1976	1340	GO:0043491	-0.03
1977	1415	GO:0045445	-0.03
1978	1153	GO:0035039	-0.03
1979	587	GO:0010033	-0.03
1980	597	GO:0010332	-0.03
1981	502	GO:0007507	-0.03
1982	1286	GO:0042997	-0.03
1983	122	GO:0001666	-0.031
1984	138	GO:0001836	-0.031
1985	1555	GO:0048237	-0.031
1986	248	GO:0004483	-0.031
1987	553	GO:0008629	-0.031
1988	936	GO:0031134	-0.031
1989	1502	GO:0046631	-0.031
1990	573	GO:0009611	-0.031
1991	1504	GO:0046633	-0.031
1992	1590	GO:0048754	-0.031
1993	229	GO:0003882	-0.031
1994	1489	GO:0046373	-0.031
1995	1374	GO:0044212	-0.031
1996	1513	GO:0046777	-0.031
1997	270	GO:0004765	-0.031
1998	1894	GO:0071363	-0.031
1999	1532	GO:0047016	-0.032
[truncated: 108 more rows]

## Sheet: Dateset4 MaxRel Table
Order	Feature	Name	Score
1	1062	GO:0031436	0.038
2	2278	GO:2000620	0.038
3	2277	GO:2000617	0.038
4	2071	GO:0070512	0.038
5	621	GO:0009048	0.036
6	48	GO:0000380	0.035
7	2190	GO:0085020	0.034
8	1732	GO:0048733	0.033
9	584	GO:0008283	0.031
10	1628	GO:0046600	0.031
11	1745	GO:0048859	0.03
12	1599	GO:0045943	0.03
13	700	GO:0010767	0.03
14	2276	GO:2000615	0.03
15	1074	GO:0031572	0.03
16	1712	GO:0048638	0.03
17	939	GO:0030056	0.03
18	62	GO:0000724	0.029
19	1891	GO:0060020	0.028
20	1349	GO:0042176	0.027
21	1705	GO:0048589	0.027
22	1566	GO:0045726	0.027
23	1696	GO:0048478	0.027
24	491	GO:0007064	0.027
25	1185	GO:0033261	0.026
26	489	GO:0007062	0.026
27	509	GO:0007126	0.026
28	1155	GO:0032863	0.026
29	346	GO:0005515	0.026
30	2252	GO:2000145	0.025
31	2101	GO:0071141	0.025
32	277	GO:0003918	0.025
33	82	GO:0000800	0.025
34	2104	GO:0071168	0.025
35	1301	GO:0035520	0.025
36	1590	GO:0045875	0.025
37	2287	GO:2000773	0.025
38	78	GO:0000794	0.025
39	2220	GO:0097149	0.024
40	2002	GO:0060789	0.024
41	1210	GO:0033993	0.024
42	559	GO:0008013	0.024
43	835	GO:0016922	0.024
44	2157	GO:0072133	0.024
45	2158	GO:0072134	0.024
46	1761	GO:0050681	0.024
47	475	GO:0006975	0.024
48	1136	GO:0032444	0.024
49	2125	GO:0071559	0.024
50	1692	GO:0048386	0.024
51	2160	GO:0072138	0.024
52	997	GO:0030616	0.024
53	1836	GO:0051574	0.024
54	1160	GO:0032909	0.023
55	1715	GO:0048645	0.023
56	1617	GO:0046332	0.023
57	1178	GO:0033148	0.023
58	1195	GO:0033593	0.023
59	2316	hsa04110	0.023
60	1081	GO:0031619	0.023
61	1549	GO:0045624	0.023
62	1673	GO:0048096	0.023
63	298	GO:0004677	0.023
64	440	GO:0006344	0.023
65	582	GO:0008278	0.023
66	286	GO:0004407	0.023
67	800	GO:0016363	0.023
68	2129	GO:0071681	0.023
69	1463	GO:0043517	0.022
70	892	GO:0019899	0.022
71	1512	GO:0045143	0.022
72	1050	GO:0031301	0.022
73	104	GO:0000987	0.022
74	1419	GO:0043140	0.022
75	16	GO:0000083	0.022
76	1261	GO:0035051	0.022
77	513	GO:0007141	0.022
78	426	GO:0006301	0.022
79	1161	GO:0032916	0.022
80	507	GO:0007108	0.022
81	91	GO:0000915	0.022
82	1400	GO:0043009	0.021
83	828	GO:0016799	0.021
84	674	GO:0010485	0.021
85	13	GO:0000079	0.021
86	1305	GO:0035624	0.021
87	1847	GO:0051726	0.021
88	1874	GO:0055007	0.021
89	1853	GO:0051797	0.021
90	18	GO:0000085	0.021
91	1760	GO:0050680	0.021
92	40	GO:0000228	0.021
93	345	GO:0005497	0.021
94	325	GO:0005072	0.021
95	2094	GO:0070969	0.021
96	1214	GO:0034088	0.021
97	1948	GO:0060449	0.021
98	1579	GO:0045786	0.021
99	1211	GO:0034056	0.021
100	1562	GO:0045682	0.021
101	2142	GO:0071930	0.021
102	1956	GO:0060520	0.021
103	2095	GO:0070974	0.021
104	1565	GO:0045720	0.021
105	871	GO:0019102	0.021
106	673	GO:0010484	0.021
107	1688	GO:0048318	0.021
108	516	GO:0007160	0.021
109	74	GO:0000785	0.021
110	1291	GO:0035402	0.021
111	1293	GO:0035407	0.021
112	369	GO:0005657	0.021
113	552	GO:0007507	0.021
114	423	GO:0006282	0.021
115	1584	GO:0045839	0.02
116	276	GO:0003917	0.02
117	576	GO:0008156	0.02
118	418	GO:0006268	0.02
119	1481	GO:0043626	0.02
120	1099	GO:0032077	0.02
121	57	GO:0000701	0.02
122	1630	GO:0046602	0.02
123	1809	GO:0051276	0.02
124	988	GO:0030511	0.02
125	1183	GO:0033205	0.02
126	1347	GO:0042159	0.02
127	110	GO:0001047	0.02
128	1894	GO:0060044	0.02
129	947	GO:0030174	0.02
130	474	GO:0006974	0.02
131	1914	GO:0060236	0.02
132	1177	GO:0033145	0.02
133	1128	GO:0032357	0.02
134	1105	GO:0032142	0.02
135	1923	GO:0060318	0.02
136	1939	GO:0060433	0.02
137	189	GO:0002009	0.019
138	993	GO:0030521	0.019
139	1407	GO:0043066	0.019
140	549	GO:0007500	0.019
141	1018	GO:0030893	0.019
142	610	GO:0008630	0.019
143	2239	GO:2000045	0.019
144	917	GO:0021889	0.019
145	1479	GO:0043596	0.019
146	746	GO:0014912	0.019
147	422	GO:0006281	0.019
148	726	GO:0010997	0.019
149	1326	GO:0038052	0.019
150	1088	GO:0031798	0.019
151	1270	GO:0035173	0.019
152	2247	GO:2000111	0.019
153	2237	GO:2000036	0.019
154	1434	GO:0043254	0.019
155	2081	GO:0070683	0.019
156	1805	GO:0051256	0.019
157	1232	GO:0034509	0.019
158	1812	GO:0051292	0.019
159	1033	GO:0031081	0.019
160	108	GO:0001042	0.019
161	1908	GO:0060209	0.019
162	1977	GO:0060687	0.019
163	1737	GO:0048812	0.019
164	1157	GO:0032876	0.019
165	388	GO:0005815	0.019
166	1735	GO:0048762	0.018
167	928	GO:0022408	0.018
168	75	GO:0000790	0.018
169	628	GO:0009294	0.018
170	1132	GO:0032405	0.018
171	1789	GO:0051098	0.018
172	499	GO:0007091	0.018
173	119	GO:0001300	0.018
174	706	GO:0010862	0.018
175	510	GO:0007127	0.018
176	874	GO:0019211	0.018
177	1274	GO:0035234	0.018
178	974	GO:0030337	0.018
179	1898	GO:0060068	0.018
180	1231	GO:0034504	0.018
181	1179	GO:0033153	0.018
182	2003	GO:0060804	0.018
183	1115	GO:0032288	0.018
184	2284	GO:2000726	0.018
185	2161	GO:0072144	0.018
186	1272	GO:0035189	0.018
187	964	GO:0030308	0.018
188	1934	GO:0060394	0.018
189	483	GO:0007049	0.018
190	921	GO:0021942	0.018
191	206	GO:0002102	0.018
192	173	GO:0001889	0.018
193	1889	GO:0060011	0.018
194	1559	GO:0045668	0.018
195	655	GO:0010159	0.018
196	2073	GO:0070531	0.018
197	571	GO:0008134	0.018
198	415	GO:0006261	0.018
199	337	GO:0005178	0.018
200	686	GO:0010626	0.018
201	1048	GO:0031297	0.018
202	320	GO:0005010	0.018
203	1816	GO:0051310	0.018
204	1171	GO:0033088	0.018
205	316	GO:0004882	0.018
206	1703	GO:0048565	0.018
207	2192	GO:0090003	0.017
208	1470	GO:0043539	0.017
209	693	GO:0010694	0.017
210	1933	GO:0060393	0.017
211	115	GO:0001102	0.017
212	293	GO:0004659	0.017
213	72	GO:0000780	0.017
214	1049	GO:0031298	0.017
215	1734	GO:0048754	0.017
216	1117	GO:0032298	0.017
217	2082	GO:0070700	0.017
218	511	GO:0007129	0.017
219	348	GO:0005520	0.017
220	366	GO:0005637	0.017
221	521	GO:0007179	0.017
222	496	GO:0007088	0.017
223	1856	GO:0051880	0.017
224	2100	GO:0071107	0.017
225	275	GO:0003916	0.017
226	1690	GO:0048333	0.017
227	1165	GO:0032967	0.017
228	1957	GO:0060523	0.017
229	1273	GO:0035196	0.017
230	272	GO:0003712	0.017
231	2016	GO:0061044	0.017
232	1295	GO:0035491	0.017
233	1819	GO:0051382	0.017
234	2088	GO:0070887	0.017
235	2107	GO:0071258	0.017
236	95	GO:0000939	0.017
237	1883	GO:0055100	0.017
238	1986	GO:0060740	0.017
239	882	GO:0019724	0.017
240	1446	GO:0043393	0.017
241	306	GO:0004721	0.017
242	523	GO:0007219	0.017
243	1104	GO:0032139	0.017
244	66	GO:0000739	0.017
245	65	GO:0000733	0.017
246	1769	GO:0050773	0.017
247	1706	GO:0048592	0.017
248	279	GO:0004003	0.017
249	713	GO:0010922	0.017
250	1648	GO:0046826	0.016
251	1336	GO:0040038	0.016
252	1773	GO:0050820	0.016
253	2173	GO:0072300	0.016
254	140	GO:0001673	0.016
255	2046	GO:0070173	0.016
256	1807	GO:0051271	0.016
257	727	GO:0012501	0.016
258	1464	GO:0043518	0.016
259	1501	GO:0045023	0.016
260	419	GO:0006270	0.016
261	1264	GO:0035065	0.016
262	1	GO:0000002	0.016
263	1344	GO:0042127	0.016
264	678	GO:0010559	0.016
265	1970	GO:0060599	0.016
266	2067	GO:0070463	0.016
267	1198	GO:0033600	0.016
268	1634	GO:0046632	0.016
269	497	GO:0007089	0.016
270	1585	GO:0045842	0.016
271	1135	GO:0032436	0.016
272	2151	GO:0072044	0.016
273	1158	GO:0032880	0.016
274	1031	GO:0031065	0.016
275	392	GO:0005873	0.016
276	605	GO:0008574	0.016
277	2329	hsa03440	0.016
278	502	GO:0007094	0.016
279	959	GO:0030263	0.016
280	862	GO:0018205	0.016
281	133	GO:0001655	0.016
282	909	GO:0021695	0.016
283	823	GO:0016605	0.016
284	1892	GO:0060021	0.016
285	1130	GO:0032374	0.016
286	2182	GO:0072428	0.016
287	135	GO:0001657	0.016
288	1955	GO:0060516	0.016
289	1728	GO:0048713	0.016
290	2260	GO:2000357	0.016
291	2261	GO:2000358	0.016
292	1949	GO:0060458	0.016
293	1443	GO:0043369	0.016
294	1950	GO:0060459	0.016
295	2000	GO:0060782	0.016
296	551	GO:0007502	0.016
297	2243	GO:2000063	0.016
298	2001	GO:0060783	0.016
299	1116	GO:0032290	0.016
300	2026	GO:0061189	0.016
301	1623	GO:0046534	0.016
302	2188	GO:0080125	0.016
303	743	GO:0014858	0.016
304	2110	GO:0071335	0.016
305	2066	GO:0070447	0.016
306	2227	GO:1900175	0.016
307	2242	GO:2000062	0.016
308	630	GO:0009330	0.016
309	867	GO:0019035	0.016
310	1589	GO:0045870	0.016
311	1595	GO:0045910	0.016
312	2271	GO:2000481	0.016
313	303	GO:0004712	0.016
314	923	GO:0021978	0.016
315	813	GO:0016572	0.016
316	1724	GO:0048703	0.016
317	261	GO:0003382	0.016
318	1659	GO:0046985	0.016
319	1799	GO:0051170	0.016
320	131	GO:0001570	0.015
321	1793	GO:0051149	0.015
322	1108	GO:0032154	0.015
323	1527	GO:0045296	0.015
324	257	GO:0003308	0.015
325	2098	GO:0071062	0.015
326	1747	GO:0048870	0.015
327	1902	GO:0060128	0.015
328	211	GO:0002244	0.015
329	1995	GO:0060761	0.015
330	970	GO:0030332	0.015
331	1131	GO:0032403	0.015
332	1258	GO:0035035	0.015
333	627	GO:0009267	0.015
334	1843	GO:0051668	0.015
335	73	GO:0000781	0.015
336	1506	GO:0045120	0.015
337	710	GO:0010894	0.015
338	1262	GO:0035054	0.015
339	500	GO:0007092	0.015
340	1201	GO:0033629	0.015
341	61	GO:0000723	0.015
342	488	GO:0007059	0.015
343	67	GO:0000775	0.015
344	1376	GO:0042585	0.015
345	2337	hsa04330	0.015
346	365	GO:0005634	0.015
347	2017	GO:0061045	0.015
348	505	GO:0007098	0.015
349	109	GO:0001046	0.015
350	1459	GO:0043497	0.015
351	71	GO:0000779	0.015
352	2078	GO:0070577	0.015
353	58	GO:0000710	0.015
354	1084	GO:0031643	0.015
355	626	GO:0009263	0.015
356	310	GO:0004748	0.015
357	1781	GO:0051010	0.015
358	1213	GO:0034080	0.015
359	1217	GO:0034121	0.015
360	2186	GO:0072686	0.015
361	1439	GO:0043296	0.015
362	2137	GO:0071864	0.015
363	1125	GO:0032348	0.015
364	2244	GO:2000065	0.015
365	1860	GO:0051895	0.015
366	2288	GO:2000774	0.015
367	556	GO:0007569	0.015
368	1601	GO:0045945	0.015
369	2241	GO:2000060	0.015
370	1271	GO:0035174	0.015
371	1292	GO:0035404	0.015
372	55	GO:0000444	0.015
373	1803	GO:0051247	0.015
374	834	GO:0016891	0.015
375	59	GO:0000712	0.015
376	141	GO:0001701	0.015
377	940	GO:0030097	0.015
378	1988	GO:0060743	0.015
379	2037	GO:0065004	0.015
380	9	GO:0000073	0.015
381	1330	GO:0040001	0.015
382	2269	GO:2000467	0.015
383	1504	GO:0045103	0.015
384	1094	GO:0031988	0.015
385	126	GO:0001556	0.015
386	1875	GO:0055008	0.015
387	1922	GO:0060317	0.015
388	715	GO:0010936	0.015
389	86	GO:0000808	0.015
390	2231	GO:1900281	0.015
391	1378	GO:0042634	0.015
392	1308	GO:0035712	0.015
393	1306	GO:0035708	0.015
394	2146	GO:0071954	0.015
395	1307	GO:0035709	0.015
396	210	GO:0002215	0.015
397	1532	GO:0045445	0.015
398	1969	GO:0060598	0.015
399	986	GO:0030509	0.015
400	803	GO:0016447	0.015
401	657	GO:0010212	0.015
402	894	GO:0019901	0.015
403	344	GO:0005496	0.015
404	1850	GO:0051782	0.014
405	654	GO:0010070	0.014
406	253	GO:0003279	0.014
407	2070	GO:0070507	0.014
408	817	GO:0016581	0.014
409	12	GO:0000077	0.014
410	1285	GO:0035330	0.014
411	548	GO:0007497	0.014
412	2308	GO:2001241	0.014
413	2339	hsa04114	0.014
414	134	GO:0001656	0.014
415	733	GO:0014013	0.014
416	873	GO:0019208	0.014
417	1546	GO:0045605	0.014
418	534	GO:0007346	0.014
419	2141	GO:0071922	0.014
420	1168	GO:0032993	0.014
421	2076	GO:0070557	0.014
422	848	GO:0017123	0.014
423	1154	GO:0032859	0.014
424	2038	GO:0070022	0.014
425	1373	GO:0042555	0.014
426	824	GO:0016628	0.014
427	2196	GO:0090074	0.014
428	2112	GO:0071363	0.014
429	555	GO:0007519	0.014
430	916	GO:0021873	0.014
431	525	GO:0007221	0.014
432	287	GO:0004468	0.014
433	259	GO:0003334	0.014
434	373	GO:0005664	0.014
435	70	GO:0000778	0.014
436	43	GO:0000278	0.014
437	2156	GO:0072125	0.014
438	1064	GO:0031490	0.014
439	1757	GO:0050658	0.014
440	1299	GO:0035518	0.014
441	1426	GO:0043220	0.014
442	1505	GO:0045109	0.014
443	1998	GO:0060768	0.014
444	1314	GO:0035855	0.014
445	1963	GO:0060564	0.014
446	998	GO:0030617	0.014
447	2206	GO:0090307	0.014
448	1221	GO:0034244	0.014
449	671	GO:0010468	0.014
450	989	GO:0030512	0.014
451	77	GO:0000793	0.014
452	1985	GO:0060738	0.014
453	1560	GO:0045669	0.014
454	1003	GO:0030690	0.014
455	404	GO:0005971	0.014
456	1037	GO:0031104	0.014
457	427	GO:0006302	0.014
458	368	GO:0005654	0.014
459	224	GO:0002576	0.014
460	1361	GO:0042415	0.014
461	581	GO:0008272	0.014
462	1629	GO:0046601	0.014
463	68	GO:0000776	0.014
464	494	GO:0007079	0.014
465	377	GO:0005694	0.014
466	1593	GO:0045892	0.014
467	84	GO:0000805	0.014
468	85	GO:0000806	0.014
469	1021	GO:0030951	0.014
470	450	GO:0006513	0.014
471	421	GO:0006275	0.014
472	150	GO:0001743	0.014
473	15	GO:0000082	0.014
474	1804	GO:0051248	0.014
475	2005	GO:0060823	0.014
476	96	GO:0000940	0.014
477	390	GO:0005828	0.014
478	1795	GO:0051152	0.014
479	1588	GO:0045862	0.014
480	1906	GO:0060177	0.014
481	1834	GO:0051571	0.014
482	1796	GO:0051154	0.014
483	1940	GO:0060438	0.014
484	915	GO:0021858	0.014
485	762	GO:0015327	0.014
486	121	GO:0001503	0.014
487	1046	GO:0031265	0.014
488	2063	GO:0070411	0.014
489	335	GO:0005173	0.014
490	1514	GO:0045171	0.014
491	1657	GO:0046982	0.014
492	567	GO:0008089	0.013
493	1518	GO:0045180	0.013
494	19	GO:0000087	0.013
495	2148	GO:0072015	0.013
496	2342	hsa05200	0.013
497	1813	GO:0051298	0.013
498	476	GO:0006978	0.013
499	586	GO:0008285	0.013
500	2248	GO:2000121	0.013
501	689	GO:0010629	0.013
502	933	GO:0023014	0.013
503	1961	GO:0060547	0.013
504	87	GO:0000819	0.013
505	238	GO:0003140	0.013
506	1060	GO:0031427	0.013
507	1857	GO:0051891	0.013
508	2058	GO:0070314	0.013
509	1027	GO:0031053	0.013
510	1121	GO:0032318	0.013
511	1484	GO:0043697	0.013
512	1840	GO:0051649	0.013
513	1196	GO:0033594	0.013
514	151	GO:0001755	0.013
515	1635	GO:0046639	0.013
516	1563	GO:0045685	0.013
517	918	GO:0021897	0.013
518	809	GO:0016539	0.013
519	1873	GO:0055001	0.013
520	679	GO:0010569	0.013
521	694	GO:0010718	0.013
522	1483	GO:0043652	0.013
523	1916	GO:0060253	0.013
524	1975	GO:0060685	0.013
525	431	GO:0006310	0.013
526	802	GO:0016446	0.013
527	2168	GO:0072200	0.013
528	2152	GO:0072097	0.013
529	2164	GO:0072161	0.013
530	2295	GO:2001012	0.013
531	1952	GO:0060502	0.013
532	2167	GO:0072198	0.013
533	2201	GO:0090194	0.013
534	296	GO:0004674	0.013
535	2166	GO:0072192	0.013
536	2153	GO:0072101	0.013
537	1693	GO:0048392	0.013
538	1877	GO:0055020	0.013
539	1557	GO:0045665	0.013
540	982	GO:0030496	0.013
541	1953	GO:0060503	0.013
542	2025	GO:0061155	0.013
543	2234	GO:2000007	0.013
544	2023	GO:0061151	0.013
545	2250	GO:2000137	0.013
546	1968	GO:0060592	0.013
547	2138	GO:0071893	0.013
548	2022	GO:0061149	0.013
549	2233	GO:2000005	0.013
550	1537	GO:0045542	0.013
551	1833	GO:0051534	0.013
552	3	GO:0000019	0.013
553	810	GO:0016568	0.013
554	371	GO:0005662	0.013
555	4	GO:0000022	0.013
556	1966	GO:0060574	0.013
557	2191	GO:0085029	0.013
558	2345	hsa05215	0.013
559	1455	GO:0043433	0.013
560	1997	GO:0060766	0.013
561	2130	GO:0071732	0.013
562	457	GO:0006820	0.013
563	973	GO:0030336	0.013
564	1665	GO:0047485	0.013
565	2163	GO:0072160	0.013
566	839	GO:0017015	0.013
567	685	GO:0010625	0.013
568	1838	GO:0051580	0.013
569	136	GO:0001658	0.013
570	2062	GO:0070410	0.013
571	1709	GO:0048598	0.013
572	347	GO:0005518	0.013
573	2154	GO:0072102	0.013
574	1002	GO:0030660	0.013
575	2296	GO:2001013	0.013
576	1499	GO:0044464	0.013
577	229	GO:0002763	0.013
578	1515	GO:0045175	0.013
579	724	GO:0010991	0.013
580	420	GO:0006271	0.013
581	234	GO:0003014	0.013
582	1636	GO:0046661	0.013
583	1815	GO:0051301	0.013
584	7	GO:0000070	0.013
585	1242	GO:0034676	0.013
586	1333	GO:0040016	0.013
587	649	GO:0009986	0.013
588	1507	GO:0045121	0.013
589	99	GO:0000978	0.013
590	112	GO:0001077	0.013
591	967	GO:0030324	0.013
592	503	GO:0007095	0.013
593	1397	GO:0042992	0.013
594	1203	GO:0033673	0.013
595	779	GO:0015995	0.013
596	1363	GO:0042471	0.013
597	1077	GO:0031576	0.013
598	832	GO:0016851	0.013
599	778	GO:0015979	0.013
600	414	GO:0006260	0.013
601	623	GO:0009186	0.013
602	879	GO:0019237	0.013
603	977	GO:0030423	0.013
604	195	GO:0002043	0.013
605	2349	hsa05222	0.012
606	966	GO:0030323	0.012
607	2132	GO:0071778	0.012
608	898	GO:0019985	0.012
609	1119	GO:0032301	0.012
610	1106	GO:0032143	0.012
611	1725	GO:0048709	0.012
612	1855	GO:0051879	0.012
613	213	GO:0002320	0.012
614	1072	GO:0031536	0.012
615	1192	GO:0033561	0.012
616	2165	GO:0072189	0.012
617	943	GO:0030127	0.012
618	1335	GO:0040023	0.012
619	1324	GO:0038007	0.012
620	273	GO:0003713	0.012
621	255	GO:0003289	0.012
622	1976	GO:0060686	0.012
623	1323	GO:0036071	0.012
624	598	GO:0008424	0.012
625	1414	GO:0043112	0.012
626	1655	GO:0046921	0.012
627	1869	GO:0051988	0.012
628	958	GO:0030261	0.012
629	1133	GO:0032422	0.012
630	41	GO:0000236	0.012
631	44	GO:0000285	0.012
632	1107	GO:0032147	0.012
633	2232	GO:1900625	0.012
634	737	GO:0014067	0.012
635	1410	GO:0043085	0.012
636	221	GO:0002520	0.012
637	1382	GO:0042692	0.012
638	1082	GO:0031625	0.012
639	1723	GO:0048701	0.012
640	804	GO:0016477	0.012
641	192	GO:0002039	0.012
642	2013	GO:0061035	0.012
643	449	GO:0006470	0.012
644	1867	GO:0051984	0.012
645	893	GO:0019900	0.012
646	161	GO:0001829	0.012
647	2211	GO:0090399	0.012
648	1941	GO:0060439	0.012
649	1325	GO:0038028	0.012
650	2121	GO:0071480	0.012
651	2131	GO:0071777	0.012
652	2350	hsa04350	0.012
653	314	GO:0004843	0.012
654	269	GO:0003691	0.012
655	814	GO:0016574	0.012
656	433	GO:0006312	0.012
657	976	GO:0030422	0.012
658	1359	GO:0042393	0.012
659	643	GO:0009880	0.012
660	1756	GO:0050431	0.012
661	1710	GO:0048608	0.012
662	2279	GO:2000648	0.012
663	1085	GO:0031647	0.012
664	1638	GO:0046677	0.012
665	1736	GO:0048808	0.012
666	2282	GO:2000721	0.012
667	1137	GO:0032463	0.012
668	2174	GO:0072305	0.012
669	1329	GO:0039003	0.012
670	811	GO:0016570	0.012
671	127	GO:0001558	0.012
672	2228	GO:1900212	0.012
673	1191	GO:0033558	0.012
674	2230	GO:1900218	0.012
675	2229	GO:1900215	0.012
676	2274	GO:2000594	0.012
677	1401	GO:0043015	0.012
678	240	GO:0003158	0.012
679	262	GO:0003383	0.012
680	1102	GO:0032133	0.012
681	1173	GO:0033128	0.012
682	11	GO:0000076	0.012
683	2320	hsa03030	0.012
684	1032	GO:0031069	0.012
685	2064	GO:0070412	0.012
686	1127	GO:0032355	0.012
687	2283	GO:2000724	0.012
688	2298	GO:2001015	0.012
689	2147	GO:0071956	0.012
690	1752	GO:0050115	0.012
691	203	GO:0002083	0.012
692	249	GO:0003231	0.012
693	128	GO:0001560	0.012
694	1662	GO:0047293	0.012
695	840	GO:0017018	0.012
696	1810	GO:0051280	0.012
697	2195	GO:0090007	0.012
698	167	GO:0001838	0.012
699	1680	GO:0048210	0.012
700	81	GO:0000797	0.012
701	1101	GO:0032116	0.012
702	2096	GO:0070975	0.012
703	1268	GO:0035140	0.012
704	853	GO:0017176	0.012
705	2323	hsa04144	0.012
706	464	GO:0006895	0.012
707	2289	GO:2000779	0.012
708	632	GO:0009401	0.012
709	340	GO:0005316	0.012
710	482	GO:0007044	0.012
711	2068	GO:0070483	0.012
712	1931	GO:0060389	0.012
713	435	GO:0006333	0.012
714	374	GO:0005667	0.012
715	522	GO:0007183	0.012
716	1653	GO:0046903	0.012
717	987	GO:0030510	0.012
718	2119	GO:0071459	0.012
719	1360	GO:0042405	0.012
720	1536	GO:0045502	0.012
721	1372	GO:0042552	0.012
722	1228	GO:0034451	0.012
723	645	GO:0009912	0.012
724	2235	GO:2000008	0.012
725	957	GO:0030235	0.012
726	2021	GO:0061146	0.012
727	2217	GO:0097021	0.012
728	170	GO:0001848	0.012
729	492	GO:0007067	0.012
730	363	GO:0005608	0.012
731	80	GO:0000796	0.012
732	2218	GO:0097070	0.012
733	268	GO:0003689	0.012
734	595	GO:0008409	0.012
735	691	GO:0010669	0.012
736	176	GO:0001933	0.012
737	1942	GO:0060440	0.012
738	697	GO:0010742	0.012
739	858	GO:0018105	0.012
740	795	GO:0016324	0.012
741	1144	GO:0032584	0.012
742	1658	GO:0046983	0.012
743	519	GO:0007173	0.012
744	830	GO:0016817	0.012
745	1729	GO:0048714	0.012
746	1831	GO:0051493	0.012
747	1143	GO:0032570	0.012
748	208	GO:0002193	0.012
749	1280	GO:0035264	0.012
750	709	GO:0010870	0.012
751	114	GO:0001085	0.012
752	1488	GO:0043967	0.012
753	2324	hsa05213	0.012
754	1237	GO:0034616	0.012
755	2312	hsa04520	0.012
756	2010	GO:0060916	0.011
757	1535	GO:0045475	0.011
758	1447	GO:0043398	0.011
759	984	GO:0030501	0.011
760	1139	GO:0032508	0.011
761	444	GO:0006357	0.011
762	252	GO:0003273	0.011
763	308	GO:0004725	0.011
764	761	GO:0015297	0.011
765	578	GO:0008207	0.011
766	624	GO:0009234	0.011
767	1719	GO:0048664	0.011
768	2057	GO:0070306	0.011
769	153	GO:0001763	0.011
770	1036	GO:0031102	0.011
771	1944	GO:0060442	0.011
772	1792	GO:0051146	0.011
773	864	GO:0018393	0.011
774	1547	GO:0045616	0.011
775	1075	GO:0031573	0.011
776	1284	GO:0035312	0.011
777	1864	GO:0051908	0.011
778	89	GO:0000900	0.011
779	1513	GO:0045145	0.011
780	1377	GO:0042587	0.011
781	1189	GO:0033484	0.011
782	1802	GO:0051233	0.011
783	200	GO:0002076	0.011
784	1671	GO:0048015	0.011
785	2159	GO:0072136	0.011
786	207	GO:0002162	0.011
787	1396	GO:0042985	0.011
788	93	GO:0000922	0.011
789	683	GO:0010594	0.011
790	1138	GO:0032467	0.011
791	2055	GO:0070295	0.011
792	2149	GO:0072017	0.011
793	574	GO:0008147	0.011
794	906	GO:0021650	0.011
795	2275	GO:2000597	0.011
796	1286	GO:0035335	0.011
797	2033	GO:0061360	0.011
798	1408	GO:0043067	0.011
799	905	GO:0021633	0.011
800	2030	GO:0061304	0.011
801	1266	GO:0035098	0.011
802	2172	GO:0072278	0.011
803	875	GO:0019212	0.011
804	1126	GO:0032354	0.011
805	565	GO:0008054	0.011
806	1821	GO:0051389	0.011
807	2258	GO:2000342	0.011
808	1797	GO:0051155	0.011
809	1594	GO:0045893	0.011
810	536	GO:0007369	0.011
811	182	GO:0001940	0.011
812	1486	GO:0043923	0.011
813	1626	GO:0046579	0.011
814	29	GO:0000151	0.011
815	1893	GO:0060039	0.011
816	2317	hsa05220	0.011
817	163	GO:0001833	0.011
818	1254	GO:0035021	0.011
819	1993	GO:0060750	0.011
820	125	GO:0001547	0.011
821	2183	GO:0072563	0.011
822	2189	GO:0080134	0.011
823	2205	GO:0090305	0.011
824	926	GO:0022027	0.011
825	484	GO:0007050	0.011
826	2221	GO:0097150	0.011
827	403	GO:0005969	0.011
828	2251	GO:2000144	0.011
829	1609	GO:0046060	0.011
830	323	GO:0005055	0.011
831	1896	GO:0060051	0.011
832	684	GO:0010616	0.011
833	786	GO:0016189	0.011
834	1544	GO:0045603	0.011
835	1731	GO:0048730	0.011
836	1451	GO:0043409	0.011
837	735	GO:0014037	0.011
838	592	GO:0008356	0.011
839	193	GO:0002040	0.011
840	1625	GO:0046578	0.011
841	1058	GO:0031396	0.011
842	467	GO:0006921	0.011
843	695	GO:0010719	0.011
844	1103	GO:0032137	0.011
845	962	GO:0030284	0.011
846	1574	GO:0045749	0.011
847	1517	GO:0045178	0.011
848	1097	GO:0032025	0.011
849	504	GO:0007096	0.011
850	550	GO:0007501	0.011
851	53	GO:0000405	0.011
852	209	GO:0002204	0.011
853	1510	GO:0045128	0.011
854	1014	GO:0030870	0.011
855	14	GO:0000080	0.011
856	1718	GO:0048663	0.011
857	2083	GO:0070734	0.011
858	825	GO:0016772	0.011
859	872	GO:0019206	0.011
860	343	GO:0005488	0.011
861	968	GO:0030325	0.011
862	1758	GO:0050678	0.011
863	2109	GO:0071285	0.011
864	38	GO:0000216	0.011
865	512	GO:0007131	0.011
866	2150	GO:0072040	0.011
867	2006	GO:0060825	0.011
868	2257	GO:2000313	0.011
869	2200	GO:0090193	0.011
870	485	GO:0007051	0.011
871	106	GO:0001010	0.011
872	1279	GO:0035261	0.011
873	2198	GO:0090166	0.011
874	690	GO:0010664	0.011
875	1920	GO:0060302	0.011
876	1358	GO:0042371	0.011
877	237	GO:0003139	0.011
878	2330	hsa05166	0.011
879	205	GO:0002093	0.011
880	1785	GO:0051054	0.011
881	138	GO:0001669	0.011
882	1890	GO:0060017	0.011
883	1698	GO:0048532	0.011
884	20	GO:0000088	0.011
885	2303	GO:2001038	0.011
886	1704	GO:0048570	0.011
887	1289	GO:0035371	0.011
888	765	GO:0015629	0.011
889	10	GO:0000075	0.011
890	2333	hsa03430	0.011
891	1166	GO:0032970	0.011
892	895	GO:0019902	0.011
893	936	GO:0030030	0.011
894	446	GO:0006461	0.011
895	1288	GO:0035359	0.011
896	2029	GO:0061302	0.011
897	2300	GO:2001020	0.01
898	25	GO:0000117	0.01
899	849	GO:0017124	0.01
900	1678	GO:0048185	0.01
901	1420	GO:0043142	0.01
902	2238	GO:2000042	0.01
903	1202	GO:0033631	0.01
904	2139	GO:0071901	0.01
905	334	GO:0005160	0.01
906	214	GO:0002328	0.01
907	1650	GO:0046847	0.01
908	1903	GO:0060129	0.01
909	808	GO:0016538	0.01
910	1309	GO:0035748	0.01
911	243	GO:0003181	0.01
912	1651	GO:0046855	0.01
913	1826	GO:0051443	0.01
914	487	GO:0007057	0.01
915	389	GO:0005819	0.01
916	1964	GO:0060565	0.01
917	589	GO:0008347	0.01
918	1876	GO:0055013	0.01
919	797	GO:0016337	0.01
920	1369	GO:0042524	0.01
921	54	GO:0000406	0.01
922	1225	GO:0034391	0.01
923	2280	GO:2000655	0.01
924	439	GO:0006343	0.01
925	352	GO:0005534	0.01
926	432	GO:0006311	0.01
927	1057	GO:0031393	0.01
928	942	GO:0030100	0.01
929	2085	GO:0070765	0.01
930	1251	GO:0034979	0.01
931	1287	GO:0035358	0.01
932	381	GO:0005726	0.01
933	1120	GO:0032302	0.01
934	2270	GO:2000480	0.01
935	1716	GO:0048646	0.01
936	1938	GO:0060425	0.01
937	1109	GO:0032181	0.01
938	2286	GO:2000757	0.01
939	1475	GO:0043570	0.01
940	1141	GO:0032526	0.01
941	619	GO:0009008	0.01
942	1592	GO:0045885	0.01
943	1627	GO:0046580	0.01
944	1431	GO:0043237	0.01
945	791	GO:0016310	0.01
946	561	GO:0008037	0.01
947	395	GO:0005902	0.01
948	1741	GO:0048844	0.01
949	688	GO:0010628	0.01
950	162	GO:0001832	0.01
951	1882	GO:0055096	0.01
952	2155	GO:0072104	0.01
953	416	GO:0006265	0.01
954	1943	GO:0060441	0.01
955	1539	GO:0045596	0.01
956	36	GO:0000189	0.01
957	26	GO:0000122	0.01
958	295	GO:0004672	0.01
959	653	GO:0010046	0.01
960	1708	GO:0048596	0.01
961	1476	GO:0043586	0.01
962	934	GO:0030010	0.01
963	2080	GO:0070668	0.01
964	1996	GO:0060765	0.01
965	1009	GO:0030850	0.01
966	1341	GO:0042063	0.01
967	788	GO:0016202	0.01
968	670	GO:0010465	0.01
969	2123	GO:0071535	0.01
970	719	GO:0010952	0.01
971	955	GO:0030221	0.01
972	703	GO:0010801	0.01
973	927	GO:0022037	0.01
974	1967	GO:0060576	0.01
975	1140	GO:0032509	0.01
976	1937	GO:0060420	0.01
977	1034	GO:0031098	0.01
978	2302	GO:2001027	0.01
979	2272	GO:2000504	0.01
980	720	GO:0010966	0.01
981	721	GO:0010972	0.01
982	975	GO:0030379	0.01
983	843	GO:0017082	0.01
984	1958	GO:0060527	0.01
985	1973	GO:0060662	0.01
986	1919	GO:0060290	0.01
987	696	GO:0010738	0.01
988	285	GO:0004333	0.01
989	409	GO:0006106	0.01
990	1524	GO:0045239	0.01
991	590	GO:0008353	0.01
992	1682	GO:0048251	0.01
993	166	GO:0001837	0.01
994	1787	GO:0051096	0.01
995	529	GO:0007276	0.01
996	745	GO:0014902	0.01
997	822	GO:0016604	0.01
998	622	GO:0009157	0.01
999	1610	GO:0046078	0.01
1000	1151	GO:0032810	0.01
1001	312	GO:0004799	0.01
1002	235	GO:0003062	0.01
1003	870	GO:0019088	0.01
1004	324	GO:0005070	0.01
1005	412	GO:0006231	0.01
1006	2126	GO:0071564	0.01
1007	2266	GO:2000401	0.01
1008	580	GO:0008262	0.01
1009	436	GO:0006335	0.01
1010	1750	GO:0048878	0.01
1011	569	GO:0008094	0.01
1012	1835	GO:0051573	0.01
1013	2012	GO:0061029	0.01
1014	1412	GO:0043089	0.01
1015	901	GO:0021521	0.01
1016	1603	GO:0045964	0.01
1017	774	GO:0015867	0.01
1018	820	GO:0016589	0.01
1019	741	GO:0014807	0.01
1020	251	GO:0003270	0.01
1021	250	GO:0003264	0.01
1022	241	GO:0003160	0.01
1023	2034	GO:0061383	0.01
1024	640	GO:0009791	0.01
1025	911	GO:0021747	0.01
1026	900	GO:0021515	0.01
1027	1991	GO:0060748	0.01
1028	2035	GO:0061419	0.01
1029	547	GO:0007440	0.01
1030	1016	GO:0030879	0.01
1031	1677	GO:0048168	0.01
1032	266	GO:0003680	0.01
1033	2319	hsa05210	0.01
1034	2315	hsa05219	0.01
1035	1367	GO:0042487	0.01
1036	1578	GO:0045778	0.01
1037	1868	GO:0051987	0.01
1038	330	GO:0005113	0.01
1039	1639	GO:0046680	0.01
1040	992	GO:0030520	0.01
1041	2223	GO:0097178	0.01
1042	2108	GO:0071283	0.01
1043	1971	GO:0060623	0.01
1044	51	GO:0000403	0.01
1045	790	GO:0016301	0.01
1046	994	GO:0030522	0.01
1047	2263	GO:2000377	0.01
1048	553	GO:0007517	0.01
1049	819	GO:0016585	0.01
1050	2245	GO:2000098	0.01
1051	1238	GO:0034629	0.01
1052	336	GO:0005176	0.01
1053	1389	GO:0042802	0.01
1054	1290	GO:0035372	0.01
1055	1521	GO:0045197	0.01
1056	1461	GO:0043515	0.01
1057	201	GO:0002079	0.01
1058	254	GO:0003283	0.01
1059	2262	GO:2000373	0.01
1060	1247	GO:0034722	0.01
1061	577	GO:0008194	0.01
1062	2310	GO:2001271	0.01
1063	405	GO:0005979	0.01
1064	1827	GO:0051444	0.01
1065	1858	GO:0051893	0.009
1066	560	GO:0008022	0.009
1067	1531	GO:0045444	0.009
1068	1538	GO:0045595	0.009
1069	202	GO:0002080	0.009
1070	2092	GO:0070933	0.009
1071	2344	hsa04914	0.009
1072	111	GO:0001076	0.009
1073	2042	GO:0070064	0.009
1074	1607	GO:0046038	0.009
1075	1338	GO:0042058	0.009
1076	1870	GO:0052657	0.009
1077	1056	GO:0031345	0.009
1078	411	GO:0006178	0.009
1079	1608	GO:0046040	0.009
1080	1611	GO:0046083	0.009
1081	829	GO:0016805	0.009
1082	1613	GO:0046100	0.009
1083	2099	GO:0071065	0.009
1084	304	GO:0004713	0.009
1085	1112	GO:0032263	0.009
1086	46	GO:0000307	0.009
1087	1503	GO:0045069	0.009
1088	1385	GO:0042770	0.009
1089	705	GO:0010832	0.009
1090	246	GO:0003197	0.009
1091	402	GO:0005968	0.009
1092	1848	GO:0051754	0.009
1093	666	GO:0010389	0.009
1094	169	GO:0001841	0.009
1095	319	GO:0005006	0.009
1096	1052	GO:0031324	0.009
1097	1818	GO:0051329	0.009
1098	1852	GO:0051795	0.009
1099	428	GO:0006303	0.009
1100	2009	GO:0060900	0.009
1101	2290	GO:2000780	0.009
1102	2255	GO:2000276	0.009
1103	2293	GO:2000802	0.009
1104	2292	GO:2000793	0.009
1105	1700	GO:0048538	0.009
1106	2246	GO:2000105	0.009
1107	2327	hsa04510	0.009
1108	2340	hsa04115	0.009
1109	1089	GO:0031937	0.009
1110	2032	GO:0061351	0.009
1111	2122	GO:0071481	0.009
1112	8	GO:0000072	0.009
1113	149	GO:0001741	0.009
1114	2052	GO:0070254	0.009
1115	1026	GO:0031032	0.009
1116	1689	GO:0048320	0.009
1117	1681	GO:0048227	0.009
1118	1180	GO:0033158	0.009
1119	922	GO:0021955	0.009
1120	1989	GO:0060744	0.009
1121	1340	GO:0042060	0.009
1122	1726	GO:0048711	0.009
1123	1502	GO:0045059	0.009
1124	1749	GO:0048873	0.009
1125	1784	GO:0051019	0.009
1126	658	GO:0010216	0.009
1127	732	GO:0014010	0.009
1128	2086	GO:0070816	0.009
1129	1241	GO:0034649	0.009
1130	1304	GO:0035617	0.009
1131	784	GO:0016082	0.009
1132	821	GO:0016590	0.009
1133	2203	GO:0090234	0.009
1134	2199	GO:0090169	0.009
1135	1122	GO:0032319	0.009
1136	1884	GO:0055105	0.009
1137	1440	GO:0043297	0.009
1138	1951	GO:0060463	0.009
1139	1575	GO:0045765	0.009
1140	410	GO:0006109	0.009
1141	1581	GO:0045792	0.009
1142	2170	GO:0072207	0.009
1143	2065	GO:0070438	0.009
1144	1411	GO:0043086	0.009
1145	1480	GO:0043610	0.009
1146	1472	GO:0043550	0.009
1147	1063	GO:0031441	0.009
1148	1814	GO:0051299	0.009
1149	1212	GO:0034063	0.009
1150	2105	GO:0071173	0.009
1151	52	GO:0000404	0.009
1152	2332	hsa05218	0.009
1153	1200	GO:0033627	0.009
1154	1100	GO:0032091	0.009
1155	699	GO:0010763	0.009
1156	1348	GO:0042162	0.009
1157	847	GO:0017111	0.009
1158	566	GO:0008078	0.009
1159	607	GO:0008608	0.009
1160	1899	GO:0060074	0.009
1161	1633	GO:0046628	0.009
1162	602	GO:0008509	0.009
1163	2091	GO:0070932	0.009
1164	1452	GO:0043410	0.009
1165	637	GO:0009629	0.009
1166	990	GO:0030513	0.009
1167	954	GO:0030220	0.009
1168	1929	GO:0060364	0.009
1169	698	GO:0010757	0.009
1170	1460	GO:0043503	0.009
1171	349	GO:0005521	0.009
1172	1927	GO:0060348	0.009
1173	1674	GO:0048145	0.009
1174	37	GO:0000212	0.009
1175	884	GO:0019789	0.009
1176	1448	GO:0043402	0.009
1177	1375	GO:0042583	0.009
1178	317	GO:0004883	0.009
1179	1091	GO:0031946	0.009
1180	908	GO:0021666	0.009
1181	907	GO:0021660	0.009
1182	283	GO:0004146	0.009
1183	1936	GO:0060401	0.009
1184	1147	GO:0032784	0.009
1185	1616	GO:0046329	0.009
1186	1772	GO:0050798	0.009
1187	1457	GO:0043491	0.009
1188	796	GO:0016328	0.009
1189	1974	GO:0060684	0.009
1190	1029	GO:0031056	0.009
1191	2222	GO:0097157	0.009
1192	1022	GO:0030953	0.009
1193	2226	GO:1900126	0.009
1194	1477	GO:0043587	0.009
1195	1427	GO:0043227	0.009
1196	1353	GO:0042307	0.009
1197	1994	GO:0060751	0.009
1198	1645	GO:0046785	0.009
1199	1355	GO:0042325	0.009
1200	641	GO:0009817	0.009
1201	600	GO:0008432	0.009
1202	1010	GO:0030851	0.009
1203	216	GO:0002460	0.009
1204	514	GO:0007144	0.009
1205	284	GO:0004314	0.009
1206	1223	GO:0034332	0.009
1207	438	GO:0006338	0.009
1208	379	GO:0005719	0.009
1209	2181	GO:0072369	0.009
1210	1142	GO:0032548	0.009
1211	425	GO:0006298	0.009
1212	490	GO:0007063	0.009
1213	1612	GO:0046092	0.009
1214	282	GO:0004137	0.009
1215	22	GO:0000090	0.009
1216	729	GO:0012507	0.009
1217	199	GO:0002062	0.009
1218	132	GO:0001649	0.009
1219	1220	GO:0034237	0.009
1220	143	GO:0001707	0.009
1221	1984	GO:0060736	0.009
1222	1912	GO:0060218	0.009
1223	1554	GO:0045662	0.009
1224	1393	GO:0042954	0.009
1225	1841	GO:0051653	0.009
1226	842	GO:0017056	0.009
1227	370	GO:0005658	0.009
1228	196	GO:0002051	0.009
1229	2299	GO:2001016	0.009
1230	470	GO:0006930	0.009
1231	357	GO:0005586	0.009
1232	1110	GO:0032201	0.009
1233	501	GO:0007093	0.009
1234	60	GO:0000722	0.009
1235	2127	GO:0071565	0.009
1236	278	GO:0003953	0.009
1237	1404	GO:0043047	0.009
1238	17	GO:0000084	0.009
1239	1474	GO:0043566	0.009
1240	1068	GO:0031523	0.009
1241	2024	GO:0061153	0.009
1242	585	GO:0008284	0.009
1243	171	GO:0001881	0.009
1244	663	GO:0010266	0.009
1245	1149	GO:0032794	0.009
1246	1207	GO:0033690	0.009
1247	1637	GO:0046671	0.009
1248	1717	GO:0048660	0.009
1249	1425	GO:0043219	0.009
1250	242	GO:0003180	0.009
1251	1865	GO:0051974	0.009
1252	941	GO:0030098	0.009
1253	1312	GO:0035799	0.009
1254	877	GO:0019217	0.009
1255	1469	GO:0043537	0.009
1256	1759	GO:0050679	0.009
1257	1253	GO:0035020	0.009
1258	1711	GO:0048617	0.009
1259	400	GO:0005925	0.008
1260	1453	GO:0043415	0.008
1261	396	GO:0005911	0.008
1262	2256	GO:2000279	0.008
1263	2103	GO:0071158	0.008
1264	2171	GO:0072221	0.008
1265	1176	GO:0033138	0.008
1266	398	GO:0005913	0.008
1267	326	GO:0005080	0.008
1268	117	GO:0001106	0.008
1269	1552	GO:0045646	0.008
1270	1777	GO:0050849	0.008
1271	1730	GO:0048715	0.008
1272	1319	GO:0035990	0.008
1273	2180	GO:0072368	0.008
1274	291	GO:0004525	0.008
1275	1028	GO:0031054	0.008
1276	591	GO:0008354	0.008
1277	1992	GO:0060749	0.008
1278	1193	GO:0033574	0.008
1279	1086	GO:0031648	0.008
1280	991	GO:0030514	0.008
1281	2011	GO:0061002	0.008
1282	1780	GO:0051000	0.008
1283	1972	GO:0060644	0.008
1284	1277	GO:0035257	0.008
1285	1327	GO:0038085	0.008
1286	1770	GO:0050775	0.008
1287	1798	GO:0051168	0.008
1288	1691	GO:0048340	0.008
1289	1863	GO:0051901	0.008
1290	660	GO:0010226	0.008
1291	1583	GO:0045799	0.008
1292	2273	GO:2000587	0.008
1293	1129	GO:0032370	0.008
1294	583	GO:0008280	0.008
1295	1911	GO:0060217	0.008
1296	1930	GO:0060375	0.008
1297	1720	GO:0048671	0.008
1298	69	GO:0000777	0.008
1299	1182	GO:0033193	0.008
1300	682	GO:0010593	0.008
1301	665	GO:0010333	0.008
1302	1320	GO:0035994	0.008
1303	787	GO:0016191	0.008
1304	1236	GO:0034595	0.008
1305	532	GO:0007286	0.008
1306	1424	GO:0043175	0.008
1307	1017	GO:0030892	0.008
1308	539	GO:0007402	0.008
1309	564	GO:0008052	0.008
1310	544	GO:0007420	0.008
1311	342	GO:0005452	0.008
1312	1543	GO:0045602	0.008
1313	227	GO:0002663	0.008
1314	2204	GO:0090267	0.008
1315	1945	GO:0060443	0.008
1316	271	GO:0003697	0.008
1317	226	GO:0002651	0.008
1318	1245	GO:0034714	0.008
1319	1523	GO:0045216	0.008
1320	2118	GO:0071456	0.008
1321	270	GO:0003696	0.008
1322	382	GO:0005737	0.008
1323	659	GO:0010225	0.008
1324	530	GO:0007281	0.008
1325	1278	GO:0035259	0.008
1326	1714	GO:0048643	0.008
1327	677	GO:0010506	0.008
1328	190	GO:0002011	0.008
1329	766	GO:0015630	0.008
1330	215	GO:0002377	0.008
1331	406	GO:0005981	0.008
1332	372	GO:0005663	0.008
1333	294	GO:0004663	0.008
1334	1435	GO:0043256	0.008
1335	1199	GO:0033613	0.008
1336	1740	GO:0048839	0.008
1337	2341	hsa05212	0.008
1338	1918	GO:0060272	0.008
1339	113	GO:0001078	0.008
1340	1602	GO:0045950	0.008
1341	612	GO:0008634	0.008
1342	744	GO:0014889	0.008
1343	351	GO:0005524	0.008
1344	1298	GO:0035507	0.008
1345	662	GO:0010260	0.008
1346	27	GO:0000145	0.008
1347	1915	GO:0060242	0.008
1348	2179	GO:0072365	0.008
1349	995	GO:0030530	0.008
1350	24	GO:0000115	0.008
1351	2054	GO:0070278	0.008
1352	248	GO:0003219	0.008
1353	367	GO:0005652	0.008
1354	1577	GO:0045769	0.008
1355	2297	GO:2001014	0.008
1356	1842	GO:0051661	0.008
1357	1240	GO:0034648	0.008
1358	904	GO:0021537	0.008
1359	1591	GO:0045884	0.008
1360	1282	GO:0035267	0.008
1361	535	GO:0007352	0.008
1362	1006	GO:0030838	0.008
1363	1364	GO:0042475	0.008
1364	2027	GO:0061198	0.008
1365	736	GO:0014044	0.008
1366	629	GO:0009314	0.008
1367	181	GO:0001939	0.008
1368	869	GO:0019049	0.008
1369	231	GO:0002903	0.008
1370	540	GO:0007403	0.008
1371	177	GO:0001934	0.008
1372	963	GO:0030307	0.008
1373	1516	GO:0045177	0.008
1374	1742	GO:0048853	0.008
1375	1526	GO:0045295	0.008
1376	1430	GO:0043236	0.008
1377	593	GO:0008398	0.008
1378	92	GO:0000921	0.008
1379	1194	GO:0033578	0.008
1380	617	GO:0008965	0.008
1381	1392	GO:0042941	0.008
1382	1315	GO:0035873	0.008
1383	768	GO:0015727	0.008
1384	2043	GO:0070086	0.008
1385	1259	GO:0035036	0.008
1386	1871	GO:0052739	0.008
1387	1496	GO:0044425	0.008
1388	749	GO:0015129	0.008
1389	1872	GO:0052740	0.008
1390	90	GO:0000910	0.008
1391	1374	GO:0042578	0.008
1392	49	GO:0000381	0.008
1393	1417	GO:0043130	0.008
1394	1525	GO:0045294	0.008
1395	538	GO:0007398	0.008
1396	1053	GO:0031333	0.008
1397	739	GO:0014740	0.008
1398	2202	GO:0090219	0.008
1399	754	GO:0015181	0.008
1400	1008	GO:0030845	0.008
1401	1921	GO:0060305	0.008
1402	712	GO:0010920	0.008
1403	2077	GO:0070560	0.008
1404	142	GO:0001702	0.008
1405	397	GO:0005912	0.008
1406	714	GO:0010925	0.008
1407	23	GO:0000098	0.008
1408	851	GO:0017145	0.008
1409	447	GO:0006468	0.008
1410	31	GO:0000164	0.008
1411	1783	GO:0051018	0.008
1412	466	GO:0006915	0.008
1413	944	GO:0030140	0.008
1414	2102	GO:0071157	0.008
1415	228	GO:0002684	0.008
1416	597	GO:0008420	0.008
1417	2075	GO:0070551	0.008
1418	481	GO:0007028	0.008
1419	1152	GO:0032835	0.008
1420	1564	GO:0045713	0.008
1421	318	GO:0004955	0.008
1422	1980	GO:0060694	0.008
1423	2114	GO:0071391	0.008
1424	711	GO:0010906	0.008
1425	350	GO:0005522	0.008
1426	1520	GO:0045190	0.008
1427	2178	GO:0072362	0.008
1428	2253	GO:2000191	0.008
1429	2044	GO:0070087	0.008
1430	2111	GO:0071353	0.008
1431	1551	GO:0045638	0.008
1432	1164	GO:0032956	0.008
1433	236	GO:0003094	0.008
1434	2	GO:0000012	0.008
1435	1926	GO:0060347	0.008
1436	1083	GO:0031641	0.008
1437	1550	GO:0045636	0.008
1438	1670	GO:0048011	0.008
1439	1227	GO:0034446	0.008
1440	2194	GO:0090005	0.008
1441	1328	GO:0038092	0.008
1442	267	GO:0003682	0.008
1443	935	GO:0030027	0.008
1444	999	GO:0030618	0.008
1445	165	GO:0001836	0.008
1446	1478	GO:0043588	0.008
1447	2120	GO:0071479	0.008
1448	1905	GO:0060157	0.008
1449	1542	GO:0045600	0.008
1450	105	GO:0000988	0.008
1451	1239	GO:0034644	0.008
1452	1386	GO:0042771	0.008
1453	859	GO:0018107	0.008
1454	493	GO:0007076	0.008
1455	1436	GO:0043259	0.008
1456	1346	GO:0042153	0.007
1457	1743	GO:0048854	0.007
1458	896	GO:0019903	0.007
1459	1399	GO:0042995	0.007
1460	1405	GO:0043062	0.007
1461	297	GO:0004675	0.007
1462	841	GO:0017048	0.007
1463	274	GO:0003777	0.007
1464	773	GO:0015827	0.007
1465	33	GO:0000183	0.007
1466	579	GO:0008209	0.007
1467	609	GO:0008629	0.007
1468	1492	GO:0044212	0.007
1469	1598	GO:0045931	0.007
1470	1294	GO:0035428	0.007
1471	750	GO:0015149	0.007
1472	1379	GO:0042637	0.007
1473	1007	GO:0030844	0.007
1474	1744	GO:0048858	0.007
1475	718	GO:0010944	0.007
1476	1854	GO:0051865	0.007
1477	1568	GO:0045732	0.007
1478	1811	GO:0051290	0.007
1479	1197	GO:0033598	0.007
1480	1281	GO:0035265	0.007
1481	1962	GO:0060548	0.007
1482	1702	GO:0048562	0.007
1483	1317	GO:0035985	0.007
1484	1318	GO:0035986	0.007
1485	1605	GO:0046022	0.007
1486	846	GO:0017108	0.007
1487	2213	GO:0090402	0.007
1488	702	GO:0010800	0.007
1489	1808	GO:0051272	0.007
1490	1368	GO:0042493	0.007
1491	638	GO:0009636	0.007
1492	831	GO:0016818	0.007
1493	1019	GO:0030900	0.007
1494	239	GO:0003156	0.007
1495	451	GO:0006515	0.007
1496	152	GO:0001756	0.007
1497	1775	GO:0050840	0.007
1498	1313	GO:0035802	0.007
1499	1159	GO:0032886	0.007
1500	2115	GO:0071398	0.007
1501	1509	GO:0045124	0.007
1502	1150	GO:0032801	0.007
1503	220	GO:0002495	0.007
1504	837	GO:0016933	0.007
1505	1621	GO:0046485	0.007
1506	1620	GO:0046459	0.007
1507	456	GO:0006780	0.007
1508	570	GO:0008127	0.007
1509	2079	GO:0070646	0.007
1510	2004	GO:0060821	0.007
1511	1096	GO:0032023	0.007
1512	408	GO:0006043	0.007
1513	1910	GO:0060216	0.007
1514	2336	hsa05223	0.007
1515	1442	GO:0043368	0.007
1516	148	GO:0001740	0.007
1517	28	GO:0000150	0.007
1518	147	GO:0001726	0.007
1519	865	GO:0019005	0.007
1520	1880	GO:0055062	0.007
1521	322	GO:0005026	0.007
1522	1384	GO:0042759	0.007
1523	353	GO:0005540	0.007
1524	1356	GO:0042326	0.007
1525	1252	GO:0034983	0.007
1526	1040	GO:0031175	0.007
1527	2117	GO:0071455	0.007
1528	157	GO:0001817	0.007
1529	244	GO:0003183	0.007
1530	417	GO:0006266	0.007
1531	160	GO:0001825	0.007
1532	1092	GO:0031954	0.007
1533	635	GO:0009611	0.007
1534	1631	GO:0046620	0.007
1535	1666	GO:0047496	0.007
1536	1978	GO:0060688	0.007
1537	1380	GO:0042640	0.007
1538	664	GO:0010332	0.007
1539	1351	GO:0042221	0.007
1540	1954	GO:0060512	0.007
1541	76	GO:0000792	0.007
1542	1230	GO:0034501	0.007
1543	587	GO:0008309	0.007
1544	1042	GO:0031213	0.007
1545	2328	hsa05214	0.007
1546	1640	GO:0046683	0.007
1547	101	GO:0000980	0.007
1548	1090	GO:0031941	0.007
1549	946	GO:0030155	0.007
1550	949	GO:0030177	0.007
1551	1925	GO:0060326	0.007
1552	1468	GO:0043535	0.007
1553	1466	GO:0043524	0.007
1554	897	GO:0019904	0.007
1555	910	GO:0021702	0.007
1556	1172	GO:0033092	0.007
1557	1205	GO:0033688	0.007
1558	2212	GO:0090400	0.007
1559	1497	GO:0044429	0.007
1560	1283	GO:0035279	0.007
1561	83	GO:0000801	0.007
1562	56	GO:0000506	0.007
1563	1817	GO:0051322	0.007
1564	1365	GO:0042476	0.007
1565	639	GO:0009649	0.007
1566	1779	GO:0050872	0.007
1567	656	GO:0010165	0.007
1568	929	GO:0022409	0.007
1569	1928	GO:0060363	0.007
1570	557	GO:0007596	0.007
1571	1907	GO:0060197	0.007
1572	302	GO:0004708	0.007
1573	950	GO:0030198	0.007
1574	120	GO:0001501	0.007
1575	1039	GO:0031146	0.007
1576	769	GO:0015755	0.007
1577	424	GO:0006297	0.007
1578	506	GO:0007100	0.007
1579	1134	GO:0032429	0.007
1580	118	GO:0001190	0.007
1581	2351	hsa05216	0.007
1582	1490	GO:0044030	0.007
1583	863	GO:0018277	0.007
1584	2059	GO:0070317	0.007
1585	747	GO:0015002	0.007
1586	2219	GO:0097100	0.007
1587	2106	GO:0071253	0.007
1588	1649	GO:0046831	0.007
1589	445	GO:0006409	0.007
1590	770	GO:0015807	0.007
1591	1388	GO:0042799	0.007
1592	1250	GO:0034773	0.007
1593	881	GO:0019646	0.007
1594	1791	GO:0051106	0.007
1595	725	GO:0010994	0.007
1596	1596	GO:0045916	0.007
1597	362	GO:0005606	0.007
1598	1494	GO:0044354	0.007
1599	1067	GO:0031508	0.007
1600	1024	GO:0030983	0.007
1601	1012	GO:0030858	0.007
1602	2093	GO:0070935	0.007
1603	1458	GO:0043496	0.007
1604	1683	GO:0048255	0.007
1605	798	GO:0016342	0.007
1606	1982	GO:0060710	0.007
1607	520	GO:0007175	0.007
1608	129	GO:0001568	0.007
1609	1571	GO:0045739	0.007
1610	836	GO:0016925	0.007
1611	1114	GO:0032286	0.007
1612	2291	GO:2000781	0.007
1613	2346	hsa04810	0.007
1614	116	GO:0001103	0.007
1615	1721	GO:0048678	0.007
1616	1697	GO:0048489	0.007
1617	434	GO:0006323	0.007
1618	1823	GO:0051403	0.007
1619	260	GO:0003337	0.007
1620	1687	GO:0048286	0.007
1621	801	GO:0016442	0.007
1622	983	GO:0030500	0.007
1623	164	GO:0001835	0.007
1624	1269	GO:0035162	0.007
1625	1087	GO:0031670	0.007
1626	2074	GO:0070534	0.007
1627	1794	GO:0051150	0.007
1628	299	GO:0004693	0.007
1629	145	GO:0001710	0.007
1630	1418	GO:0043137	0.007
1631	1684	GO:0048256	0.007
1632	79	GO:0000795	0.007
1633	924	GO:0021983	0.007
1634	885	GO:0019827	0.007
1635	913	GO:0021785	0.007
1636	1669	GO:0048009	0.007
1637	613	GO:0008637	0.007
1638	541	GO:0007405	0.007
1639	1597	GO:0045930	0.007
1640	722	GO:0010975	0.007
1641	508	GO:0007113	0.007
1642	2039	GO:0070051	0.007
1643	462	GO:0006883	0.007
1644	2047	GO:0070181	0.007
1645	1614	GO:0046318	0.007
1646	156	GO:0001787	0.007
1647	1897	GO:0060065	0.006
1648	960	GO:0030275	0.006
1649	1675	GO:0048146	0.006
1650	1990	GO:0060745	0.006
1651	185	GO:0001953	0.006
1652	1011	GO:0030857	0.006
1653	1765	GO:0050765	0.006
1654	588	GO:0008340	0.006
1655	1465	GO:0043519	0.006
1656	2045	GO:0070123	0.006
1657	1186	GO:0033262	0.006
1658	1243	GO:0034699	0.006
1659	1175	GO:0033137	0.006
1660	668	GO:0010458	0.006
1661	1895	GO:0060045	0.006
1662	1782	GO:0051017	0.006
1663	1413	GO:0043103	0.006
1664	158	GO:0001822	0.006
1665	633	GO:0009411	0.006
1666	1844	GO:0051683	0.006
1667	914	GO:0021797	0.006
1668	2314	hsa05100	0.006
1669	554	GO:0007518	0.006
1670	888	GO:0019838	0.006
1671	64	GO:0000731	0.006
1672	159	GO:0001823	0.006
1673	634	GO:0009432	0.006
1674	1181	GO:0033186	0.006
1675	2338	hsa03420	0.006
1676	1162	GO:0032924	0.006
1677	1879	GO:0055037	0.006
1678	1066	GO:0031497	0.006
1679	902	GO:0021522	0.006
1680	771	GO:0015825	0.006
1681	758	GO:0015194	0.006
1682	1778	GO:0050851	0.006
1683	2051	GO:0070221	0.006
1684	1790	GO:0051101	0.006
1685	1909	GO:0060213	0.006
1686	1146	GO:0032680	0.006
1687	1428	GO:0043234	0.006
1688	2014	GO:0061036	0.006
1689	1391	GO:0042826	0.006
1690	948	GO:0030175	0.006
1691	413	GO:0006235	0.006
1692	531	GO:0007283	0.006
1693	2050	GO:0070215	0.006
1694	498	GO:0007090	0.006
1695	1005	GO:0030742	0.006
1696	1829	GO:0051489	0.006
1697	1371	GO:0042551	0.006
1698	184	GO:0001952	0.006
1699	1586	GO:0045843	0.006
1700	1170	GO:0033026	0.006
1701	1224	GO:0034333	0.006
1702	1438	GO:0043281	0.006
1703	956	GO:0030224	0.006
1704	1828	GO:0051488	0.006
1705	1246	GO:0034720	0.006
1706	384	GO:0005769	0.006
1707	383	GO:0005768	0.006
1708	515	GO:0007155	0.006
1709	1528	GO:0045309	0.006
1710	375	GO:0005677	0.006
1711	1473	GO:0043552	0.006
1712	783	GO:0016050	0.006
1713	1540	GO:0045597	0.006
1714	1030	GO:0031060	0.006
1715	1403	GO:0043035	0.006
1716	887	GO:0019836	0.006
1717	563	GO:0008045	0.006
1718	618	GO:0008967	0.006
1719	1249	GO:0034770	0.006
1720	701	GO:0010771	0.006
1721	1511	GO:0045132	0.006
1722	546	GO:0007435	0.006
1723	197	GO:0002052	0.006
1724	1738	GO:0048813	0.006
1725	178	GO:0001935	0.006
1726	852	GO:0017166	0.006
1727	1576	GO:0045768	0.006
1728	2240	GO:2000059	0.006
1729	672	GO:0010469	0.006
1730	2134	GO:0071813	0.006
1731	1078	GO:0031581	0.006
1732	168	GO:0001839	0.006
1733	1257	GO:0035033	0.006
1734	1699	GO:0048536	0.006
1735	537	GO:0007386	0.006
1736	1482	GO:0043627	0.006
1737	1959	GO:0060528	0.006
1738	2306	GO:2001141	0.006
1739	1076	GO:0031575	0.006
1740	107	GO:0001012	0.006
1741	2209	GO:0090344	0.006
1742	1582	GO:0045793	0.006
1743	1722	GO:0048699	0.006
1744	1947	GO:0060445	0.006
1745	827	GO:0016791	0.006
1746	480	GO:0007019	0.006
1747	2177	GO:0072357	0.006
1748	364	GO:0005626	0.006
1749	826	GO:0016773	0.006
1750	1851	GO:0051788	0.006
1751	734	GO:0014033	0.006
1752	1080	GO:0031616	0.006
1753	1174	GO:0033133	0.006
1754	442	GO:0006353	0.006
1755	495	GO:0007080	0.006
1756	1422	GO:0043153	0.006
1757	818	GO:0016584	0.006
1758	667	GO:0010457	0.006
1759	358	GO:0005588	0.006
1760	100	GO:0000979	0.006
1761	1004	GO:0030718	0.006
1762	1727	GO:0048712	0.006
1763	247	GO:0003203	0.006
1764	1190	GO:0033553	0.006
1765	180	GO:0001938	0.006
1766	1999	GO:0060769	0.006
1767	1733	GO:0048745	0.006
1768	1859	GO:0051894	0.006
1769	1423	GO:0043161	0.006
1770	328	GO:0005099	0.006
1771	681	GO:0010592	0.006
1772	1302	GO:0035562	0.006
1773	930	GO:0022612	0.006
1774	1965	GO:0060571	0.006
1775	2018	GO:0061047	0.006
1776	608	GO:0008624	0.006
1777	919	GO:0021915	0.006
1778	290	GO:0004523	0.006
1779	1932	GO:0060391	0.006
1780	1098	GO:0032071	0.006
1781	155	GO:0001783	0.006
1782	1707	GO:0048593	0.006
1783	1530	GO:0045347	0.006
1784	1409	GO:0043069	0.006
1785	1587	GO:0045859	0.006
1786	606	GO:0008601	0.006
1787	63	GO:0000730	0.006
1788	1045	GO:0031262	0.006
1789	1866	GO:0051983	0.006
1790	2040	GO:0070052	0.006
1791	816	GO:0016580	0.006
1792	891	GO:0019898	0.006
1793	1339	GO:0042059	0.006
1794	2348	hsa05131	0.006
1795	401	GO:0005938	0.006
1796	222	GO:0002521	0.006
1797	518	GO:0007172	0.006
1798	1065	GO:0031491	0.006
1799	188	GO:0001968	0.005
1800	198	GO:0002053	0.005
1801	1647	GO:0046825	0.005
1802	1987	GO:0060742	0.005
1803	794	GO:0016323	0.005
1804	1300	GO:0035519	0.005
1805	2116	GO:0071407	0.005
1806	1394	GO:0042975	0.005
1807	1558	GO:0045667	0.005
1808	1768	GO:0050772	0.005
1809	1642	GO:0046689	0.005
1810	1054	GO:0031334	0.005
1811	2249	GO:2000134	0.005
1812	263	GO:0003417	0.005
1813	1695	GO:0048477	0.005
1814	1487	GO:0043932	0.005
1815	1467	GO:0043525	0.005
1816	1748	GO:0048872	0.005
1817	1862	GO:0051898	0.005
1818	1035	GO:0031100	0.005
1819	2089	GO:0070888	0.005
1820	486	GO:0007052	0.005
1821	2208	GO:0090343	0.005
1822	265	GO:0003678	0.005
1823	2031	GO:0061309	0.005
1824	680	GO:0010571	0.005
1825	360	GO:0005595	0.005
1826	799	GO:0016344	0.005
1827	232	GO:0002904	0.005
1828	775	GO:0015876	0.005
1829	1491	GO:0044091	0.005
1830	603	GO:0008521	0.005
1831	1886	GO:0055108	0.005
1832	1656	GO:0046975	0.005
1833	356	GO:0005581	0.005
1834	752	GO:0015175	0.005
1835	2008	GO:0060841	0.005
1836	562	GO:0008043	0.005
1837	1118	GO:0032299	0.005
1838	2015	GO:0061042	0.005
1839	912	GO:0021773	0.005
1840	1604	GO:0045995	0.005
1841	333	GO:0005158	0.005
1842	256	GO:0003290	0.005
1843	1357	GO:0042347	0.005
1844	1043	GO:0031235	0.005
1845	123	GO:0001541	0.005
1846	321	GO:0005024	0.005
1847	1188	GO:0033314	0.005
1848	1493	GO:0044314	0.005
1849	763	GO:0015377	0.005
1850	527	GO:0007258	0.005
1851	2185	GO:0072659	0.005
1852	1672	GO:0048041	0.005
1853	1471	GO:0043542	0.005
1854	1267	GO:0035117	0.005
1855	717	GO:0010942	0.005
1856	925	GO:0022011	0.005
1857	2061	GO:0070373	0.005
1858	1255	GO:0035022	0.005
1859	636	GO:0009612	0.005
1860	391	GO:0005829	0.005
1861	386	GO:0005795	0.005
1862	1350	GO:0042177	0.005
1863	1556	GO:0045664	0.005
1864	1825	GO:0051412	0.005
1865	2056	GO:0070301	0.005
1866	1561	GO:0045670	0.005
1867	1038	GO:0031116	0.005
1868	1449	GO:0043406	0.005
1869	753	GO:0015179	0.005
1870	459	GO:0006865	0.005
1871	1437	GO:0043260	0.005
1872	889	GO:0019853	0.005
1873	951	GO:0030199	0.005
1874	1148	GO:0032786	0.005
1875	1701	GO:0048557	0.005
1876	45	GO:0000287	0.005
1877	978	GO:0030426	0.005
1878	594	GO:0008408	0.005
1879	2007	GO:0060840	0.005
1880	1256	GO:0035024	0.005
1881	1644	GO:0046777	0.005
1882	332	GO:0005154	0.005
1883	1204	GO:0033674	0.005
1884	1095	GO:0031994	0.005
1885	704	GO:0010811	0.005
1886	452	GO:0006536	0.005
1887	32	GO:0000165	0.005
1888	1061	GO:0031435	0.005
1889	1767	GO:0050771	0.005
1890	448	GO:0006469	0.005
1891	1387	GO:0042787	0.005
1892	644	GO:0009898	0.005
1893	1570	GO:0045737	0.005
1894	187	GO:0001958	0.005
1895	723	GO:0010976	0.005
1896	1070	GO:0031528	0.005
1897	137	GO:0001666	0.005
1898	477	GO:0007004	0.005
1899	1567	GO:0045727	0.005
1900	890	GO:0019897	0.005
1901	1763	GO:0050714	0.005
1902	1573	GO:0045746	0.005
1903	194	GO:0002042	0.005
1904	2072	GO:0070527	0.005
1905	1415	GO:0043124	0.005
1906	1069	GO:0031527	0.005
1907	980	GO:0030478	0.005
1908	1124	GO:0032321	0.005
1909	937	GO:0030032	0.005
1910	172	GO:0001885	0.005
1911	981	GO:0030479	0.005
1912	979	GO:0030449	0.005
1913	611	GO:0008633	0.005
1914	331	GO:0005114	0.005
1915	1979	GO:0060693	0.005
1916	1766	GO:0050767	0.005
1917	533	GO:0007342	0.005
1918	2301	GO:2001022	0.005
1919	1548	GO:0045618	0.005
1920	1216	GO:0034116	0.005
1921	1215	GO:0034115	0.005
1922	1849	GO:0051781	0.005
1923	669	GO:0010463	0.005
1924	1830	GO:0051492	0.005
1925	972	GO:0030335	0.005
1926	1832	GO:0051496	0.005
1927	1445	GO:0043392	0.005
1928	961	GO:0030279	0.005
1929	952	GO:0030214	0.005
1930	186	GO:0001954	0.005
1931	1643	GO:0046718	0.005
1932	675	GO:0010494	0.005
1933	899	GO:0021510	0.005
1934	1059	GO:0031398	0.005
1935	393	GO:0005876	0.005
1936	2322	hsa04512	0.005
1937	647	GO:0009925	0.005
1938	301	GO:0004705	0.005
1939	716	GO:0010940	0.005
1940	1553	GO:0045648	0.005
1941	361	GO:0005604	0.005
1942	615	GO:0008853	0.004
1943	572	GO:0008138	0.004
1944	1641	GO:0046686	0.004
1945	792	GO:0016311	0.004
1946	1632	GO:0046621	0.004
1947	543	GO:0007411	0.004
1948	329	GO:0005112	0.004
1949	2041	GO:0070059	0.004
1950	2347	hsa05211	0.004
1951	1406	GO:0043065	0.004
1952	2311	hsa05221	0.004
1953	731	GO:0014002	0.004
1954	969	GO:0030331	0.004
1955	1837	GO:0051575	0.004
1956	130	GO:0001569	0.004
1957	1694	GO:0048471	0.004
1958	545	GO:0007422	0.004
1959	1935	GO:0060395	0.004
1960	1111	GO:0032228	0.004
1961	931	GO:0022614	0.004
1962	315	GO:0004861	0.004
1963	1429	GO:0043235	0.004
1964	1839	GO:0051635	0.004
1965	1337	GO:0042054	0.004
1966	876	GO:0019215	0.004
1967	212	GO:0002248	0.004
1968	47	GO:0000320	0.004
1969	856	GO:0018024	0.004
1970	437	GO:0006337	0.004
1971	355	GO:0005579	0.004
1972	1679	GO:0048208	0.004
1973	2264	GO:2000378	0.004
1974	1489	GO:0043968	0.004
1975	945	GO:0030145	0.004
1976	139	GO:0001672	0.004
1977	642	GO:0009877	0.004
1978	2019	GO:0061090	0.004
1979	443	GO:0006354	0.004
1980	1845	GO:0051684	0.004
1981	860	GO:0018108	0.004
1982	920	GO:0021940	0.004
1983	646	GO:0009913	0.004
1984	1495	GO:0044419	0.004
1985	1533	GO:0045446	0.004
1986	1981	GO:0060706	0.004
1987	528	GO:0007265	0.004
1988	1654	GO:0046914	0.004
1989	1555	GO:0045663	0.004
1990	1534	GO:0045471	0.004
1991	399	GO:0005916	0.004
1992	1580	GO:0045787	0.004
1993	1187	GO:0033280	0.004
1994	103	GO:0000982	0.004
1995	463	GO:0006888	0.004
1996	2069	GO:0070487	0.004
1997	30	GO:0000159	0.004
1998	471	GO:0006956	0.004
1999	1462	GO:0043516	0.004
[truncated: 351 more rows]

## Sheet: Dateset4 mRMR Table
Order	Feature	Name	Score
1	1062	GO:0031436	0.038
2	1050	GO:0031301	0.022
3	939	GO:0030056	0.019
4	48	GO:0000380	0.016
5	835	GO:0016922	0.016
6	1891	GO:0060020	0.013
7	1562	GO:0045682	0.013
8	1590	GO:0045875	0.014
9	848	GO:0017123	0.012
10	2160	GO:0072138	0.013
11	1130	GO:0032374	0.012
12	921	GO:0021942	0.012
13	189	GO:0002009	0.012
14	1349	GO:0042176	0.013
15	491	GO:0007064	0.012
16	293	GO:0004659	0.011
17	2101	GO:0071141	0.011
18	1155	GO:0032863	0.011
19	9	GO:0000073	0.011
20	1836	GO:0051574	0.011
21	762	GO:0015327	0.01
22	1712	GO:0048638	0.01
23	915	GO:0021858	0.01
24	1074	GO:0031572	0.01
25	348	GO:0005520	0.01
26	2094	GO:0070969	0.01
27	340	GO:0005316	0.01
28	457	GO:0006820	0.01
29	582	GO:0008278	0.01
30	286	GO:0004407	0.01
31	1376	GO:0042585	0.01
32	853	GO:0017176	0.009
33	1154	GO:0032859	0.009
34	1599	GO:0045943	0.01
35	276	GO:0003917	0.009
36	516	GO:0007160	0.009
37	578	GO:0008207	0.009
38	2190	GO:0085020	0.01
39	1715	GO:0048645	0.009
40	1799	GO:0051170	0.009
41	1301	GO:0035520	0.009
42	119	GO:0001300	0.009
43	632	GO:0009401	0.008
44	1732	GO:0048733	0.009
45	1673	GO:0048096	0.009
46	1378	GO:0042634	0.008
47	828	GO:0016799	0.008
48	1874	GO:0055007	0.008
49	388	GO:0005815	0.008
50	1609	GO:0046060	0.008
51	1680	GO:0048210	0.008
52	345	GO:0005497	0.008
53	1261	GO:0035051	0.008
54	306	GO:0004721	0.008
55	1323	GO:0036071	0.008
56	2220	GO:0097149	0.008
57	323	GO:0005055	0.008
58	1584	GO:0045839	0.008
59	206	GO:0002102	0.008
60	621	GO:0009048	0.008
61	746	GO:0014912	0.008
62	285	GO:0004333	0.007
63	366	GO:0005637	0.008
64	761	GO:0015297	0.007
65	1706	GO:0048592	0.007
66	511	GO:0007129	0.007
67	1969	GO:0060598	0.007
68	624	GO:0009234	0.007
69	2252	GO:2000145	0.007
70	277	GO:0003918	0.007
71	2237	GO:2000036	0.007
72	1549	GO:0045624	0.007
73	581	GO:0008272	0.007
74	1136	GO:0032444	0.007
75	598	GO:0008424	0.007
76	1463	GO:0043517	0.007
77	1392	GO:0042941	0.007
78	1305	GO:0035624	0.007
79	1961	GO:0060547	0.007
80	943	GO:0030127	0.007
81	1210	GO:0033993	0.007
82	1894	GO:0060044	0.007
83	1470	GO:0043539	0.007
84	62	GO:0000724	0.007
85	1752	GO:0050115	0.007
86	1871	GO:0052739	0.007
87	1781	GO:0051010	0.007
88	2231	GO:1900281	0.007
89	1299	GO:0035518	0.007
90	1133	GO:0032422	0.007
91	2283	GO:2000724	0.007
92	320	GO:0005010	0.007
93	1414	GO:0043112	0.006
94	700	GO:0010767	0.007
95	988	GO:0030511	0.007
96	1363	GO:0042471	0.006
97	628	GO:0009294	0.006
98	1872	GO:0052740	0.006
99	1358	GO:0042371	0.006
100	1934	GO:0060394	0.006
101	1883	GO:0055100	0.006
102	408	GO:0006043	0.006
103	1650	GO:0046847	0.006
104	423	GO:0006282	0.006
105	1566	GO:0045726	0.006
106	1745	GO:0048859	0.006
107	418	GO:0006268	0.006
108	2203	GO:0090234	0.006
109	1916	GO:0060253	0.006
110	1115	GO:0032288	0.006
111	1620	GO:0046459	0.006
112	1211	GO:0034056	0.006
113	840	GO:0017018	0.006
114	1185	GO:0033261	0.006
115	577	GO:0008194	0.006
116	1655	GO:0046921	0.006
117	82	GO:0000800	0.006
118	1896	GO:0060051	0.006
119	464	GO:0006895	0.006
120	1724	GO:0048703	0.006
121	1347	GO:0042159	0.006
122	1160	GO:0032909	0.006
123	829	GO:0016805	0.006
124	1479	GO:0043596	0.006
125	133	GO:0001655	0.006
126	2052	GO:0070254	0.006
127	1446	GO:0043393	0.006
128	1304	GO:0035617	0.006
129	1819	GO:0051382	0.006
130	203	GO:0002083	0.006
131	44	GO:0000285	0.006
132	2298	GO:2001015	0.006
133	874	GO:0019211	0.006
134	1419	GO:0043140	0.006
135	1128	GO:0032357	0.006
136	314	GO:0004843	0.006
137	2016	GO:0061044	0.006
138	917	GO:0021889	0.006
139	409	GO:0006106	0.006
140	2287	GO:2000773	0.006
141	2098	GO:0071062	0.006
142	593	GO:0008398	0.006
143	1259	GO:0035036	0.006
144	2276	GO:2000615	0.006
145	2079	GO:0070646	0.006
146	1315	GO:0035873	0.006
147	655	GO:0010159	0.006
148	1648	GO:0046826	0.006
149	1241	GO:0034649	0.006
150	1	GO:0000002	0.006
151	402	GO:0005968	0.006
152	170	GO:0001848	0.006
153	1696	GO:0048478	0.006
154	837	GO:0016933	0.006
155	824	GO:0016628	0.006
156	1308	GO:0035712	0.006
157	1653	GO:0046903	0.006
158	1178	GO:0033148	0.006
159	768	GO:0015727	0.006
160	2196	GO:0090074	0.006
161	489	GO:0007062	0.006
162	1621	GO:0046485	0.006
163	2147	GO:0071956	0.006
164	1688	GO:0048318	0.006
165	1101	GO:0032116	0.006
166	1914	GO:0060236	0.006
167	589	GO:0008347	0.006
168	2278	GO:2000620	0.005
169	1662	GO:0047293	0.005
170	1094	GO:0031988	0.005
171	749	GO:0015129	0.005
172	2125	GO:0071559	0.005
173	684	GO:0010616	0.005
174	2055	GO:0070295	0.005
175	843	GO:0017082	0.005
176	298	GO:0004677	0.005
177	1527	GO:0045296	0.005
178	509	GO:0007126	0.005
179	936	GO:0030030	0.005
180	1137	GO:0032463	0.005
181	1314	GO:0035855	0.005
182	2199	GO:0090169	0.005
183	55	GO:0000444	0.005
184	721	GO:0010972	0.005
185	727	GO:0012501	0.005
186	1295	GO:0035491	0.005
187	1268	GO:0035140	0.005
188	450	GO:0006513	0.005
189	2002	GO:0060789	0.005
190	784	GO:0016082	0.005
191	1816	GO:0051310	0.005
192	249	GO:0003231	0.005
193	207	GO:0002162	0.005
194	1517	GO:0045178	0.005
195	665	GO:0010333	0.005
196	513	GO:0007141	0.005
197	1948	GO:0060449	0.005
198	570	GO:0008127	0.005
199	1196	GO:0033594	0.005
200	449	GO:0006470	0.005
201	1515	GO:0045175	0.005
202	1306	GO:0035708	0.005
203	1018	GO:0030893	0.005
204	1140	GO:0032509	0.005
205	1659	GO:0046985	0.005
206	507	GO:0007108	0.005
207	729	GO:0012507	0.005
208	1524	GO:0045239	0.005
209	2038	GO:0070022	0.005
210	1264	GO:0035065	0.005
211	1750	GO:0048878	0.005
212	2277	GO:2000617	0.005
213	2003	GO:0060804	0.005
214	342	GO:0005452	0.005
215	597	GO:0008420	0.005
216	89	GO:0000900	0.005
217	821	GO:0016590	0.005
218	138	GO:0001669	0.005
219	567	GO:0008089	0.005
220	1179	GO:0033153	0.005
221	2004	GO:0060821	0.005
222	720	GO:0010966	0.005
223	128	GO:0001560	0.005
224	1214	GO:0034088	0.005
225	1848	GO:0051754	0.005
226	1161	GO:0032916	0.005
227	663	GO:0010266	0.005
228	617	GO:0008965	0.005
229	91	GO:0000915	0.005
230	1439	GO:0043296	0.005
231	715	GO:0010936	0.005
232	787	GO:0016191	0.005
233	2251	GO:2000144	0.005
234	2146	GO:0071954	0.005
235	2088	GO:0070887	0.005
236	1105	GO:0032142	0.005
237	2043	GO:0070086	0.005
238	475	GO:0006975	0.005
239	1320	GO:0035994	0.005
240	706	GO:0010862	0.005
241	696	GO:0010738	0.005
242	872	GO:0019206	0.005
243	1195	GO:0033593	0.005
244	975	GO:0030379	0.005
245	1496	GO:0044425	0.005
246	1157	GO:0032876	0.005
247	795	GO:0016324	0.004
248	2310	GO:2001271	0.004
249	686	GO:0010626	0.004
250	308	GO:0004725	0.004
251	2173	GO:0072300	0.004
252	2071	GO:0070512	0.004
253	841	GO:0017048	0.004
254	1236	GO:0034595	0.004
255	710	GO:0010894	0.004
256	1807	GO:0051271	0.004
257	913	GO:0021785	0.004
258	1812	GO:0051292	0.004
259	2192	GO:0090003	0.004
260	252	GO:0003273	0.004
261	747	GO:0015002	0.004
262	1705	GO:0048589	0.004
263	2047	GO:0070181	0.004
264	363	GO:0005608	0.004
265	440	GO:0006344	0.004
266	770	GO:0015807	0.004
267	1857	GO:0051891	0.004
268	343	GO:0005488	0.004
269	1307	GO:0035709	0.004
270	510	GO:0007127	0.004
271	1002	GO:0030660	0.004
272	220	GO:0002495	0.004
273	1046	GO:0031265	0.004
274	1183	GO:0033205	0.004
275	549	GO:0007500	0.004
276	2202	GO:0090219	0.004
277	1242	GO:0034676	0.004
278	228	GO:0002684	0.004
279	1434	GO:0043254	0.004
280	259	GO:0003334	0.004
281	23	GO:0000098	0.004
282	1144	GO:0032584	0.004
283	1737	GO:0048812	0.004
284	2289	GO:2000779	0.004
285	2107	GO:0071258	0.004
286	49	GO:0000381	0.004
287	1274	GO:0035234	0.004
288	1388	GO:0042799	0.004
289	1033	GO:0031081	0.004
290	2078	GO:0070577	0.004
291	1678	GO:0048185	0.004
292	2282	GO:2000721	0.004
293	1081	GO:0031619	0.004
294	278	GO:0003953	0.004
295	2269	GO:2000467	0.004
296	881	GO:0019646	0.004
297	803	GO:0016447	0.004
298	1424	GO:0043175	0.004
299	403	GO:0005969	0.004
300	1805	GO:0051256	0.004
301	2082	GO:0070700	0.004
302	210	GO:0002215	0.004
303	344	GO:0005496	0.004
304	459	GO:0006865	0.004
305	1588	GO:0045862	0.004
306	873	GO:0019208	0.004
307	2302	GO:2001027	0.004
308	1396	GO:0042985	0.004
309	261	GO:0003382	0.004
310	456	GO:0006780	0.004
311	496	GO:0007088	0.004
312	2222	GO:0097157	0.004
313	2029	GO:0061302	0.004
314	1923	GO:0060318	0.004
315	1132	GO:0032405	0.004
316	1096	GO:0032023	0.004
317	1273	GO:0035196	0.004
318	1769	GO:0050773	0.004
319	56	GO:0000506	0.004
320	997	GO:0030616	0.004
321	1294	GO:0035428	0.004
322	1957	GO:0060523	0.004
323	909	GO:0021695	0.004
324	1250	GO:0034773	0.004
325	627	GO:0009267	0.004
326	2042	GO:0070064	0.003
327	1512	GO:0045143	0.004
328	2284	GO:2000726	0.004
329	443	GO:0006354	0.003
330	602	GO:0008509	0.003
331	1049	GO:0031298	0.003
332	1504	GO:0045103	0.004
333	1634	GO:0046632	0.003
334	786	GO:0016189	0.003
335	1536	GO:0045502	0.003
336	426	GO:0006301	0.003
337	2272	GO:2000504	0.003
338	754	GO:0015181	0.003
339	201	GO:0002079	0.003
340	1537	GO:0045542	0.003
341	1017	GO:0030892	0.003
342	1029	GO:0031056	0.003
343	559	GO:0008013	0.003
344	592	GO:0008356	0.003
345	701	GO:0010771	0.003
346	1228	GO:0034451	0.003
347	386	GO:0005795	0.003
348	642	GO:0009877	0.003
349	1617	GO:0046332	0.003
350	2219	GO:0097100	0.003
351	1692	GO:0048386	0.003
352	481	GO:0007028	0.003
353	1279	GO:0035261	0.003
354	2104	GO:0071168	0.003
355	1922	GO:0060317	0.003
356	1173	GO:0033128	0.003
357	66	GO:0000739	0.003
358	284	GO:0004314	0.003
359	1490	GO:0044030	0.003
360	358	GO:0005588	0.003
361	1194	GO:0033578	0.003
362	2086	GO:0070816	0.003
363	1514	GO:0045171	0.003
364	1126	GO:0032354	0.003
365	2073	GO:0070531	0.003
366	1505	GO:0045109	0.003
367	1547	GO:0045616	0.003
368	27	GO:0000145	0.003
369	947	GO:0030174	0.003
370	618	GO:0008967	0.003
371	693	GO:0010694	0.003
372	680	GO:0010571	0.003
373	352	GO:0005534	0.003
374	2059	GO:0070317	0.003
375	16	GO:0000083	0.003
376	574	GO:0008147	0.003
377	2218	GO:0097070	0.003
378	1285	GO:0035330	0.003
379	775	GO:0015876	0.003
380	529	GO:0007276	0.003
381	1995	GO:0060761	0.003
382	532	GO:0007286	0.003
383	1374	GO:0042578	0.003
384	800	GO:0016363	0.003
385	357	GO:0005586	0.003
386	1411	GO:0043086	0.003
387	719	GO:0010952	0.003
388	817	GO:0016581	0.003
389	1735	GO:0048762	0.003
390	605	GO:0008574	0.003
391	1649	GO:0046831	0.003
392	750	GO:0015149	0.003
393	2172	GO:0072278	0.003
394	78	GO:0000794	0.003
395	1058	GO:0031396	0.003
396	337	GO:0005178	0.003
397	763	GO:0015377	0.003
398	2046	GO:0070173	0.003
399	765	GO:0015629	0.003
400	944	GO:0030140	0.003
401	1614	GO:0046318	0.003
402	390	GO:0005828	0.003
403	156	GO:0001787	0.003
404	2051	GO:0070221	0.003
405	272	GO:0003712	0.003
406	2308	GO:2001241	0.003
407	1863	GO:0051901	0.003
408	875	GO:0019212	0.003
409	774	GO:0015867	0.003
410	1628	GO:0046600	0.003
411	347	GO:0005518	0.003
412	1875	GO:0055008	0.003
413	603	GO:0008521	0.003
414	445	GO:0006409	0.003
415	2161	GO:0072144	0.003
416	1249	GO:0034770	0.003
417	2316	hsa04110	0.003
418	814	GO:0016574	0.003
419	1720	GO:0048671	0.003
420	1879	GO:0055037	0.003
421	1036	GO:0031102	0.003
422	1956	GO:0060520	0.003
423	1003	GO:0030690	0.003
424	1681	GO:0048227	0.002
425	2273	GO:2000587	0.002
426	1324	GO:0038007	0.002
427	1845	GO:0051684	0.002
428	626	GO:0009263	0.002
429	1939	GO:0060433	0.002
430	202	GO:0002080	0.002
431	1757	GO:0050658	0.002
432	751	GO:0015171	0.002
433	1627	GO:0046580	0.002
434	1501	GO:0045023	0.002
435	1060	GO:0031427	0.002
436	1937	GO:0060420	0.002
437	2157	GO:0072133	0.002
438	58	GO:0000710	0.002
439	353	GO:0005540	0.002
440	2126	GO:0071564	0.002
441	1491	GO:0044091	0.002
442	726	GO:0010997	0.002
443	1142	GO:0032548	0.002
444	773	GO:0015827	0.002
445	923	GO:0021978	0.002
446	576	GO:0008156	0.002
447	1384	GO:0042759	0.002
448	674	GO:0010485	0.002
449	360	GO:0005595	0.002
450	254	GO:0003283	0.002
451	72	GO:0000780	0.002
452	1129	GO:0032370	0.002
453	998	GO:0030617	0.002
454	294	GO:0004663	0.002
455	1084	GO:0031643	0.002
456	698	GO:0010757	0.002
457	2186	GO:0072686	0.002
458	1886	GO:0055108	0.002
459	442	GO:0006353	0.002
460	1915	GO:0060242	0.002
461	2129	GO:0071681	0.002
462	1361	GO:0042415	0.002
463	470	GO:0006930	0.002
464	40	GO:0000228	0.002
465	2266	GO:2000401	0.002
466	1442	GO:0043368	0.002
467	258	GO:0003333	0.002
468	1189	GO:0033484	0.002
469	1464	GO:0043518	0.002
470	1077	GO:0031576	0.002
471	2070	GO:0070507	0.002
472	1583	GO:0045799	0.002
473	2095	GO:0070974	0.002
474	1232	GO:0034509	0.002
475	1902	GO:0060128	0.002
476	830	GO:0016817	0.002
477	548	GO:0007497	0.002
478	995	GO:0030530	0.002
479	561	GO:0008037	0.002
480	799	GO:0016344	0.002
481	139	GO:0001672	0.002
482	1803	GO:0051247	0.002
483	2279	GO:2000648	0.002
484	1612	GO:0046092	0.002
485	2075	GO:0070551	0.002
486	1201	GO:0033629	0.002
487	18	GO:0000085	0.002
488	1335	GO:0040023	0.002
489	979	GO:0030449	0.002
490	771	GO:0015825	0.002
491	2221	GO:0097150	0.002
492	2067	GO:0070463	0.002
493	752	GO:0015175	0.002
494	2183	GO:0072563	0.002
495	724	GO:0010991	0.002
496	2130	GO:0071732	0.002
497	863	GO:0018277	0.002
498	2158	GO:0072134	0.002
499	471	GO:0006956	0.002
500	415	GO:0006261	0.002
501	2163	GO:0072160	0.002
502	579	GO:0008209	0.002
503	910	GO:0021702	0.002
504	310	GO:0004748	0.002
505	670	GO:0010465	0.002
506	1377	GO:0042587	0.002
507	1202	GO:0033631	0.002
508	1404	GO:0043047	0.002
509	65	GO:0000733	0.002
510	1289	GO:0035371	0.002
511	2068	GO:0070483	0.002
512	753	GO:0015179	0.002
513	539	GO:0007402	0.002
514	148	GO:0001740	0.002
515	1911	GO:0060217	0.002
516	1565	GO:0045720	0.002
517	584	GO:0008283	0.002
518	2106	GO:0071253	0.002
519	1372	GO:0042552	0.001
520	282	GO:0004137	0.001
521	600	GO:0008432	0.001
522	758	GO:0015194	0.001
523	2122	GO:0071481	0.001
524	1177	GO:0033145	0.002
525	942	GO:0030100	0.001
526	1728	GO:0048713	0.001
527	983	GO:0030500	0.001
528	28	GO:0000150	0.001
529	160	GO:0001825	0.001
530	2081	GO:0070683	0.001
531	324	GO:0005070	0.001
532	1817	GO:0051322	0.001
533	1756	GO:0050431	0.001
534	1212	GO:0034063	0.001
535	150	GO:0001743	0.001
536	1511	GO:0045132	0.001
537	371	GO:0005662	0.001
538	462	GO:0006883	0.001
539	1892	GO:0060021	0.001
540	499	GO:0007091	0.001
541	2019	GO:0061090	0.001
542	1773	GO:0050820	0.001
543	606	GO:0008601	0.001
544	1401	GO:0043015	0.001
545	1034	GO:0031098	0.001
546	1850	GO:0051782	0.001
547	356	GO:0005581	0.001
548	2090	GO:0070914	0.001
549	1853	GO:0051797	0.001
550	564	GO:0008052	0.001
551	691	GO:0010669	0.001
552	1977	GO:0060687	0.001
553	2262	GO:2000373	0.001
554	355	GO:0005579	0.001
555	2017	GO:0061045	0.001
556	1930	GO:0060375	0.001
557	673	GO:0010484	0.001
558	1220	GO:0034237	0.001
559	713	GO:0010922	0.001
560	1283	GO:0035279	0.001
561	1484	GO:0043697	0.001
562	2248	GO:2000121	0.001
563	392	GO:0005873	0.001
564	362	GO:0005606	0.001
565	1147	GO:0032784	0.001
566	1026	GO:0031032	0.001
567	1574	GO:0045749	0.001
568	2009	GO:0060900	0.001
569	1630	GO:0046602	0.001
570	1426	GO:0043220	0.001
571	1116	GO:0032290	0.001
572	1679	GO:0048208	0.001
573	2288	GO:2000774	0.001
574	1231	GO:0034504	0.001
575	1595	GO:0045910	0.001
576	1037	GO:0031104	0.001
577	452	GO:0006536	0.001
578	769	GO:0015755	0.001
579	92	GO:0000921	0.001
580	871	GO:0019102	0.001
581	852	GO:0017166	0.001
582	1596	GO:0045916	0.001
583	2148	GO:0072015	0.001
584	96	GO:0000940	0.001
585	29	GO:0000151	0.001
586	1804	GO:0051248	0.001
587	827	GO:0016791	0.001
588	59	GO:0000712	0.001
589	1393	GO:0042954	0.001
590	1182	GO:0033193	0.001
591	1021	GO:0030951	0.001
592	2323	hsa04144	0.001
593	1360	GO:0042405	0.001
594	134	GO:0001656	0.001
595	1430	GO:0043236	0.001
596	1097	GO:0032025	0.001
597	2154	GO:0072102	0.001
598	1809	GO:0051276	0.001
599	2300	GO:2001020	0.001
600	303	GO:0004712	0.001
601	1240	GO:0034648	0.001
602	735	GO:0014037	0.001
603	572	GO:0008138	0.001
604	262	GO:0003383	0.001
605	45	GO:0000287	0.001
606	1253	GO:0035020	0.001
607	473	GO:0006958	0.001
608	2096	GO:0070975	0.001
609	95	GO:0000939	0.001
610	224	GO:0002576	0.001
611	838	GO:0016934	0.001
612	1798	GO:0051168	0.001
613	2290	GO:2000780	0.001
614	1104	GO:0032139	0.001
615	1651	GO:0046855	0.001
616	2303	GO:2001038	0.001
617	926	GO:0022027	0.001
618	2110	GO:0071335	0.001
619	297	GO:0004675	0.001
620	2005	GO:0060823	0.001
621	2132	GO:0071778	0.001
622	954	GO:0030220	0.001
623	682	GO:0010593	0.001
624	1785	GO:0051054	0.001
625	1291	GO:0035402	0.001
626	1217	GO:0034121	0.001
627	1890	GO:0060017	0
628	810	GO:0016568	0
629	932	GO:0022824	0
630	1298	GO:0035507	0
631	127	GO:0001558	0
632	1585	GO:0045842	0
633	1171	GO:0033088	0
634	1345	GO:0042132	0
635	685	GO:0010625	0
636	590	GO:0008353	0
637	889	GO:0019853	0
638	1048	GO:0031297	0
639	405	GO:0005979	0
640	1165	GO:0032967	0
641	1309	GO:0035748	0
642	1494	GO:0044354	0
643	1375	GO:0042583	0
644	1262	GO:0035054	0
645	1656	GO:0046975	0
646	1270	GO:0035173	0
647	2134	GO:0071813	0
648	169	GO:0001841	0
649	2099	GO:0071065	0
650	1348	GO:0042162	0
651	912	GO:0021773	0
652	2030	GO:0061304	0
653	1400	GO:0043009	0
654	1601	GO:0045945	0
655	1039	GO:0031146	0
656	404	GO:0005971	0
657	1666	GO:0047496	0
658	989	GO:0030512	0
659	1266	GO:0035098	0
660	1642	GO:0046689	0
661	2255	GO:2000276	0
662	87	GO:0000819	0
663	1124	GO:0032321	0
664	2045	GO:0070123	0
665	955	GO:0030221	0
666	1431	GO:0043237	0
667	1302	GO:0035562	0
668	1888	GO:0060004	0
669	2127	GO:0071565	0
670	862	GO:0018205	0
671	890	GO:0019897	0
672	502	GO:0007094	0
673	131	GO:0001570	0
674	2021	GO:0061146	0
675	2297	GO:2001014	0
676	533	GO:0007342	0
677	2296	GO:2001013	0
678	1436	GO:0043259	0
679	993	GO:0030521	0
680	2062	GO:0070410	0
681	419	GO:0006270	0
682	981	GO:0030479	0
683	1007	GO:0030844	0
684	781	GO:0016043	0
685	1690	GO:0048333	0
686	1433	GO:0043252	0
687	214	GO:0002328	0
688	1860	GO:0051895	0
689	140	GO:0001673	0
690	886	GO:0019835	0
691	1521	GO:0045197	0
692	1243	GO:0034699	0
693	1151	GO:0032810	0
694	654	GO:0010070	0
695	1465	GO:0043519	0
696	1369	GO:0042524	0
697	1293	GO:0035407	0
698	395	GO:0005902	0
699	463	GO:0006888	0
700	660	GO:0010226	0
701	1898	GO:0060068	0
702	1489	GO:0043968	0
703	2293	GO:2000802	0
704	813	GO:0016572	0
705	986	GO:0030509	0
706	562	GO:0008043	0
707	86	GO:0000808	0
708	849	GO:0017124	0
709	1838	GO:0051580	0
710	153	GO:0001763	0
711	884	GO:0019789	0
712	677	GO:0010506	0
713	1481	GO:0043626	0
714	336	GO:0005176	0
715	437	GO:0006337	0
716	683	GO:0010594	0
717	117	GO:0001106	0
718	1437	GO:0043260	0
719	2139	GO:0071901	0
720	13	GO:0000079	0
721	1277	GO:0035257	0
722	850	GO:0017137	0
723	151	GO:0001755	0
724	30	GO:0000159

## Sheet: Dateset5 MaxRel Table
Order	Feature	Name	Score
1	421	GO:0004677	0.045
2	2550	GO:0048733	0.042
3	841	GO:0008283	0.042
4	1475	GO:0031081	0.041
5	472	GO:0005072	0.04
6	696	GO:0007049	0.037
7	3140	GO:0071559	0.036
8	3099	GO:0071168	0.035
9	1972	GO:0042159	0.035
10	2220	GO:0045143	0.035
11	3364	GO:2000617	0.035
12	3365	GO:2000620	0.035
13	3062	GO:0070512	0.035
14	1126	GO:0016363	0.034
15	1517	GO:0031436	0.034
16	2490	GO:0048333	0.034
17	1847	GO:0035173	0.033
18	2347	GO:0045943	0.033
19	101	GO:0000808	0.033
20	804	GO:0008013	0.033
21	3425	hsa04110	0.033
22	3383	GO:2000773	0.033
23	702	GO:0007062	0.032
24	106	GO:0000915	0.032
25	720	GO:0007108	0.032
26	1335	GO:0030056	0.032
27	2761	GO:0051726	0.032
28	3193	GO:0072134	0.031
29	3192	GO:0072133	0.031
30	825	GO:0008156	0.031
31	1944	GO:0040001	0.031
32	716	GO:0007095	0.031
33	2499	GO:0048478	0.031
34	555	GO:0005813	0.031
35	606	GO:0006268	0.03
36	1887	GO:0035520	0.03
37	2805	GO:0060020	0.03
38	2335	GO:0045875	0.03
39	3195	GO:0072138	0.03
40	2744	GO:0051571	0.03
41	108	GO:0000922	0.03
42	2392	GO:0046632	0.03
43	2703	GO:0051292	0.03
44	1301	GO:0021873	0.03
45	2101	GO:0043254	0.03
46	3125	GO:0071398	0.03
47	1697	GO:0032993	0.03
48	257	GO:0002102	0.03
49	2881	GO:0060449	0.03
50	16	GO:0000079	0.03
51	2567	GO:0048859	0.03
52	69	GO:0000578	0.029
53	2764	GO:0051782	0.029
54	2663	GO:0051041	0.029
55	881	GO:0009048	0.029
56	97	GO:0000800	0.029
57	1304	GO:0021889	0.029
58	2864	GO:0060394	0.029
59	722	GO:0007126	0.028
60	1534	GO:0031572	0.028
61	2699	GO:0051276	0.028
62	712	GO:0007091	0.028
63	2547	GO:0048715	0.028
64	1246	GO:0019899	0.028
65	267	GO:0002244	0.028
66	1717	GO:0033153	0.028
67	3367	GO:2000648	0.028
68	3038	GO:0070314	0.028
69	1723	GO:0033205	0.028
70	2917	GO:0060623	0.028
71	2403	GO:0046680	0.028
72	2782	GO:0051987	0.028
73	3109	GO:0071283	0.028
74	601	GO:0006259	0.028
75	839	GO:0008278	0.027
76	2383	GO:0046600	0.027
77	843	GO:0008285	0.027
78	1851	GO:0035234	0.027
79	429	GO:0004712	0.027
80	2517	GO:0048589	0.027
81	93	GO:0000794	0.027
82	1421	GO:0030616	0.027
83	3196	GO:0072144	0.027
84	3151	GO:0071777	0.027
85	2710	GO:0051310	0.027
86	22	GO:0000087	0.027
87	1802	GO:0034509	0.027
88	563	GO:0005873	0.027
89	1123	GO:0016342	0.027
90	3218	GO:0072300	0.027
91	2284	GO:0045668	0.027
92	2766	GO:0051797	0.027
93	1540	GO:0031619	0.027
94	958	GO:0010485	0.027
95	1954	GO:0040038	0.027
96	1740	GO:0033593	0.027
97	3148	GO:0071681	0.026
98	47	GO:0000228	0.026
99	2934	GO:0060710	0.026
100	3127	GO:0071407	0.026
101	3073	GO:0070683	0.026
102	2754	GO:0051649	0.026
103	863	GO:0008574	0.026
104	82	GO:0000775	0.026
105	508	GO:0005521	0.026
106	556	GO:0005815	0.026
107	1048	GO:0014010	0.026
108	2694	GO:0051256	0.026
109	1786	GO:0034333	0.026
110	1041	GO:0010997	0.026
111	582	GO:0005971	0.026
112	3363	GO:2000615	0.026
113	1001	GO:0010767	0.026
114	682	GO:0006974	0.026
115	2212	GO:0045103	0.026
116	623	GO:0006303	0.026
117	2906	GO:0060565	0.026
118	48	GO:0000236	0.026
119	700	GO:0007057	0.026
120	1750	GO:0033629	0.026
121	398	GO:0004415	0.026
122	2593	GO:0050680	0.026
123	683	GO:0006975	0.026
124	2554	GO:0048762	0.026
125	947	GO:0010389	0.026
126	1577	GO:0032077	0.026
127	2167	GO:0043626	0.026
128	70	GO:0000701	0.026
129	2137	GO:0043517	0.025
130	2091	GO:0043220	0.025
131	87	GO:0000780	0.025
132	3054	GO:0070463	0.025
133	2229	GO:0045197	0.025
134	212	GO:0001889	0.025
135	2542	GO:0048709	0.025
136	382	GO:0003918	0.025
137	2513	GO:0048565	0.025
138	1217	GO:0019206	0.025
139	134	GO:0001300	0.025
140	2796	GO:0055096	0.025
141	1688	GO:0032916	0.025
142	146	GO:0001556	0.025
143	2905	GO:0060564	0.024
144	2798	GO:0055100	0.024
145	920	GO:0009912	0.024
146	111	GO:0000942	0.024
147	935	GO:0010159	0.024
148	1694	GO:0032967	0.024
149	1157	GO:0016799	0.024
150	387	GO:0004003	0.024
151	2237	GO:0045296	0.024
152	2346	GO:0045931	0.024
153	2527	GO:0048638	0.024
154	2975	GO:0061035	0.024
155	2691	GO:0051233	0.024
156	1768	GO:0034088	0.024
157	1744	GO:0033600	0.024
158	1753	GO:0033673	0.024
159	1498	GO:0031297	0.024
160	957	GO:0010484	0.024
161	2809	GO:0060044	0.024
162	1050	GO:0014013	0.024
163	19	GO:0000083	0.024
164	2266	GO:0045605	0.024
165	2620	GO:0050773	0.024
166	1021	GO:0010894	0.024
167	3075	GO:0070700	0.024
168	1393	GO:0030337	0.023
169	3311	GO:2000036	0.023
170	1961	GO:0042063	0.023
171	1704	GO:0033088	0.023
172	1514	GO:0031427	0.023
173	2748	GO:0051580	0.023
174	2423	GO:0046903	0.023
175	2196	GO:0044464	0.023
176	975	GO:0010625	0.023
177	3	GO:0000018	0.023
178	3289	GO:0097149	0.023
179	775	GO:0007403	0.023
180	1713	GO:0033148	0.023
181	2078	GO:0043148	0.023
182	2270	GO:0045624	0.023
183	491	GO:0005178	0.023
184	1422	GO:0030617	0.023
185	2329	GO:0045843	0.023
186	128	GO:0001102	0.023
187	1763	GO:0033993	0.023
188	2170	GO:0043697	0.023
189	3421	hsa03410	0.023
190	365	GO:0003691	0.023
191	3459	hsa03450	0.023
192	1742	GO:0033596	0.023
193	3246	GO:0090007	0.023
194	2981	GO:0061045	0.023
195	3303	GO:1900625	0.023
196	1969	GO:0042127	0.023
197	3212	GO:0072207	0.023
198	2062	GO:0043089	0.023
199	1337	GO:0030097	0.023
200	791	GO:0007507	0.023
201	2927	GO:0060686	0.023
202	2548	GO:0048729	0.023
203	3119	GO:0071363	0.023
204	2531	GO:0048660	0.023
205	1004	GO:0010801	0.022
206	1730	GO:0033484	0.022
207	161	GO:0001657	0.022
208	2326	GO:0045839	0.022
209	1284	GO:0021695	0.022
210	5	GO:0000022	0.022
211	3409	GO:2001241	0.022
212	2265	GO:0045603	0.022
213	1024	GO:0010909	0.022
214	3042	GO:0070369	0.022
215	2186	GO:0044334	0.022
216	634	GO:0006344	0.022
217	2487	GO:0048318	0.022
218	1348	GO:0030174	0.022
219	3048	GO:0070411	0.022
220	137	GO:0001503	0.022
221	3094	GO:0071107	0.022
222	1850	GO:0035196	0.022
223	1884	GO:0035501	0.022
224	83	GO:0000776	0.022
225	3374	GO:2000685	0.022
226	1883	GO:0035500	0.022
227	1924	GO:0035987	0.022
228	320	GO:0003131	0.022
229	1921	GO:0035978	0.022
230	3399	GO:2001033	0.022
231	1466	GO:0031052	0.022
232	1683	GO:0032876	0.022
233	2863	GO:0060393	0.022
234	663	GO:0006910	0.022
235	59	GO:0000380	0.022
236	2076	GO:0043140	0.022
237	3137	GO:0071514	0.022
238	976	GO:0010626	0.022
239	1960	GO:0042060	0.022
240	507	GO:0005520	0.022
241	824	GO:0008147	0.022
242	2997	GO:0061304	0.022
243	1448	GO:0030879	0.022
244	3323	GO:2000121	0.022
245	1971	GO:0042153	0.022
246	159	GO:0001655	0.022
247	2832	GO:0060209	0.022
248	2050	GO:0043015	0.022
249	2214	GO:0045120	0.022
250	102	GO:0000819	0.022
251	120	GO:0001042	0.022
252	531	GO:0005657	0.022
253	2215	GO:0045121	0.022
254	2158	GO:0043570	0.022
255	704	GO:0007064	0.022
256	3300	GO:1900215	0.022
257	3301	GO:1900218	0.022
258	1942	GO:0039003	0.022
259	3359	GO:2000594	0.022
260	3219	GO:0072305	0.022
261	3299	GO:1900212	0.022
262	2687	GO:0051216	0.022
263	2060	GO:0043085	0.022
264	890	GO:0009263	0.022
265	439	GO:0004748	0.022
266	612	GO:0006281	0.022
267	2781	GO:0051984	0.022
268	719	GO:0007100	0.022
269	2822	GO:0060123	0.022
270	3256	GO:0090166	0.022
271	96	GO:0000797	0.022
272	2278	GO:0045662	0.022
273	894	GO:0009314	0.022
274	1801	GO:0034504	0.022
275	349	GO:0003334	0.022
276	2002	GO:0042493	0.022
277	2777	GO:0051901	0.022
278	2011	GO:0042555	0.022
279	1494	GO:0031262	0.022
280	607	GO:0006270	0.022
281	1758	GO:0033690	0.021
282	2162	GO:0043596	0.021
283	1875	GO:0035404	0.021
284	1028	GO:0010936	0.021
285	2908	GO:0060574	0.021
286	1848	GO:0035174	0.021
287	2873	GO:0060433	0.021
288	872	GO:0008630	0.021
289	92	GO:0000793	0.021
290	713	GO:0007092	0.021
291	2952	GO:0060769	0.021
292	2854	GO:0060336	0.021
293	2286	GO:0045670	0.021
294	1916	GO:0035799	0.021
295	21	GO:0000085	0.021
296	1139	GO:0016570	0.021
297	1319	GO:0022027	0.021
298	252	GO:0002072	0.021
299	3226	GO:0072563	0.021
300	3055	GO:0070483	0.021
301	3077	GO:0070734	0.021
302	1958	GO:0042058	0.021
303	1138	GO:0016538	0.021
304	1261	GO:0019985	0.021
305	613	GO:0006282	0.021
306	2408	GO:0046785	0.021
307	2497	GO:0048471	0.021
308	2856	GO:0060363	0.021
309	2372	GO:0046332	0.021
310	925	GO:0009986	0.021
311	726	GO:0007141	0.021
312	2966	GO:0060923	0.021
313	2493	GO:0048386	0.021
314	2048	GO:0043009	0.021
315	3243	GO:0090003	0.021
316	2956	GO:0060789	0.021
317	1404	GO:0030500	0.021
318	2814	GO:0060059	0.021
319	2244	GO:0045404	0.021
320	1816	GO:0034722	0.021
321	1686	GO:0032909	0.021
322	3348	GO:2000467	0.021
323	3179	GO:0072044	0.021
324	1323	GO:0022408	0.021
325	3400	GO:2001038	0.021
326	363	GO:0003689	0.021
327	2838	GO:0060236	0.021
328	505	GO:0005515	0.021
329	1935	GO:0038028	0.021
330	117	GO:0000987	0.021
331	1069	GO:0014912	0.021
332	1235	GO:0019724	0.021
333	2043	GO:0042992	0.021
334	43	GO:0000189	0.021
335	2727	GO:0051444	0.021
336	2288	GO:0045682	0.021
337	3483	hsa04350	0.021
338	828	GO:0008201	0.021
339	1403	GO:0030496	0.021
340	892	GO:0009294	0.021
341	2683	GO:0051154	0.021
342	2899	GO:0060548	0.021
343	1615	GO:0032355	0.021
344	1381	GO:0030308	0.021
345	2674	GO:0051103	0.021
346	3191	GO:0072125	0.021
347	381	GO:0003916	0.021
348	1588	GO:0032154	0.021
349	3202	GO:0072179	0.021
350	3111	GO:0071305	0.021
351	788	GO:0007500	0.021
352	3095	GO:0071141	0.021
353	2634	GO:0050820	0.021
354	1219	GO:0019211	0.021
355	2360	GO:0046078	0.021
356	885	GO:0009157	0.021
357	598	GO:0006231	0.021
358	444	GO:0004799	0.021
359	1213	GO:0019088	0.021
360	1033	GO:0010952	0.021
361	2942	GO:0060743	0.021
362	2260	GO:0045597	0.021
363	1967	GO:0042116	0.021
364	2850	GO:0060317	0.021
365	2224	GO:0045177	0.021
366	343	GO:0003289	0.021
367	1724	GO:0033261	0.021
368	2411	GO:0046826	0.02
369	2876	GO:0060440	0.02
370	1526	GO:0031523	0.02
371	2747	GO:0051575	0.02
372	419	GO:0004674	0.02
373	1553	GO:0031798	0.02
374	327	GO:0003180	0.02
375	1936	GO:0038052	0.02
376	1321	GO:0022405	0.02
377	1500	GO:0031301	0.02
378	558	GO:0005819	0.02
379	1524	GO:0031507	0.02
380	1741	GO:0033594	0.02
381	109	GO:0000939	0.02
382	76	GO:0000723	0.02
383	1866	GO:0035330	0.02
384	2465	GO:0048145	0.02
385	461	GO:0005006	0.02
386	1543	GO:0031641	0.02
387	1531	GO:0031536	0.02
388	2250	GO:0045445	0.02
389	2887	GO:0060492	0.02
390	1842	GO:0035117	0.02
391	2757	GO:0051668	0.02
392	1317	GO:0022009	0.02
393	3280	GO:0090400	0.02
394	10	GO:0000070	0.02
395	2651	GO:0050902	0.02
396	2707	GO:0051301	0.02
397	341	GO:0003279	0.02
398	605	GO:0006266	0.02
399	933	GO:0010070	0.02
400	3019	GO:0070173	0.02
401	1645	GO:0032570	0.02
402	1389	GO:0030332	0.02
403	1046	GO:0014002	0.02
404	2332	GO:0045862	0.02
405	2389	GO:0046626	0.02
406	506	GO:0005518	0.02
407	2745	GO:0051573	0.02
408	799	GO:0007596	0.02
409	974	GO:0010616	0.02
410	1479	GO:0031098	0.02
411	2811	GO:0060051	0.02
412	2359	GO:0046060	0.02
413	1568	GO:0031988	0.02
414	709	GO:0007088	0.02
415	3385	GO:2000778	0.02
416	3377	GO:2000726	0.02
417	627	GO:0006310	0.02
418	2957	GO:0060804	0.02
419	3205	GO:0072189	0.02
420	2980	GO:0061044	0.02
421	1598	GO:0032275	0.02
422	23	GO:0000088	0.02
423	3105	GO:0071258	0.02
424	2421	GO:0046884	0.02
425	1880	GO:0035491	0.02
426	1519	GO:0031442	0.02
427	2328	GO:0045842	0.02
428	938	GO:0010216	0.02
429	1677	GO:0032863	0.02
430	2126	GO:0043426	0.02
431	1859	GO:0035284	0.02
432	2089	GO:0043208	0.02
433	742	GO:0007179	0.02
434	987	GO:0010718	0.02
435	990	GO:0010742	0.02
436	2319	GO:0045786	0.02
437	891	GO:0009267	0.02
438	2298	GO:0045726	0.02
439	749	GO:0007221	0.02
440	3305	GO:2000005	0.02
441	3306	GO:2000007	0.02
442	3325	GO:2000137	0.02
443	2987	GO:0061151	0.02
444	3164	GO:0071893	0.02
445	2494	GO:0048392	0.02
446	2986	GO:0061149	0.02
447	2790	GO:0055020	0.02
448	3260	GO:0090194	0.02
449	44	GO:0000212	0.02
450	2990	GO:0061155	0.02
451	3206	GO:0072192	0.02
452	3210	GO:0072200	0.02
453	3209	GO:0072198	0.02
454	77	GO:0000724	0.02
455	3187	GO:0072101	0.02
456	3197	GO:0072161	0.02
457	2889	GO:0060503	0.02
458	2888	GO:0060502	0.02
459	3394	GO:2001012	0.02
460	937	GO:0010212	0.02
461	2911	GO:0060592	0.02
462	3186	GO:0072097	0.02
463	1584	GO:0032139	0.019
464	1062	GO:0014807	0.019
465	3004	GO:0061419	0.019
466	339	GO:0003270	0.019
467	2010	GO:0042552	0.019
468	1265	GO:0021515	0.019
469	337	GO:0003264	0.019
470	1315	GO:0021987	0.019
471	463	GO:0005010	0.019
472	3177	GO:0072033	0.019
473	785	GO:0007440	0.019
474	325	GO:0003160	0.019
475	2982	GO:0061047	0.019
476	2712	GO:0051329	0.019
477	1011	GO:0010837	0.019
478	602	GO:0006260	0.019
479	2951	GO:0060768	0.019
480	1856	GO:0035264	0.019
481	1473	GO:0031069	0.019
482	1796	GO:0034451	0.019
483	3327	GO:2000145	0.019
484	3375	GO:2000707	0.019
485	1551	GO:0031666	0.019
486	1623	GO:0032403	0.019
487	2946	GO:0060749	0.019
488	2187	GO:0044336	0.019
489	2144	GO:0043539	0.019
490	1313	GO:0021978	0.019
491	3061	GO:0070507	0.019
492	1641	GO:0032525	0.019
493	3479	hsa05222	0.019
494	1522	GO:0031492	0.019
495	173	GO:0001709	0.019
496	2868	GO:0060412	0.019
497	1248	GO:0019901	0.019
498	2342	GO:0045910	0.019
499	880	GO:0009008	0.019
500	955	GO:0010468	0.019
501	2552	GO:0048754	0.019
502	2770	GO:0051880	0.019
503	66	GO:0000405	0.019
504	2226	GO:0045179	0.019
505	194	GO:0001822	0.019
506	345	GO:0003308	0.019
507	71	GO:0000710	0.019
508	1585	GO:0032142	0.019
509	1193	GO:0018105	0.019
510	72	GO:0000712	0.019
511	3092	GO:0071062	0.019
512	1411	GO:0030513	0.019
513	1616	GO:0032357	0.019
514	715	GO:0007094	0.019
515	532	GO:0005658	0.019
516	1152	GO:0016628	0.019
517	84	GO:0000777	0.019
518	2159	GO:0043586	0.019
519	3313	GO:2000045	0.019
520	2227	GO:0045180	0.019
521	832	GO:0008239	0.019
522	1218	GO:0019208	0.019
523	1026	GO:0010922	0.019
524	2169	GO:0043652	0.019
525	2213	GO:0045109	0.019
526	2965	GO:0060916	0.019
527	2818	GO:0060068	0.019
528	2929	GO:0060688	0.019
529	1324	GO:0022409	0.019
530	3086	GO:0070887	0.019
531	3093	GO:0071065	0.019
532	276	GO:0002430	0.019
533	705	GO:0007067	0.019
534	691	GO:0007018	0.019
535	371	GO:0003777	0.019
536	2384	GO:0046601	0.019
537	701	GO:0007059	0.019
538	3469	hsa05200	0.019
539	1052	GO:0014037	0.019
540	2056	GO:0043066	0.019
541	787	GO:0007497	0.019
542	3115	GO:0071335	0.019
543	245	GO:0002043	0.019
544	1601	GO:0032290	0.019
545	2195	GO:0044430	0.019
546	1012	GO:0010862	0.019
547	2545	GO:0048713	0.019
548	237	GO:0002009	0.019
549	2410	GO:0046825	0.019
550	2117	GO:0043393	0.019
551	2928	GO:0060687	0.019
552	1441	GO:0030857	0.019
553	2697	GO:0051271	0.019
554	2330	GO:0045859	0.019
555	311	GO:0002904	0.019
556	3169	GO:0071930	0.019
557	1836	GO:0035065	0.019
558	1834	GO:0035051	0.019
559	886	GO:0009165	0.019
560	1208	GO:0019035	0.019
561	895	GO:0009330	0.019
562	629	GO:0006312	0.019
563	2334	GO:0045870	0.019
564	1427	GO:0030690	0.019
565	273	GO:0002331	0.018
566	1602	GO:0032298	0.018
567	2746	GO:0051574	0.018
568	168	GO:0001701	0.018
569	2690	GO:0051225	0.018
570	1743	GO:0033598	0.018
571	1107	GO:0016202	0.018
572	2817	GO:0060066	0.018
573	3463	hsa04114	0.018
574	200	GO:0001837	0.018
575	1839	GO:0035108	0.018
576	1299	GO:0021861	0.018
577	332	GO:0003203	0.018
578	1140	GO:0016572	0.018
579	2453	GO:0048015	0.018
580	350	GO:0003337	0.018
581	2209	GO:0045086	0.018
582	1459	GO:0030951	0.018
583	966	GO:0010564	0.018
584	2877	GO:0060441	0.018
585	1841	GO:0035116	0.018
586	1586	GO:0032143	0.018
587	1604	GO:0032301	0.018
588	3167	GO:0071901	0.018
589	723	GO:0007127	0.018
590	392	GO:0004146	0.018
591	3265	GO:0090267	0.018
592	3067	GO:0070557	0.018
593	1109	GO:0016242	0.018
594	3181	GO:0072053	0.018
595	2280	GO:0045664	0.018
596	3182	GO:0072054	0.018
597	3198	GO:0072162	0.018
598	621	GO:0006301	0.018
599	1725	GO:0033262	0.018
600	3312	GO:2000042	0.018
601	2316	GO:0045778	0.018
602	3168	GO:0071922	0.018
603	263	GO:0002204	0.018
604	628	GO:0006311	0.018
605	2218	GO:0045128	0.018
606	1161	GO:0016851	0.018
607	1100	GO:0015979	0.018
608	1101	GO:0015995	0.018
609	2077	GO:0043142	0.018
610	11	GO:0000072	0.018
611	2799	GO:0055105	0.018
612	2395	GO:0046651	0.018
613	2819	GO:0060074	0.018
614	586	GO:0006044	0.018
615	2057	GO:0043067	0.018
616	3360	GO:2000597	0.018
617	3002	GO:0061360	0.018
618	1280	GO:0021633	0.018
619	1281	GO:0021650	0.018
620	2803	GO:0060011	0.018
621	2845	GO:0060272	0.018
622	293	GO:0002576	0.018
623	2821	GO:0060113	0.018
624	3398	GO:2001027	0.018
625	3353	GO:2000504	0.018
626	3037	GO:0070306	0.018
627	3056	GO:0070487	0.018
628	1405	GO:0030501	0.018
629	2350	GO:0045950	0.018
630	2385	GO:0046602	0.018
631	490	GO:0005176	0.018
632	162	GO:0001658	0.018
633	2568	GO:0048863	0.018
634	89	GO:0000785	0.018
635	1872	GO:0035372	0.018
636	2463	GO:0048102	0.018
637	2254	GO:0045475	0.018
638	1409	GO:0030511	0.018
639	2740	GO:0051534	0.018
640	1706	GO:0033128	0.018
641	835	GO:0008262	0.018
642	847	GO:0008309	0.018
643	3069	GO:0070602	0.018
644	2914	GO:0060599	0.018
645	3000	GO:0061324	0.018
646	2481	GO:0048262	0.018
647	1631	GO:0032444	0.018
648	2885	GO:0060479	0.018
649	1464	GO:0030997	0.018
650	1840	GO:0035112	0.018
651	3384	GO:2000774	0.018
652	1410	GO:0030512	0.018
653	1587	GO:0032147	0.018
654	616	GO:0006287	0.018
655	1710	GO:0033137	0.018
656	1890	GO:0035566	0.018
657	2840	GO:0060252	0.018
658	1603	GO:0032299	0.018
659	869	GO:0008608	0.018
660	1867	GO:0035335	0.018
661	692	GO:0007019	0.017
662	1525	GO:0031508	0.017
663	2114	GO:0043372	0.017
664	1869	GO:0035359	0.017
665	1766	GO:0034056	0.017
666	2904	GO:0060561	0.017
667	218	GO:0001933	0.017
668	3041	GO:0070326	0.017
669	2741	GO:0051549	0.017
670	2831	GO:0060206	0.017
671	3135	GO:0071480	0.017
672	3242	GO:0085029	0.017
673	1592	GO:0032204	0.017
674	2312	GO:0045765	0.017
675	2363	GO:0046092	0.017
676	831	GO:0008238	0.017
677	1644	GO:0032548	0.017
678	391	GO:0004137	0.017
679	2896	GO:0060528	0.017
680	3397	GO:2001022	0.017
681	789	GO:0007501	0.017
682	2455	GO:0048024	0.017
683	1520	GO:0031464	0.017
684	511	GO:0005534	0.017
685	2518	GO:0048592	0.017
686	710	GO:0007089	0.017
687	805	GO:0008022	0.017
688	611	GO:0006275	0.017
689	2529	GO:0048645	0.017
690	1214	GO:0019102	0.017
691	2168	GO:0043627	0.017
692	669	GO:0006922	0.017
693	2682	GO:0051152	0.017
694	2073	GO:0043125	0.017
695	3091	GO:0070974	0.017
696	2296	GO:0045720	0.017
697	2893	GO:0060520	0.017
698	121	GO:0001046	0.017
699	3174	GO:0072001	0.017
700	3126	GO:0071404	0.017
701	644	GO:0006468	0.017
702	418	GO:0004672	0.017
703	1774	GO:0034121	0.017
704	3368	GO:2000653	0.017
705	2281	GO:0045665	0.017
706	2178	GO:0044029	0.017
707	2556	GO:0048793	0.017
708	2390	GO:0046627	0.017
709	1165	GO:0016891	0.017
710	1807	GO:0034616	0.017
711	3452	hsa05144	0.017
712	2313	GO:0045766	0.017
713	2592	GO:0050679	0.017
714	489	GO:0005173	0.017
715	2658	GO:0051010	0.017
716	573	GO:0005913	0.017
717	3188	GO:0072104	0.017
718	603	GO:0006261	0.017
719	65	GO:0000404	0.017
720	2382	GO:0046579	0.017
721	3194	GO:0072136	0.017
722	1925	GO:0035988	0.017
723	2521	GO:0048598	0.017
724	1453	GO:0030893	0.017
725	1785	GO:0034332	0.017
726	3462	hsa03420	0.017
727	2462	GO:0048096	0.017
728	2123	GO:0043409	0.017
729	3085	GO:0070857	0.017
730	1748	GO:0033627	0.017
731	14	GO:0000076	0.017
732	3250	GO:0090074	0.017
733	2573	GO:0048878	0.017
734	727	GO:0007144	0.017
735	2940	GO:0060740	0.017
736	2190	GO:0044346	0.017
737	3407	GO:2001220	0.017
738	3251	GO:0090096	0.017
739	1676	GO:0032862	0.017
740	3175	GO:0072015	0.017
741	2591	GO:0050678	0.017
742	903	GO:0009611	0.017
743	2857	GO:0060364	0.017
744	2543	GO:0048711	0.017
745	3350	GO:2000481	0.017
746	1481	GO:0031102	0.017
747	838	GO:0008274	0.017
748	1746	GO:0033619	0.017
749	997	GO:0010757	0.017
750	1739	GO:0033591	0.017
751	1781	GO:0034244	0.017
752	2823	GO:0060128	0.017
753	2992	GO:0061178	0.017
754	3005	GO:0065004	0.017
755	2949	GO:0060762	0.017
756	1735	GO:0033561	0.017
757	3270	GO:0090307	0.017
758	906	GO:0009629	0.017
759	436	GO:0004725	0.017
760	560	GO:0005828	0.017
761	619	GO:0006297	0.017
762	608	GO:0006271	0.017
763	2492	GO:0048341	0.017
764	1827	GO:0035020	0.017
765	1325	GO:0022601	0.017
766	533	GO:0005662	0.017
767	2069	GO:0043120	0.017
768	15	GO:0000077	0.016
769	2985	GO:0061146	0.016
770	2563	GO:0048845	0.016
771	3284	GO:0097021	0.016
772	1672	GO:0032813	0.016
773	151	GO:0001570	0.016
774	3051	GO:0070424	0.016
775	1767	GO:0034063	0.016
776	17	GO:0000080	0.016
777	1632	GO:0032463	0.016
778	2546	GO:0048714	0.016
779	2705	GO:0051298	0.016
780	2931	GO:0060694	0.016
781	1559	GO:0031915	0.016
782	2291	GO:0045713	0.016
783	3072	GO:0070668	0.016
784	458	GO:0004955	0.016
785	303	GO:0002763	0.016
786	1131	GO:0016477	0.016
787	1545	GO:0031643	0.016
788	2285	GO:0045669	0.016
789	179	GO:0001755	0.016
790	916	GO:0009880	0.016
791	3220	GO:0072307	0.016
792	352	GO:0003382	0.016
793	2953	GO:0060770	0.016
794	2132	GO:0043497	0.016
795	982	GO:0010664	0.016
796	145	GO:0001550	0.016
797	85	GO:0000778	0.016
798	2201	GO:0045023	0.016
799	2154	GO:0043564	0.016
800	3178	GO:0072040	0.016
801	698	GO:0007051	0.016
802	535	GO:0005664	0.016
803	122	GO:0001047	0.016
804	331	GO:0003197	0.016
805	2349	GO:0045945	0.016
806	3446	hsa03440	0.016
807	2913	GO:0060598	0.016
808	2700	GO:0051280	0.016
809	2536	GO:0048678	0.016
810	351	GO:0003338	0.016
811	999	GO:0010763	0.016
812	641	GO:0006359	0.016
813	2647	GO:0050873	0.016
814	643	GO:0006461	0.016
815	3460	hsa05223	0.016
816	1580	GO:0032095	0.016
817	1679	GO:0032869	0.016
818	3318	GO:2000065	0.016
819	1392	GO:0030336	0.016
820	1612	GO:0032348	0.016
821	2464	GO:0048103	0.016
822	3176	GO:0072017	0.016
823	1812	GO:0034676	0.016
824	1216	GO:0019104	0.016
825	1164	GO:0016888	0.016
826	13	GO:0000075	0.016
827	3172	GO:0071954	0.016
828	1908	GO:0035712	0.016
829	1508	GO:0031343	0.016
830	1907	GO:0035709	0.016
831	1460	GO:0030953	0.016
832	103	GO:0000900	0.016
833	264	GO:0002215	0.016
834	3302	GO:1900281	0.016
835	1906	GO:0035708	0.016
836	3007	GO:0070022	0.016
837	3117	GO:0071353	0.016
838	1322	GO:0022407	0.016
839	2489	GO:0048332	0.016
840	1295	GO:0021797	0.016
841	3138	GO:0071535	0.016
842	1368	GO:0030263	0.016
843	2639	GO:0050840	0.016
844	2470	GO:0048185	0.016
845	2417	GO:0046854	0.016
846	1111	GO:0016303	0.016
847	2402	GO:0046677	0.016
848	3001	GO:0061351	0.016
849	2294	GO:0045717	0.016
850	1330	GO:0023014	0.016
851	3161	GO:0071864	0.016
852	479	GO:0005113	0.016
853	1886	GO:0035518	0.016
854	2692	GO:0051247	0.016
855	2679	GO:0051149	0.016
856	2506	GO:0048538	0.016
857	1692	GO:0032943	0.016
858	2841	GO:0060253	0.016
859	2715	GO:0051384	0.016
860	888	GO:0009214	0.016
861	390	GO:0004113	0.016
862	201	GO:0001838	0.016
863	1605	GO:0032302	0.016
864	1158	GO:0016805	0.016
865	67	GO:0000406	0.016
866	539	GO:0005694	0.016
867	329	GO:0003183	0.016
868	1589	GO:0032181	0.016
869	581	GO:0005958	0.016
870	1120	GO:0016337	0.016
871	3217	GO:0072289	0.016
872	2859	GO:0060374	0.016
873	3461	hsa04330	0.016
874	2338	GO:0045892	0.016
875	988	GO:0010719	0.016
876	1196	GO:0018149	0.016
877	222	GO:0001938	0.016
878	1237	GO:0019827	0.016
879	1871	GO:0035371	0.016
880	1639	GO:0032508	0.016
881	2404	GO:0046683	0.016
882	1877	GO:0035408	0.016
883	1874	GO:0035403	0.016
884	867	GO:0008595	0.016
885	2649	GO:0050900	0.016
886	3003	GO:0061383	0.016
887	1999	GO:0042487	0.016
888	3185	GO:0072079	0.016
889	977	GO:0010628	0.016
890	1929	GO:0036023	0.016
891	1378	GO:0030296	0.016
892	2890	GO:0060512	0.016
893	1081	GO:0015327	0.016
894	2735	GO:0051493	0.016
895	1993	GO:0042415	0.016
896	2277	GO:0045656	0.016
897	2290	GO:0045687	0.016
898	1751	GO:0033630	0.016
899	2846	GO:0060290	0.016
900	3392	GO:2000811	0.016
901	732	GO:0007160	0.016
902	2996	GO:0061302	0.016
903	2765	GO:0051795	0.016
904	3431	hsa03030	0.016
905	2223	GO:0045175	0.016
906	1260	GO:0019966	0.016
907	2075	GO:0043137	0.016
908	2116	GO:0043392	0.015
909	1119	GO:0016331	0.015
910	1712	GO:0033145	0.015
911	2142	GO:0043536	0.015
912	3090	GO:0070935	0.015
913	2344	GO:0045918	0.015
914	2149	GO:0043550	0.015
915	1417	GO:0030546	0.015
916	99	GO:0000805	0.015
917	2772	GO:0051893	0.015
918	1642	GO:0032526	0.015
919	1442	GO:0030858	0.015
920	100	GO:0000806	0.015
921	2145	GO:0043542	0.015
922	1547	GO:0031648	0.015
923	1664	GO:0032800	0.015
924	1003	GO:0010800	0.015
925	1970	GO:0042129	0.015
926	818	GO:0008089	0.015
927	766	GO:0007346	0.015
928	3165	GO:0071895	0.015
929	1509	GO:0031345	0.015
930	1355	GO:0030198	0.015
931	3162	GO:0071866	0.015
932	2714	GO:0051382	0.015
933	647	GO:0006516	0.015
934	4	GO:0000019	0.015
935	1059	GO:0014732	0.015
936	2222	GO:0045171	0.015
937	1270	GO:0021533	0.015
938	808	GO:0008037	0.015
939	1198	GO:0018205	0.015
940	2351	GO:0045955	0.015
941	2139	GO:0043524	0.015
942	1819	GO:0034750	0.015
943	978	GO:0010629	0.015
944	262	GO:0002193	0.015
945	1128	GO:0016446	0.015
946	1294	GO:0021796	0.015
947	1361	GO:0030223	0.015
948	502	GO:0005488	0.015
949	95	GO:0000796	0.015
950	3259	GO:0090193	0.015
951	2959	GO:0060825	0.015
952	2848	GO:0060302	0.015
953	3335	GO:2000313	0.015
954	340	GO:0003273	0.015
955	2236	GO:0045295	0.015
956	1787	GO:0034351	0.015
957	510	GO:0005524	0.015
958	166	GO:0001673	0.015
959	2394	GO:0046641	0.015
960	739	GO:0007173	0.015
961	747	GO:0007219	0.015
962	1346	GO:0030168	0.015
963	1662	GO:0032794	0.015
964	1247	GO:0019900	0.015
965	2469	GO:0048168	0.015
966	2570	GO:0048870	0.015
967	86	GO:0000779	0.015
968	358	GO:0003678	0.015
969	1398	GO:0030422	0.015
970	2581	GO:0050431	0.015
971	1996	GO:0042475	0.015
972	2016	GO:0042583	0.015
973	610	GO:0006273	0.015
974	20	GO:0000084	0.015
975	887	GO:0009186	0.015
976	2912	GO:0060596	0.015
977	1385	GO:0030324	0.015
978	434	GO:0004721	0.015
979	160	GO:0001656	0.015
980	3163	GO:0071889	0.015
981	1769	GO:0034097	0.015
982	3213	GO:0072221	0.015
983	2874	GO:0060438	0.015
984	2006	GO:0042524	0.015
985	310	GO:0002903	0.015
986	2950	GO:0060766	0.015
987	3428	hsa05220	0.015
988	2225	GO:0045178	0.015
989	1053	GO:0014040	0.015
990	2535	GO:0048664	0.015
991	299	GO:0002740	0.015
992	1979	GO:0042221	0.015
993	3204	GO:0072182	0.015
994	3315	GO:2000060	0.015
995	1745	GO:0033601	0.015
996	1242	GO:0019865	0.015
997	68	GO:0000444	0.015
998	1731	GO:0033504	0.015
999	1215	GO:0019103	0.015
1000	2963	GO:0060900	0.015

## Sheet: Dateset5 mRMR Table
Order	Feature	Name	Score
1	421	GO:0004677	0.045
2	1475	GO:0031081	0.029
3	2864	GO:0060394	0.025
4	2663	GO:0051041	0.021
5	1887	GO:0035520	0.018
6	2777	GO:0051901	0.018
7	2550	GO:0048733	0.017
8	555	GO:0005813	0.019
9	1404	GO:0030500	0.016
10	1500	GO:0031301	0.016
11	2423	GO:0046903	0.015
12	106	GO:0000915	0.016
13	2744	GO:0051571	0.016
14	257	GO:0002102	0.016
15	2212	GO:0045103	0.016
16	586	GO:0006044	0.014
17	2490	GO:0048333	0.015
18	101	GO:0000808	0.015
19	2288	GO:0045682	0.014
20	472	GO:0005072	0.014
21	839	GO:0008278	0.014
22	398	GO:0004415	0.014
23	888	GO:0009214	0.013
24	2220	GO:0045143	0.013
25	59	GO:0000380	0.013
26	2244	GO:0045404	0.013
27	1479	GO:0031098	0.013
28	696	GO:0007049	0.013
29	2392	GO:0046632	0.012
30	582	GO:0005971	0.012
31	1713	GO:0033148	0.012
32	1335	GO:0030056	0.012
33	429	GO:0004712	0.012
34	390	GO:0004113	0.012
35	824	GO:0008147	0.012
36	974	GO:0010616	0.012
37	2809	GO:0060044	0.012
38	606	GO:0006268	0.012
39	2796	GO:0055096	0.012
40	1884	GO:0035501	0.012
41	1786	GO:0034333	0.012
42	2703	GO:0051292	0.012
43	1972	GO:0042159	0.012
44	2363	GO:0046092	0.012
45	3375	GO:2000707	0.012
46	108	GO:0000922	0.012
47	832	GO:0008239	0.011
48	2651	GO:0050902	0.011
49	702	GO:0007062	0.011
50	3262	GO:0090219	0.011
51	2881	GO:0060449	0.011
52	720	GO:0007108	0.011
53	1158	GO:0016805	0.011
54	2811	GO:0060051	0.011
55	2229	GO:0045197	0.011
56	3099	GO:0071168	0.011
57	2573	GO:0048878	0.011
58	1717	GO:0033153	0.011
59	3374	GO:2000685	0.011
60	1081	GO:0015327	0.011
61	3038	GO:0070314	0.011
62	1750	GO:0033629	0.011
63	2270	GO:0045624	0.011
64	2050	GO:0043015	0.01
65	2934	GO:0060710	0.01
66	1944	GO:0040001	0.01
67	507	GO:0005520	0.01
68	556	GO:0005815	0.01
69	2359	GO:0046060	0.01
70	1218	GO:0019208	0.01
71	663	GO:0006910	0.01
72	382	GO:0003918	0.01
73	2091	GO:0043220	0.01
74	3039	GO:0070317	0.01
75	1847	GO:0035173	0.01
76	2822	GO:0060123	0.01
77	1730	GO:0033484	0.01
78	704	GO:0007064	0.01
79	349	GO:0003334	0.01
80	2710	GO:0051310	0.01
81	2010	GO:0042552	0.01
82	1789	GO:0034389	0.01
83	1753	GO:0033673	0.01
84	3256	GO:0090166	0.01
85	1304	GO:0021889	0.01
86	1309	GO:0021942	0.01
87	508	GO:0005521	0.01
88	2798	GO:0055100	0.01
89	2455	GO:0048024	0.01
90	1741	GO:0033594	0.01
91	623	GO:0006303	0.01
92	2805	GO:0060020	0.01
93	2089	GO:0043208	0.01
94	2754	GO:0051649	0.01
95	1319	GO:0022027	0.009
96	1883	GO:0035500	0.009
97	1742	GO:0033596	0.009
98	1632	GO:0032463	0.009
99	1758	GO:0033690	0.009
100	48	GO:0000236	0.009
101	1650	GO:0032680	0.009
102	716	GO:0007095	0.009
103	1644	GO:0032548	0.009
104	3398	GO:2001027	0.009
105	2840	GO:0060252	0.009
106	1723	GO:0033205	0.009
107	2170	GO:0043697	0.009
108	1157	GO:0016799	0.009
109	69	GO:0000578	0.009
110	2117	GO:0043393	0.009
111	1164	GO:0016888	0.009
112	1967	GO:0042116	0.009
113	712	GO:0007091	0.009
114	3195	GO:0072138	0.009
115	2446	GO:0047747	0.009
116	1126	GO:0016363	0.009
117	1002	GO:0010771	0.009
118	3459	hsa03450	0.009
119	2913	GO:0060598	0.009
120	1514	GO:0031427	0.009
121	134	GO:0001300	0.009
122	1924	GO:0035987	0.009
123	2335	GO:0045875	0.009
124	1551	GO:0031666	0.009
125	2347	GO:0045943	0.009
126	1152	GO:0016628	0.009
127	103	GO:0000900	0.009
128	159	GO:0001655	0.009
129	613	GO:0006282	0.009
130	1179	GO:0017123	0.009
131	2691	GO:0051233	0.009
132	2748	GO:0051580	0.009
133	1011	GO:0010837	0.009
134	2019	GO:0042602	0.009
135	1200	GO:0018243	0.009
136	825	GO:0008156	0.009
137	1035	GO:0010972	0.009
138	563	GO:0005873	0.009
139	743	GO:0007181	0.009
140	320	GO:0003131	0.009
141	1954	GO:0040038	0.009
142	3409	GO:2001241	0.009
143	3140	GO:0071559	0.009
144	1108	GO:0016231	0.008
145	1517	GO:0031436	0.008
146	2856	GO:0060363	0.009
147	3353	GO:2000504	0.008
148	1340	GO:0030127	0.008
149	82	GO:0000775	0.008
150	1732	GO:0033549	0.008
151	1069	GO:0014912	0.008
152	2527	GO:0048638	0.008
153	1217	GO:0019206	0.008
154	2850	GO:0060317	0.008
155	1675	GO:0032859	0.008
156	3054	GO:0070463	0.008
157	1921	GO:0035978	0.008
158	897	GO:0009401	0.008
159	267	GO:0002244	0.008
160	436	GO:0004725	0.008
161	3383	GO:2000773	0.008
162	647	GO:0006516	0.008
163	8	GO:0000064	0.008
164	947	GO:0010389	0.008
165	2225	GO:0045178	0.008
166	1816	GO:0034722	0.008
167	2226	GO:0045179	0.008
168	2411	GO:0046826	0.008
169	2518	GO:0048592	0.008
170	3323	GO:2000121	0.008
171	87	GO:0000780	0.008
172	3399	GO:2001033	0.008
173	1422	GO:0030617	0.008
174	391	GO:0004137	0.008
175	2360	GO:0046078	0.008
176	1839	GO:0035108	0.008
177	2980	GO:0061044	0.008
178	882	GO:0009056	0.008
179	22	GO:0000087	0.008
180	812	GO:0008049	0.008
181	2137	GO:0043517	0.008
182	1033	GO:0010952	0.008
183	1677	GO:0032863	0.008
184	1508	GO:0031343	0.008
185	2223	GO:0045175	0.008
186	601	GO:0006259	0.008
187	2196	GO:0044464	0.008
188	1199	GO:0018242	0.008
189	863	GO:0008574	0.008
190	1466	GO:0031052	0.008
191	935	GO:0010159	0.008
192	2439	GO:0047293	0.008
193	2067	GO:0043112	0.008
194	892	GO:0009294	0.008
195	2764	GO:0051782	0.008
196	2016	GO:0042583	0.008
197	2101	GO:0043254	0.008
198	502	GO:0005488	0.008
199	2814	GO:0060059	0.008
200	3081	GO:0070816	0.008
201	3151	GO:0071777	0.008
202	2588	GO:0050656	0.008
203	1851	GO:0035234	0.008
204	1097	GO:0015929	0.008
205	2658	GO:0051010	0.008
206	3226	GO:0072563	0.008
207	722	GO:0007126	0.008
208	1374	GO:0030289	0.008
209	1284	GO:0021695	0.008
210	1598	GO:0032275	0.008
211	2762	GO:0051754	0.008
212	3192	GO:0072133	0.008
213	276	GO:0002430	0.008
214	1394	GO:0030362	0.007
215	886	GO:0009165	0.008
216	154	GO:0001605	0.007
217	365	GO:0003691	0.007
218	237	GO:0002009	0.007
219	1503	GO:0031323	0.007
220	976	GO:0010626	0.007
221	3075	GO:0070700	0.007
222	2694	GO:0051256	0.008
223	3105	GO:0071258	0.007
224	2034	GO:0042801	0.007
225	2126	GO:0043426	0.007
226	1215	GO:0019103	0.007
227	2426	GO:0046921	0.007
228	1524	GO:0031507	0.007
229	2417	GO:0046854	0.007
230	2162	GO:0043596	0.007
231	2237	GO:0045296	0.007
232	1897	GO:0035617	0.007
233	3312	GO:2000042	0.007
234	1260	GO:0019966	0.007
235	975	GO:0010625	0.007
236	885	GO:0009157	0.007
237	2294	GO:0045717	0.007
238	2038	GO:0042941	0.007
239	804	GO:0008013	0.007
240	3421	hsa03410	0.007
241	1822	GO:0034773	0.007
242	2197	GO:0044539	0.007
243	1886	GO:0035518	0.007
244	2062	GO:0043089	0.007
245	146	GO:0001556	0.007
246	3367	GO:2000648	0.007
247	255	GO:0002083	0.007
248	3143	GO:0071593	0.007
249	1694	GO:0032967	0.007
250	1802	GO:0034509	0.007
251	2020	GO:0042634	0.007
252	2727	GO:0051444	0.007
253	3250	GO:0090074	0.007
254	3093	GO:0071065	0.007
255	47	GO:0000228	0.007
256	2567	GO:0048859	0.007
257	445	GO:0004843	0.007
258	2648	GO:0050880	0.007
259	836	GO:0008265	0.007
260	946	GO:0010333	0.007
261	1796	GO:0034451	0.007
262	387	GO:0004003	0.007
263	2017	GO:0042585	0.007
264	1588	GO:0032154	0.007
265	1932	GO:0036071	0.007
266	299	GO:0002740	0.007
267	3364	GO:2000617	0.007
268	2040	GO:0042954	0.007
269	373	GO:0003837	0.007
270	395	GO:0004342	0.007
271	3289	GO:0097149	0.007
272	1880	GO:0035491	0.007
273	97	GO:0000800	0.007
274	2868	GO:0060412	0.007
275	1138	GO:0016538	0.007
276	2033	GO:0042799	0.007
277	3243	GO:0090003	0.007
278	3	GO:0000018	0.007
279	2286	GO:0045670	0.007
280	1867	GO:0035335	0.007
281	490	GO:0005176	0.007
282	2112	GO:0043368	0.007
283	3400	GO:2001038	0.007
284	598	GO:0006231	0.007
285	2639	GO:0050840	0.007
286	2146	GO:0043545	0.007
287	3163	GO:0071889	0.007
288	1725	GO:0033262	0.007
289	2542	GO:0048709	0.007
290	858	GO:0008424	0.007
291	83	GO:0000776	0.007
292	1812	GO:0034676	0.007
293	1021	GO:0010894	0.007
294	1768	GO:0034088	0.007
295	528	GO:0005639	0.007
296	501	GO:0005452	0.007
297	2421	GO:0046884	0.007
298	709	GO:0007088	0.007
299	3193	GO:0072134	0.007
300	2395	GO:0046651	0.007
301	46	GO:0000224	0.007
302	638	GO:0006353	0.007
303	2906	GO:0060565	0.007
304	1766	GO:0034056	0.007
305	384	GO:0003952	0.007
306	1871	GO:0035371	0.007
307	1746	GO:0033619	0.007
308	2674	GO:0051103	0.007
309	1619	GO:0032374	0.007
310	396	GO:0004382	0.007
311	890	GO:0009263	0.007
312	1866	GO:0035330	0.007
313	496	GO:0005260	0.007
314	2699	GO:0051276	0.007
315	2927	GO:0060686	0.007
316	1767	GO:0034063	0.007
317	1074	GO:0015149	0.007
318	2997	GO:0061304	0.007
319	1534	GO:0031572	0.007
320	2213	GO:0045109	0.007
321	2620	GO:0050773	0.006
322	1433	GO:0030835	0.006
323	1028	GO:0010936	0.006
324	719	GO:0007100	0.006
325	3022	GO:0070207	0.006
326	1706	GO:0033128	0.006
327	1489	GO:0031214	0.006
328	1333	GO:0030030	0.006
329	592	GO:0006121	0.006
330	1050	GO:0014013	0.006
331	444	GO:0004799	0.006
332	1697	GO:0032993	0.006
333	1683	GO:0032876	0.006
334	652	GO:0006612	0.006
335	3025	GO:0070224	0.006
336	838	GO:0008274	0.006
337	1859	GO:0035284	0.006
338	1664	GO:0032800	0.006
339	2098	GO:0043240	0.006
340	700	GO:0007057	0.006
341	3239	GO:0080130	0.006
342	1827	GO:0035020	0.006
343	2517	GO:0048589	0.006
344	469	GO:0005055	0.006
345	2195	GO:0044430	0.006
346	1568	GO:0031988	0.006
347	2191	GO:0044354	0.006
348	1663	GO:0032799	0.006
349	96	GO:0000797	0.006
350	1522	GO:0031492	0.006
351	3086	GO:0070887	0.006
352	1262	GO:0020028	0.006
353	111	GO:0000942	0.006
354	3303	GO:1900625	0.006
355	2625	GO:0050779	0.006
356	683	GO:0006975	0.006
357	590	GO:0006106	0.006
358	1109	GO:0016242	0.006
359	3055	GO:0070483	0.006
360	2499	GO:0048478	0.006
361	2487	GO:0048318	0.006
362	831	GO:0008238	0.006
363	1046	GO:0014002	0.006
364	2332	GO:0045862	0.006
365	1432	GO:0030833	0.006
366	3027	GO:0070253	0.006
367	71	GO:0000710	0.006
368	326	GO:0003167	0.006
369	1403	GO:0030496	0.006
370	1836	GO:0035065	0.006
371	412	GO:0004609	0.006
372	1213	GO:0019088	0.006
373	1242	GO:0019865	0.006
374	2747	GO:0051575	0.006
375	2712	GO:0051329	0.006
376	1614	GO:0032354	0.006
377	3425	hsa04110	0.006
378	2420	GO:0046879	0.006
379	145	GO:0001550	0.006
380	3073	GO:0070683	0.006
381	1196	GO:0018149	0.006
382	1878	GO:0035428	0.006
383	409	GO:0004534	0.006
384	3111	GO:0071305	0.006
385	1494	GO:0031262	0.006
386	2497	GO:0048471	0.006
387	1671	GO:0032812	0.006
388	1666	GO:0032802	0.006
389	2114	GO:0043372	0.006
390	439	GO:0004748	0.006
391	1738	GO:0033588	0.006
392	1094	GO:0015891	0.006
393	2266	GO:0045605	0.006
394	495	GO:0005224	0.006
395	1251	GO:0019908	0.006
396	3218	GO:0072300	0.006
397	1965	GO:0042108	0.006
398	506	GO:0005518	0.006
399	1937	GO:0038062	0.006
400	3365	GO:2000620	0.006
401	1424	GO:0030660	0.006
402	532	GO:0005658	0.006
403	1052	GO:0014037	0.006
404	1010	GO:0010835	0.006
405	3129	GO:0071449	0.006
406	2060	GO:0043085	0.006
407	1938	GO:0038063	0.006
408	2967	GO:0060931	0.006
409	3113	GO:0071329	0.006
410	2772	GO:0051893	0.006
411	2326	GO:0045839	0.006
412	1220	GO:0019212	0.006
413	1603	GO:0032299	0.006
414	2820	GO:0060112	0.006
415	2183	GO:0044302	0.006
416	2548	GO:0048729	0.006
417	1402	GO:0030492	0.006
418	280	GO:0002462	0.006
419	3031	GO:0070273	0.006
420	828	GO:0008201	0.006
421	3362	GO:2000612	0.006
422	1850	GO:0035196	0.006
423	1525	GO:0031508	0.006
424	3397	GO:2001022	0.006
425	2330	GO:0045859	0.006
426	3348	GO:2000467	0.006
427	1520	GO:0031464	0.006
428	12	GO:0000073	0.006
429	986	GO:0010716	0.006
430	1704	GO:0033088	0.006
431	394	GO:0004333	0.006
432	5	GO:0000022	0.006
433	1737	GO:0033578	0.006
434	2981	GO:0061045	0.006
435	1498	GO:0031297	0.006
436	1787	GO:0034351	0.006
437	2468	GO:0048160	0.006
438	1821	GO:0034770	0.006
439	835	GO:0008262	0.006
440	1090	GO:0015825	0.006
441	1540	GO:0031619	0.006
442	1256	GO:0019957	0.006
443	2529	GO:0048645	0.006
444	2073	GO:0043125	0.006
445	1044	GO:0012507	0.006
446	4	GO:0000019	0.006
447	859	GO:0008432	0.006
448	3077	GO:0070734	0.006
449	3137	GO:0071514	0.006
450	2633	GO:0050819	0.006
451	2996	GO:0061302	0.006
452	3246	GO:0090007	0.006
453	552	GO:0005795	0.006
454	3062	GO:0070512	0.006
455	1183	GO:0017159	0.005
456	2083	GO:0043175	0.005
457	3259	GO:0090193	0.005
458	691	GO:0007018	0.006
459	519	GO:0005586	0.006
460	3311	GO:2000036	0.006
461	1348	GO:0030174	0.006
462	2746	GO:0051574	0.005
463	1292	GO:0021785	0.005
464	206	GO:0001850	0.005
465	2224	GO:0045177	0.005
466	363	GO:0003689	0.005
467	2329	GO:0045843	0.005
468	2099	GO:0043243	0.005
469	2838	GO:0060236	0.005
470	3282	GO:0097001	0.005
471	1667	GO:0032803	0.005
472	517	GO:0005577	0.005
473	634	GO:0006344	0.005
474	16	GO:0000079	0.005
475	979	GO:0010633	0.005
476	906	GO:0009629	0.005
477	818	GO:0008089	0.005
478	1290	GO:0021773	0.005
479	846	GO:0008290	0.005
480	84	GO:0000777	0.005
481	1421	GO:0030616	0.005
482	457	GO:0004943	0.005
483	2709	GO:0051304	0.005
484	765	GO:0007292	0.005
485	1901	GO:0035634	0.005
486	2255	GO:0045502	0.005
487	1301	GO:0021873	0.005
488	929	GO:0010008	0.005
489	1898	GO:0035621	0.005
490	2011	GO:0042555	0.005
491	2733	GO:0051491	0.005
492	2959	GO:0060825	0.005
493	3020	GO:0070181	0.005
494	1958	GO:0042058	0.005
495	1519	GO:0031442	0.005
496	1481	GO:0031102	0.005
497	1344	GO:0030145	0.005
498	3264	GO:0090240	0.005
499	2905	GO:0060564	0.005
500	2978	GO:0061038	0.005
501	2603	GO:0050716	0.005
502	881	GO:0009048	0.005
503	2844	GO:0060266	0.005
504	1078	GO:0015194	0.005
505	2233	GO:0045239	0.005
506	2469	GO:0048168	0.005
507	1216	GO:0019104	0.005
508	491	GO:0005178	0.005
509	2231	GO:0045210	0.005
510	2916	GO:0060613	0.005
511	1393	GO:0030337	0.005
512	3024	GO:0070221	0.005
513	2554	GO:0048762	0.005
514	958	GO:0010485	0.005
515	452	GO:0004876	0.005
516	1231	GO:0019550	0.005
517	478	GO:0005112	0.005
518	102	GO:0000819	0.005
519	3017	GO:0070123	0.005
520	514	GO:0005542	0.005
521	1739	GO:0033591	0.005
522	1608	GO:0032319	0.005
523	1139	GO:0016570	0.005
524	2547	GO:0048715	0.005
525	1178	GO:0017119	0.005
526	850	GO:0008347	0.005
527	982	GO:0010664	0.005
528	1585	GO:0032142	0.005
529	764	GO:0007288	0.005
530	607	GO:0006270	0.005
531	2389	GO:0046626	0.005
532	2848	GO:0060302	0.005
533	3125	GO:0071398	0.005
534	1298	GO:0021858	0.005
535	1661	GO:0032786	0.005
536	1877	GO:0035408	0.005
537	1230	GO:0019483	0.005
538	658	GO:0006880	0.005
539	2966	GO:0060923	0.005
540	937	GO:0010212	0.005
541	1526	GO:0031523	0.005
542	1928	GO:0036003	0.005
543	1606	GO:0032311	0.005
544	504	GO:0005497	0.005
545	808	GO:0008037	0.005
546	2357	GO:0046038	0.005
547	3172	GO:0071954	0.005
548	1814	GO:0034699	0.005
549	23	GO:0000088	0.005
550	660	GO:0006895	0.005
551	1529	GO:0031529	0.005
552	1322	GO:0022407	0.005
553	692	GO:0007019	0.005
554	2088	GO:0043204	0.005
555	1977	GO:0042178	0.005
556	1740	GO:0033593	0.005
557	2316	GO:0045778	0.005
558	891	GO:0009267	0.005
559	533	GO:0005662	0.005
560	1872	GO:0035372	0.005
561	3201	GO:0072175	0.005
562	143	GO:0001546	0.005
563	1845	GO:0035140	0.005
564	2917	GO:0060623	0.005
565	451	GO:0004875	0.005
566	434	GO:0004721	0.005
567	3386	GO:2000779	0.005
568	456	GO:0004910	0.005
569	331	GO:0003197	0.005
570	629	GO:0006312	0.005
571	1413	GO:0030520	0.005
572	385	GO:0003953	0.005
573	1510	GO:0031346	0.005
574	371	GO:0003777	0.005
575	2310	GO:0045749	0.005
576	3178	GO:0072040	0.005
577	1842	GO:0035117	0.005
578	774	GO:0007402	0.005
579	2766	GO:0051797	0.005
580	2408	GO:0046785	0.005
581	1584	GO:0032139	0.005
582	3013	GO:0070086	0.005
583	3335	GO:2000313	0.005
584	27	GO:0000098	0.005
585	205	GO:0001848	0.005
586	3090	GO:0070935	0.005
587	2193	GO:0044425	0.005
588	463	GO:0005010	0.005
589	3056	GO:0070487	0.005
590	51	GO:0000285	0.005
591	11	GO:0000072	0.005
592	648	GO:0006532	0.005
593	3196	GO:0072144	0.005
594	2942	GO:0060743	0.005
595	879	GO:0008965	0.005
596	1453	GO:0030893	0.005
597	54	GO:0000296	0.005
598	1908	GO:0035712	0.005
599	2165	GO:0043618	0.005
600	2804	GO:0060017	0.005
601	2403	GO:0046680	0.005
602	240	GO:0002036	0.005
603	971	GO:0010593	0.005
604	1121	GO:0016338	0.005
605	558	GO:0005819	0.005
606	3019	GO:0070173	0.005
607	2641	GO:0050849	0.005
608	2598	GO:0050693	0.005
609	2471	GO:0048208	0.005
610	511	GO:0005534	0.005
611	1007	GO:0010825	0.005
612	19	GO:0000083	0.005
613	3345	GO:2000401	0.005
614	724	GO:0007129	0.005
615	2059	GO:0043069	0.004
616	68	GO:0000444	0.004
617	2985	GO:0061146	0.004
618	2704	GO:0051297	0.004
619	288	GO:0002544	0.004
620	605	GO:0006266	0.004
621	1282	GO:0021660	0.004
622	1581	GO:0032116	0.004
623	3281	GO:0090402	0.004
624	392	GO:0004146	0.004
625	1785	GO:0034332	0.004
626	1616	GO:0032357	0.004
627	3358	GO:2000587	0.004
628	2839	GO:0060242	0.004
629	1313	GO:0021978	0.004
630	1041	GO:0010997	0.004
631	1727	GO:0033276	0.004
632	1395	GO:0030379	0.004
633	3028	GO:0070254	0.004
634	1780	GO:0034237	0.004
635	2214	GO:0045120	0.004
636	2051	GO:0043017	0.004
637	1232	GO:0019551	0.004
638	1907	GO:0035709	0.004
639	1874	GO:0035403	0.004
640	1261	GO:0019985	0.004
641	2975	GO:0061035	0.004
642	813	GO:0008052	0.004
643	913	GO:0009756	0.004
644	852	GO:0008353	0.004
645	1595	GO:0032263	0.004
646	137	GO:0001503	0.004
647	1460	GO:0030953	0.004
648	1961	GO:0042063	0.004
649	211	GO:0001885	0.004
650	1156	GO:0016791	0.004
651	1324	GO:0022409	0.004
652	1140	GO:0016572	0.004
653	1342	GO:0030140	0.004
654	2782	GO:0051987	0.004
655	3377	GO:2000726	0.004
656	2222	GO:0045171	0.004
657	2493	GO:0048386	0.004
658	1379	GO:0030301	0.004
659	807	GO:0008024	0.004
660	264	GO:0002215	0.004
661	1427	GO:0030690	0.004
662	2328	GO:0045842	0.004
663	465	GO:0005020	0.004
664	837	GO:0008272	0.004
665	1916	GO:0035799	0.004
666	893	GO:0009299	0.004
667	1554	GO:0031838	0.004
668	560	GO:0005828	0.004
669	1117	GO:0016324	0.004
670	1098	GO:0015949	0.004
671	1922	GO:0035985	0.004
672	869	GO:0008608	0.004
673	2470	GO:0048185	0.004
674	1618	GO:0032370	0.004
675	1153	GO:0016653	0.004
676	2076	GO:0043140	0.004
677	2963	GO:0060900	0.004
678	227	GO:0001946	0.004
679	526	GO:0005635	0.004
680	3144	GO:0071598	0.004
681	1875	GO:0035404	0.004
682	657	GO:0006820	0.004
683	388	GO:0004069	0.004
684	1626	GO:0032422	0.004
685	1640	GO:0032509	0.004
686	1763	GO:0033993	0.004
687	513	GO:0005540	0.004
688	3109	GO:0071283	0.004
689	2563	GO:0048845	0.004
690	1089	GO:0015807	0.004
691	2821	GO:0060113	0.004
692	3302	GO:1900281	0.004
693	2447	GO:0047783	0.004
694	2757	GO:0051668	0.004
695	646	GO:0006470	0.004
696	1283	GO:0021666	0.004
697	93	GO:0000794	0.004
698	962	GO:0010524	0.004
699	933	GO:0010070	0.004
700	1325	GO:0022601	0.004
701	3071	GO:0070662	0.004
702	2786	GO:0052657	0.004
703	1378	GO:0030296	0.004
704	1054	GO:0014044	0.004
705	3284	GO:0097021	0.004
706	1077	GO:0015189	0.004
707	44	GO:0000212	0.004
708	1979	GO:0042221	0.004
709	1923	GO:0035986	0.004
710	726	GO:0007141	0.004
711	1441	GO:0030857	0.004
712	2957	GO:0060804	0.004
713	2234	GO:0045244	0.004
714	1906	GO:0035708	0.004
715	3041	GO:0070326	0.004
716	612	GO:0006281	0.004
717	399	GO:0004450	0.004
718	298	GO:0002674	0.004
719	3167	GO:0071901	0.004
720	2063	GO:0043097	0.004
721	3363	GO:2000615	0.004
722	2802	GO:0060005	0.004
723	341	GO:0003279	0.004
724	3331	GO:2000276	0.004
725	2298	GO:0045726	0.004
726	34	GO:0000133	0.004
727	2781	GO:0051984	0.004
728	1434	GO:0030836	0.004
729	1641	GO:0032525	0.004
730	1182	GO:0017148	0.004
731	417	GO:0004645	0.004
732	3061	GO:0070507	0.004
733	682	GO:0006974	0.004
734	3156	GO:0071813	0.004
735	191	GO:0001787	0.004
736	3341	GO:2000373	0.004
737	2415	GO:0046848	0.004
738	627	GO:0006310	0.004
739	1088	GO:0015755	0.004
740	866	GO:0008588	0.004
741	789	GO:0007501	0.004
742	1170	GO:0017048	0.004
743	1201	GO:0018277	0.004
744	3051	GO:0070424	0.004
745	3321	GO:2000108	0.004
746	957	GO:0010484	0.004
747	2697	GO:0051271	0.004
748	2364	GO:0046100	0.004
749	1161	GO:0016851	0.004
750	2492	GO:0048341	0.004
751	503	GO:0005496	0.004
752	259	GO:0002114	0.004
753	698	GO:0007051	0.004
754	3385	GO:2000778	0.004
755	423	GO:0004697	0.004
756	381	GO:0003916	0.004
757	3402	GO:2001076	0.004
758	2413	GO:0046831	0.004
759	1934	GO:0038007	0.004
760	2293	GO:0045716	0.004
761	208	GO:0001869	0.004
762	2531	GO:0048660	0.004
763	2342	GO:0045910	0.004
764	1226	GO:0019377	0.004
765	1459	GO:0030951	0.004
766	3319	GO:2000098	0.004
767	3115	GO:0071335	0.004
768	1239	GO:0019836	0.004
769	1111	GO:0016303	0.004
770	2043	GO:0042992	0.004
771	659	GO:0006888	0.004
772	76	GO:0000723	0.004
773	662	GO:0006909	0.004
774	587	GO:0006097	0.004
775	2503	GO:0048523	0.004
776	1370	GO:0030277	0.004
777	2745	GO:0051573	0.004
778	2863	GO:0060393	0.004
779	3389	GO:2000793	0.003
780	1100	GO:0015979	0.003
781	2461	GO:0048070	0.003
782	1995	GO:0042471	0.003
783	1623	GO:0032403	0.003
784	1634	GO:0032493	0.003
785	584	GO:0005984	0.003
786	2801	GO:0060004	0.003
787	1674	GO:0032855	0.003
788	1848	GO:0035174	0.003
789	258	GO:0002113	0.003
790	1001	GO:0010767	0.003
791	2765	GO:0051795	0.003
792	2377	GO:0046474	0.003
793	2831	GO:0060206	0.003
794	631	GO:0006335	0.003
795	3059	GO:0070493	0.003
796	2284	GO:0045668	0.003
797	3395	GO:2001014	0.003
798	1627	GO:0032425	0.003
799	1577	GO:0032077	0.003
800	2358	GO:0046040	0.003
801	419	GO:0004674	0.003
802	768	GO:0007356	0.003
803	1452	GO:0030892	0.003
804	2239	GO:0045323	0.003
805	1219	GO:0019211	0.003
806	2158	GO:0043570	0.003
807	1064	GO:0014829	0.003
808	383	GO:0003940	0.003
809	377	GO:0003887	0.003
810	787	GO:0007497	0.003
811	31	GO:0000124	0.003
812	1012	GO:0010862	0.003
813	1491	GO:0031252	0.003
814	1101	GO:0015995	0.003
815	3327	GO:2000145	0.003
816	3390	GO:2000802	0.003
817	3326	GO:2000144	0.003
818	1253	GO:0019934	0.003
819	1905	GO:0035694	0.003
820	2707	GO:0051301	0.003
821	1855	GO:0035261	0.003
822	1852	GO:0035253	0.003
823	72	GO:0000712	0.003
824	3305	GO:2000005	0.003
825	3092	GO:0071062	0.003
826	2597	GO:0050692	0.003
827	1601	GO:0032290	0.003
828	497	GO:0005289	0.003
829	641	GO:0006359	0.003
830	2479	GO:0048260	0.003
831	3135	GO:0071480	0.003
832	3048	GO:0070411	0.003
833	1329	GO:0022891	0.003
834	2437	GO:0047035	0.003
835	723	GO:0007127	0.003
836	1543	GO:0031641	0.003
837	2362	GO:0046083	0.003
838	1688	GO:0032916	0.003
839	2861	GO:0060390	0.003
840	2714	GO:0051382	0.003
841	2021	GO:0042637	0.003
842	3212	GO:0072207	0.003
843	1206	GO:0019012	0.003
844	1162	GO:0016854	0.003
845	1586	GO:0032143	0.003
846	1365	GO:0030247	0.003
847	3387	GO:2000780	0.003
848	389	GO:0004074	0.003
849	2384	GO:0046601	0.003
850	537	GO:0005675	0.003
851	732	GO:0007160	0.003
852	1470	GO:0031060	0.003
853	1744	GO:0033600	0.003
854	884	GO:0009128	0.003
855	2858	GO:0060373	0.003
856	2456	GO:0048039	0.003
857	3306	GO:2000007	0.003
858	2167	GO:0043626	0.003
859	2930	GO:0060693	0.003
860	1311	GO:0021955	0.003
861	343	GO:0003289	0.003
862	1797	GO:0034464	0.003
863	1166	GO:0016922	0.003
864	1807	GO:0034616	0.003
865	2077	GO:0043142	0.003
866	3214	GO:0072233	0.003
867	1133	GO:0016486	0.003
868	441	GO:0004776	0.003
869	2404	GO:0046683	0.003
870	3224	GO:0072384	0.003
871	2575	GO:0050115	0.003
872	1061	GO:0014741	0.003
873	2383	GO:0046600	0.003
874	1376	GO:0030294	0.003
875	2629	GO:0050798	0.003
876	3467	hsa00770	0.003
877	1026	GO:0010922	0.003
878	2761	GO:0051726	0.003
879	2587	GO:0050655	0.003
880	2431	GO:0046958	0.003
881	1042	GO:0012501	0.003
882	289	GO:0002548	0.003
883	908	GO:0009649	0.003
884	2352	GO:0045964	0.003
885	2690	GO:0051225	0.003
886	3297	GO:1900163	0.003
887	1560	GO:0031929	0.003
888	3325	GO:2000137	0.003
889	73	GO:0000718	0.003
890	3308	GO:2000010	0.003
891	2333	GO:0045869	0.003
892	639	GO:0006354	0.003
893	340	GO:0003273	0.003
894	1604	GO:0032301	0.003
895	2586	GO:0050652	0.003
896	2857	GO:0060364	0.003
897	715	GO:0007094	0.003
898	2144	GO:0043539	0.003
899	677	GO:0006956	0.003
900	2545	GO:0048713	0.003
901	2107	GO:0043297	0.003
902	139	GO:0001537	0.003
903	2053	GO:0043035	0.003
904	3463	hsa04114	0.003
905	1435	GO:0030838	0.003
906	2537	GO:0048685	0.003
907	3094	GO:0071107	0.003
908	3015	GO:0070097	0.003
909	1834	GO:0035051	0.003
910	10	GO:0000070	0.003
911	52	GO:0000287	0.003
912	2154	GO:0043564	0.003
913	155	GO:0001635	0.003
914	1991	GO:0042347	0.003
915	2841	GO:0060253	0.003
916	109	GO:0000939	0.003
917	2647	GO:0050873	0.003
918	29	GO:0000117	0.003
919	1169	GO:0017018	0.003
920	2740	GO:0051534	0.003
921	3088	GO:0070892	0.003
922	252	GO:0002072	0.003
923	857	GO:0008420	0.003
924	603	GO:0006261	0.003
925	2987	GO:0061151	0.003
926	70	GO:0000701	0.003
927	9	GO:0000066	0.003
928	1004	GO:0010801	0.003
929	594	GO:0006178	0.003
930	535	GO:0005664	0.003
931	1237	GO:0019827	0.003
932	493	GO:0005198	0.003
933	2209	GO:0045086	0.003
934	3380	GO:2000753	0.003
935	1347	GO:0030169	0.002
936	2525	GO:0048632	0.002
937	98	GO:0000801	0.002
938	1499	GO:0031298	0.002
939	687	GO:0006991	0.002
940	2566	GO:0048857	0.002
941	1925	GO:0035988	0.002
942	705	GO:0007067	0.002
943	3107	GO:0071267	0.002
944	1559	GO:0031915	0.002
945	2458	GO:0048050	0.002
946	65	GO:0000404	0.002
947	1123	GO:0016342	0.002
948	710	GO:0007089	0.002
949	3128	GO:0071447	0.002
950	2082	GO:0043167	0.002
951	2280	GO:0045664	0.002
952	35	GO:0000159	0.002
953	1049	GO:0014012	0.002
954	438	GO:0004728	0.002
955	880	GO:0009008	0.002
956	2687	GO:0051216	0.002
957	905	GO:0009628	0.002
958	2870	GO:0060422	0.002
959	2634	GO:0050820	0.002
960	2381	GO:0046570	0.002
961	1461	GO:0030967	0.002
962	1686	GO:0032909	0.002
963	602	GO:0006260	0.002
964	3164	GO:0071893	0.002
965	3057	GO:0070489	0.002
966	2898	GO:0060547	0.002
967	2758	GO:0051683	0.002
968	1820	GO:0034766	0.002
969	317	GO:0003085	0.002
970	461	GO:0005006	0.002
971	3265	GO:0090267	0.002
972	3271	GO:0090311	0.002
973	1648	GO:0032613	0.002
974	1418	GO:0030574	0.002
975	263	GO:0002204	0.002
976	261	GO:0002162	0.002
977	841	GO:0008283	0.002
978	2443	GO:0047496	0.002
979	1205	GO:0019003	0.002
980	210	GO:0001880	0.002
981	701	GO:0007059	0.002
982	1198	GO:0018205	0.002
983	3336	GO:2000334	0.002
984	867	GO:0008595	0.002
985	2462	GO:0048096	0.002
986	2247	GO:0045425	0.002
987	609	GO:0006272	0.002
988	1676	GO:0032862	0.002
989	2872	GO:0060429	0.002
990	2396	GO:0046653	0.002
991	2912	GO:0060596	0.002
992	2581	GO:0050431	0.002
993	2463	GO:0048102	0.002
994	834	GO:0008252	0.002
995	847	GO:0008309	0.002
996	2833	GO:0060213	0.002
997	3332	GO:2000279	0.002
998	3149	GO:0071691	0.002
999	3411	GO:2001271	0.002
1000	570	GO:0005902	0.002

[truncated: 10 more sheets: Dateset6 MaxRel Table, Dateset6 mRMR Table, Dateset7 MaxRel Table, Dateset7 mRMR Table, Dateset8 MaxRel Table, Dateset8 mRMR Table, Dateset9 MaxRel Table, Dateset9 mRMR Table, Dateset10 MaxRel Table, Dateset10 mRMR Table]
