# Supplementary material for: Prediction and Analysis of Retinoblastoma Related Genes through Gene Ontology and KEGG
Source: Biomed Res Int. 2013 Aug 13;2013:304029. doi: 10.1155/2013/304029 (PMC3755425; doi:10.1155/2013/304029)
Supplement: Supplementary file 5 [file 304029.f5.xlsx]

## Sheet: Optimal GO terms
GO ID	GO name	class
GO:0000018	regulation of DNA recombination	biological_process
GO:0000022	mitotic spindle elongation	biological_process
GO:0000064	L-ornithine transmembrane transporter activity	molecular_function
GO:0000073	spindle pole body separation	biological_process
GO:0000077	DNA damage checkpoint	biological_process
GO:0000079	regulation of cyclin-dependent protein kinase activity	biological_process
GO:0000083	regulation of transcription involved in G1/S phase of mitotic cell cycle	biological_process
GO:0000085	G2 phase of mitotic cell cycle	biological_process
GO:0000086	G2/M transition of mitotic cell cycle	biological_process
GO:0000087	M phase of mitotic cell cycle	biological_process
GO:0000088	mitotic prophase	biological_process
GO:0000098	sulfur amino acid catabolic process	biological_process
GO:0000139	Golgi membrane	cellular_component
GO:0000212	meiotic spindle organization	biological_process
GO:0000224	peptide-N4-(N-acetyl-beta-glucosaminyl)asparagine amidase activity	molecular_function
GO:0000226	microtubule cytoskeleton organization	biological_process
GO:0000228	nuclear chromosome	cellular_component
GO:0000236	mitotic prometaphase	biological_process
GO:0000281	cytokinesis after mitosis	biological_process
GO:0000285	1-phosphatidylinositol-3-phosphate 5-kinase activity	molecular_function
GO:0000293	ferric-chelate reductase activity	molecular_function
GO:0000380	alternative nuclear mRNA splicing, via spliceosome	biological_process
GO:0000386	second spliceosomal transesterification activity	molecular_function
GO:0000405	bubble DNA binding	molecular_function
GO:0000406	double-strand/single-strand DNA junction binding	molecular_function
GO:0000444	MIS12/MIND type complex	cellular_component
GO:0000506	glycosylphosphatidylinositol-N-acetylglucosaminyltransferase (GPI-GnT) complex	cellular_component
GO:0000578	embryonic axis specification	biological_process
GO:0000701	purine-specific mismatch base pair DNA N-glycosylase activity	molecular_function
GO:0000710	meiotic mismatch repair	biological_process
GO:0000712	resolution of meiotic recombination intermediates	biological_process
GO:0000724	double-strand break repair via homologous recombination	biological_process
GO:0000775	chromosome, centromeric region	cellular_component
GO:0000780	condensed nuclear chromosome, centromeric region	cellular_component
GO:0000781	chromosome, telomeric region	cellular_component
GO:0000783	nuclear telomere cap complex	cellular_component
GO:0000794	condensed nuclear chromosome	cellular_component
GO:0000797	condensin core heterodimer	cellular_component
GO:0000800	lateral element	cellular_component
GO:0000805	X chromosome	cellular_component
GO:0000808	origin recognition complex	cellular_component
GO:0000819	sister chromatid segregation	biological_process
GO:0000900	translation repressor activity, nucleic acid binding	molecular_function
GO:0000915	cytokinesis, actomyosin contractile ring assembly	biological_process
GO:0000922	spindle pole	cellular_component
GO:0000940	condensed chromosome outer kinetochore	cellular_component
GO:0000942	condensed nuclear chromosome outer kinetochore	cellular_component
GO:0000978	RNA polymerase II core promoter proximal region sequence-specific DNA binding	molecular_function
GO:0000987	core promoter proximal region sequence-specific DNA binding	molecular_function
GO:0000988	protein binding transcription factor activity	molecular_function
GO:0001042	RNA polymerase I core binding	molecular_function
GO:0001046	core promoter sequence-specific DNA binding	molecular_function
GO:0001102	RNA polymerase II activating transcription factor binding	molecular_function
GO:0001106	RNA polymerase II transcription corepressor activity	molecular_function
GO:0001300	chronological cell aging	biological_process
GO:0001605	adrenomedullin receptor activity	molecular_function
GO:0001655	urogenital system development	biological_process
GO:0001739	sex chromatin	cellular_component
GO:0001837	epithelial to mesenchymal transition	biological_process
GO:0001848	complement binding	molecular_function
GO:0001889	liver development	biological_process
GO:0001939	female pronucleus	cellular_component
GO:0001942	hair follicle development	biological_process
GO:0001953	negative regulation of cell-matrix adhesion	biological_process
GO:0002009	morphogenesis of an epithelium	biological_process
GO:0002011	morphogenesis of an epithelial sheet	biological_process
GO:0002072	optic cup morphogenesis involved in camera-type eye development	biological_process
GO:0002079	inner acrosomal membrane	cellular_component
GO:0002083	4-hydroxybenzoate decaprenyltransferase activity	molecular_function
GO:0002102	podosome	cellular_component
GO:0002162	dystroglycan binding	molecular_function
GO:0002204	somatic recombination of immunoglobulin genes involved in immune response	biological_process
GO:0002215	defense response to nematode	biological_process
GO:0002244	hemopoietic progenitor cell differentiation	biological_process
GO:0002462	tolerance induction to nonself antigen	biological_process
GO:0002495	antigen processing and presentation of peptide antigen via MHC class II	biological_process
GO:0002520	immune system development	biological_process
GO:0002573	myeloid leukocyte differentiation	biological_process
GO:0002651	positive regulation of tolerance induction to self antigen	biological_process
GO:0002674	negative regulation of acute inflammatory response	biological_process
GO:0002684	positive regulation of immune system process	biological_process
GO:0002891	positive regulation of immunoglobulin mediated immune response	biological_process
GO:0003062	regulation of heart rate by chemical signal	biological_process
GO:0003131	mesodermal-endodermal cell signaling	biological_process
GO:0003149	membranous septum morphogenesis	biological_process
GO:0003167	atrioventricular bundle cell differentiation	biological_process
GO:0003197	endocardial cushion development	biological_process
GO:0003279	cardiac septum development	biological_process
GO:0003283	atrial septum development	biological_process
GO:0003289	atrial septum primum morphogenesis	biological_process
GO:0003334	keratinocyte development	biological_process
GO:0003357	noradrenergic neuron differentiation	biological_process
GO:0003382	epithelial cell morphogenesis	biological_process
GO:0003691	double-stranded telomeric DNA binding	molecular_function
GO:0003830	beta-1,4-mannosylglycoprotein 4-beta-N-acetylglucosaminyltransferase activity	molecular_function
GO:0003836	beta-galactoside (CMP) alpha-2,3-sialyltransferase activity	molecular_function
GO:0003839	gamma-glutamylcyclotransferase activity	molecular_function
GO:0003868	4-hydroxyphenylpyruvate dioxygenase activity	molecular_function
GO:0003878	ATP citrate synthase activity	molecular_function
GO:0003913	DNA photolyase activity	molecular_function
GO:0003916	DNA topoisomerase activity	molecular_function
GO:0003917	DNA topoisomerase type I activity	molecular_function
GO:0003918	DNA topoisomerase (ATP-hydrolyzing) activity	molecular_function
GO:0003953	NAD+ nucleosidase activity	molecular_function
GO:0003979	UDP-glucose 6-dehydrogenase activity	molecular_function
GO:0003985	acetyl-CoA C-acetyltransferase activity	molecular_function
GO:0004029	aldehyde dehydrogenase (NAD) activity	molecular_function
GO:0004090	carbonyl reductase (NADPH) activity	molecular_function
GO:0004113	2',3'-cyclic-nucleotide 3'-phosphodiesterase activity	molecular_function
GO:0004137	deoxycytidine kinase activity	molecular_function
GO:0004324	ferredoxin-NADP+ reductase activity	molecular_function
GO:0004333	fumarate hydratase activity	molecular_function
GO:0004342	glucosamine-6-phosphate deaminase activity	molecular_function
GO:0004407	histone deacetylase activity	molecular_function
GO:0004415	hyalurononglucosaminidase activity	molecular_function
GO:0004422	hypoxanthine phosphoribosyltransferase activity	molecular_function
GO:0004450	isocitrate dehydrogenase (NADP+) activity	molecular_function
GO:0004572	mannosyl-oligosaccharide 1,3-1,6-alpha-mannosidase activity	molecular_function
GO:0004591	oxoglutarate dehydrogenase (succinyl-transferring) activity	molecular_function
GO:0004659	prenyltransferase activity	molecular_function
GO:0004674	protein serine/threonine kinase activity	molecular_function
GO:0004677	DNA-dependent protein kinase activity	molecular_function
GO:0004712	protein serine/threonine/tyrosine kinase activity	molecular_function
GO:0004719	protein-L-isoaspartate (D-aspartate) O-methyltransferase activity	molecular_function
GO:0004721	phosphoprotein phosphatase activity	molecular_function
GO:0004797	thymidine kinase activity	molecular_function
GO:0004799	thymidylate synthase activity	molecular_function
GO:0004843	ubiquitin-specific protease activity	molecular_function
GO:0004875	complement receptor activity	molecular_function
GO:0004887	thyroid hormone receptor activity	molecular_function
GO:0004943	C3a anaphylatoxin receptor activity	molecular_function
GO:0005010	insulin-like growth factor-activated receptor activity	molecular_function
GO:0005055	laminin receptor activity	molecular_function
GO:0005072	transforming growth factor beta receptor, cytoplasmic mediator activity	molecular_function
GO:0005112	Notch binding	molecular_function
GO:0005173	stem cell factor receptor binding	molecular_function
GO:0005176	ErbB-2 class receptor binding	molecular_function
GO:0005178	integrin binding	molecular_function
GO:0005198	structural molecule activity	molecular_function
GO:0005224	ATP-binding and phosphorylation-dependent chloride channel activity	molecular_function
GO:0005260	channel-conductance-controlling ATPase activity	molecular_function
GO:0005289	high affinity arginine transmembrane transporter activity	molecular_function
GO:0005313	L-glutamate transmembrane transporter activity	molecular_function
GO:0005316	high affinity inorganic phosphate:sodium symporter activity	molecular_function
GO:0005347	ATP transmembrane transporter activity	molecular_function
GO:0005353	fructose transmembrane transporter activity	molecular_function
GO:0005432	calcium:sodium antiporter activity	molecular_function
GO:0005452	inorganic anion exchanger activity	molecular_function
GO:0005488	binding	molecular_function
GO:0005497	androgen binding	molecular_function
GO:0005518	collagen binding	molecular_function
GO:0005520	insulin-like growth factor binding	molecular_function
GO:0005521	lamin binding	molecular_function
GO:0005540	hyaluronic acid binding	molecular_function
GO:0005577	fibrinogen complex	cellular_component
GO:0005586	collagen type III	cellular_component
GO:0005595	collagen type XII	cellular_component
GO:0005607	laminin-2 complex	cellular_component
GO:0005608	laminin-3 complex	cellular_component
GO:0005634	nucleus	cellular_component
GO:0005635	nuclear envelope	cellular_component
GO:0005637	nuclear inner membrane	cellular_component
GO:0005724	nuclear telomeric heterochromatin	cellular_component
GO:0005726	perichromatin fibrils	cellular_component
GO:0005741	mitochondrial outer membrane	cellular_component
GO:0005749	mitochondrial respiratory chain complex II	cellular_component
GO:0005795	Golgi stack	cellular_component
GO:0005813	centrosome	cellular_component
GO:0005814	centriole	cellular_component
GO:0005815	microtubule organizing center	cellular_component
GO:0005828	kinetochore microtubule	cellular_component
GO:0005873	plus-end kinesin complex	cellular_component
GO:0005912	adherens junction	cellular_component
GO:0005971	ribonucleoside-diphosphate reductase complex	cellular_component
GO:0006013	mannose metabolic process	biological_process
GO:0006043	glucosamine catabolic process	biological_process
GO:0006044	N-acetylglucosamine metabolic process	biological_process
GO:0006081	cellular aldehyde metabolic process	biological_process
GO:0006097	glyoxylate cycle	biological_process
GO:0006106	fumarate metabolic process	biological_process
GO:0006121	mitochondrial electron transport, succinate to ubiquinone	biological_process
GO:0006123	mitochondrial electron transport, cytochrome c to oxygen	biological_process
GO:0006166	purine ribonucleoside salvage	biological_process
GO:0006168	adenine salvage	biological_process
GO:0006178	guanine salvage	biological_process
GO:0006203	dGTP catabolic process	biological_process
GO:0006231	dTMP biosynthetic process	biological_process
GO:0006258	UDP-glucose catabolic process	biological_process
GO:0006259	DNA metabolic process	biological_process
GO:0006265	DNA topological change	biological_process
GO:0006268	DNA unwinding involved in replication	biological_process
GO:0006275	regulation of DNA replication	biological_process
GO:0006281	DNA repair	biological_process
GO:0006282	regulation of DNA repair	biological_process
GO:0006301	postreplication repair	biological_process
GO:0006302	double-strand break repair	biological_process
GO:0006303	double-strand break repair via nonhomologous end joining	biological_process
GO:0006310	DNA recombination	biological_process
GO:0006311	meiotic gene conversion	biological_process
GO:0006312	mitotic recombination	biological_process
GO:0006335	DNA replication-dependent nucleosome assembly	biological_process
GO:0006346	methylation-dependent chromatin silencing	biological_process
GO:0006353	DNA-dependent transcription, termination	biological_process
GO:0006354	DNA-dependent transcription, elongation	biological_process
GO:0006359	regulation of transcription from RNA polymerase III promoter	biological_process
GO:0006407	rRNA export from nucleus	biological_process
GO:0006461	protein complex assembly	biological_process
GO:0006470	protein dephosphorylation	biological_process
GO:0006491	N-glycan processing	biological_process
GO:0006513	protein monoubiquitination	biological_process
GO:0006516	glycoprotein catabolic process	biological_process
GO:0006533	aspartate catabolic process	biological_process
GO:0006598	polyamine catabolic process	biological_process
GO:0006612	protein targeting to membrane	biological_process
GO:0006642	triglyceride mobilization	biological_process
GO:0006655	phosphatidylglycerol biosynthetic process	biological_process
GO:0006730	one-carbon metabolic process	biological_process
GO:0006760	folic acid-containing compound metabolic process	biological_process
GO:0006790	sulfur compound metabolic process	biological_process
GO:0006796	phosphate-containing compound metabolic process	biological_process
GO:0006820	anion transport	biological_process
GO:0006835	dicarboxylic acid transport	biological_process
GO:0006865	amino acid transport	biological_process
GO:0006888	ER to Golgi vesicle-mediated transport	biological_process
GO:0006895	Golgi to endosome transport	biological_process
GO:0006904	vesicle docking involved in exocytosis	biological_process
GO:0006909	phagocytosis	biological_process
GO:0006910	phagocytosis, recognition	biological_process
GO:0006974	response to DNA damage stimulus	biological_process
GO:0006975	DNA damage induced protein phosphorylation	biological_process
GO:0007019	microtubule depolymerization	biological_process
GO:0007031	peroxisome organization	biological_process
GO:0007044	cell-substrate junction assembly	biological_process
GO:0007049	cell cycle	biological_process
GO:0007062	sister chromatid cohesion	biological_process
GO:0007064	mitotic sister chromatid cohesion	biological_process
GO:0007088	regulation of mitosis	biological_process
GO:0007091	mitotic metaphase/anaphase transition	biological_process
GO:0007095	mitotic cell cycle G2/M transition DNA damage checkpoint	biological_process
GO:0007098	centrosome cycle	biological_process
GO:0007099	centriole replication	biological_process
GO:0007108	cytokinesis, initiation of separation	biological_process
GO:0007126	meiosis	biological_process
GO:0007127	meiosis I	biological_process
GO:0007129	synapsis	biological_process
GO:0007141	male meiosis I	biological_process
GO:0007160	cell-matrix adhesion	biological_process
GO:0007219	Notch signaling pathway	biological_process
GO:0007402	ganglion mother cell fate determination	biological_process
GO:0007500	mesodermal cell fate determination	biological_process
GO:0007501	mesodermal cell fate specification	biological_process
GO:0007530	sex determination	biological_process
GO:0007599	hemostasis	biological_process
GO:0007622	rhythmic behavior	biological_process
GO:0008013	beta-catenin binding	molecular_function
GO:0008035	high-density lipoprotein particle binding	molecular_function
GO:0008037	cell recognition	biological_process
GO:0008049	male courtship behavior	biological_process
GO:0008073	ornithine decarboxylase inhibitor activity	molecular_function
GO:0008089	anterograde axon cargo transport	biological_process
GO:0008108	UDP-glucose:hexose-1-phosphate uridylyltransferase activity	molecular_function
GO:0008112	nicotinamide N-methyltransferase activity	molecular_function
GO:0008147	structural constituent of bone	molecular_function
GO:0008156	negative regulation of DNA replication	biological_process
GO:0008194	UDP-glycosyltransferase activity	molecular_function
GO:0008207	C21-steroid hormone metabolic process	biological_process
GO:0008209	androgen metabolic process	biological_process
GO:0008215	spermine metabolic process	biological_process
GO:0008236	serine-type peptidase activity	molecular_function
GO:0008238	exopeptidase activity	molecular_function
GO:0008239	dipeptidyl-peptidase activity	molecular_function
GO:0008262	importin-alpha export receptor activity	molecular_function
GO:0008265	Mo-molybdopterin cofactor sulfurase activity	molecular_function
GO:0008270	zinc ion binding	molecular_function
GO:0008272	sulfate transport	biological_process
GO:0008274	gamma-tubulin ring complex	cellular_component
GO:0008275	gamma-tubulin small complex	cellular_component
GO:0008278	cohesin complex	cellular_component
GO:0008283	cell proliferation	biological_process
GO:0008347	glial cell migration	biological_process
GO:0008349	MAP kinase kinase kinase kinase activity	molecular_function
GO:0008356	asymmetric cell division	biological_process
GO:0008389	coumarin 7-hydroxylase activity	molecular_function
GO:0008413	8-oxo-7,8-dihydroguanosine triphosphate pyrophosphatase activity	molecular_function
GO:0008420	CTD phosphatase activity	molecular_function
GO:0008424	glycoprotein 6-alpha-L-fucosyltransferase activity	molecular_function
GO:0008432	JUN kinase binding	molecular_function
GO:0008456	alpha-N-acetylgalactosaminidase activity	molecular_function
GO:0008475	procollagen-lysine 5-dioxygenase activity	molecular_function
GO:0008483	transaminase activity	molecular_function
GO:0008509	anion transmembrane transporter activity	molecular_function
GO:0008553	hydrogen-exporting ATPase activity, phosphorylative mechanism	molecular_function
GO:0008574	plus-end-directed microtubule motor activity	molecular_function
GO:0008595	anterior/posterior axis specification, embryo	biological_process
GO:0008608	attachment of spindle microtubules to kinetochore	biological_process
GO:0008821	crossover junction endodeoxyribonuclease activity	molecular_function
GO:0009048	dosage compensation by inactivation of X chromosome	biological_process
GO:0009081	branched-chain amino acid metabolic process	biological_process
GO:0009082	branched-chain amino acid biosynthetic process	biological_process
GO:0009157	deoxyribonucleoside monophosphate biosynthetic process	biological_process
GO:0009165	nucleotide biosynthetic process	biological_process
GO:0009186	deoxyribonucleoside diphosphate metabolic process	biological_process
GO:0009214	cyclic nucleotide catabolic process	biological_process
GO:0009234	menaquinone biosynthetic process	biological_process
GO:0009267	cellular response to starvation	biological_process
GO:0009294	DNA mediated transformation	biological_process
GO:0009330	DNA topoisomerase complex (ATP-hydrolyzing)	cellular_component
GO:0009346	citrate lyase complex	cellular_component
GO:0009378	four-way junction helicase activity	molecular_function
GO:0009401	phosphoenolpyruvate-dependent sugar phosphotransferase system	biological_process
GO:0009449	gamma-aminobutyric acid biosynthetic process	biological_process
GO:0009628	response to abiotic stimulus	biological_process
GO:0009649	entrainment of circadian clock	biological_process
GO:0009785	blue light signaling pathway	biological_process
GO:0009877	nodulation	biological_process
GO:0009882	blue light photoreceptor activity	molecular_function
GO:0009893	positive regulation of metabolic process	biological_process
GO:0009912	auditory receptor cell fate commitment	biological_process
GO:0010070	zygote asymmetric cell division	biological_process
GO:0010159	specification of organ position	biological_process
GO:0010333	terpene synthase activity	molecular_function
GO:0010389	regulation of G2/M transition of mitotic cell cycle	biological_process
GO:0010484	H3 histone acetyltransferase activity	molecular_function
GO:0010593	negative regulation of lamellipodium assembly	biological_process
GO:0010616	negative regulation of cardiac muscle adaptation	biological_process
GO:0010625	positive regulation of Schwann cell proliferation	biological_process
GO:0010626	negative regulation of Schwann cell proliferation	biological_process
GO:0010694	positive regulation of alkaline phosphatase activity	biological_process
GO:0010719	negative regulation of epithelial to mesenchymal transition	biological_process
GO:0010724	regulation of definitive erythrocyte differentiation	biological_process
GO:0010767	regulation of transcription from RNA polymerase II promoter in response to UV-induced DNA damage	biological_process
GO:0010771	negative regulation of cell morphogenesis involved in differentiation	biological_process
GO:0010835	regulation of protein ADP-ribosylation	biological_process
GO:0010837	regulation of keratinocyte proliferation	biological_process
GO:0010944	negative regulation of transcription by competitive promoter binding	biological_process
GO:0010952	positive regulation of peptidase activity	biological_process
GO:0010966	regulation of phosphate transport	biological_process
GO:0010972	negative regulation of G2/M transition of mitotic cell cycle	biological_process
GO:0010991	negative regulation of SMAD protein complex assembly	biological_process
GO:0010997	anaphase-promoting complex binding	molecular_function
GO:0012501	programmed cell death	biological_process
GO:0014013	regulation of gliogenesis	biological_process
GO:0014037	Schwann cell differentiation	biological_process
GO:0014044	Schwann cell development	biological_process
GO:0014732	skeletal muscle atrophy	biological_process
GO:0014741	negative regulation of muscle hypertrophy	biological_process
GO:0014912	negative regulation of smooth muscle cell migration	biological_process
GO:0015002	heme-copper terminal oxidase activity	molecular_function
GO:0015039	NADPH-adrenodoxin reductase activity	molecular_function
GO:0015125	bile acid transmembrane transporter activity	molecular_function
GO:0015129	lactate transmembrane transporter activity	molecular_function
GO:0015136	sialic acid transmembrane transporter activity	molecular_function
GO:0015149	hexose transmembrane transporter activity	molecular_function
GO:0015171	amino acid transmembrane transporter activity	molecular_function
GO:0015189	L-lysine transmembrane transporter activity	molecular_function
GO:0015217	ADP transmembrane transporter activity	molecular_function
GO:0015228	coenzyme A transmembrane transporter activity	molecular_function
GO:0015230	FAD transmembrane transporter activity	molecular_function
GO:0015254	glycerol channel activity	molecular_function
GO:0015297	antiporter activity	molecular_function
GO:0015327	cystine:glutamate antiporter activity	molecular_function
GO:0015439	heme-transporting ATPase activity	molecular_function
GO:0015501	glutamate:sodium symporter activity	molecular_function
GO:0015616	DNA translocase activity	molecular_function
GO:0015631	tubulin binding	molecular_function
GO:0015670	carbon dioxide transport	biological_process
GO:0015701	bicarbonate transport	biological_process
GO:0015705	iodide transport	biological_process
GO:0015727	lactate transport	biological_process
GO:0015739	sialic acid transport	biological_process
GO:0015755	fructose transport	biological_process
GO:0015807	L-amino acid transport	biological_process
GO:0015827	tryptophan transport	biological_process
GO:0015840	urea transport	biological_process
GO:0015866	ADP transport	biological_process
GO:0015867	ATP transport	biological_process
GO:0015871	choline transport	biological_process
GO:0015891	siderophore transport	biological_process
GO:0015923	mannosidase activity	molecular_function
GO:0015929	hexosaminidase activity	molecular_function
GO:0015936	coenzyme A metabolic process	biological_process
GO:0015949	nucleobase-containing small molecule interconversion	biological_process
GO:0015964	diadenosine triphosphate catabolic process	biological_process
GO:0016005	phospholipase A2 activator activity	molecular_function
GO:0016018	cyclosporin A binding	molecular_function
GO:0016202	regulation of striated muscle tissue development	biological_process
GO:0016231	beta-N-acetylglucosaminidase activity	molecular_function
GO:0016242	negative regulation of macroautophagy	biological_process
GO:0016308	1-phosphatidylinositol-4-phosphate 5-kinase activity	molecular_function
GO:0016323	basolateral plasma membrane	cellular_component
GO:0016324	apical plasma membrane	cellular_component
GO:0016338	calcium-independent cell-cell adhesion	biological_process
GO:0016342	catenin complex	cellular_component
GO:0016363	nuclear matrix	cellular_component
GO:0016447	somatic recombination of immunoglobulin gene segments	biological_process
GO:0016477	cell migration	biological_process
GO:0016480	negative regulation of transcription from RNA polymerase III promoter	biological_process
GO:0016538	cyclin-dependent protein kinase regulator activity	molecular_function
GO:0016570	histone modification	biological_process
GO:0016572	histone phosphorylation	biological_process
GO:0016574	histone ubiquitination	biological_process
GO:0016575	histone deacetylation	biological_process
GO:0016581	NuRD complex	cellular_component
GO:0016592	mediator complex	cellular_component
GO:0016628	oxidoreductase activity, acting on the CH-CH group of donors, NAD or NADP as acceptor	molecular_function
GO:0016776	phosphotransferase activity, phosphate group as acceptor	molecular_function
GO:0016799	hydrolase activity, hydrolyzing N-glycosyl compounds	molecular_function
GO:0016805	dipeptidase activity	molecular_function
GO:0016888	endodeoxyribonuclease activity, producing 5'-phosphomonoesters	molecular_function
GO:0016891	endoribonuclease activity, producing 5'-phosphomonoesters	molecular_function
GO:0016922	ligand-dependent nuclear receptor binding	molecular_function
GO:0016933	extracellular-glycine-gated ion channel activity	molecular_function
GO:0016938	kinesin I complex	cellular_component
GO:0016971	flavin-linked sulfhydryl oxidase activity	molecular_function
GO:0017018	myosin phosphatase activity	molecular_function
GO:0017055	negative regulation of RNA polymerase II transcriptional preinitiation complex assembly	biological_process
GO:0017082	mineralocorticoid receptor activity	molecular_function
GO:0017123	Ral GTPase activator activity	molecular_function
GO:0017160	Ral GTPase binding	molecular_function
GO:0017176	phosphatidylinositol N-acetylglucosaminyltransferase activity	molecular_function
GO:0018023	peptidyl-lysine trimethylation	biological_process
GO:0018205	peptidyl-lysine modification	biological_process
GO:0019035	viral integration complex	cellular_component
GO:0019066	translocation of virus into host cell	biological_process
GO:0019088	immortalization of host cell by virus	biological_process
GO:0019104	DNA N-glycosylase activity	molecular_function
GO:0019206	nucleoside kinase activity	molecular_function
GO:0019208	phosphatase regulator activity	molecular_function
GO:0019211	phosphatase activator activity	molecular_function
GO:0019212	phosphatase inhibitor activity	molecular_function
GO:0019216	regulation of lipid metabolic process	biological_process
GO:0019217	regulation of fatty acid metabolic process	biological_process
GO:0019377	glycolipid catabolic process	biological_process
GO:0019388	galactose catabolic process	biological_process
GO:0019646	aerobic electron transport chain	biological_process
GO:0019724	B cell mediated immunity	biological_process
GO:0019782	ISG15 activating enzyme activity	molecular_function
GO:0019827	stem cell maintenance	biological_process
GO:0019865	immunoglobulin binding	molecular_function
GO:0019899	enzyme binding	molecular_function
GO:0019966	interleukin-1 binding	molecular_function
GO:0019985	translesion synthesis	biological_process
GO:0021526	medial motor column neuron differentiation	biological_process
GO:0021569	rhombomere 3 development	biological_process
GO:0021612	facial nerve structural organization	biological_process
GO:0021660	rhombomere 3 formation	biological_process
GO:0021666	rhombomere 5 formation	biological_process
GO:0021695	cerebellar cortex development	biological_process
GO:0021761	limbic system development	biological_process
GO:0021773	striatal medium spiny neuron differentiation	biological_process
GO:0021785	branchiomotor neuron axon guidance	biological_process
GO:0021816	extension of a leading process involved in cell motility in cerebral cortex radial glia guided migration	biological_process
GO:0021858	GABAergic neuron differentiation in basal ganglia	biological_process
GO:0021873	forebrain neuroblast division	biological_process
GO:0021877	forebrain neuron fate commitment	biological_process
GO:0021889	olfactory bulb interneuron differentiation	biological_process
GO:0021895	cerebral cortex neuron differentiation	biological_process
GO:0021942	radial glia guided migration of Purkinje cell	biological_process
GO:0021983	pituitary gland development	biological_process
GO:0021987	cerebral cortex development	biological_process
GO:0022027	interkinetic nuclear migration	biological_process
GO:0030030	cell projection organization	biological_process
GO:0030056	hemidesmosome	cellular_component
GO:0030097	hemopoiesis	biological_process
GO:0030127	COPII vesicle coat	cellular_component
GO:0030134	ER to Golgi transport vesicle	cellular_component
GO:0030140	trans-Golgi network transport vesicle	cellular_component
GO:0030174	regulation of DNA-dependent DNA replication initiation	biological_process
GO:0030221	basophil differentiation	biological_process
GO:0030261	chromosome condensation	biological_process
GO:0030284	estrogen receptor activity	molecular_function
GO:0030291	protein serine/threonine kinase inhibitor activity	molecular_function
GO:0030301	cholesterol transport	biological_process
GO:0030306	ADP-ribosylation factor binding	molecular_function
GO:0030321	transepithelial chloride transport	biological_process
GO:0030331	estrogen receptor binding	molecular_function
GO:0030337	DNA polymerase processivity factor activity	molecular_function
GO:0030362	protein phosphatase type 4 regulator activity	molecular_function
GO:0030379	neurotensin receptor activity, non-G-protein coupled	molecular_function
GO:0030414	peptidase inhibitor activity	molecular_function
GO:0030422	production of siRNA involved in RNA interference	biological_process
GO:0030423	targeting of mRNA for destruction involved in RNA interference	biological_process
GO:0030496	midbody	cellular_component
GO:0030500	regulation of bone mineralization	biological_process
GO:0030511	positive regulation of transforming growth factor beta receptor signaling pathway	biological_process
GO:0030512	negative regulation of transforming growth factor beta receptor signaling pathway	biological_process
GO:0030514	negative regulation of BMP signaling pathway	biological_process
GO:0030540	female genitalia development	biological_process
GO:0030616	transforming growth factor beta receptor, common-partner cytoplasmic mediator activity	molecular_function
GO:0030641	regulation of cellular pH	biological_process
GO:0030660	Golgi-associated vesicle membrane	cellular_component
GO:0030748	amine N-methyltransferase activity	molecular_function
GO:0030844	positive regulation of intermediate filament depolymerization	biological_process
GO:0030892	mitotic cohesin complex	cellular_component
GO:0030893	meiotic cohesin complex	cellular_component
GO:0030951	establishment or maintenance of microtubule cytoskeleton polarity	biological_process
GO:0030953	astral microtubule organization	biological_process
GO:0030976	thiamine pyrophosphate binding	molecular_function
GO:0031052	chromosome breakage	biological_process
GO:0031065	positive regulation of histone deacetylation	biological_process
GO:0031081	nuclear pore distribution	biological_process
GO:0031098	stress-activated protein kinase signaling cascade	biological_process
GO:0031102	neuron projection regeneration	biological_process
GO:0031122	cytoplasmic microtubule organization	biological_process
GO:0031252	cell leading edge	cellular_component
GO:0031265	CD95 death-inducing signaling complex	cellular_component
GO:0031297	replication fork processing	biological_process
GO:0031298	replication fork protection complex	cellular_component
GO:0031301	integral to organelle membrane	cellular_component
GO:0031323	regulation of cellular metabolic process	biological_process
GO:0031345	negative regulation of cell projection organization	biological_process
GO:0031346	positive regulation of cell projection organization	biological_process
GO:0031427	response to methotrexate	biological_process
GO:0031436	BRCA1-BARD1 complex	cellular_component
GO:0031442	positive regulation of mRNA 3'-end processing	biological_process
GO:0031507	heterochromatin assembly	biological_process
GO:0031508	centromeric heterochromatin assembly	biological_process
GO:0031523	Myb complex	cellular_component
GO:0031572	G2/M transition DNA damage checkpoint	biological_process
GO:0031576	G2/M transition checkpoint	biological_process
GO:0031619	homologous chromosome orientation involved in meiotic metaphase I plate congression	biological_process
GO:0031641	regulation of myelination	biological_process
GO:0031643	positive regulation of myelination	biological_process
GO:0031666	positive regulation of lipopolysaccharide-mediated signaling pathway	biological_process
GO:0031931	TORC1 complex	cellular_component
GO:0031932	TORC2 complex	cellular_component
GO:0031998	regulation of fatty acid beta-oxidation	biological_process
GO:0032023	trypsinogen activation	biological_process
GO:0032077	positive regulation of deoxyribonuclease activity	biological_process
GO:0032095	regulation of response to food	biological_process
GO:0032116	SMC loading complex	cellular_component
GO:0032133	chromosome passenger complex	cellular_component
GO:0032139	dinucleotide insertion or deletion binding	molecular_function
GO:0032142	single guanine insertion binding	molecular_function
GO:0032143	single thymine insertion binding	molecular_function
GO:0032154	cleavage furrow	cellular_component
GO:0032181	dinucleotide repeat insertion binding	molecular_function
GO:0032263	GMP salvage	biological_process
GO:0032264	IMP salvage	biological_process
GO:0032288	myelin assembly	biological_process
GO:0032290	peripheral nervous system myelin formation	biological_process
GO:0032299	ribonuclease H2 complex	cellular_component
GO:0032301	MutSalpha complex	cellular_component
GO:0032302	MutSbeta complex	cellular_component
GO:0032319	regulation of Rho GTPase activity	biological_process
GO:0032354	response to follicle-stimulating hormone stimulus	biological_process
GO:0032357	oxidized purine DNA binding	molecular_function
GO:0032370	positive regulation of lipid transport	biological_process
GO:0032374	regulation of cholesterol transport	biological_process
GO:0032405	MutLalpha complex binding	molecular_function
GO:0032422	purine-rich negative regulatory element binding	molecular_function
GO:0032436	positive regulation of proteasomal ubiquitin-dependent protein catabolic process	biological_process
GO:0032444	activin responsive factor complex	cellular_component
GO:0032463	negative regulation of protein homooligomerization	biological_process
GO:0032467	positive regulation of cytokinesis	biological_process
GO:0032486	Rap protein signal transduction	biological_process
GO:0032509	endosome transport via multivesicular body sorting pathway	biological_process
GO:0032542	sulfiredoxin activity	molecular_function
GO:0032548	pyrimidine deoxyribonucleoside binding	molecular_function
GO:0032570	response to progesterone stimulus	biological_process
GO:0032580	Golgi cisterna membrane	cellular_component
GO:0032680	regulation of tumor necrosis factor production	biological_process
GO:0032696	negative regulation of interleukin-13 production	biological_process
GO:0032799	low-density lipoprotein receptor particle metabolic process	biological_process
GO:0032802	low-density lipoprotein particle receptor catabolic process	biological_process
GO:0032803	regulation of low-density lipoprotein particle receptor catabolic process	biological_process
GO:0032808	lacrimal gland development	biological_process
GO:0032810	sterol response element binding	molecular_function
GO:0032859	activation of Ral GTPase activity	biological_process
GO:0032863	activation of Rac GTPase activity	biological_process
GO:0032864	activation of Cdc42 GTPase activity	biological_process
GO:0032876	negative regulation of DNA endoreduplication	biological_process
GO:0032909	regulation of transforming growth factor beta2 production	biological_process
GO:0032916	positive regulation of transforming growth factor beta3 production	biological_process
GO:0032967	positive regulation of collagen biosynthetic process	biological_process
GO:0032993	protein-DNA complex	cellular_component
GO:0033145	positive regulation of intracellular steroid hormone receptor signaling pathway	biological_process
GO:0033148	positive regulation of intracellular estrogen receptor signaling pathway	biological_process
GO:0033153	T cell receptor V(D)J recombination	biological_process
GO:0033193	Lsd1/2 complex	cellular_component
GO:0033205	cell cycle cytokinesis	biological_process
GO:0033261	regulation of S phase	biological_process
GO:0033262	regulation of DNA replication involved in S phase	biological_process
GO:0033484	nitric oxide homeostasis	biological_process
GO:0033574	response to testosterone stimulus	biological_process
GO:0033578	protein glycosylation in Golgi	biological_process
GO:0033593	BRCA2-MAGE-D1 complex	cellular_component
GO:0033594	response to hydroxyisoflavone	biological_process
GO:0033596	TSC1-TSC2 complex	cellular_component
GO:0033598	mammary gland epithelial cell proliferation	biological_process
GO:0033629	negative regulation of cell adhesion mediated by integrin	biological_process
GO:0033630	positive regulation of cell adhesion mediated by integrin	biological_process
GO:0033673	negative regulation of kinase activity	biological_process
GO:0033690	positive regulation of osteoblast proliferation	biological_process
GO:0033762	response to glucagon stimulus	biological_process
GO:0033906	hyaluronoglucuronidase activity	molecular_function
GO:0033993	response to lipid	biological_process
GO:0034045	pre-autophagosomal structure membrane	cellular_component
GO:0034056	estrogen response element binding	molecular_function
GO:0034088	maintenance of mitotic sister chromatid cohesion	biological_process
GO:0034098	Cdc48p-Npl4p-Ufd1p AAA ATPase complex	cellular_component
GO:0034190	apolipoprotein receptor binding	molecular_function
GO:0034244	negative regulation of transcription elongation from RNA polymerase II promoter	biological_process
GO:0034333	adherens junction assembly	biological_process
GO:0034389	lipid particle organization	biological_process
GO:0034421	post-translational protein acetylation	biological_process
GO:0034451	centriolar satellite	cellular_component
GO:0034453	microtubule anchoring	biological_process
GO:0034498	early endosome to Golgi transport	biological_process
GO:0034501	protein localization to kinetochore	biological_process
GO:0034509	centromeric core chromatin assembly	biological_process
GO:0034649	histone demethylase activity (H3-monomethyl-K4 specific)	molecular_function
GO:0034676	alpha6-beta4 integrin complex	cellular_component
GO:0034699	response to luteinizing hormone stimulus	biological_process
GO:0034722	gamma-glutamyl-peptidase activity	molecular_function
GO:0034766	negative regulation of ion transmembrane transport	biological_process
GO:0034770	histone H4-K20 methylation	biological_process
GO:0034773	histone H4-K20 trimethylation	biological_process
GO:0035051	cardiac cell differentiation	biological_process
GO:0035064	methylated histone residue binding	molecular_function
GO:0035065	regulation of histone acetylation	biological_process
GO:0035104	positive regulation of transcription via sterol regulatory element binding	biological_process
GO:0035117	embryonic arm morphogenesis	biological_process
GO:0035140	arm morphogenesis	biological_process
GO:0035173	histone kinase activity	molecular_function
GO:0035174	histone serine kinase activity	molecular_function
GO:0035189	Rb-E2F complex	cellular_component
GO:0035195	gene silencing by miRNA	biological_process
GO:0035196	production of miRNAs involved in gene silencing by miRNA	biological_process
GO:0035234	germ cell programmed cell death	biological_process
GO:0035261	external genitalia morphogenesis	biological_process
GO:0035264	multicellular organism growth	biological_process
GO:0035284	brain segmentation	biological_process
GO:0035307	positive regulation of protein dephosphorylation	biological_process
GO:0035308	negative regulation of protein dephosphorylation	biological_process
GO:0035313	wound healing, spreading of epidermal cells	biological_process
GO:0035330	regulation of hippo signaling cascade	biological_process
GO:0035331	negative regulation of hippo signaling cascade	biological_process
GO:0035349	coenzyme A transmembrane transport	biological_process
GO:0035350	FAD transmembrane transport	biological_process
GO:0035371	microtubule plus end	cellular_component
GO:0035372	protein localization to microtubule	biological_process
GO:0035404	histone-serine phosphorylation	biological_process
GO:0035428	hexose transmembrane transport	biological_process
GO:0035491	positive regulation of leukotriene production involved in inflammatory response	biological_process
GO:0035500	MH2 domain binding	molecular_function
GO:0035501	MH1 domain binding	molecular_function
GO:0035518	histone H2A monoubiquitination	biological_process
GO:0035519	protein K29-linked ubiquitination	biological_process
GO:0035520	monoubiquitinated protein deubiquitination	biological_process
GO:0035539	8-oxo-7,8-dihydrodeoxyguanosine triphosphate pyrophosphatase activity	molecular_function
GO:0035617	stress granule disassembly	biological_process
GO:0035621	ER to Golgi ceramide transport	biological_process
GO:0035624	receptor transactivation	biological_process
GO:0035708	interleukin-4-dependent isotype switching to IgE isotypes	biological_process
GO:0035709	memory T cell activation	biological_process
GO:0035748	myelin sheath abaxonal region	cellular_component
GO:0035873	lactate transmembrane transport	biological_process
GO:0035978	histone H2A-S139 phosphorylation	biological_process
GO:0035987	endodermal cell differentiation	biological_process
GO:0035990	tendon cell differentiation	biological_process
GO:0036071	N-glycan fucosylation	biological_process
GO:0040001	establishment of mitotic spindle localization	biological_process
GO:0040016	embryonic cleavage	biological_process
GO:0040017	positive regulation of locomotion	biological_process
GO:0040038	polar body extrusion after meiotic divisions	biological_process
GO:0042116	macrophage activation	biological_process
GO:0042159	lipoprotein catabolic process	biological_process
GO:0042162	telomeric DNA binding	molecular_function
GO:0042176	regulation of protein catabolic process	biological_process
GO:0042256	mature ribosome assembly	biological_process
GO:0042262	DNA protection	biological_process
GO:0042371	vitamin K biosynthetic process	biological_process
GO:0042412	taurine biosynthetic process	biological_process
GO:0042415	norepinephrine metabolic process	biological_process
GO:0042471	ear morphogenesis	biological_process
GO:0042487	regulation of odontogenesis of dentin-containing tooth	biological_process
GO:0042524	negative regulation of tyrosine phosphorylation of Stat5 protein	biological_process
GO:0042552	myelination	biological_process
GO:0042583	chromaffin granule	cellular_component
GO:0042585	germinal vesicle	cellular_component
GO:0042634	regulation of hair cycle	biological_process
GO:0042752	regulation of circadian rhythm	biological_process
GO:0042773	ATP synthesis coupled electron transport	biological_process
GO:0042799	histone methyltransferase activity (H4-K20 specific)	molecular_function
GO:0042801	polo kinase kinase activity	molecular_function
GO:0042941	D-alanine transport	biological_process
GO:0042985	negative regulation of amyloid precursor protein biosynthetic process	biological_process
GO:0042992	negative regulation of transcription factor import into nucleus	biological_process
GO:0043015	gamma-tubulin binding	molecular_function
GO:0043047	single-stranded telomeric DNA binding	molecular_function
GO:0043085	positive regulation of catalytic activity	biological_process
GO:0043097	pyrimidine nucleoside salvage	biological_process
GO:0043112	receptor metabolic process	biological_process
GO:0043132	NAD transport	biological_process
GO:0043140	ATP-dependent 3'-5' DNA helicase activity	molecular_function
GO:0043142	single-stranded DNA-dependent ATPase activity	molecular_function
GO:0043161	proteasomal ubiquitin-dependent protein catabolic process	biological_process
GO:0043167	ion binding	molecular_function
GO:0043175	RNA polymerase core enzyme binding	molecular_function
GO:0043208	glycosphingolipid binding	molecular_function
GO:0043220	Schmidt-Lanterman incisure	cellular_component
GO:0043254	regulation of protein complex assembly	biological_process
GO:0043257	laminin-8 complex	cellular_component
GO:0043259	laminin-10 complex	cellular_component
GO:0043260	laminin-11 complex	cellular_component
GO:0043297	apical junction assembly	biological_process
GO:0043325	phosphatidylinositol-3,4-bisphosphate binding	molecular_function
GO:0043368	positive T cell selection	biological_process
GO:0043372	positive regulation of CD4-positive, alpha-beta T cell differentiation	biological_process
GO:0043393	regulation of protein binding	biological_process
GO:0043398	HLH domain binding	molecular_function
GO:0043409	negative regulation of MAPK cascade	biological_process
GO:0043426	MRF binding	molecular_function
GO:0043517	positive regulation of DNA damage response, signal transduction by p53 class mediator	biological_process
GO:0043518	negative regulation of DNA damage response, signal transduction by p53 class mediator	biological_process
GO:0043539	protein serine/threonine kinase activator activity	molecular_function
GO:0043545	molybdopterin cofactor metabolic process	biological_process
GO:0043586	tongue development	biological_process
GO:0043596	nuclear replication fork	cellular_component
GO:0043610	regulation of carbohydrate utilization	biological_process
GO:0043626	PCNA complex	cellular_component
GO:0043627	response to estrogen stimulus	biological_process
GO:0043648	dicarboxylic acid metabolic process	biological_process
GO:0043666	regulation of phosphoprotein phosphatase activity	biological_process
GO:0043697	cell dedifferentiation	biological_process
GO:0043985	histone H4-R3 methylation	biological_process
GO:0044029	hypomethylation of CpG island	biological_process
GO:0044091	membrane biogenesis	biological_process
GO:0044302	dentate gyrus mossy fiber	cellular_component
GO:0044314	protein K27-linked ubiquitination	biological_process
GO:0044327	dendritic spine head	cellular_component
GO:0044430	cytoskeletal part	cellular_component
GO:0044464	cell part	cellular_component
GO:0044539	long-chain fatty acid import	biological_process
GO:0045007	depurination	biological_process
GO:0045023	G0 to G1 transition	biological_process
GO:0045103	intermediate filament-based process	biological_process
GO:0045109	intermediate filament organization	biological_process
GO:0045120	pronucleus	cellular_component
GO:0045143	homologous chromosome segregation	biological_process
GO:0045171	intercellular bridge	cellular_component
GO:0045175	basal protein localization	biological_process
GO:0045178	basal part of cell	cellular_component
GO:0045179	apical cortex	cellular_component
GO:0045197	establishment or maintenance of epithelial cell apical/basal polarity	biological_process
GO:0045210	FasL biosynthetic process	biological_process
GO:0045239	tricarboxylic acid cycle enzyme complex	cellular_component
GO:0045296	cadherin binding	molecular_function
GO:0045404	positive regulation of interleukin-4 biosynthetic process	biological_process
GO:0045446	endothelial cell differentiation	biological_process
GO:0045502	dynein binding	molecular_function
GO:0045541	negative regulation of cholesterol biosynthetic process	biological_process
GO:0045542	positive regulation of cholesterol biosynthetic process	biological_process
GO:0045605	negative regulation of epidermal cell differentiation	biological_process
GO:0045616	regulation of keratinocyte differentiation	biological_process
GO:0045624	positive regulation of T-helper cell differentiation	biological_process
GO:0045682	regulation of epidermis development	biological_process
GO:0045716	positive regulation of low-density lipoprotein particle receptor biosynthetic process	biological_process
GO:0045717	negative regulation of fatty acid biosynthetic process	biological_process
GO:0045726	positive regulation of integrin biosynthetic process	biological_process
GO:0045769	negative regulation of asymmetric cell division	biological_process
GO:0045778	positive regulation of ossification	biological_process
GO:0045799	positive regulation of chromatin assembly or disassembly	biological_process
GO:0045839	negative regulation of mitosis	biological_process
GO:0045842	positive regulation of mitotic metaphase/anaphase transition	biological_process
GO:0045843	negative regulation of striated muscle tissue development	biological_process
GO:0045862	positive regulation of proteolysis	biological_process
GO:0045870	positive regulation of retroviral genome replication	biological_process
GO:0045875	negative regulation of sister chromatid cohesion	biological_process
GO:0045910	negative regulation of DNA recombination	biological_process
GO:0045916	negative regulation of complement activation	biological_process
GO:0045943	positive regulation of transcription from RNA polymerase I promoter	biological_process
GO:0045945	positive regulation of transcription from RNA polymerase III promoter	biological_process
GO:0045955	negative regulation of calcium ion-dependent exocytosis	biological_process
GO:0045964	positive regulation of dopamine metabolic process	biological_process
GO:0046038	GMP catabolic process	biological_process
GO:0046040	IMP metabolic process	biological_process
GO:0046060	dATP metabolic process	biological_process
GO:0046068	cGMP metabolic process	biological_process
GO:0046078	dUMP metabolic process	biological_process
GO:0046083	adenine metabolic process	biological_process
GO:0046092	deoxycytidine metabolic process	biological_process
GO:0046100	hypoxanthine metabolic process	biological_process
GO:0046134	pyrimidine nucleoside biosynthetic process	biological_process
GO:0046226	coumarin catabolic process	biological_process
GO:0046459	short-chain fatty acid metabolic process	biological_process
GO:0046580	negative regulation of Ras protein signal transduction	biological_process
GO:0046600	negative regulation of centriole replication	biological_process
GO:0046601	positive regulation of centriole replication	biological_process
GO:0046632	alpha-beta T cell differentiation	biological_process
GO:0046651	lymphocyte proliferation	biological_process
GO:0046653	tetrahydrofolate metabolic process	biological_process
GO:0046680	response to DDT	biological_process
GO:0046785	microtubule polymerization	biological_process
GO:0046826	negative regulation of protein export from nucleus	biological_process
GO:0046847	filopodium assembly	biological_process
GO:0046855	inositol phosphate dephosphorylation	biological_process
GO:0046903	secretion	biological_process
GO:0046912	transferase activity, transferring acyl groups, acyl groups converted into alkyl on transfer	molecular_function
GO:0046921	alpha-(1->6)-fucosyltransferase activity	molecular_function
GO:0046947	hydroxylysine biosynthetic process	biological_process
GO:0046952	ketone body catabolic process	biological_process
GO:0047288	monosialoganglioside sialyltransferase activity	molecular_function
GO:0047293	4-hydroxybenzoate nonaprenyltransferase activity	molecular_function
GO:0047408	alkenylglycerophosphocholine hydrolase activity	molecular_function
GO:0047409	alkenylglycerophosphoethanolamine hydrolase activity	molecular_function
GO:0047485	protein N-terminus binding	molecular_function
GO:0047710	bis(5'-adenosyl)-triphosphatase activity	molecular_function
GO:0047743	chlordecone reductase activity	molecular_function
GO:0047747	cholate-CoA ligase activity	molecular_function
GO:0047750	cholestenol delta-isomerase activity	molecular_function
GO:0047800	cysteamine dioxygenase activity	molecular_function
GO:0048024	regulation of nuclear mRNA splicing, via spliceosome	biological_process
GO:0048039	ubiquinone binding	molecular_function
GO:0048096	chromatin-mediated maintenance of transcription	biological_process
GO:0048168	regulation of neuronal synaptic plasticity	biological_process
GO:0048208	COPII vesicle coating	biological_process
GO:0048210	Golgi vesicle fusion to target membrane	biological_process
GO:0048227	plasma membrane to endosome transport	biological_process
GO:0048333	mesodermal cell differentiation	biological_process
GO:0048471	perinuclear region of cytoplasm	cellular_component
GO:0048478	replication fork protection	biological_process
GO:0048488	synaptic vesicle endocytosis	biological_process
GO:0048565	digestive tract development	biological_process
GO:0048592	eye morphogenesis	biological_process
GO:0048638	regulation of developmental growth	biological_process
GO:0048645	organ formation	biological_process
GO:0048665	neuron fate specification	biological_process
GO:0048683	regulation of collateral sprouting of intact axon in response to injury	biological_process
GO:0048703	embryonic viscerocranium morphogenesis	biological_process
GO:0048713	regulation of oligodendrocyte differentiation	biological_process
GO:0048730	epidermis morphogenesis	biological_process
GO:0048733	sebaceous gland development	biological_process
GO:0048762	mesenchymal cell differentiation	biological_process
GO:0048839	inner ear development	biological_process
GO:0048844	artery morphogenesis	biological_process
GO:0048857	neural nucleus development	biological_process
GO:0048858	cell projection morphogenesis	biological_process
GO:0048859	formation of anatomical boundary	biological_process
GO:0048878	chemical homeostasis	biological_process
GO:0050115	myosin-light-chain-phosphatase activity	molecular_function
GO:0050431	transforming growth factor beta binding	molecular_function
GO:0050512	lactosylceramide 4-alpha-galactosyltransferase activity	molecular_function
GO:0050655	dermatan sulfate proteoglycan metabolic process	biological_process
GO:0050681	androgen receptor binding	molecular_function
GO:0050693	LBD domain binding	molecular_function
GO:0050713	negative regulation of interleukin-1 beta secretion	biological_process
GO:0050767	regulation of neurogenesis	biological_process
GO:0050773	regulation of dendrite development	biological_process
GO:0050779	RNA destabilization	biological_process
GO:0050798	activated T cell proliferation	biological_process
GO:0050820	positive regulation of coagulation	biological_process
GO:0050849	negative regulation of calcium-mediated signaling	biological_process
GO:0050872	white fat cell differentiation	biological_process
GO:0050880	regulation of blood vessel size	biological_process
GO:0050902	leukocyte adhesive activation	biological_process
GO:0051010	microtubule plus-end binding	molecular_function
GO:0051041	positive regulation of calcium-independent cell-cell adhesion	biological_process
GO:0051096	positive regulation of helicase activity	biological_process
GO:0051168	nuclear export	biological_process
GO:0051170	nuclear import	biological_process
GO:0051225	spindle assembly	biological_process
GO:0051247	positive regulation of protein metabolic process	biological_process
GO:0051256	spindle midzone assembly involved in mitosis	biological_process
GO:0051271	negative regulation of cellular component movement	biological_process
GO:0051292	nuclear pore complex assembly	biological_process
GO:0051298	centrosome duplication	biological_process
GO:0051310	metaphase plate congression	biological_process
GO:0051322	anaphase	biological_process
GO:0051329	interphase of mitotic cell cycle	biological_process
GO:0051345	positive regulation of hydrolase activity	biological_process
GO:0051382	kinetochore assembly	biological_process
GO:0051444	negative regulation of ubiquitin-protein ligase activity	biological_process
GO:0051534	negative regulation of NFAT protein import into nucleus	biological_process
GO:0051560	mitochondrial calcium ion homeostasis	biological_process
GO:0051563	smooth endoplasmic reticulum calcium ion homeostasis	biological_process
GO:0051571	positive regulation of histone H3-K4 methylation	biological_process
GO:0051574	positive regulation of histone H3-K9 methylation	biological_process
GO:0051580	regulation of neurotransmitter uptake	biological_process
GO:0051635	bacterial cell surface binding	molecular_function
GO:0051649	establishment of localization in cell	biological_process
GO:0051724	NAD transporter activity	molecular_function
GO:0051726	regulation of cell cycle	biological_process
GO:0051754	meiotic sister chromatid cohesion, centromeric	biological_process
GO:0051782	negative regulation of cell division	biological_process
GO:0051797	regulation of hair follicle development	biological_process
GO:0051880	G-quadruplex DNA binding	molecular_function
GO:0051901	positive regulation of mitochondrial depolarization	biological_process
GO:0051974	negative regulation of telomerase activity	biological_process
GO:0051987	positive regulation of attachment of spindle microtubules to kinetochore	biological_process
GO:0052657	guanine phosphoribosyltransferase activity	molecular_function
GO:0052739	phosphatidylserine 1-acylhydrolase activity	molecular_function
GO:0052740	1-acyl-2-lysophosphatidylserine acylhydrolase activity	molecular_function
GO:0052899	N(1),N(12)-diacetylspermine:oxygen oxidoreductase (3-acetamidopropanal-forming) activity	molecular_function
GO:0052902	spermidine:oxygen oxidoreductase (3-aminopropanal-forming) activity	molecular_function
GO:0052903	N1-acetylspermine:oxygen oxidoreductase (3-acetamidopropanal-forming) activity	molecular_function
GO:0052904	N1-acetylspermidine:oxygen oxidoreductase (3-acetamidopropanal-forming) activity	molecular_function
GO:0055007	cardiac muscle cell differentiation	biological_process
GO:0055096	low-density lipoprotein particle mediated signaling	biological_process
GO:0055100	adiponectin binding	molecular_function
GO:0055105	ubiquitin-protein ligase inhibitor activity	molecular_function
GO:0055108	Golgi to transport vesicle transport	biological_process
GO:0060004	reflex	biological_process
GO:0060009	Sertoli cell development	biological_process
GO:0060020	Bergmann glial cell differentiation	biological_process
GO:0060044	negative regulation of cardiac muscle cell proliferation	biological_process
GO:0060051	negative regulation of protein glycosylation	biological_process
GO:0060068	vagina development	biological_process
GO:0060113	inner ear receptor cell differentiation	biological_process
GO:0060123	regulation of growth hormone secretion	biological_process
GO:0060213	positive regulation of nuclear-transcribed mRNA poly(A) tail shortening	biological_process
GO:0060217	hemangioblast cell differentiation	biological_process
GO:0060236	regulation of mitotic spindle organization	biological_process
GO:0060252	positive regulation of glial cell proliferation	biological_process
GO:0060253	negative regulation of glial cell proliferation	biological_process
GO:0060266	negative regulation of respiratory burst involved in inflammatory response	biological_process
GO:0060272	embryonic skeletal joint morphogenesis	biological_process
GO:0060292	long term synaptic depression	biological_process
GO:0060317	cardiac epithelial to mesenchymal transition	biological_process
GO:0060318	definitive erythrocyte differentiation	biological_process
GO:0060356	leucine import	biological_process
GO:0060375	regulation of mast cell differentiation	biological_process
GO:0060390	regulation of SMAD protein import into nucleus	biological_process
GO:0060394	negative regulation of pathway-restricted SMAD protein phosphorylation	biological_process
GO:0060412	ventricular septum morphogenesis	biological_process
GO:0060433	bronchus development	biological_process
GO:0060440	trachea formation	biological_process
GO:0060449	bud elongation involved in lung branching	biological_process
GO:0060547	negative regulation of necrotic cell death	biological_process
GO:0060560	developmental growth involved in morphogenesis	biological_process
GO:0060564	negative regulation of mitotic anaphase-promoting complex activity	biological_process
GO:0060596	mammary placode formation	biological_process
GO:0060598	dichotomous subdivision of terminal units involved in mammary gland duct morphogenesis	biological_process
GO:0060599	lateral sprouting involved in mammary gland duct morphogenesis	biological_process
GO:0060623	regulation of chromosome condensation	biological_process
GO:0060628	regulation of ER to Golgi vesicle-mediated transport	biological_process
GO:0060668	regulation of branching involved in salivary gland morphogenesis by extracellular matrix-epithelial cell signaling	biological_process
GO:0060686	negative regulation of prostatic bud formation	biological_process
GO:0060710	chorio-allantoic fusion	biological_process
GO:0060743	epithelial cell maturation involved in prostate gland development	biological_process
GO:0060770	negative regulation of epithelial cell proliferation involved in prostate gland development	biological_process
GO:0060821	inactivation of X chromosome by DNA methylation	biological_process
GO:0060823	canonical Wnt receptor signaling pathway involved in neural plate anterior/posterior pattern formation	biological_process
GO:0060931	sinoatrial node cell development	biological_process
GO:0060976	coronary vasculature development	biological_process
GO:0061010	gall bladder development	biological_process
GO:0061035	regulation of cartilage development	biological_process
GO:0061044	negative regulation of vascular wound healing	biological_process
GO:0061045	negative regulation of wound healing	biological_process
GO:0061302	smooth muscle cell-matrix adhesion	biological_process
GO:0061338	atrioventricular node impulse conduction delay	biological_process
GO:0070123	transforming growth factor beta receptor activity, type III	molecular_function
GO:0070173	regulation of enamel mineralization	biological_process
GO:0070244	negative regulation of thymocyte apoptotic process	biological_process
GO:0070254	mucus secretion	biological_process
GO:0070295	renal water absorption	biological_process
GO:0070300	phosphatidic acid binding	molecular_function
GO:0070306	lens fiber cell differentiation	biological_process
GO:0070314	G1 to G0 transition	biological_process
GO:0070317	negative regulation of G0 to G1 transition	biological_process
GO:0070410	co-SMAD binding	molecular_function
GO:0070411	I-SMAD binding	molecular_function
GO:0070463	tubulin-dependent ATPase activity	molecular_function
GO:0070507	regulation of microtubule cytoskeleton organization	biological_process
GO:0070512	positive regulation of histone H4-K20 methylation	biological_process
GO:0070633	transepithelial transport	biological_process
GO:0070683	mitotic cell cycle G2/M transition decatenation checkpoint	biological_process
GO:0070700	BMP receptor binding	molecular_function
GO:0070734	histone H3-K27 methylation	biological_process
GO:0070779	D-aspartate import	biological_process
GO:0070816	phosphorylation of RNA polymerase II C-terminal domain	biological_process
GO:0070887	cellular response to chemical stimulus	biological_process
GO:0070969	ULK1-ATG13-FIP200 complex	cellular_component
GO:0070972	protein localization in endoplasmic reticulum	biological_process
GO:0070975	FHA domain binding	molecular_function
GO:0071062	alphav-beta3 integrin-vitronectin complex	cellular_component
GO:0071065	alpha9-beta1 integrin-vascular cell adhesion molecule-1 complex	cellular_component
GO:0071072	negative regulation of phospholipid biosynthetic process	biological_process
GO:0071107	response to parathyroid hormone stimulus	biological_process
GO:0071141	SMAD protein complex	cellular_component
GO:0071168	protein localization to chromatin	biological_process
GO:0071228	cellular response to tumor cell	biological_process
GO:0071253	connexin binding	molecular_function
GO:0071258	cellular response to gravity	biological_process
GO:0071283	cellular response to iron(III) ion	biological_process
GO:0071305	cellular response to vitamin D	biological_process
GO:0071335	hair follicle cell proliferation	biological_process
GO:0071372	cellular response to follicle-stimulating hormone stimulus	biological_process
GO:0071398	cellular response to fatty acid	biological_process
GO:0071449	cellular response to lipid hydroperoxide	biological_process
GO:0071559	response to transforming growth factor beta stimulus	biological_process
GO:0071564	npBAF complex	cellular_component
GO:0071593	lymphocyte aggregation	biological_process
GO:0071681	cellular response to indole-3-methanol	biological_process
GO:0071732	cellular response to nitric oxide	biological_process
GO:0071777	positive regulation of cell cycle cytokinesis	biological_process
GO:0071778	WINAC complex	cellular_component
GO:0071954	chemokine (C-C motif) ligand 11 production	biological_process
GO:0072102	glomerulus morphogenesis	biological_process
GO:0072125	negative regulation of glomerular mesangial cell proliferation	biological_process
GO:0072138	mesenchymal cell proliferation involved in ureteric bud development	biological_process
GO:0072160	nephron tubule epithelial cell differentiation	biological_process
GO:0072189	ureter development	biological_process
GO:0072205	metanephric collecting duct development	biological_process
GO:0072207	metanephric epithelium development	biological_process
GO:0072278	metanephric comma-shaped body morphogenesis	biological_process
GO:0072300	positive regulation of metanephric glomerulus development	biological_process
GO:0072372	primary cilium	cellular_component
GO:0072606	interleukin-8 secretion	biological_process
GO:0080121	AMP transport	biological_process
GO:0080122	AMP transmembrane transporter activity	molecular_function
GO:0085020	protein K6-linked ubiquitination	biological_process
GO:0090003	regulation of establishment of protein localization in plasma membrane	biological_process
GO:0090074	negative regulation of protein homodimerization activity	biological_process
GO:0090166	Golgi disassembly	biological_process
GO:0090169	regulation of spindle assembly	biological_process
GO:0090219	negative regulation of lipid kinase activity	biological_process
GO:0090234	regulation of kinetochore assembly	biological_process
GO:0090311	regulation of protein deacetylation	biological_process
GO:0097001	ceramide binding	molecular_function
GO:0097149	centralspindlin complex	cellular_component
GO:0097157	pre-mRNA intronic binding	molecular_function
GO:0097225	sperm midpiece	cellular_component
GO:1900281	positive regulation of CD4-positive, alpha beta T cell costimulation	biological_process
GO:1900625	positive regulation of monocyte aggregation	biological_process
GO:2000016	negative regulation of determination of dorsal identity	biological_process
GO:2000021	regulation of ion homeostasis	biological_process
GO:2000036	regulation of stem cell maintenance	biological_process
GO:2000042	negative regulation of double-strand break repair via homologous recombination	biological_process
GO:2000045	regulation of G1/S transition of mitotic cell cycle	biological_process
GO:2000095	regulation of Wnt receptor signaling pathway, planar cell polarity pathway	biological_process
GO:2000134	negative regulation of G1/S transition of mitotic cell cycle	biological_process
GO:2000143	negative regulation of DNA-dependent transcription, initiation	biological_process
GO:2000144	positive regulation of DNA-dependent transcription, initiation	biological_process
GO:2000145	regulation of cell motility	biological_process
GO:2000273	positive regulation of receptor activity	biological_process
GO:2000373	positive regulation of DNA topoisomerase (ATP-hydrolyzing) activity	biological_process
GO:2000481	positive regulation of cAMP-dependent protein kinase activity	biological_process
GO:2000504	positive regulation of blood vessel remodeling	biological_process
GO:2000587	negative regulation of platelet-derived growth factor receptor-beta signaling pathway	biological_process
GO:2000615	regulation of histone H3-K9 acetylation	biological_process
GO:2000617	positive regulation of histone H3-K9 acetylation	biological_process
GO:2000620	positive regulation of histone H4-K16 acetylation	biological_process
GO:2000637	positive regulation of gene silencing by miRNA	biological_process
GO:2000648	positive regulation of stem cell proliferation	biological_process
GO:2000685	positive regulation of cellular response to X-ray	biological_process
GO:2000707	positive regulation of dense core granule biogenesis	biological_process
GO:2000724	positive regulation of cardiac vascular smooth muscle cell differentiation	biological_process
GO:2000773	negative regulation of cellular senescence	biological_process
GO:2000774	positive regulation of cellular senescence	biological_process
GO:2000780	negative regulation of double-strand break repair	biological_process
GO:2000802	positive regulation of endocardial cushion to mesenchymal transition involved in heart valve formation	biological_process
GO:2001013	epithelial cell proliferation involved in renal tubule morphogenesis	biological_process
GO:2001015	negative regulation of skeletal muscle cell differentiation	biological_process
GO:2001027	negative regulation of endothelial cell chemotaxis	biological_process
GO:2001033	negative regulation of double-strand break repair via nonhomologous end joining	biological_process
GO:2001038	regulation of cellular response to drug	biological_process
GO:2001181	positive regulation of interleukin-10 secretion	biological_process
GO:2001223	negative regulation of neuron migration	biological_process
GO:2001241	positive regulation of extrinsic apoptotic signaling pathway in absence of ligand	biological_process

## Sheet: Optimal KEGG terms
KEGG ID	KEGG name
hsa00520	Amino sugar and nucleotide sugar metabolism
hsa00563	Glycosylphosphatidylinositol(GPI)-anchor biosynthesis
hsa03015	mRNA surveillance pathway
hsa03440	Homologous recombination
hsa03450	Non-homologous end-joining
hsa04110	Cell cycle
hsa04114	Oocyte meiosis
hsa04330	Notch signaling pathway
